# Supplementary material for: Genome accessibility is widely preserved and locally modulated during mitosis
Source: HighWire-hosted journal article supplement (doi:10.1101/gr.180646.114), 2014-11-04
Supplement: Supplemental_Tables.xlsx [file Supplemental_Tables.xlsx]

## Sheet: README
HotspotTable Column Names	Description
chrom	Chromosome
start	Start coordinate
stop	Stop coordinate
number	Unique identifier
ER4.status	Indicates presence in G1E+GATA1 interphase only (I), mitosis only (M), interphase and mitosis (IM), or not in any G1E+GATA1 data set (None)
G1E.status	Indicates presence in G1E interphase only (I), mitosis only (M), interphase and mitosis (IM), or not in any G1E data set (None)
EMP	Dnase read density (F-seq signal) for G1E+GATA1 mitosis pooled from three biological replicates
EAP	Dnase read density (F-seq signal) for G1E+GATA1 asynchronous pooled from three biological replicates
GAP	Dnase read density (F-seq signal) for G1E asynchronous pooled from three biological replicates
Gata1.status	Indicates overlap with GATA1 ChIP-seq (performed in G1E+GATA1 cells) MACS peak present in interphase-only (I), mitosis-only (M), interphase-and-mitosis (IM), or not in any GATA1 ChIP data set (None)
GMP	Dnase read density (F-seq signal) for G1E mitosis pooled from three biological replicates
Function4.statusnew	Indicates overlap with promoter (AllTSS2), enhancer (Enhancer4), or neither of these two categories (Other).
ER4.MvA	EMP/EAP
G1E.MvA	GMP/GAP
GeneAssign	Name of overlapping or nearest gene
EA1	Dnase read density (F-seq signal) for G1E+GATA1 asynchronous replicate 1
EA2	Dnase read density (F-seq signal) for G1E+GATA1 asynchronous replicate 2
EA3	Dnase read density (F-seq signal) for G1E+GATA1 asynchronous replicate 3
GA1	Dnase read density (F-seq signal) for G1E asynchronous replicate 1
GA2	Dnase read density (F-seq signal) for G1E asynchronous replicate 2
GA3	Dnase read density (F-seq signal) for G1E asynchronous replicate 3
EM1	Dnase read density (F-seq signal) for G1E+GATA1 mitosis replicate 1
EM2	Dnase read density (F-seq signal) for G1E+GATA1 mitosis replicate 2
EM3	Dnase read density (F-seq signal) for G1E+GATA1 mitosis replicate 3
GM1	Dnase read density (F-seq signal) for G1E mitosis replicate 1
GM2	Dnase read density (F-seq signal) for G1E mitosis replicate 2
GM3	Dnase read density (F-seq signal) for G1E mitosis replicate 3
EAP_bkgrdFseq	Estimated Dnase read density (F-seq signal) of background regions outside of hotspots in G1E+GATA1 asynchronous pooled from three biological replicates
EMP_bkgrdFseq	Estimated Dnase read density (F-seq signal) of background regions outside of hotspots in G1E+GATA1 mitosis pooled from three biological replicates
GAP_bkgrdFseq	Estimated Dnase read density (F-seq signal) of background regions outside of hotspots in G1E asynchronous pooled from three biological replicates
GMP_bkgrdFseq	Estimated Dnase read density (F-seq signal) of background regions outside of hotspots in G1E mitosis pooled from three biological replicates
DNAmethylation.status	Indicates overlap with Canyons (UMR_Length >= 3.5kb), cUMR (UMR >=1kb and <3.5kb), or all other
UMR_Length	Indicates width (in bp) of overlapping UMR. If there is no overlap, then 0.
Num_Stam_cells_unique	Number of cell or tissue type with at least one DHS that overlaps with hotspot
GO.sigrec.status	Indicates overlap with genes associated with "signaling receptor activity" (GO.0038023)
GO.txnfactor.status	Indicates overlap with genes associated with "sequence-specific DNA binding transcription factor activity" (GO.0003700)
Stam_peak_cell	Names of cell or tissue types from mouse ENCODE master list of DHS that overlap hotspot
EvGexpression.combostatus	Indicates association with a top 100 up-regulated or top 100 down-regulated gene in G1E to G1E+GATA1, or neither of these categories ('None')
PeaksTable Column Names	Description
ER4.Peak.status	Indicates presence in G1E+GATA1 interphase-only (I), mitosis-only (M), interphase-and-mitosis (IM), or not in any G1E+GATA1 data set (None)
G1E.Peak.status	Indicates presence in G1E interphase-only (I), mitosis-only (M), interphase-and-mitosis (IM), or not in any G1E data set (None)
Note: Columns shared between PeaksTable and HotspotTable are same as described for HotspotTable above.

## Sheet: HotspotTable.txt
chrom	start	stop	number	ER4.status	G1E.status	EMP	EAP	GAP	Gata1.status	GMP	Function4.statusnew	ER4.MvA	G1E.MvA	GeneAssign	EA1	EA2	EA3	GA1	GA2	GA3	EM1	EM2	EM3	GM1	GM2	GM3	EAP_bkgrdFseq	EMP_bkgrdFseq	GAP_bkgrdFseq	GMP_bkgrdFseq	DNAmethylation.status	UMR_Length	Num_Stam_cells_unique	GO.sigrec.status	GO.txnfactor.status	Stam_peak_cell	EvGexpression.combostatus
chr1	3060836	3061865	73044	M	None	0.015	0.0091	0.0106	None	0.0106	Other	1.64835	1	Rp1	0.0089	0.0093	0.0093	0.0098	0.0128	0.011	0.0163	0.0123	0.0142	0.0102	0.0102	0.0119	0.00603021	0.00636885	0.00632008	0.00674847	None	0	0	FALSE	FALSE		None
chr1	3187375	3188020	73052	M	None	0.0197	0.0132	0.0129	None	0.0135	Other	1.49242	1.04651	Rp1	0.0075	0.0221	0.0173	0.0115	0.0142	0.016	0.0152	0.0199	0.0337	0.0122	0.0187	0.0114	0.00603021	0.00636885	0.00632008	0.00674847	None	0	1	FALSE	FALSE	mPATSKI-DS15697	None
chr1	3205808	3206362	73056	M	None	0.0165	0.0114	0.0125	None	0.0148	Other	1.44737	1.184	Xkr4	0.0109	0.0126	0.0112	0.0128	0.013	0.0112	0.0137	0.0194	0.0218	0.0174	0.0107	0.0129	0.00603021	0.00636885	0.00632008	0.00674847	None	0	0	FALSE	FALSE		None
chr1	3217884	3218952	73062	M	None	0.0191	0.0109	0.014	None	0.0134	Other	1.75229	0.957143	Xkr4	0.0106	0.0111	0.0116	0.0157	0.0101	0.0126	0.019	0.0196	0.0189	0.0134	0.0128	0.0142	0.00603021	0.00636885	0.00632008	0.00674847	None	0	1	FALSE	FALSE	mCerebrum-DS14024	None
chr1	3255419	3256048	73063	M	None	0.0188	0.0123	0.0143	None	0.0162	Other	1.52846	1.13287	Xkr4	0.0102	0.0155	0.0137	0.0146	0.0132	0.0143	0.0182	0.0141	0.0263	0.0159	0.0136	0.0195	0.00603021	0.00636885	0.00632008	0.00674847	None	0	1	FALSE	FALSE	mCerebrum-DS14024	None
chr1	3308006	3308638	73066	M	None	0.0176	0.0106	0.0117	None	0.0138	Other	1.66038	1.17949	Xkr4	0.0109	0.0083	0.0123	0.011	0.0111	0.014	0.0171	0.0171	0.0198	0.0151	0.0101	0.0143	0.00603021	0.00636885	0.00632008	0.00674847	None	0	0	FALSE	FALSE		None
chr1	3323083	3323948	73069	M	None	0.0173	0.0134	0.0116	None	0.0141	Other	1.29104	1.21552	Xkr4	0.0107	0.0188	0.0139	0.011	0.0136	0.0118	0.0181	0.0121	0.0211	0.0149	0.0106	0.016	0.00603021	0.00636885	0.00632008	0.00674847	None	0	1	FALSE	FALSE	mBrain-DS12727	None
chr1	3381673	3382345	73070	M	None	0.0183	0.0132	0.0129	None	0.0116	Other	1.38636	0.899225	Xkr4	0.0111	0.0116	0.0206	0.0127	0.0124	0.0141	0.0174	0.0162	0.0237	0.012	0.0118	0.0105	0.00603021	0.00636885	0.00632008	0.00674847	None	0	1	FALSE	FALSE	mCerebrum-DS14024	None
chr1	3406353	3407103	73071	M	None	0.0182	0.0146	0.0154	None	0.0163	Other	1.24658	1.05844	Xkr4	0.0125	0.0171	0.017	0.0166	0.0144	0.0131	0.0181	0.0172	0.0198	0.0139	0.0158	0.0228	0.00603021	0.00636885	0.00632008	0.00674847	None	0	2	FALSE	FALSE	mPATSKI-DS15697 mCerebrum-DS14024	None
chr1	3435562	3436575	73073	None	IM	0.0062	0.0062	0.0267	None	0.0117	Enhancer4	1	0.438202	Xkr4	0.0057	0.0069	0.0065	0.0347	0.0114	0.0171	0.0061	0.0056	0.0074	0.0117	0.0113	0.012	0.00603021	0.00636885	0.00632008	0.00674847	None	0	3	FALSE	FALSE	mESC_FIKO-DS17063 ZhBTc4-DS17616 mGER-DS15400	None
chr1	3437961	3438745	73074	None	I	0.015	0.0085	0.0261	None	0.013	Other	1.76471	0.498084	Xkr4	0.0074	0.0103	0.0092	0.0323	0.0137	0.0189	0.0128	0.0167	0.02	0.0126	0.0169	0.0097	0.00603021	0.00636885	0.00632008	0.00674847	None	0	2	FALSE	FALSE	CH12-DS22542 mPATSKI-DS15697	None
chr1	3441419	3442158	73075	None	I	0.0102	0.0071	0.0224	None	0.0101	Enhancer4	1.43662	0.450893	Xkr4	0.0072	0.0053	0.0092	0.0301	0.0069	0.0138	0.0115	0.0089	0.0075	0.0099	0.0089	0.0119	0.00603021	0.00636885	0.00632008	0.00674847	None	0	1	FALSE	FALSE	mGER-DS15420	None
chr1	3447885	3448239	73076	None	I	0.0089	0.0068	0.0195	None	0.01	Other	1.30882	0.512821	Xkr4	0.0054	0.009	0.0078	0.0255	0.0084	0.012	0.0085	0.0092	0.0098	0.0085	0.0108	0.0129	0.00603021	0.00636885	0.00632008	0.00674847	None	0	1	FALSE	FALSE	mCerebrum-DS14024	None
chr1	3481250	3483003	73078	M	None	0.0189	0.0142	0.0108	None	0.0146	Other	1.33099	1.35185	Xkr4	0.0142	0.0149	0.0137	0.0111	0.0103	0.0103	0.0204	0.0156	0.0182	0.0108	0.0221	0.016	0.00603021	0.00636885	0.00632008	0.00674847	None	0	0	FALSE	FALSE		None
chr1	3521175	3525025	73081	IM	M	0.0238	0.0208	0.0132	None	0.0203	Other	1.14423	1.53788	Xkr4	0.0221	0.0194	0.0192	0.0142	0.0099	0.0129	0.0248	0.0236	0.0208	0.0178	0.0255	0.0211	0.00603021	0.00636885	0.00632008	0.00674847	None	0	1	FALSE	FALSE	mESC_F4WT-DS17060	None
chr1	3525391	3525981	73082	M	None	0.0202	0.0152	0.0153	None	0.0124	Other	1.32895	0.810458	Xkr4	0.0122	0.0193	0.0179	0.0153	0.0173	0.0135	0.0218	0.0156	0.0209	0.01	0.0122	0.0186	0.00603021	0.00636885	0.00632008	0.00674847	None	0	1	FALSE	FALSE	CH12-DS22542	None
chr1	3655357	3655875	73086	M	None	0.0194	0.0119	0.0129	None	0.0092	Other	1.63025	0.713178	Xkr4	0.0097	0.0185	0.0099	0.0123	0.012	0.0151	0.0238	0.0106	0.0157	0.0092	0.0069	0.0116	0.00603021	0.00636885	0.00632008	0.00674847	None	0	0	FALSE	FALSE		None
chr1	3659818	3662919	73087	IM	IM	0.0216	0.0257	0.0115	None	0.0158	AllTSS2	0.840467	1.37391	Xkr4	0.0336	0.0177	0.0151	0.012	0.0111	0.0106	0.025	0.0162	0.0173	0.0177	0.0157	0.0113	0.00603021	0.00636885	0.00632008	0.00674847	cUMR	2396	7	FALSE	FALSE	mBrain-DS12727 mCerebellum-DS14034 mRetina-DS19060 mForelimbBuds-DS18275 mForelimbBuds-DS18275 mMesoderm-DS18198 mBrain-DS12727 E14-DS21450 mRetina-DS20000 mRetina-DS20000	None
chr1	3663597	3663888	73088	M	None	0.0192	0.0159	0.009	None	0.0157	Other	1.20755	1.74444	Rp1	0.018	0.0142	0.0125	0.0087	0.0086	0.0101	0.0208	0.0149	0.0191	0.0169	0.0118	0.0168	0.00603021	0.00636885	0.00632008	0.00674847	None	0	0	FALSE	FALSE		None
chr1	3667194	3667577	73089	M	None	0.0196	0.0116	0.0082	None	0.0123	Other	1.68966	1.5	Rp1	0.0111	0.0145	0.0095	0.0075	0.0103	0.0085	0.0231	0.0158	0.0131	0.009	0.0126	0.0199	0.00603021	0.00636885	0.00632008	0.00674847	None	0	0	FALSE	FALSE		None
chr1	3667730	3668562	73090	M	None	0.0218	0.0151	0.0136	None	0.0152	Other	1.44371	1.11765	Rp1	0.0127	0.0211	0.0141	0.0112	0.0181	0.0168	0.022	0.0215	0.0217	0.0131	0.0191	0.0164	0.00603021	0.00636885	0.00632008	0.00674847	None	0	0	FALSE	FALSE		None
chr1	3681371	3681826	73091	None	M	0.0141	0.0105	0.011	None	0.0203	Other	1.34286	1.84545	Rp1	0.0114	0.0093	0.0097	0.0115	0.0068	0.0132	0.0127	0.014	0.0183	0.0227	0.0197	0.0149	0.00603021	0.00636885	0.00632008	0.00674847	None	0	0	FALSE	FALSE		None
chr1	3715666	3716277	73093	M	None	0.0186	0.0104	0.011	None	0.0115	Other	1.78846	1.04545	Rp1	0.0096	0.0123	0.0102	0.0106	0.0054	0.0168	0.0152	0.0169	0.0314	0.0125	0.0111	0.0093	0.00603021	0.00636885	0.00632008	0.00674847	None	0	0	FALSE	FALSE		None
chr1	3745624	3746195	73097	M	None	0.02	0.0152	0.0145	None	0.0172	Other	1.31579	1.18621	Rp1	0.0181	0.0138	0.0097	0.0127	0.0188	0.0161	0.0217	0.0159	0.0192	0.0166	0.014	0.0219	0.00603021	0.00636885	0.00632008	0.00674847	None	0	0	FALSE	FALSE		None
chr1	3746453	3747678	73098	M	M	0.0194	0.0126	0.0126	None	0.0171	Other	1.53968	1.35714	Rp1	0.012	0.0136	0.013	0.0121	0.0127	0.0139	0.0187	0.0185	0.0226	0.0187	0.0153	0.0152	0.00603021	0.00636885	0.00632008	0.00674847	None	0	0	FALSE	FALSE		None
chr1	3748788	3749039	73099	M	None	0.0194	0.0096	0.0105	None	0.0144	Other	2.02083	1.37143	Rp1	0.0094	0.0066	0.0137	0.0093	0.0162	0.0091	0.0169	0.0172	0.0296	0.0176	0.011	0.0099	0.00603021	0.00636885	0.00632008	0.00674847	None	0	0	FALSE	FALSE		None
chr1	3770458	3771486	73101	M	None	0.018	0.0092	0.0123	None	0.0125	Other	1.95652	1.01626	Rp1	0.0088	0.0084	0.0113	0.0131	0.0106	0.0114	0.0194	0.0133	0.0189	0.0121	0.0122	0.0135	0.00603021	0.00636885	0.00632008	0.00674847	None	0	0	FALSE	FALSE		None
chr1	3852053	3852588	73102	M	None	0.0174	0.0069	0.0093	None	0.0084	Other	2.52174	0.903226	Rp1	0.005	0.0075	0.0114	0.0102	0.0069	0.0088	0.0182	0.0113	0.0221	0.0079	0.009	0.0092	0.00603021	0.00636885	0.00632008	0.00674847	None	0	0	FALSE	FALSE		None
chr1	3908301	3908945	73106	M	None	0.0185	0.0107	0.0112	None	0.0155	Other	1.72897	1.38393	Rp1	0.0082	0.0169	0.0097	0.0116	0.0097	0.0114	0.0181	0.0158	0.0231	0.0154	0.0175	0.0136	0.00603021	0.00636885	0.00632008	0.00674847	None	0	0	FALSE	FALSE		None
chr1	3924105	3924969	73108	None	I	0.009	0.0078	0.0172	None	0.008	Other	1.15385	0.465116	Rp1	0.007	0.0078	0.0098	0.0209	0.0102	0.0128	0.0087	0.0082	0.011	0.0088	0.0078	0.0062	0.00603021	0.00636885	0.00632008	0.00674847	None	0	1	FALSE	FALSE	mRetina-DS20000	None
chr1	4076618	4077217	73117	M	None	0.017	0.0114	0.012	None	0.0143	Other	1.49123	1.19167	Rp1	0.0075	0.0124	0.0202	0.0122	0.0127	0.0109	0.0173	0.0134	0.0204	0.0128	0.0171	0.015	0.00603021	0.00636885	0.00632008	0.00674847	None	0	0	FALSE	FALSE		None
chr1	4102831	4103548	73118	M	None	0.0185	0.0135	0.0137	None	0.017	Other	1.37037	1.24088	Rp1	0.0134	0.0135	0.0137	0.0129	0.0161	0.0141	0.019	0.0162	0.0196	0.0161	0.0195	0.0166	0.00603021	0.00636885	0.00632008	0.00674847	None	0	0	FALSE	FALSE		None
chr1	4103725	4104077	73119	M	None	0.0173	0.0128	0.0129	None	0.0085	Other	1.35156	0.658915	Rp1	0.0113	0.0188	0.0095	0.0116	0.0093	0.0195	0.0185	0.0123	0.0191	0.0059	0.0089	0.0146	0.00603021	0.00636885	0.00632008	0.00674847	None	0	0	FALSE	FALSE		None
chr1	4132484	4133696	73120	None	M	0.013	0.0136	0.0108	None	0.0157	Other	0.955882	1.4537	Rp1	0.0119	0.0166	0.0141	0.0102	0.0145	0.0091	0.013	0.0144	0.0113	0.0133	0.0176	0.0195	0.00603021	0.00636885	0.00632008	0.00674847	None	0	1	FALSE	FALSE	CH12-DS22542	None
chr1	4218203	4218702	73126	None	I	0.0067	0.0102	0.0165	None	0.0119	Other	0.656863	0.721212	Rp1	0.0099	0.0071	0.0147	0.0159	0.0225	0.0134	0.0064	0.0057	0.009	0.0129	0.0083	0.0132	0.00603021	0.00636885	0.00632008	0.00674847	None	0	1	FALSE	FALSE	CH12-DS22542	None
chr1	4245597	4246723	73128	IM	IM	0.0171	0.0225	0.0125	None	0.0174	Other	0.76	1.392	Rp1	0.0274	0.0158	0.0182	0.0135	0.0104	0.0111	0.0162	0.0177	0.0192	0.018	0.0159	0.0173	0.00603021	0.00636885	0.00632008	0.00674847	None	0	1	FALSE	FALSE	ZhBTc4-DS17562	None
chr1	4248703	4250843	73129	IM	IM	0.0171	0.0219	0.0153	None	0.0185	Other	0.780822	1.20915	Rp1	0.0241	0.017	0.0222	0.0136	0.0158	0.0197	0.0152	0.0211	0.0184	0.0178	0.0206	0.018	0.00603021	0.00636885	0.00632008	0.00674847	None	0	1	FALSE	FALSE	mCJ7-DS13320	None
chr1	4322376	4323044	73134	None	I	0.0072	0.0092	0.0208	None	0.006	Other	0.782609	0.288462	Rp1	0.0088	0.0115	0.0073	0.021	0.0249	0.0167	0.0062	0.0093	0.0078	0.0047	0.007	0.0082	0.00603021	0.00636885	0.00632008	0.00674847	None	0	1	FALSE	FALSE	CH12-DS22542	None
chr1	4336034	4336875	73135	IM	I	0.0176	0.0156	0.0266	None	0.0135	Other	1.12821	0.507519	Rp1	0.0135	0.0183	0.0175	0.026	0.0285	0.0268	0.0185	0.0158	0.0168	0.0144	0.013	0.0116	0.00603021	0.00636885	0.00632008	0.00674847	None	0	1	FALSE	FALSE	CH12-DS22542	None
chr1	4343517	4344088	73138	M	M	0.0176	0.0132	0.0094	None	0.0187	Other	1.33333	1.98936	Rp1	0.0141	0.0136	0.0105	0.0085	0.0096	0.012	0.0144	0.0256	0.0179	0.0183	0.019	0.0192	0.00603021	0.00636885	0.00632008	0.00674847	None	0	1	FALSE	FALSE	mRetina-DS19060	None
chr1	4396702	4396975	73141	M	None	0.0205	0.0141	0.0155	None	0.0216	Other	1.4539	1.39355	Rp1	0.0134	0.0188	0.0107	0.0144	0.0145	0.0193	0.0202	0.0226	0.0189	0.0238	0.0166	0.0212	0.00603021	0.00636885	0.00632008	0.00674847	None	0	0	FALSE	FALSE		None
chr1	4406567	4407424	73142	IM	IM	0.0226	0.0237	0.0347	None	0.0174	Other	0.953586	0.501441	Rp1	0.0198	0.0238	0.0336	0.035	0.0364	0.0327	0.0208	0.0265	0.0235	0.0152	0.0197	0.0202	0.00603021	0.00636885	0.00632008	0.00674847	None	0	1	FALSE	FALSE	CH12-DS22542	None
chr1	4407822	4408481	73143	None	I	0.0132	0.0102	0.025	None	0.014	Other	1.29412	0.56	Rp1	0.0104	0.0096	0.0101	0.0328	0.0123	0.0134	0.0136	0.0104	0.0151	0.0137	0.0137	0.0152	0.00603021	0.00636885	0.00632008	0.00674847	None	0	1	FALSE	FALSE	m416B-DS14099	None
chr1	4413684	4415395	73144	M	I	0.0139	0.0139	0.0347	None	0.0181	Enhancer4	1	0.521614	Rp1	0.0156	0.0115	0.0122	0.0432	0.0188	0.0242	0.0126	0.0148	0.017	0.0175	0.0168	0.021	0.00603021	0.00636885	0.00632008	0.00674847	None	0	1	FALSE	FALSE	CH12-DS22542 CH12-DS22542	None
chr1	4415449	4415700	73145	None	M	0.0117	0.0158	0.0169	None	0.0209	Enhancer4	0.740506	1.23669	Rp1	0.0174	0.0081	0.0206	0.017	0.0141	0.0188	0.013	0.0121	0.0071	0.0234	0.0187	0.0171	0.00603021	0.00636885	0.00632008	0.00674847	None	0	0	FALSE	FALSE		None
chr1	4415778	4416166	73146	None	I	0.0187	0.0121	0.0219	None	0.0171	Enhancer4	1.54545	0.780822	Rp1	0.0121	0.0104	0.0139	0.0249	0.015	0.0195	0.0165	0.0249	0.0185	0.0168	0.0211	0.0136	0.00603021	0.00636885	0.00632008	0.00674847	None	0	1	FALSE	FALSE	CH12-DS22542	None
chr1	4417409	4417661	73147	None	I	0.0135	0.0127	0.0228	None	0.0122	Other	1.06299	0.535088	Rp1	0.0144	0.0132	0.0079	0.0272	0.0185	0.0142	0.0134	0.0159	0.0111	0.0107	0.0145	0.0133	0.00603021	0.00636885	0.00632008	0.00674847	None	0	1	FALSE	FALSE	CH12-DS22542	None
chr1	4419974	4420605	73148	None	I	0.011	0.0089	0.0242	None	0.0129	Enhancer4	1.23596	0.533058	Rp1	0.0072	0.011	0.0107	0.0309	0.0166	0.0116	0.0107	0.0097	0.0132	0.0129	0.0129	0.0128	0.00603021	0.00636885	0.00632008	0.00674847	None	0	2	FALSE	FALSE	CH12-DS22542 mMesoderm-DS18198	None
chr1	4422014	4422514	73149	None	I	0.0123	0.0067	0.0213	None	0.008	Other	1.83582	0.375587	Rp1	0.0063	0.0068	0.0077	0.029	0.0108	0.0082	0.0136	0.0087	0.0126	0.0061	0.0131	0.0073	0.00603021	0.00636885	0.00632008	0.00674847	None	0	0	FALSE	FALSE		None
chr1	4422768	4423117	73150	M	I	0.0196	0.0118	0.0228	None	0.0186	Other	1.66102	0.815789	Rp1	0.0103	0.0135	0.0138	0.0249	0.0164	0.0221	0.0201	0.0159	0.0224	0.017	0.0172	0.0241	0.00603021	0.00636885	0.00632008	0.00674847	None	0	1	FALSE	FALSE	ZhBTc4-DS17562	None
chr1	4424719	4425150	73151	M	None	0.0203	0.015	0.0166	None	0.0134	Other	1.35333	0.807229	Rp1	0.0114	0.0211	0.0172	0.0176	0.0155	0.0148	0.0165	0.0228	0.0291	0.0137	0.0105	0.0158	0.00603021	0.00636885	0.00632008	0.00674847	None	0	0	FALSE	FALSE		None
chr1	4443683	4444415	73152	M	None	0.0201	0.0173	0.0124	None	0.0149	Other	1.16185	1.20161	Rp1	0.0159	0.0208	0.0165	0.0137	0.0121	0.0091	0.0199	0.0221	0.0184	0.0132	0.0189	0.0148	0.00603021	0.00636885	0.00632008	0.00674847	None	0	0	FALSE	FALSE		None
chr1	4444610	4445387	73153	IM	M	0.0186	0.0181	0.0126	None	0.0191	Other	1.02762	1.51587	Rp1	0.0192	0.0144	0.0198	0.0139	0.0102	0.0111	0.0195	0.0192	0.0152	0.0167	0.0246	0.0193	0.00603021	0.00636885	0.00632008	0.00674847	None	0	0	FALSE	FALSE		None
chr1	4446525	4446802	73154	I	None	0.0182	0.0223	0.0131	None	0.0179	Other	0.816143	1.36641	Rp1	0.0233	0.0252	0.0164	0.0154	0.0141	0.0056	0.0126	0.0229	0.03	0.0162	0.0224	0.0173	0.00603021	0.00636885	0.00632008	0.00674847	None	0	0	FALSE	FALSE		None
chr1	4461403	4461786	73155	None	M	0.0155	0.0141	0.0148	None	0.0257	Other	1.09929	1.73649	Rp1	0.0166	0.009	0.0138	0.0155	0.0149	0.0127	0.0174	0.0128	0.0125	0.0323	0.0165	0.0192	0.00603021	0.00636885	0.00632008	0.00674847	None	0	2	FALSE	FALSE	mHeart-DS17909 mESC_FIKO-DS17063	None
chr1	4462757	4463010	73156	M	None	0.0204	0.0122	0.0162	None	0.0167	Other	1.67213	1.03086	Rp1	0.0096	0.0125	0.0184	0.0163	0.0114	0.0196	0.0221	0.0165	0.0194	0.0148	0.0155	0.0225	0.00603021	0.00636885	0.00632008	0.00674847	None	0	0	FALSE	FALSE		None
chr1	4463140	4463784	73157	None	I	0.0122	0.0107	0.027	None	0.0161	Enhancer4	1.14019	0.596296	Rp1	0.0095	0.0137	0.0102	0.0293	0.0152	0.0303	0.0136	0.0116	0.0085	0.0149	0.016	0.0191	0.00603021	0.00636885	0.00632008	0.00674847	None	0	0	FALSE	FALSE		None
chr1	4464364	4465130	73158	None	I	0.014	0.0108	0.0302	None	0.0151	Enhancer4	1.2963	0.5	Rp1	0.0103	0.011	0.0117	0.0341	0.0316	0.0182	0.0144	0.0123	0.0145	0.0173	0.0126	0.0123	0.00603021	0.00636885	0.00632008	0.00674847	None	0	0	FALSE	FALSE		None
chr1	4478869	4480153	73159	M	None	0.0246	0.0176	0.0174	None	0.0175	Other	1.39773	1.00575	Rp1	0.0125	0.0257	0.0209	0.0187	0.0142	0.0164	0.0283	0.0187	0.0199	0.0162	0.0211	0.0169	0.00603021	0.00636885	0.00632008	0.00674847	None	0	0	FALSE	FALSE		None
chr1	4480270	4485494	73160	IM	IM	0.0382	0.0335	0.0162	None	0.0241	Other	1.1403	1.48765	Sox17	0.0389	0.0297	0.0239	0.0172	0.0149	0.0145	0.0449	0.0274	0.0299	0.0195	0.0304	0.0291	0.00603021	0.00636885	0.00632008	0.00674847	cUMR	2951	11	FALSE	TRUE	ZhBTc4-DS15236 CH12-DS22542 mRetina-DS20000 mRetina-DS19060 mRetina-DS19060 ZhBTc4-DS17562 E14-DS21450 mESC_F4WT-DS17060 ZhBTc4-DS17562 ZhBTc4-DS17562 mCJ7-DS13320 mMesoderm-DS18198 ZhBTc4-DS17616 ZhBTc4-DS17562 mfBrain-DS14536 mRetina-DS20000 ZhBTc4-DS15236 mRetina-DS20000	None
chr1	4485799	4488191	73161	IM	IM	0.0267	0.026	0.0199	None	0.0239	AllTSS2	1.02692	1.20101	Sox17	0.0306	0.0204	0.0211	0.0225	0.015	0.0167	0.0285	0.0288	0.0184	0.02	0.0312	0.0261	0.00603021	0.00636885	0.00632008	0.00674847	cUMR	2951	6	FALSE	TRUE	mfBrain-DS14536 mCJ7-DS13320 mMesoderm-DS18198 mMesoderm-DS18198 ZhBTc4-DS15236 mCJ7-DS13320 mHeart-DS17909 mCJ7-DS13320 mRetina-DS20000	None
chr1	4514664	4515272	73162	None	M	0.0187	0.0205	0.0134	None	0.0256	Other	0.912195	1.91045	Rp1	0.0275	0.009	0.016	0.0129	0.0124	0.0157	0.0184	0.0212	0.0164	0.0218	0.0349	0.0251	0.00603021	0.00636885	0.00632008	0.00674847	None	0	0	FALSE	FALSE		None
chr1	4515517	4516134	73163	I	None	0.0185	0.0224	0.0118	None	0.0223	Other	0.825893	1.88983	Rp1	0.0323	0.0098	0.0122	0.013	0.0103	0.0098	0.0162	0.0235	0.02	0.0211	0.0309	0.0164	0.00603021	0.00636885	0.00632008	0.00674847	None	0	0	FALSE	FALSE		None
chr1	4544327	4544851	73164	IM	None	0.0238	0.021	0.0162	None	0.0164	Other	1.13333	1.01235	Rp1	0.0185	0.0299	0.0169	0.0155	0.0206	0.0145	0.0215	0.0196	0.0359	0.0152	0.0183	0.0173	0.00603021	0.00636885	0.00632008	0.00674847	None	0	0	FALSE	FALSE		None
chr1	4559732	4562556	73165	IM	M	0.0269	0.0234	0.0138	None	0.0179	Other	1.14957	1.2971	Rp1	0.0257	0.0224	0.0187	0.0137	0.014	0.0141	0.0313	0.0193	0.0222	0.0164	0.0231	0.0163	0.00603021	0.00636885	0.00632008	0.00674847	None	0	4	FALSE	FALSE	mKidney-DS13948 mPATSKI-DS15697 ZhBTc4-DS17562 mForelimbBuds-DS18275	None
chr1	4562889	4564630	73166	IM	None	0.0308	0.0195	0.0145	None	0.017	Other	1.57949	1.17241	Rp1	0.0178	0.0243	0.0184	0.0161	0.0122	0.0116	0.0369	0.0208	0.0233	0.0158	0.0205	0.0165	0.00603021	0.00636885	0.00632008	0.00674847	None	0	1	FALSE	FALSE	mHeart-DS17909	None
chr1	4565229	4565491	73167	M	None	0.0209	0.0195	0.0181	None	0.023	Other	1.07179	1.27072	Rp1	0.0179	0.0217	0.0209	0.0156	0.0256	0.0191	0.0242	0.0142	0.0182	0.0193	0.0305	0.0242	0.00603021	0.00636885	0.00632008	0.00674847	None	0	0	FALSE	FALSE		None
chr1	4585458	4585728	73168	I	None	0.0184	0.0205	0.0186	None	0.0206	Other	0.897561	1.10753	Mrpl15	0.0207	0.0175	0.0235	0.0195	0.0144	0.0193	0.0197	0.0148	0.0188	0.0226	0.0164	0.02	0.00603021	0.00636885	0.00632008	0.00674847	None	0	0	FALSE	FALSE		None
chr1	4588332	4588884	73169	IM	M	0.0209	0.0185	0.0194	None	0.0234	Other	1.12973	1.20619	Mrpl15	0.0186	0.0174	0.0196	0.0196	0.0168	0.0211	0.0233	0.0143	0.0212	0.0219	0.0235	0.0272	0.00603021	0.00636885	0.00632008	0.00674847	None	0	1	FALSE	FALSE	ZhBTc4-DS17562	None
chr1	4590833	4591203	73170	M	None	0.0201	0.0175	0.0175	None	0.0168	Other	1.14857	0.96	Mrpl15	0.0152	0.0227	0.0173	0.0163	0.0264	0.0131	0.0185	0.0241	0.0208	0.0206	0.0132	0.0112	0.00603021	0.00636885	0.00632008	0.00674847	None	0	1	FALSE	FALSE	CH12-DS22542	None
chr1	4598838	4599351	73171	M	None	0.0217	0.0192	0.0134	None	0.0182	Other	1.13021	1.35821	Mrpl15	0.017	0.0245	0.0187	0.0119	0.0143	0.017	0.0225	0.0175	0.0241	0.0209	0.0143	0.0154	0.00603021	0.00636885	0.00632008	0.00674847	None	0	1	FALSE	FALSE	mKidney-DS13948	None
chr1	4603597	4604157	73172	M	M	0.022	0.0177	0.0182	None	0.0222	Other	1.24294	1.21978	Mrpl15	0.0185	0.0147	0.0191	0.018	0.0187	0.0182	0.0216	0.0228	0.0224	0.0275	0.0174	0.0141	0.00603021	0.00636885	0.00632008	0.00674847	None	0	1	FALSE	FALSE	mLung-DS14479	None
chr1	4664565	4665156	73174	M	None	0.0169	0.0116	0.0089	None	0.0087	Other	1.4569	0.977528	Mrpl15	0.0096	0.0142	0.0135	0.0077	0.014	0.008	0.0136	0.0145	0.0302	0.0077	0.0115	0.0082	0.00603021	0.00636885	0.00632008	0.00674847	None	0	0	FALSE	FALSE		None
chr1	4677341	4679714	73175	IM	IM	0.0238	0.0277	0.0171	None	0.0213	Other	0.859206	1.24561	Mrpl15	0.0338	0.019	0.0221	0.0184	0.014	0.016	0.0253	0.0223	0.0208	0.0201	0.0255	0.0199	0.00603021	0.00636885	0.00632008	0.00674847	None	0	7	FALSE	FALSE	ZhBTc4-DS15236 mMesoderm-DS18198 mESC_FIKO-DS17063 ZhBTc4-DS17562 mESC_F4WT-DS17060 E14-DS21450 ZhBTc4-DS17616	None
chr1	4679956	4680625	73176	M	None	0.0216	0.0159	0.0107	None	0.0169	Other	1.35849	1.57944	Mrpl15	0.0174	0.0145	0.0139	0.0092	0.0163	0.0102	0.0261	0.0167	0.0133	0.0138	0.0232	0.0179	0.00603021	0.00636885	0.00632008	0.00674847	None	0	0	FALSE	FALSE		None
chr1	4682574	4682916	73177	None	M	0.0162	0.0153	0.0167	None	0.0203	Other	1.05882	1.21557	Mrpl15	0.0169	0.0094	0.018	0.0165	0.0175	0.0167	0.0159	0.0195	0.0131	0.0229	0.0164	0.018	0.00603021	0.00636885	0.00632008	0.00674847	None	0	0	FALSE	FALSE		None
chr1	4696171	4696658	73178	IM	I	0.0207	0.0176	0.0242	None	0.0204	Other	1.17614	0.842975	Mrpl15	0.0162	0.0203	0.0182	0.0287	0.0182	0.0163	0.0192	0.0183	0.0283	0.0188	0.0187	0.0262	0.00603021	0.00636885	0.00632008	0.00674847	None	0	1	FALSE	FALSE	m416B-DS14099	None
chr1	4735296	4735547	73179	M	None	0.021	0.0206	0.0254	None	0.0162	Other	1.01942	0.637795	Mrpl15	0.0182	0.0218	0.0254	0.0249	0.026	0.0262	0.0185	0.0207	0.0294	0.0154	0.0161	0.018	0.00603021	0.00636885	0.00632008	0.00674847	None	0	0	FALSE	FALSE		None
chr1	4745967	4746704	73180	None	I	0.0147	0.0171	0.0319	None	0.0152	Enhancer4	0.859649	0.476489	Mrpl15	0.0169	0.0139	0.0215	0.0313	0.0315	0.034	0.0122	0.0204	0.0156	0.0135	0.0184	0.0159	0.00603021	0.00636885	0.00632008	0.00674847	None	0	1	FALSE	FALSE	mfLiver_F5-DS20999	None
chr1	4751648	4752613	73181	IM	None	0.0192	0.0213	0.0132	None	0.0191	Other	0.901408	1.44697	Mrpl15	0.023	0.0205	0.0178	0.0132	0.0122	0.0141	0.0184	0.0228	0.0172	0.0189	0.0197	0.0192	0.00603021	0.00636885	0.00632008	0.00674847	None	0	0	FALSE	FALSE		None
chr1	4752745	4753744	73182	IM	M	0.023	0.0227	0.0176	None	0.0221	Other	1.01322	1.25568	Mrpl15	0.0232	0.0228	0.0216	0.0171	0.0144	0.0217	0.0246	0.022	0.0193	0.0248	0.0222	0.0154	0.00603021	0.00636885	0.00632008	0.00674847	None	0	0	FALSE	FALSE		None
chr1	4758378	4759068	73183	IM	I	0.0197	0.0264	0.0308	None	0.0187	Enhancer4	0.746212	0.607143	Mrpl15	0.0209	0.0311	0.0351	0.0298	0.0349	0.0301	0.0195	0.0228	0.0169	0.011	0.0292	0.0268	0.00603021	0.00636885	0.00632008	0.00674847	None	0	2	FALSE	FALSE	mTN-DS16171 mLiver-DS14005	None
chr1	4759391	4760599	73184	IM	IM	0.0212	0.0306	0.037	None	0.0288	Other	0.69281	0.778378	Mrpl15	0.028	0.0302	0.0376	0.0339	0.044	0.04	0.0221	0.0255	0.0134	0.022	0.0335	0.0409	0.00603021	0.00636885	0.00632008	0.00674847	None	0	1	FALSE	FALSE	mNIH_3T3-DS16900	None
chr1	4760967	4761440	73185	I	I	0.0157	0.0206	0.0245	None	0.02	Other	0.762136	0.816327	Mrpl15	0.0202	0.0196	0.0229	0.0265	0.019	0.0235	0.0178	0.0118	0.0137	0.0191	0.0218	0.0203	0.00603021	0.00636885	0.00632008	0.00674847	None	0	1	FALSE	FALSE	mATr-DS20149	None
chr1	4765028	4765773	73186	M	I	0.0222	0.0203	0.0232	None	0.0194	Enhancer4	1.0936	0.836207	Mrpl15	0.0215	0.0163	0.0219	0.02	0.022	0.0332	0.0194	0.0269	0.0257	0.0191	0.0174	0.022	0.00603021	0.00636885	0.00632008	0.00674847	None	0	2	FALSE	FALSE	m416B-DS14099 mIntestine_Large-DS19140	None
chr1	4770019	4770746	73187	None	I	0.0107	0.0178	0.0335	None	0.0122	Other	0.601124	0.364179	Mrpl15	0.0154	0.0185	0.0232	0.031	0.037	0.0375	0.0094	0.0133	0.0115	0.0099	0.0135	0.0165	0.00603021	0.00636885	0.00632008	0.00674847	None	0	2	FALSE	FALSE	m416B-DS14099 mPATSKI-DS15697	None
chr1	4773716	4774487	73188	M	I	0.0215	0.0172	0.0239	None	0.0201	Other	1.25	0.841004	Mrpl15	0.0124	0.0233	0.0222	0.0255	0.0234	0.0199	0.0225	0.0193	0.0212	0.0166	0.021	0.0276	0.00603021	0.00636885	0.00632008	0.00674847	None	0	2	FALSE	FALSE	CH12-DS22542 mLiver-DS14005	None
chr1	4774818	4776717	73189	IM	IM	0.0337	0.056	0.0768	I	0.0355	AllTSS2	0.601786	0.46224	Mrpl15	0.0555	0.0588	0.0541	0.0871	0.048	0.072	0.0369	0.0278	0.0307	0.0283	0.045	0.0436	0.00603021	0.00636885	0.00632008	0.00674847	cUMR	1560	6	FALSE	FALSE	mfLiver_F2-DS20994 E14-DS21450 mTN-DS16171 mPATSKI-DS15697 mPATSKI-DS15697 mATn-DS17070 mGER-DS15410	None
chr1	4793733	4794218	73190	M	None	0.021	0.013	0.0155	None	0.0163	Enhancer4	1.61538	1.05161	Lypla1	0.0103	0.0162	0.0163	0.0174	0.0118	0.0133	0.0209	0.0205	0.0218	0.0142	0.0143	0.0238	0.00603021	0.00636885	0.00632008	0.00674847	None	0	1	FALSE	FALSE	ZhBTc4-DS15236	None
chr1	4796681	4799551	73191	IM	IM	0.0607	0.0713	0.0537	None	0.038	AllTSS2	0.851332	0.707635	Lypla1	0.0719	0.0768	0.0632	0.0622	0.0361	0.0444	0.0738	0.043	0.0407	0.0307	0.0523	0.0413	0.00603021	0.00636885	0.00632008	0.00674847	cUMR	1239	9	FALSE	FALSE	mESC_F4WT-DS17060 mfLiver-DS20666 mTN-DS16171 mCD19-DS16168 m3134-DS8497 mfLiver_F3-DS20937 MEL-DS13036 mGER-DS15410 mfLiver_F3-DS20937 mKidney-DS13948	None
chr1	4799659	4799937	73192	M	None	0.0219	0.0198	0.0164	None	0.015	Enhancer4	1.10606	0.914634	Lypla1	0.0146	0.0287	0.0226	0.0203	0.0098	0.011	0.0223	0.0235	0.0185	0.0136	0.0127	0.021	0.00603021	0.00636885	0.00632008	0.00674847	None	0	1	FALSE	FALSE	mKidney-DS13948	None
chr1	4800272	4800807	73193	M	None	0.0199	0.0197	0.0195	None	0.0134	Enhancer4	1.01015	0.687179	Lypla1	0.0166	0.0269	0.0191	0.0213	0.0176	0.0159	0.0226	0.0181	0.0139	0.0129	0.015	0.0128	0.00603021	0.00636885	0.00632008	0.00674847	None	0	2	FALSE	FALSE	ZhBTc4-DS17562 mKidney-DS13948	None
chr1	4846350	4849100	73194	IM	IM	0.0446	0.0605	0.0636	I	0.0403	AllTSS2	0.73719	0.633648	Tcea1	0.0608	0.0674	0.0517	0.0678	0.0485	0.0646	0.0514	0.0369	0.0325	0.0317	0.0561	0.0448	0.00603021	0.00636885	0.00632008	0.00674847	cUMR	1484	9	FALSE	FALSE	ZhBTc4-DS17616 mGER-DS15400 mGER-DS15400 m416B-DS14099 mMuscle_Skeletal-DS18130 mATn-DS17070 mKidney-DS13948 mPATSKI-DS15697 mA20-DS16695 mGenitalFatPad-DS18780	None
chr1	4898195	4898777	73196	M	None	0.0209	0.015	0.0178	None	0.0172	Other	1.39333	0.966292	Rgs20	0.0113	0.0236	0.0143	0.016	0.0184	0.0222	0.0193	0.0248	0.0212	0.0159	0.0196	0.018	0.00603021	0.00636885	0.00632008	0.00674847	None	0	1	FALSE	FALSE	mCerebrum-DS14024	None
chr1	4900541	4902521	73197	IM	IM	0.0222	0.0218	0.021	None	0.022	Other	1.01835	1.04762	Rgs20	0.0232	0.0193	0.0212	0.0198	0.0175	0.0271	0.0212	0.0238	0.0235	0.0233	0.0207	0.0202	0.00603021	0.00636885	0.00632008	0.00674847	None	0	1	FALSE	FALSE	mPATSKI-DS15697	None
chr1	4902591	4902890	73198	I	None	0.0184	0.021	0.0196	None	0.0214	Other	0.87619	1.09184	Rgs20	0.0213	0.0228	0.0181	0.0199	0.0164	0.0214	0.0162	0.026	0.0162	0.0184	0.0275	0.0225	0.00603021	0.00636885	0.00632008	0.00674847	None	0	0	FALSE	FALSE		None
chr1	4903249	4903550	73199	M	None	0.0193	0.0146	0.0193	None	0.0194	Other	1.32192	1.00518	Rgs20	0.0101	0.0277	0.0109	0.0193	0.0219	0.0172	0.0172	0.0172	0.0284	0.0177	0.0188	0.0244	0.00603021	0.00636885	0.00632008	0.00674847	None	0	0	FALSE	FALSE		None
chr1	4907043	4907556	73200	M	None	0.0205	0.014	0.0139	None	0.0154	Other	1.46429	1.10791	Rgs20	0.015	0.0116	0.0143	0.0115	0.0141	0.0206	0.0203	0.0188	0.0233	0.016	0.0112	0.0183	0.00603021	0.00636885	0.00632008	0.00674847	None	0	0	FALSE	FALSE		None
chr1	4914087	4914822	73201	I	M	0.0189	0.0223	0.0165	None	0.0255	Other	0.847534	1.54545	Rgs20	0.0241	0.0228	0.0169	0.0146	0.0218	0.0175	0.0175	0.0214	0.0205	0.0233	0.0257	0.0307	0.00603021	0.00636885	0.00632008	0.00674847	None	0	2	FALSE	FALSE	E14-DS21450 ZhBTc4-DS15236	None
chr1	4916129	4916644	73202	M	None	0.0212	0.0179	0.0142	None	0.0197	Other	1.18436	1.38732	Rgs20	0.0187	0.0153	0.0185	0.0112	0.0208	0.0173	0.0211	0.0185	0.0249	0.0179	0.0215	0.0221	0.00603021	0.00636885	0.00632008	0.00674847	None	0	1	FALSE	FALSE	mCerebrum-DS14024	None
chr1	5005091	5006741	73203	M	None	0.0236	0.0167	0.0143	None	0.0179	Other	1.41317	1.25175	Rgs20	0.0148	0.0194	0.0187	0.0148	0.0145	0.0129	0.024	0.0204	0.0263	0.016	0.0175	0.0228	0.00603021	0.00636885	0.00632008	0.00674847	None	0	1	FALSE	FALSE	m3134-DS8497	None
chr1	5006815	5012546	73204	IM	IM	0.0351	0.0359	0.0147	None	0.0301	AllTSS2	0.977716	2.04762	Rgs20	0.0452	0.0259	0.0242	0.0152	0.0122	0.0154	0.0362	0.0382	0.0279	0.0258	0.0406	0.0299	0.00603021	0.00636885	0.00632008	0.00674847	Canyon	4488	9	FALSE	FALSE	mCJ7-DS13320 m3134-DS8497 m3134-DS8497 m3134-DS8497 mGenitalFatPad-DS18780 mRetina-DS20000 m3134-DS8497 E14-DS21450 mMesoderm-DS18198 m3134-DS8497 mRetina-DS20000 mBrain-DS12727 ZhBTc4-DS15236 mCerebrum-DS14024	None
chr1	5012587	5014024	73205	IM	M	0.0197	0.0234	0.0119	None	0.0212	Other	0.84188	1.78151	Rgs20	0.0295	0.0152	0.0175	0.01	0.0141	0.0158	0.0223	0.0186	0.0129	0.0207	0.0216	0.0222	0.00603021	0.00636885	0.00632008	0.00674847	Canyon	4488	4	FALSE	FALSE	mPATSKI-DS15697 mfBrain-DS14536 mCerebellum-DS14034 mGenitalFatPad-DS18780 mfBrain-DS14536	None
chr1	5014078	5014363	73206	M	None	0.0189	0.0188	0.0104	None	0.0155	Other	1.00532	1.49038	Rgs20	0.0188	0.0197	0.0176	0.0094	0.0188	0.006	0.0214	0.0184	0.0115	0.0139	0.0183	0.0163	0.00603021	0.00636885	0.00632008	0.00674847	None	0	0	FALSE	FALSE		None
chr1	5017227	5017576	73207	IM	None	0.0186	0.0202	0.0165	None	0.0177	Other	0.920792	1.07273	Rgs20	0.0162	0.0266	0.0231	0.0158	0.0184	0.017	0.019	0.0204	0.0154	0.0171	0.0172	0.0195	0.00603021	0.00636885	0.00632008	0.00674847	None	0	0	FALSE	FALSE		None
chr1	5018195	5018534	73208	M	None	0.022	0.0169	0.0136	None	0.0169	Other	1.30178	1.24265	Rgs20	0.0149	0.0198	0.0184	0.0144	0.0112	0.0136	0.0203	0.0205	0.029	0.0162	0.0128	0.0229	0.00603021	0.00636885	0.00632008	0.00674847	None	0	0	FALSE	FALSE		None
chr1	5054507	5054758	73209	M	None	0.0215	0.013	0.0161	None	0.017	Other	1.65385	1.0559	Rgs20	0.0119	0.0137	0.015	0.018	0.0129	0.0138	0.0178	0.0236	0.0308	0.0203	0.0105	0.0156	0.00603021	0.00636885	0.00632008	0.00674847	None	0	0	FALSE	FALSE		None
chr1	5072605	5074893	73211	IM	IM	0.046	0.0626	0.0561	None	0.0323	AllTSS2	0.734824	0.575758	Atp6v1h	0.0599	0.07	0.0608	0.0656	0.029	0.0521	0.0525	0.0378	0.0351	0.0263	0.0451	0.0337	0.00603021	0.00636885	0.00632008	0.00674847	None	0	4	FALSE	FALSE	MEL-DS13036 m3134-DS8497 m3134-DS8497 mCD19-DS16168 mNIH_3T3-DS16900	None
chr1	5075692	5076036	73212	M	None	0.021	0.0118	0.0196	None	0.0144	Enhancer4	1.77966	0.734694	Atp6v1h	0.011	0.0114	0.0145	0.0211	0.0169	0.018	0.0223	0.0199	0.018	0.0154	0.014	0.0125	0.00603021	0.00636885	0.00632008	0.00674847	None	0	1	FALSE	FALSE	mfLiver_F5-DS20999	None
chr1	5094234	5094873	73213	I	I	0.0106	0.0233	0.0246	None	0.013	Other	0.454936	0.528455	Atp6v1h	0.0184	0.0245	0.0343	0.0149	0.0276	0.049	0.0065	0.0116	0.0221	0.0089	0.0166	0.0197	0.00603021	0.00636885	0.00632008	0.00674847	None	0	0	FALSE	FALSE		None
chr1	5118985	5119994	73214	M	None	0.0199	0.0128	0.0141	None	0.0143	Other	1.55469	1.01418	Atp6v1h	0.0134	0.0123	0.0119	0.0142	0.014	0.0138	0.0197	0.0165	0.0243	0.0148	0.0146	0.0125	0.00603021	0.00636885	0.00632008	0.00674847	None	0	1	FALSE	FALSE	mPATSKI-DS15697 mPATSKI-DS15697	None
chr1	5149650	5150808	73215	M	None	0.0217	0.0172	0.0174	None	0.0169	Other	1.26163	0.971264	Atp6v1h	0.0137	0.0155	0.028	0.0172	0.0189	0.0166	0.0217	0.0211	0.0223	0.0173	0.0128	0.0202	0.00603021	0.00636885	0.00632008	0.00674847	None	0	1	FALSE	FALSE	mHeart-DS17909	None
chr1	5160257	5161279	73216	I	M	0.0162	0.0222	0.0097	None	0.0197	Other	0.72973	2.03093	Rgs20	0.0285	0.0148	0.0147	0.0113	0.0046	0.0094	0.0181	0.0145	0.0126	0.02	0.0198	0.0188	0.00603021	0.00636885	0.00632008	0.00674847	None	0	2	FALSE	FALSE	mESC_F4WT-DS17060 mCJ7-DS13320	None
chr1	5173054	5174030	73217	IM	IM	0.0203	0.0196	0.0171	None	0.0265	Other	1.03571	1.54971	Rgs20	0.0191	0.0196	0.0207	0.0179	0.0142	0.0172	0.0188	0.0223	0.0231	0.0271	0.0267	0.0249	0.00603021	0.00636885	0.00632008	0.00674847	None	0	1	FALSE	FALSE	mCJ7-DS13320	None
chr1	5177430	5178966	73218	IM	None	0.0187	0.0186	0.0124	None	0.0176	Other	1.00538	1.41935	Rgs20	0.02	0.0201	0.0133	0.012	0.0132	0.0127	0.0173	0.0237	0.017	0.0139	0.0231	0.021	0.00603021	0.00636885	0.00632008	0.00674847	None	0	0	FALSE	FALSE		None
chr1	5199735	5200003	73219	M	None	0.0197	0.0157	0.0141	None	0.0154	Other	1.25478	1.0922	Rgs20	0.0121	0.0218	0.0177	0.0131	0.0166	0.0147	0.0185	0.0231	0.0196	0.0184	0.0133	0.0102	0.00603021	0.00636885	0.00632008	0.00674847	None	0	0	FALSE	FALSE		None
chr1	5200831	5201216	73220	None	M	0.0183	0.0175	0.0119	None	0.0204	Other	1.04571	1.71429	Rgs20	0.0196	0.018	0.0113	0.0121	0.0126	0.0107	0.0188	0.016	0.0197	0.0245	0.0149	0.0158	0.00603021	0.00636885	0.00632008	0.00674847	None	0	0	FALSE	FALSE		None
chr1	5216688	5217091	73222	M	None	0.0182	0.016	0.01	None	0.0147	Other	1.1375	1.47	Rgs20	0.0172	0.0134	0.0156	0.0117	0.0076	0.0073	0.0164	0.0212	0.0205	0.0116	0.0165	0.0206	0.00603021	0.00636885	0.00632008	0.00674847	None	0	0	FALSE	FALSE		None
chr1	5219803	5220899	73225	M	None	0.0203	0.0156	0.0139	None	0.0183	Other	1.30128	1.31655	Rgs20	0.0147	0.0175	0.0159	0.013	0.0126	0.0177	0.0204	0.0196	0.0207	0.0176	0.0182	0.0203	0.00603021	0.00636885	0.00632008	0.00674847	None	0	0	FALSE	FALSE		None
chr1	5221228	5222430	73226	M	IM	0.0186	0.0151	0.0152	None	0.0196	Other	1.23179	1.28947	Rgs20	0.0136	0.0167	0.0169	0.0133	0.0152	0.0204	0.0172	0.0207	0.0206	0.0196	0.0198	0.0195	0.00603021	0.00636885	0.00632008	0.00674847	None	0	3	FALSE	FALSE	CH12-DS22542 mA20-DS16695 mMesoderm-DS18198	None
chr1	5234128	5234566	73227	M	None	0.0191	0.0137	0.0117	None	0.0147	Other	1.39416	1.25641	Rgs20	0.0124	0.0117	0.0195	0.0113	0.0154	0.0098	0.0165	0.0175	0.0295	0.0134	0.0137	0.019	0.00603021	0.00636885	0.00632008	0.00674847	None	0	0	FALSE	FALSE		None
chr1	5235229	5235673	73228	M	None	0.018	0.011	0.012	None	0.0107	Other	1.63636	0.891667	Rgs20	0.0099	0.0138	0.0103	0.0128	0.0122	0.0096	0.0195	0.0146	0.0172	0.0106	0.0135	0.0083	0.00603021	0.00636885	0.00632008	0.00674847	None	0	1	FALSE	FALSE	mA20-DS16695	None
chr1	5330958	5331589	73232	M	None	0.018	0.0142	0.0145	None	0.0126	Other	1.26761	0.868966	Rgs20	0.012	0.0171	0.0162	0.0172	0.015	0.0065	0.0168	0.017	0.0229	0.0121	0.0096	0.017	0.00603021	0.00636885	0.00632008	0.00674847	None	0	0	FALSE	FALSE		None
chr1	5402504	5403317	73236	M	None	0.0197	0.0124	0.0126	None	0.0163	Other	1.58871	1.29365	Rgs20	0.0121	0.0136	0.0117	0.0115	0.0149	0.0139	0.0212	0.0183	0.0168	0.0171	0.0118	0.0192	0.00603021	0.00636885	0.00632008	0.00674847	None	0	1	FALSE	FALSE	mMesoderm-DS18198	None
chr1	5483592	5484569	73240	M	M	0.018	0.0113	0.0123	None	0.0173	Other	1.59292	1.4065	Rgs20	0.0091	0.0127	0.0153	0.0106	0.0178	0.0124	0.0201	0.0134	0.017	0.0171	0.0169	0.0179	0.00603021	0.00636885	0.00632008	0.00674847	None	0	0	FALSE	FALSE		None
chr1	5486579	5487076	73241	M	None	0.0186	0.0134	0.0128	None	0.0121	Other	1.38806	0.945312	Rgs20	0.0123	0.0121	0.0176	0.0112	0.0156	0.0148	0.0162	0.0174	0.0276	0.0133	0.0114	0.01	0.00603021	0.00636885	0.00632008	0.00674847	None	0	0	FALSE	FALSE		None
chr1	5494441	5495018	73242	M	None	0.0186	0.0086	0.0105	None	0.0117	Other	2.16279	1.11429	Rgs20	0.0065	0.0114	0.0107	0.0121	0.0072	0.009	0.0187	0.0184	0.0183	0.0106	0.0106	0.0155	0.00603021	0.00636885	0.00632008	0.00674847	None	0	0	FALSE	FALSE		None
chr1	5531037	5532227	73243	M	I	0.0191	0.0128	0.0132	None	0.0145	Other	1.49219	1.09848	Rgs20	0.0133	0.013	0.0116	0.0142	0.0122	0.0112	0.0195	0.0203	0.0165	0.0137	0.012	0.0191	0.00603021	0.00636885	0.00632008	0.00674847	None	0	0	FALSE	FALSE		None
chr1	5547666	5548288	73244	M	None	0.0184	0.0094	0.014	None	0.0162	Other	1.95745	1.15714	Rgs20	0.0084	0.0101	0.0111	0.0139	0.0201	0.0091	0.0181	0.0161	0.0224	0.0152	0.0142	0.021	0.00603021	0.00636885	0.00632008	0.00674847	None	0	0	FALSE	FALSE		None
chr1	5577235	5580100	73245	IM	IM	0.0213	0.0188	0.0124	None	0.0237	AllTSS2	1.13298	1.91129	Oprk1	0.0218	0.0143	0.0164	0.0117	0.0106	0.0162	0.0193	0.0249	0.0233	0.021	0.0316	0.0223	0.00603021	0.00636885	0.00632008	0.00674847	None	0	3	TRUE	FALSE	ZhBTc4-DS15236 mMesoderm-DS18198 mBrain-DS12727	None
chr1	5650871	5651464	73250	M	None	0.0172	0.0122	0.0122	None	0.0153	Other	1.40984	1.2541	Rb1cc1	0.012	0.0118	0.0134	0.0117	0.0103	0.0152	0.015	0.0199	0.0211	0.0146	0.0138	0.0185	0.00603021	0.00636885	0.00632008	0.00674847	None	0	0	FALSE	FALSE		None
chr1	5774710	5775224	73253	M	None	0.0177	0.0096	0.0101	None	0.0122	Other	1.84375	1.20792	Rb1cc1	0.0068	0.0156	0.0098	0.0083	0.0142	0.0118	0.0211	0.0119	0.014	0.0116	0.0146	0.0114	0.00603021	0.00636885	0.00632008	0.00674847	None	0	0	FALSE	FALSE		None
chr1	5780779	5782121	73254	None	M	0.014	0.0137	0.0121	None	0.0191	Other	1.0219	1.57851	Rb1cc1	0.0147	0.0135	0.0113	0.0125	0.0113	0.0117	0.0147	0.0143	0.0113	0.0207	0.0185	0.0155	0.00603021	0.00636885	0.00632008	0.00674847	None	0	0	FALSE	FALSE		None
chr1	5784491	5785361	73255	M	M	0.0186	0.0143	0.0159	None	0.0158	Other	1.3007	0.993711	Rb1cc1	0.0136	0.0168	0.0131	0.0151	0.0143	0.0192	0.0179	0.0177	0.0218	0.02	0.01	0.0115	0.00603021	0.00636885	0.00632008	0.00674847	None	0	0	FALSE	FALSE		None
chr1	5809452	5810183	73256	M	None	0.0157	0.0124	0.0093	None	0.013	Other	1.26613	1.39785	Rb1cc1	0.0118	0.0138	0.0123	0.0095	0.0115	0.0068	0.0151	0.0193	0.0132	0.0121	0.0113	0.0168	0.00603021	0.00636885	0.00632008	0.00674847	None	0	0	FALSE	FALSE		None
chr1	5894747	5895349	73257	None	I	0.0065	0.0069	0.0174	None	0.007	Other	0.942029	0.402299	Rb1cc1	0.0058	0.0091	0.0071	0.0193	0.0164	0.0127	0.0077	0.0048	0.0046	0.0055	0.01	0.0072	0.00603021	0.00636885	0.00632008	0.00674847	None	0	1	FALSE	FALSE	CH12-DS22542	None
chr1	5903392	5903733	73258	M	None	0.0189	0.0126	0.0095	None	0.0133	Other	1.5	1.4	Rb1cc1	0.0109	0.0183	0.0104	0.0091	0.0122	0.0087	0.0187	0.019	0.0194	0.0143	0.0115	0.0128	0.00603021	0.00636885	0.00632008	0.00674847	None	0	0	FALSE	FALSE		None
chr1	5904095	5904499	73259	M	None	0.019	0.0141	0.0097	None	0.0145	Other	1.34752	1.49485	Npbwr1	0.012	0.0176	0.0153	0.0098	0.0121	0.0072	0.0197	0.014	0.0227	0.0117	0.018	0.0178	0.00603021	0.00636885	0.00632008	0.00674847	None	0	0	TRUE	FALSE		None
chr1	5904638	5908264	73260	IM	IM	0.026	0.0242	0.0121	None	0.0206	AllTSS2	1.07438	1.70248	Npbwr1	0.0293	0.0186	0.0178	0.0126	0.0134	0.0098	0.026	0.0263	0.0254	0.0173	0.0271	0.0221	0.00603021	0.00636885	0.00632008	0.00674847	None	0	4	TRUE	FALSE	CH12-DS22542 E14-DS21450 mMesoderm-DS18198 E14-DS21450 E14-DS21450 mESC_F4WT-DS17060	None
chr1	5908645	5909576	73261	M	None	0.0211	0.0146	0.0102	None	0.0162	Other	1.44521	1.58824	Rb1cc1	0.0132	0.0172	0.0149	0.0102	0.0129	0.0079	0.0243	0.0146	0.0185	0.0131	0.021	0.0192	0.00603021	0.00636885	0.00632008	0.00674847	None	0	0	FALSE	FALSE		None
chr1	5929283	5929741	73262	M	M	0.0178	0.0126	0.0135	None	0.0181	Other	1.4127	1.34074	Rb1cc1	0.0128	0.0093	0.0157	0.0127	0.0184	0.0118	0.0157	0.0181	0.024	0.0221	0.0109	0.0156	0.00603021	0.00636885	0.00632008	0.00674847	None	0	0	FALSE	FALSE		None
chr1	5929898	5930463	73263	M	None	0.0182	0.0097	0.0118	None	0.013	Other	1.87629	1.10169	Rb1cc1	0.0093	0.0114	0.0087	0.0114	0.0135	0.0117	0.022	0.0113	0.0146	0.0121	0.0155	0.0125	0.00603021	0.00636885	0.00632008	0.00674847	None	0	0	FALSE	FALSE		None
chr1	5978767	5979329	73266	M	None	0.0192	0.0131	0.0118	None	0.0161	Other	1.46565	1.36441	Rb1cc1	0.0101	0.0196	0.0134	0.0114	0.012	0.0126	0.02	0.0142	0.0228	0.0165	0.0146	0.0169	0.00603021	0.00636885	0.00632008	0.00674847	None	0	0	FALSE	FALSE		None
chr1	6006134	6006693	73270	M	None	0.0197	0.0131	0.0154	None	0.0158	Other	1.50382	1.02597	Rb1cc1	0.0091	0.0238	0.0107	0.0143	0.0163	0.0178	0.0193	0.0196	0.021	0.0143	0.0161	0.0192	0.00603021	0.00636885	0.00632008	0.00674847	None	0	0	FALSE	FALSE		None
chr1	6031524	6031947	73271	M	None	0.0185	0.0106	0.0122	None	0.0147	Other	1.74528	1.20492	Rb1cc1	0.0083	0.0156	0.0104	0.0114	0.0084	0.0179	0.0183	0.0215	0.0157	0.0171	0.0095	0.0145	0.00603021	0.00636885	0.00632008	0.00674847	None	0	0	FALSE	FALSE		None
chr1	6048656	6049630	73273	M	None	0.019	0.0107	0.0097	None	0.0111	Other	1.7757	1.14433	Rb1cc1	0.0101	0.0119	0.011	0.0105	0.0099	0.0073	0.0199	0.0161	0.0197	0.0098	0.0109	0.0145	0.00603021	0.00636885	0.00632008	0.00674847	None	0	1	FALSE	FALSE	mCJ7-DS13320	None
chr1	6077020	6077670	73276	M	None	0.0256	0.0142	0.0107	None	0.0166	Other	1.80282	1.5514	Rb1cc1	0.0113	0.0197	0.0153	0.0084	0.0147	0.0135	0.0216	0.017	0.0485	0.0127	0.0236	0.0189	0.00603021	0.00636885	0.00632008	0.00674847	None	0	0	FALSE	FALSE		None
chr1	6099494	6100003	73277	None	I	0.0107	0.013	0.0147	None	0.0124	Other	0.823077	0.843537	Rb1cc1	0.0109	0.0124	0.0192	0.0158	0.012	0.0138	0.0088	0.017	0.0089	0.0126	0.0089	0.0157	0.00603021	0.00636885	0.00632008	0.00674847	None	0	0	FALSE	FALSE		None
chr1	6104692	6105270	73278	M	None	0.0189	0.0109	0.0099	None	0.0159	Other	1.73394	1.60606	Rb1cc1	0.0099	0.012	0.0119	0.0099	0.0103	0.0094	0.0202	0.0141	0.0209	0.0174	0.0147	0.0132	0.00603021	0.00636885	0.00632008	0.00674847	None	0	0	FALSE	FALSE		None
chr1	6123855	6124245	73279	M	None	0.0195	0.0162	0.0118	None	0.0187	Other	1.2037	1.58475	Rb1cc1	0.0147	0.0154	0.0209	0.0109	0.0117	0.0143	0.0174	0.0174	0.0287	0.018	0.0192	0.02	0.00603021	0.00636885	0.00632008	0.00674847	None	0	0	FALSE	FALSE		None
chr1	6124704	6124985	73280	M	None	0.0163	0.0106	0.0134	None	0.014	Other	1.53774	1.04478	Rb1cc1	0.0103	0.0127	0.0089	0.0158	0.0023	0.0157	0.0156	0.0225	0.0111	0.0144	0.0101	0.0169	0.00603021	0.00636885	0.00632008	0.00674847	None	0	0	FALSE	FALSE		None
chr1	6150178	6150435	73281	M	None	0.0168	0.0121	0.0095	None	0.013	Other	1.38843	1.36842	Rb1cc1	0.0125	0.0142	0.0086	0.0116	0.0041	0.008	0.0175	0.0176	0.0137	0.0132	0.0123	0.0134	0.00603021	0.00636885	0.00632008	0.00674847	None	0	0	FALSE	FALSE		None
chr1	6150632	6152228	73282	M	M	0.0216	0.0134	0.013	None	0.0177	Other	1.61194	1.36154	Rb1cc1	0.013	0.0149	0.0124	0.0124	0.0155	0.0124	0.0217	0.0217	0.0213	0.0186	0.018	0.0151	0.00603021	0.00636885	0.00632008	0.00674847	None	0	1	FALSE	FALSE	ZhBTc4-DS17562	None
chr1	6153023	6153623	73283	M	None	0.0149	0.0111	0.01	None	0.0125	Other	1.34234	1.25	Rb1cc1	0.0107	0.0121	0.0111	0.0095	0.009	0.012	0.0141	0.0159	0.0164	0.0127	0.0142	0.0101	0.00603021	0.00636885	0.00632008	0.00674847	None	0	0	FALSE	FALSE		None
chr1	6163828	6164465	73285	I	None	0.0111	0.0147	0.0116	None	0.0105	Other	0.755102	0.905172	Rb1cc1	0.0185	0.0098	0.0108	0.0102	0.0111	0.0158	0.0099	0.0106	0.0156	0.013	0.0074	0.0077	0.00603021	0.00636885	0.00632008	0.00674847	None	0	2	FALSE	FALSE	mESC_F4WT-DS17060 mESC_FIKO-DS17063	None
chr1	6165294	6165638	73286	None	M	0.0183	0.0159	0.0146	None	0.0237	Other	1.15094	1.62329	Rb1cc1	0.0137	0.021	0.0153	0.0112	0.0184	0.021	0.018	0.0202	0.0168	0.0244	0.024	0.0214	0.00603021	0.00636885	0.00632008	0.00674847	None	0	0	FALSE	FALSE		None
chr1	6178500	6178777	73292	None	I	0.0166	0.0165	0.0193	None	0.0153	Enhancer4	1.00606	0.792746	Rb1cc1	0.0189	0.0143	0.013	0.0156	0.026	0.0242	0.0157	0.0176	0.0184	0.0168	0.0161	0.0106	0.00603021	0.00636885	0.00632008	0.00674847	None	0	1	FALSE	FALSE	ZhBTc4-DS17562	None
chr1	6188387	6188698	73293	M	None	0.0199	0.0137	0.0122	None	0.0196	Other	1.45255	1.60656	Rb1cc1	0.0135	0.0146	0.0134	0.0099	0.0163	0.0152	0.018	0.0226	0.023	0.0188	0.0237	0.0172	0.00603021	0.00636885	0.00632008	0.00674847	None	0	0	FALSE	FALSE		None
chr1	6204011	6205781	73294	IM	IM	0.0383	0.0535	0.0452	I	0.0347	AllTSS2	0.715888	0.767699	Rb1cc1	0.0642	0.0419	0.0398	0.0515	0.0292	0.0409	0.0421	0.035	0.03	0.0336	0.0374	0.0345	0.00603021	0.00636885	0.00632008	0.00674847	cUMR	2009	5	FALSE	FALSE	mGER-DS15400 mPATSKI-DS15697 m3134-DS8497 m3134-DS8497 mATr-DS20149 mMesoderm-DS18198 mPATSKI-DS15697	None
chr1	6212908	6213551	73295	None	I	0.0132	0.0141	0.0198	None	0.0135	Enhancer4	0.93617	0.681818	Rb1cc1	0.0117	0.0189	0.0143	0.0223	0.0171	0.0148	0.0121	0.0151	0.0142	0.0153	0.0098	0.013	0.00603021	0.00636885	0.00632008	0.00674847	None	0	1	FALSE	FALSE	mGER-DS15420	None
chr1	6216901	6217430	73297	M	None	0.0166	0.0178	0.0105	I	0.0097	Enhancer4	0.932584	0.92381	Rb1cc1	0.0162	0.0137	0.0267	0.0118	0.006	0.0108	0.0173	0.0188	0.0116	0.0103	0.0076	0.0107	0.00603021	0.00636885	0.00632008	0.00674847	None	0	1	FALSE	FALSE	mGER-DS15420	None
chr1	6262121	6262935	73299	IM	IM	0.0126	0.0165	0.0304	None	0.0163	Other	0.763636	0.536184	Rb1cc1	0.0139	0.0179	0.0212	0.0285	0.0329	0.0334	0.0097	0.0192	0.0142	0.0118	0.0217	0.0218	0.00603021	0.00636885	0.00632008	0.00674847	None	0	1	FALSE	FALSE	CH12-DS22542	None
chr1	6267109	6267625	73300	M	None	0.0183	0.013	0.0167	None	0.0163	Other	1.40769	0.976048	Rb1cc1	0.0109	0.0138	0.0173	0.0156	0.0234	0.0141	0.0181	0.0191	0.0181	0.0175	0.015	0.0147	0.00603021	0.00636885	0.00632008	0.00674847	None	0	1	FALSE	FALSE	mMuscle_Skeletal-DS18130	None
chr1	6303376	6303762	73301	M	None	0.0185	0.013	0.0107	None	0.016	Other	1.42308	1.49533	Rb1cc1	0.0135	0.017	0.0071	0.0106	0.012	0.01	0.0148	0.0217	0.0265	0.0182	0.0117	0.015	0.00603021	0.00636885	0.00632008	0.00674847	None	0	0	FALSE	FALSE		None
chr1	6311927	6312547	73302	M	None	0.0185	0.0119	0.0128	None	0.0131	Other	1.55462	1.02344	Rb1cc1	0.0115	0.0131	0.0118	0.0137	0.0178	0.0059	0.016	0.0146	0.0309	0.0153	0.0102	0.0108	0.00603021	0.00636885	0.00632008	0.00674847	None	0	0	FALSE	FALSE		None
chr1	6312936	6313682	73303	M	None	0.0223	0.0124	0.0119	None	0.0144	Other	1.79839	1.21008	Rb1cc1	0.0112	0.0158	0.0116	0.0117	0.0119	0.0124	0.023	0.0184	0.0248	0.0151	0.0121	0.0151	0.00603021	0.00636885	0.00632008	0.00674847	None	0	2	FALSE	FALSE	mPATSKI-DS15697 mNIH_3T3-DS16900	None
chr1	6314356	6314908	73304	M	None	0.0201	0.0107	0.0085	None	0.0129	Other	1.8785	1.51765	Rb1cc1	0.0104	0.0142	0.0074	0.0069	0.009	0.0124	0.0198	0.0176	0.024	0.0129	0.0159	0.0097	0.00603021	0.00636885	0.00632008	0.00674847	None	0	0	FALSE	FALSE		None
chr1	6346830	6347466	73305	M	None	0.0203	0.0127	0.0132	None	0.0112	Other	1.59843	0.848485	Rb1cc1	0.0108	0.0133	0.0168	0.0115	0.0119	0.0188	0.0175	0.0215	0.0279	0.0094	0.011	0.0158	0.00603021	0.00636885	0.00632008	0.00674847	None	0	1	FALSE	FALSE	mLung-DS14479	None
chr1	6348795	6349769	73306	IM	None	0.017	0.019	0.011	None	0.0151	AllTSS2	0.894737	1.37273	Fam150a	0.0234	0.0122	0.0158	0.0109	0.0129	0.01	0.0181	0.0169	0.0137	0.0157	0.0142	0.0142	0.00603021	0.00636885	0.00632008	0.00674847	None	0	2	FALSE	FALSE	mPATSKI-DS15697 mMesoderm-DS18198	None
chr1	6363475	6364069	73307	IM	M	0.0206	0.0165	0.0128	None	0.0178	Other	1.24848	1.39062	Fam150a	0.0157	0.0146	0.0207	0.0132	0.015	0.0097	0.0213	0.0157	0.024	0.0195	0.0126	0.0193	0.00603021	0.00636885	0.00632008	0.00674847	None	0	0	FALSE	FALSE		None
chr1	6372766	6373429	73308	I	None	0.0134	0.0206	0.0101	None	0.0143	Other	0.650485	1.41584	Fam150a	0.03	0.01	0.0092	0.0115	0.0069	0.009	0.0168	0.0092	0.0077	0.0164	0.0139	0.0097	0.00603021	0.00636885	0.00632008	0.00674847	None	0	2	FALSE	FALSE	mPATSKI-DS15697 mMesoderm-DS18198 mPATSKI-DS15697	None
chr1	6376958	6378082	73309	IM	None	0.0235	0.017	0.0158	None	0.0169	Other	1.38235	1.06962	Fam150a	0.0134	0.0226	0.0196	0.0154	0.0142	0.0185	0.0256	0.0198	0.0214	0.0157	0.0155	0.0213	0.00603021	0.00636885	0.00632008	0.00674847	None	0	0	FALSE	FALSE		None
chr1	6378784	6379037	73310	M	None	0.0188	0.0124	0.0134	None	0.0155	Other	1.51613	1.15672	Fam150a	0.0072	0.0189	0.018	0.0168	0.0128	0.0041	0.0196	0.0132	0.0232	0.0125	0.0183	0.0202	0.00603021	0.00636885	0.00632008	0.00674847	None	0	0	FALSE	FALSE		None
chr1	6393432	6394434	73311	IM	M	0.0226	0.0198	0.0171	None	0.0205	Other	1.14141	1.19883	St18	0.0177	0.0209	0.0239	0.0188	0.0099	0.0182	0.021	0.0231	0.0271	0.0238	0.0176	0.0156	0.00603021	0.00636885	0.00632008	0.00674847	None	0	0	FALSE	FALSE		None
chr1	6396215	6397016	73312	I	I	0.0139	0.0212	0.0245	None	0.0175	Other	0.65566	0.714286	St18	0.0182	0.0246	0.025	0.0251	0.0265	0.0213	0.0117	0.0147	0.0198	0.0165	0.0159	0.0216	0.00603021	0.00636885	0.00632008	0.00674847	None	0	3	FALSE	FALSE	m416B-DS14099 mPATSKI-DS15697 mThymus-DS18819	None
chr1	6406454	6407010	73313	I	None	0.0193	0.0199	0.0158	None	0.0204	Other	0.969849	1.29114	St18	0.0221	0.0117	0.0239	0.0152	0.0179	0.0159	0.0172	0.0251	0.0187	0.0224	0.016	0.0202	0.00603021	0.00636885	0.00632008	0.00674847	None	0	0	FALSE	FALSE		None
chr1	6407718	6408562	73314	IM	IM	0.018	0.0226	0.025	None	0.0192	Other	0.79646	0.768	St18	0.0178	0.0281	0.0284	0.0229	0.0314	0.0258	0.0154	0.0194	0.0245	0.0186	0.0147	0.0251	0.00603021	0.00636885	0.00632008	0.00674847	None	0	1	FALSE	FALSE	mPATSKI-DS15697	None
chr1	6427504	6432775	73316	IM	IM	0.0312	0.0295	0.0152	None	0.0251	Other	1.05763	1.65132	St18	0.0335	0.028	0.0208	0.016	0.014	0.0141	0.0339	0.0276	0.0272	0.0229	0.0307	0.0245	0.00603021	0.00636885	0.00632008	0.00674847	None	0	4	FALSE	FALSE	mESC_FIKO-DS17063 mMesoderm-DS18198 ZhBTc4-DS17616 E14-DS21450	None
chr1	6433161	6433979	73317	M	M	0.0247	0.0159	0.0118	None	0.0188	Other	1.55346	1.59322	St18	0.0131	0.0235	0.0144	0.0132	0.0124	0.0074	0.0302	0.0179	0.0154	0.0171	0.0166	0.025	0.00603021	0.00636885	0.00632008	0.00674847	None	0	0	FALSE	FALSE		None
chr1	6437873	6438526	73318	M	None	0.0222	0.0148	0.0136	None	0.0157	Other	1.5	1.15441	St18	0.0132	0.0127	0.0213	0.0148	0.0083	0.0144	0.02	0.0279	0.0224	0.0144	0.0212	0.0132	0.00603021	0.00636885	0.00632008	0.00674847	None	0	2	FALSE	FALSE	mHindlimbsBuds-DS18279 E14-DS21450 E14-DS21450	None
chr1	6457648	6458277	73319	M	None	0.0197	0.0122	0.0105	None	0.0166	Other	1.61475	1.58095	St18	0.0101	0.0153	0.014	0.0102	0.01	0.0118	0.0146	0.0226	0.0325	0.0166	0.0194	0.0138	0.00603021	0.00636885	0.00632008	0.00674847	None	0	0	FALSE	FALSE		None
chr1	6462707	6463268	73320	M	None	0.0201	0.0126	0.016	None	0.0145	Other	1.59524	0.90625	St18	0.0106	0.0165	0.0133	0.0162	0.0203	0.0117	0.0229	0.0158	0.016	0.0132	0.0138	0.0185	0.00603021	0.00636885	0.00632008	0.00674847	None	0	0	FALSE	FALSE		None
chr1	6470635	6471186	73321	M	None	0.0217	0.0155	0.0146	None	0.0188	Other	1.4	1.28767	St18	0.0171	0.015	0.0119	0.0139	0.0189	0.0127	0.0241	0.0197	0.0164	0.0202	0.0131	0.0212	0.00603021	0.00636885	0.00632008	0.00674847	None	0	0	FALSE	FALSE		None
chr1	6567904	6568426	73322	M	None	0.0179	0.0124	0.0113	None	0.0144	Other	1.44355	1.27434	St18	0.0076	0.0158	0.0208	0.0102	0.0165	0.0099	0.0184	0.0126	0.0227	0.0129	0.0159	0.0163	0.00603021	0.00636885	0.00632008	0.00674847	None	0	0	FALSE	FALSE		None
chr1	6569210	6569479	73323	M	None	0.0187	0.0147	0.0114	None	0.0128	Other	1.27211	1.12281	St18	0.0095	0.0202	0.0216	0.0098	0.0165	0.0118	0.0185	0.0132	0.0261	0.0124	0.011	0.0159	0.00603021	0.00636885	0.00632008	0.00674847	None	0	0	FALSE	FALSE		None
chr1	6583359	6584039	73324	M	None	0.019	0.0128	0.0119	None	0.0154	Other	1.48438	1.29412	St18	0.0119	0.0149	0.0124	0.0118	0.0152	0.0094	0.0207	0.0149	0.0184	0.0181	0.0096	0.015	0.00603021	0.00636885	0.00632008	0.00674847	None	0	0	FALSE	FALSE		None
chr1	6597142	6597769	73327	None	M	0.0138	0.0131	0.0146	None	0.0185	Other	1.05344	1.26712	St18	0.0148	0.0095	0.013	0.013	0.0166	0.0174	0.0122	0.0151	0.0171	0.0201	0.0188	0.0141	0.00603021	0.00636885	0.00632008	0.00674847	None	0	0	FALSE	FALSE		None
chr1	6611295	6612226	73328	M	None	0.019	0.0107	0.0136	None	0.0154	Other	1.7757	1.13235	St18	0.0098	0.0124	0.011	0.0121	0.0128	0.0185	0.0192	0.0174	0.02	0.0144	0.0148	0.0185	0.00603021	0.00636885	0.00632008	0.00674847	None	0	0	FALSE	FALSE		None
chr1	6623700	6624121	73329	None	M	0.0151	0.013	0.0123	None	0.0186	Other	1.16154	1.5122	St18	0.0106	0.0166	0.0147	0.0119	0.0146	0.0114	0.0148	0.0177	0.0125	0.0182	0.0186	0.0195	0.00603021	0.00636885	0.00632008	0.00674847	None	0	0	FALSE	FALSE		None
chr1	6675412	6675956	73334	M	None	0.0179	0.0106	0.0105	None	0.009	Other	1.68868	0.857143	St18	0.0085	0.0152	0.0105	0.0103	0.0137	0.0085	0.018	0.0196	0.0155	0.0099	0.0078	0.0081	0.00603021	0.00636885	0.00632008	0.00674847	None	0	0	FALSE	FALSE		None
chr1	6751749	6752190	73336	M	None	0.0184	0.0104	0.0131	None	0.0149	Other	1.76923	1.1374	St18	0.0115	0.0112	0.0064	0.0136	0.0136	0.0116	0.0213	0.0088	0.0207	0.0163	0.0128	0.0134	0.00603021	0.00636885	0.00632008	0.00674847	None	0	0	FALSE	TRUE		None
chr1	6791515	6792318	73339	M	None	0.0196	0.0108	0.0121	None	0.0153	Other	1.81481	1.26446	St18	0.0084	0.0123	0.0152	0.0103	0.0157	0.0142	0.0192	0.0188	0.0218	0.0146	0.0186	0.0138	0.00603021	0.00636885	0.00632008	0.00674847	None	0	1	FALSE	TRUE	mfBrain-DS14536	None
chr1	6792680	6794106	73340	M	M	0.0204	0.0154	0.0133	None	0.0195	AllTSS2	1.32468	1.46617	St18	0.0139	0.0179	0.0164	0.0126	0.0163	0.0128	0.0199	0.0193	0.0233	0.0195	0.0192	0.0196	0.00603021	0.00636885	0.00632008	0.00674847	None	0	0	FALSE	TRUE		None
chr1	6794465	6796145	73341	IM	IM	0.0194	0.0177	0.016	None	0.0205	Other	1.09605	1.28125	St18	0.0191	0.0168	0.0152	0.0152	0.0161	0.0181	0.0176	0.0233	0.0207	0.0222	0.0178	0.0191	0.00603021	0.00636885	0.00632008	0.00674847	None	0	1	FALSE	TRUE	mBrain-DS12727	None
chr1	6798130	6798577	73342	M	None	0.0184	0.012	0.0146	None	0.0168	Other	1.53333	1.15068	St18	0.0127	0.0107	0.0118	0.0128	0.0166	0.0179	0.0197	0.0149	0.0188	0.0178	0.0138	0.0174	0.00603021	0.00636885	0.00632008	0.00674847	None	0	0	FALSE	TRUE		None
chr1	6801522	6801931	73343	None	M	0.0186	0.0155	0.0108	None	0.0207	Other	1.2	1.91667	St18	0.0202	0.0081	0.0122	0.0105	0.0093	0.0129	0.018	0.0235	0.0147	0.024	0.0168	0.0168	0.00603021	0.00636885	0.00632008	0.00674847	None	0	0	FALSE	TRUE		None
chr1	6810873	6811315	73344	M	None	0.0196	0.0148	0.0145	None	0.0156	Other	1.32432	1.07586	St18	0.0171	0.0113	0.0129	0.016	0.014	0.0105	0.0211	0.0185	0.0159	0.0179	0.0089	0.0167	0.00603021	0.00636885	0.00632008	0.00674847	None	0	1	FALSE	TRUE	mCerebellum-DS14034	None
chr1	6811478	6811920	73345	M	None	0.0186	0.0095	0.0124	None	0.0139	Other	1.95789	1.12097	St18	0.0102	0.0096	0.0077	0.0125	0.0153	0.0094	0.0196	0.0167	0.0176	0.0166	0.0105	0.0107	0.00603021	0.00636885	0.00632008	0.00674847	None	0	0	FALSE	TRUE		None
chr1	6812257	6812543	73346	None	M	0.019	0.0113	0.0118	None	0.0213	Other	1.68142	1.80508	St18	0.0118	0.007	0.015	0.0102	0.0153	0.0133	0.0193	0.0157	0.0219	0.0194	0.0238	0.0235	0.00603021	0.00636885	0.00632008	0.00674847	None	0	0	FALSE	TRUE		None
chr1	6831390	6832250	73347	M	None	0.0217	0.0125	0.0147	None	0.0142	Other	1.736	0.965986	St18	0.0112	0.0152	0.0129	0.0138	0.0158	0.0163	0.0205	0.0232	0.0235	0.0162	0.0097	0.014	0.00603021	0.00636885	0.00632008	0.00674847	None	0	0	FALSE	TRUE		None
chr1	6860430	6860971	73349	I	M	0.0148	0.0162	0.0125	None	0.0217	Other	0.91358	1.736	St18	0.016	0.0163	0.0166	0.0121	0.0187	0.0087	0.0159	0.0148	0.0111	0.0247	0.021	0.0149	0.00603021	0.00636885	0.00632008	0.00674847	None	0	1	FALSE	FALSE	mCJ7-DS13320	None
chr1	6917118	6917925	73354	None	IM	0.0148	0.015	0.0163	None	0.0212	Other	0.986667	1.30061	St18	0.0157	0.0121	0.0167	0.015	0.0205	0.0164	0.0134	0.0151	0.0191	0.0192	0.0241	0.0232	0.00603021	0.00636885	0.00632008	0.00674847	None	0	0	FALSE	FALSE		None
chr1	6924596	6925633	73356	M	None	0.0215	0.0152	0.0112	None	0.0136	Other	1.41447	1.21429	St18	0.0125	0.0177	0.0189	0.0116	0.0097	0.0112	0.019	0.0242	0.0261	0.0103	0.0174	0.0175	0.00603021	0.00636885	0.00632008	0.00674847	None	0	0	FALSE	FALSE		None
chr1	6926822	6927574	73357	M	None	0.018	0.0165	0.0106	None	0.0163	Other	1.09091	1.53774	St18	0.0125	0.0198	0.0229	0.0086	0.0138	0.0137	0.0197	0.014	0.0172	0.0132	0.0199	0.0202	0.00603021	0.00636885	0.00632008	0.00674847	None	0	2	FALSE	FALSE	mESC_FIKO-DS17063 ZhBTc4-DS15236	None
chr1	7025713	7026622	73363	M	I	0.0147	0.0125	0.0208	None	0.0145	Enhancer4	1.176	0.697115	Pcmtd1	0.0088	0.0156	0.0181	0.0108	0.0425	0.0309	0.0139	0.0195	0.0118	0.0103	0.0193	0.0198	0.00603021	0.00636885	0.00632008	0.00674847	None	0	0	FALSE	FALSE		None
chr1	7026651	7027249	73364	None	I	0.0115	0.0097	0.0161	None	0.0104	Enhancer4	1.18557	0.645963	Pcmtd1	0.0071	0.0123	0.0133	0.0088	0.0198	0.0337	0.0126	0.0086	0.0113	0.0096	0.0101	0.0129	0.00603021	0.00636885	0.00632008	0.00674847	None	0	0	FALSE	FALSE		None
chr1	7064074	7064732	73365	IM	None	0.0192	0.0167	0.0145	None	0.0161	Other	1.1497	1.11034	Pcmtd1	0.0166	0.0153	0.0185	0.012	0.0156	0.0204	0.0174	0.0215	0.0222	0.016	0.0157	0.0168	0.00603021	0.00636885	0.00632008	0.00674847	None	0	0	FALSE	FALSE		None
chr1	7077769	7081013	73367	IM	IM	0.0523	0.0698	0.0642	None	0.0488	AllTSS2	0.749284	0.760125	Pcmtd1	0.0654	0.0749	0.0749	0.0718	0.0375	0.0653	0.0598	0.0425	0.0402	0.0429	0.0584	0.0535	0.00603021	0.00636885	0.00632008	0.00674847	cUMR	2750	8	FALSE	FALSE	mNIH_3T3-DS16900 mGER-DS15410 mGER-DS15400 mGenitalFatPad-DS18780 mA20-DS16695 m416B-DS14099 mTN-DS16171 mLiver-DS14005 m416B-DS14099 mGER-DS15410 mA20-DS16695	None
chr1	7081616	7082232	73368	M	IM	0.0172	0.0146	0.0231	None	0.0201	Enhancer4	1.17808	0.87013	Pcmtd1	0.0113	0.0192	0.0177	0.0242	0.0199	0.0226	0.0206	0.0123	0.0124	0.0196	0.0179	0.0237	0.00603021	0.00636885	0.00632008	0.00674847	None	0	0	FALSE	FALSE		None
chr1	7092522	7093095	73370	M	None	0.0192	0.0153	0.0131	None	0.0156	Other	1.2549	1.19084	Pcmtd1	0.014	0.0199	0.0131	0.0105	0.0188	0.0155	0.0198	0.018	0.0189	0.0163	0.0156	0.0138	0.00603021	0.00636885	0.00632008	0.00674847	None	0	2	FALSE	FALSE	mCerebrum-DS14024 mGenitalFatPad-DS18780	None
chr1	7093497	7093836	73371	M	None	0.0199	0.0173	0.0152	None	0.0171	Other	1.15029	1.125	Pcmtd1	0.013	0.0216	0.0231	0.012	0.0236	0.017	0.0145	0.0316	0.0228	0.016	0.0221	0.0146	0.00603021	0.00636885	0.00632008	0.00674847	None	0	0	FALSE	FALSE		None
chr1	7094116	7094495	73372	M	None	0.0186	0.0187	0.0183	None	0.016	Other	0.994652	0.874317	Pcmtd1	0.0139	0.019	0.0304	0.0152	0.0235	0.0226	0.0181	0.0183	0.0207	0.0186	0.0147	0.011	0.00603021	0.00636885	0.00632008	0.00674847	None	0	1	FALSE	FALSE	mLiver-DS14005	None
chr1	7099199	7099625	73373	I	None	0.0106	0.0226	0.0129	None	0.0091	Enhancer4	0.469027	0.705426	Pcmtd1	0.0219	0.0236	0.023	0.0119	0.0153	0.0136	0.0108	0.0084	0.0128	0.0085	0.0088	0.0106	0.00603021	0.00636885	0.00632008	0.00674847	None	0	2	FALSE	FALSE	mGER-DS15420 mFatPad-DS14021	None
chr1	7131648	7131899	73374	None	I	0.0087	0.014	0.0231	None	0.0106	Other	0.621429	0.458874	Pcmtd1	0.0103	0.0212	0.0149	0.0214	0.0327	0.0198	0.009	0.0109	0.0052	0.0092	0.0078	0.0171	0.00603021	0.00636885	0.00632008	0.00674847	None	0	1	FALSE	FALSE	m416B-DS14099	None
chr1	7169118	7169590	73375	I	None	0.0136	0.0196	0.0119	None	0.019	Other	0.693878	1.59664	Pcmtd1	0.022	0.0151	0.0188	0.0118	0.0074	0.016	0.0129	0.015	0.0138	0.0186	0.0186	0.0204	0.00603021	0.00636885	0.00632008	0.00674847	None	0	0	FALSE	FALSE		None
chr1	7194602	7195462	73377	IM	IM	0.0186	0.026	0.0296	None	0.0212	Other	0.715385	0.716216	Pcmtd1	0.0251	0.0297	0.0238	0.029	0.0347	0.027	0.0151	0.0231	0.0242	0.0201	0.0198	0.0256	0.00603021	0.00636885	0.00632008	0.00674847	None	0	1	FALSE	FALSE	CH12-DS22542	None
chr1	7196059	7197361	73378	IM	M	0.0173	0.0174	0.0118	None	0.0185	Other	0.994253	1.5678	Pcmtd1	0.0181	0.0164	0.0166	0.0123	0.0092	0.0125	0.0172	0.0181	0.017	0.0204	0.0175	0.0151	0.00603021	0.00636885	0.00632008	0.00674847	None	0	3	FALSE	FALSE	mIntestine_Large-DS19140 ZhBTc4-DS17616 ZhBTc4-DS17616 mCJ7-DS13320 mCJ7-DS13320	None
chr1	7197709	7198038	73379	M	None	0.0188	0.0124	0.0141	None	0.0178	Other	1.51613	1.26241	Pcmtd1	0.0128	0.0096	0.0149	0.0147	0.0169	0.0103	0.019	0.0145	0.0232	0.018	0.0137	0.0218	0.00603021	0.00636885	0.00632008	0.00674847	None	0	0	FALSE	FALSE		None
chr1	7198732	7199623	73380	M	M	0.0194	0.016	0.0125	None	0.0212	Other	1.2125	1.696	Pcmtd1	0.0161	0.0178	0.0134	0.0119	0.0135	0.0133	0.0181	0.0186	0.0247	0.0206	0.0237	0.0201	0.00603021	0.00636885	0.00632008	0.00674847	None	0	1	FALSE	FALSE	mGenitalFatPad-DS18780	None
chr1	7199879	7200583	73381	M	None	0.0198	0.0133	0.014	None	0.0172	Other	1.48872	1.22857	Pcmtd1	0.0129	0.0109	0.017	0.014	0.0141	0.0139	0.0192	0.0166	0.0257	0.0152	0.0256	0.0132	0.00603021	0.00636885	0.00632008	0.00674847	None	0	0	FALSE	FALSE		None
chr1	7200720	7201139	73382	M	None	0.0153	0.0124	0.0139	None	0.0154	Other	1.23387	1.10791	Pcmtd1	0.0128	0.0106	0.0134	0.0131	0.0168	0.0136	0.0143	0.0115	0.0229	0.0163	0.0116	0.0171	0.00603021	0.00636885	0.00632008	0.00674847	None	0	0	FALSE	FALSE		None
chr1	7208825	7209468	73383	None	I	0.0144	0.0146	0.0226	None	0.0151	Other	0.986301	0.668142	Pcmtd1	0.0107	0.0166	0.0225	0.0185	0.0298	0.0279	0.012	0.0142	0.0221	0.0119	0.0232	0.0143	0.00603021	0.00636885	0.00632008	0.00674847	None	0	1	FALSE	FALSE	CH12-DS22542	None
chr1	7256360	7256899	73387	M	M	0.0174	0.0159	0.0118	None	0.0212	Other	1.09434	1.79661	Pcmtd1	0.0174	0.0163	0.0117	0.0092	0.011	0.0197	0.0167	0.0169	0.02	0.023	0.0205	0.0174	0.00603021	0.00636885	0.00632008	0.00674847	None	0	0	FALSE	FALSE		None
chr1	7279006	7279264	73388	M	None	0.0219	0.0161	0.0159	None	0.0219	Other	1.36025	1.37736	Pcmtd1	0.013	0.0183	0.0212	0.0134	0.0208	0.019	0.0272	0.0151	0.0134	0.0207	0.0279	0.0186	0.00603021	0.00636885	0.00632008	0.00674847	None	0	0	FALSE	FALSE		None
chr1	7298060	7298431	73389	I	None	0.0172	0.0201	0.0117	None	0.021	Other	0.855721	1.79487	Pcmtd1	0.0224	0.0182	0.0166	0.0114	0.0043	0.0188	0.0188	0.0156	0.0141	0.0215	0.0202	0.0206	0.00603021	0.00636885	0.00632008	0.00674847	None	0	0	FALSE	FALSE		None
chr1	7299119	7300604	73390	IM	M	0.0167	0.0201	0.014	None	0.0264	Other	0.830846	1.88571	Pcmtd1	0.0261	0.0141	0.0121	0.0149	0.0122	0.0131	0.0168	0.0173	0.0156	0.0282	0.0227	0.0259	0.00603021	0.00636885	0.00632008	0.00674847	None	0	1	FALSE	FALSE	mMesoderm-DS18198	None
chr1	7301464	7302140	73391	M	None	0.0216	0.0153	0.0147	None	0.0215	Other	1.41176	1.46259	Pcmtd1	0.014	0.0147	0.0194	0.0125	0.02	0.0165	0.0215	0.0215	0.0219	0.018	0.0285	0.0228	0.00603021	0.00636885	0.00632008	0.00674847	None	0	0	FALSE	FALSE		None
chr1	7350601	7351925	73393	M	IM	0.0175	0.0152	0.0142	None	0.0168	Other	1.15132	1.1831	Pcmtd1	0.0155	0.0148	0.0151	0.0139	0.0151	0.0142	0.0185	0.0173	0.0144	0.0149	0.0228	0.0153	0.00603021	0.00636885	0.00632008	0.00674847	None	0	1	FALSE	FALSE	CH12-DS22542	None
chr1	7361635	7362139	73394	M	None	0.0189	0.0146	0.0147	None	0.0147	Other	1.29452	1	Pcmtd1	0.0161	0.0147	0.0107	0.0126	0.0137	0.0216	0.0192	0.0162	0.0213	0.0142	0.0121	0.0185	0.00603021	0.00636885	0.00632008	0.00674847	None	0	0	FALSE	FALSE		None
chr1	7365735	7367827	73396	M	None	0.0165	0.0107	0.0103	None	0.0126	Other	1.54206	1.2233	Pcmtd1	0.0098	0.012	0.0115	0.0093	0.0105	0.0132	0.0155	0.0149	0.0217	0.0121	0.0139	0.0124	0.00603021	0.00636885	0.00632008	0.00674847	None	0	0	FALSE	FALSE		None
chr1	7386795	7388928	73397	IM	IM	0.0609	0.0847	0.0943	None	0.07	AllTSS2	0.719008	0.742312	Pcmtd1	0.0814	0.0821	0.0963	0.1061	0.0543	0.0948	0.0699	0.0507	0.0445	0.07	0.0742	0.0655	0.00603021	0.00636885	0.00632008	0.00674847	cUMR	1826	6	FALSE	FALSE	mPATSKI-DS15697 mTN-DS16171 mfLiver_F5-DS20999 mTN-DS16171 mHindlimbsBuds-DS18279 mHeart-DS17909 m3134-DS8497	None
chr1	7401305	7401879	73405	M	I	0.0208	0.0141	0.0194	None	0.017	Other	1.47518	0.876289	Pcmtd1	0.0124	0.0139	0.0187	0.0182	0.0237	0.019	0.0194	0.017	0.0298	0.0142	0.02	0.0209	0.00603021	0.00636885	0.00632008	0.00674847	None	0	0	FALSE	FALSE		None
chr1	7402788	7403430	73406	None	I	0.0169	0.0129	0.0155	None	0.0131	Other	1.31008	0.845161	Pcmtd1	0.0121	0.0105	0.0178	0.0123	0.0231	0.018	0.0165	0.0137	0.0223	0.0136	0.0101	0.015	0.00603021	0.00636885	0.00632008	0.00674847	None	0	0	FALSE	FALSE		None
chr1	7404109	7405545	73407	IM	IM	0.0177	0.0159	0.0157	None	0.0168	Other	1.11321	1.07006	Pcmtd1	0.0159	0.0136	0.0187	0.0141	0.0194	0.0174	0.0163	0.0191	0.0201	0.0159	0.0186	0.0174	0.00603021	0.00636885	0.00632008	0.00674847	None	0	1	FALSE	FALSE	mTN-DS16171	None
chr1	7478798	7479861	73408	IM	None	0.0199	0.0171	0.0134	None	0.0166	Other	1.16374	1.23881	Pcmtd1	0.0155	0.0186	0.0194	0.0136	0.0133	0.0128	0.0178	0.0267	0.0184	0.0128	0.0191	0.0235	0.00603021	0.00636885	0.00632008	0.00674847	None	0	0	FALSE	FALSE		None
chr1	7515759	7516600	73413	M	None	0.0195	0.012	0.0119	None	0.0133	Other	1.625	1.11765	Pcmtd1	0.0093	0.0167	0.0136	0.01	0.0148	0.0148	0.0188	0.0181	0.0235	0.0135	0.0143	0.0114	0.00603021	0.00636885	0.00632008	0.00674847	None	0	0	FALSE	FALSE		None
chr1	7517676	7518246	73414	M	None	0.017	0.0077	0.0108	None	0.0107	Other	2.20779	0.990741	Pcmtd1	0.0045	0.013	0.0096	0.009	0.0136	0.0136	0.0188	0.0137	0.0153	0.011	0.0109	0.0099	0.00603021	0.00636885	0.00632008	0.00674847	None	0	0	FALSE	FALSE		None
chr1	7533495	7534157	73415	None	I	0.0142	0.0104	0.0164	None	0.0101	Other	1.36538	0.615854	Pcmtd1	0.0078	0.0132	0.0133	0.0159	0.0206	0.0142	0.0145	0.0125	0.0156	0.0095	0.0085	0.0132	0.00603021	0.00636885	0.00632008	0.00674847	None	0	1	FALSE	FALSE	CH12-DS22542	None
chr1	7635092	7635867	73424	IM	IM	0.027	0.03	0.0262	None	0.02	Other	0.9	0.763359	Pcmtd1	0.0271	0.0372	0.029	0.0303	0.0203	0.0198	0.0321	0.0167	0.0229	0.0195	0.0207	0.0206	0.00603021	0.00636885	0.00632008	0.00674847	None	0	0	FALSE	FALSE		None
chr1	7757963	7758974	73436	M	None	0.0159	0.0099	0.0105	None	0.0108	Other	1.60606	1.02857	Pcmtd1	0.0073	0.0142	0.0116	0.0083	0.0123	0.0149	0.0174	0.0142	0.0131	0.011	0.0097	0.0117	0.00603021	0.00636885	0.00632008	0.00674847	None	0	0	FALSE	FALSE		None
chr1	7771903	7773145	73441	M	None	0.0162	0.0105	0.0102	None	0.012	Other	1.54286	1.17647	Pcmtd1	0.0096	0.0135	0.0095	0.0103	0.0061	0.0133	0.0162	0.0162	0.016	0.0104	0.0124	0.0158	0.00603021	0.00636885	0.00632008	0.00674847	None	0	0	FALSE	FALSE		None
chr1	8064416	8065123	73460	M	None	0.0167	0.0083	0.01	None	0.0126	Other	2.01205	1.26	Pcmtd1	0.0073	0.012	0.0066	0.0091	0.0136	0.0096	0.0182	0.016	0.0125	0.0133	0.0103	0.0135	0.00603021	0.00636885	0.00632008	0.00674847	None	0	0	FALSE	FALSE		None
chr1	8197181	8197888	73477	M	None	0.0143	0.008	0.0075	None	0.0094	Other	1.7875	1.25333	Pcmtd1	0.0065	0.0094	0.0102	0.0076	0.0058	0.0089	0.0135	0.0142	0.017	0.0106	0.0067	0.0094	0.00603021	0.00636885	0.00632008	0.00674847	None	0	0	FALSE	FALSE		None
chr1	8458315	8459349	73495	None	M	0.0123	0.0144	0.0092	None	0.0136	AllTSS2	0.854167	1.47826	Sntg1	0.0153	0.0109	0.0165	0.0108	0.0065	0.007	0.0124	0.0132	0.0112	0.0144	0.0114	0.0137	0.00603021	0.00636885	0.00632008	0.00674847	None	0	2	FALSE	FALSE	mESC_F4WT-DS17060 mCerebrum-DS14024	None
chr1	8517905	8519011	73502	M	None	0.0168	0.009	0.011	None	0.0124	Other	1.86667	1.12727	Sntg1	0.0082	0.0118	0.0079	0.0095	0.0107	0.0155	0.0169	0.0159	0.0175	0.0116	0.0076	0.0197	0.00603021	0.00636885	0.00632008	0.00674847	None	0	0	FALSE	FALSE		None
chr1	8749122	8749628	73523	M	None	0.0134	0.006	0.0064	None	0.006	Other	2.23333	0.9375	Sntg1	0.0041	0.0115	0.0043	0.007	0.0064	0.0047	0.0121	0.0108	0.0208	0.006	0.0044	0.0077	0.00603021	0.00636885	0.00632008	0.00674847	None	0	0	FALSE	FALSE		None
chr1	8750303	8750663	73524	None	I	0.0129	0.0108	0.0148	None	0.0124	Other	1.19444	0.837838	Sntg1	0.0082	0.0151	0.0123	0.0159	0.0112	0.0149	0.0136	0.0093	0.0151	0.0141	0.0072	0.0135	0.00603021	0.00636885	0.00632008	0.00674847	None	0	1	FALSE	FALSE	E14-DS21450	None
chr1	8810381	8811357	73529	None	M	0.0136	0.0121	0.0099	None	0.0156	Other	1.12397	1.57576	Sntg1	0.014	0.0097	0.0099	0.0103	0.0115	0.0073	0.0145	0.0113	0.0138	0.019	0.0093	0.014	0.00603021	0.00636885	0.00632008	0.00674847	None	0	0	FALSE	FALSE		None
chr1	8811386	8811893	73530	None	M	0.0133	0.0112	0.0119	None	0.0158	Other	1.1875	1.32773	Sntg1	0.0133	0.0107	0.0065	0.0105	0.0138	0.0142	0.0158	0.0105	0.0089	0.0162	0.0113	0.0196	0.00603021	0.00636885	0.00632008	0.00674847	None	0	0	FALSE	FALSE		None
chr1	8840446	8841594	73531	M	None	0.0181	0.0107	0.0121	None	0.0149	Other	1.69159	1.2314	Sntg1	0.0081	0.0138	0.0135	0.0121	0.009	0.0146	0.0184	0.0119	0.0247	0.0145	0.0167	0.0138	0.00603021	0.00636885	0.00632008	0.00674847	None	0	0	FALSE	FALSE		None
chr1	9210848	9211295	73557	M	None	0.0183	0.0112	0.0132	None	0.0145	Other	1.63393	1.09848	Sntg1	0.0114	0.0102	0.0118	0.0115	0.0132	0.0179	0.0218	0.0132	0.0131	0.0191	0.0079	0.0101	0.00603021	0.00636885	0.00632008	0.00674847	None	0	0	FALSE	FALSE		None
chr1	9221087	9221678	73558	M	None	0.0144	0.0097	0.0082	None	0.0107	Other	1.48454	1.30488	Sntg1	0.0086	0.0137	0.0077	0.0067	0.0073	0.0129	0.0119	0.0113	0.0258	0.0096	0.0113	0.0128	0.00603021	0.00636885	0.00632008	0.00674847	None	0	0	FALSE	FALSE		None
chr1	9286986	9287400	73560	M	None	0.0186	0.0149	0.0101	None	0.0075	Other	1.24832	0.742574	Sntg1	0.0109	0.021	0.018	0.0111	0.0078	0.0092	0.0231	0.0121	0.0122	0.0098	0.0057	0.0038	0.00603021	0.00636885	0.00632008	0.00674847	None	0	1	FALSE	FALSE	mBrain-DS12727	None
chr1	9288041	9290424	73561	IM	IM	0.0223	0.0243	0.013	None	0.021	AllTSS2	0.917695	1.61538	Sntg1	0.0286	0.0184	0.0201	0.0133	0.0109	0.0137	0.0244	0.0216	0.0166	0.0209	0.0223	0.0198	0.00603021	0.00636885	0.00632008	0.00674847	cUMR	2472	6	FALSE	FALSE	mRetina-DS19060 mMesoderm-DS18198 mCerebrum-DS14024 mHindlimbsBuds-DS18279 mCerebrum-DS14024 mBrain-DS12727 mCD1-DS17129	None
chr1	9290527	9291041	73562	M	None	0.0176	0.0137	0.0083	None	0.0087	Other	1.28467	1.04819	Adhfe1	0.0132	0.0189	0.0088	0.0073	0.0144	0.0063	0.0188	0.014	0.0182	0.0082	0.0103	0.0082	0.00603021	0.00636885	0.00632008	0.00674847	cUMR	2472	1	FALSE	FALSE	mfBrain-DS14536	None
chr1	9291266	9292446	73563	IM	M	0.0226	0.0159	0.0107	None	0.0172	Other	1.42138	1.60748	Adhfe1	0.0147	0.0176	0.0167	0.0109	0.0116	0.0095	0.024	0.0228	0.0181	0.0164	0.02	0.0162	0.00603021	0.00636885	0.00632008	0.00674847	None	0	0	FALSE	FALSE		None
chr1	9301415	9301690	73564	None	M	0.0176	0.0139	0.0114	None	0.02	Other	1.26619	1.75439	Adhfe1	0.0128	0.0183	0.0116	0.0126	0.0114	0.0082	0.017	0.0157	0.022	0.0173	0.0199	0.0265	0.00603021	0.00636885	0.00632008	0.00674847	None	0	0	FALSE	FALSE		None
chr1	9301895	9302343	73565	None	M	0.0131	0.0104	0.0082	None	0.0159	Other	1.25962	1.93902	Adhfe1	0.0083	0.0151	0.0103	0.0085	0.0085	0.0073	0.012	0.0147	0.015	0.0139	0.0201	0.0163	0.00603021	0.00636885	0.00632008	0.00674847	None	0	0	FALSE	FALSE		None
chr1	9305529	9306393	73566	M	I	0.0178	0.0136	0.0154	None	0.016	Other	1.30882	1.03896	Adhfe1	0.0114	0.0164	0.0159	0.0146	0.0163	0.0172	0.016	0.0174	0.0241	0.0144	0.0187	0.0173	0.00603021	0.00636885	0.00632008	0.00674847	None	0	1	FALSE	FALSE	mKidney-DS13948	None
chr1	9372416	9373886	73572	IM	M	0.0202	0.0161	0.0145	None	0.0172	Other	1.25466	1.18621	Adhfe1	0.0145	0.017	0.0194	0.0134	0.017	0.0156	0.0197	0.021	0.0206	0.0165	0.0178	0.0185	0.00603021	0.00636885	0.00632008	0.00674847	None	0	0	FALSE	FALSE		None
chr1	9389022	9389704	73574	M	None	0.0202	0.0121	0.0124	None	0.0135	Other	1.66942	1.08871	Adhfe1	0.0104	0.0164	0.0112	0.0119	0.0191	0.0083	0.0222	0.0195	0.0149	0.0111	0.0177	0.0152	0.00603021	0.00636885	0.00632008	0.00674847	None	0	0	FALSE	FALSE		None
chr1	9459182	9460080	73580	I	M	0.0153	0.0184	0.0132	None	0.025	Other	0.831522	1.89394	Adhfe1	0.0203	0.0162	0.0161	0.0129	0.0107	0.0161	0.0144	0.0165	0.0169	0.0265	0.0236	0.023	0.00603021	0.00636885	0.00632008	0.00674847	None	0	2	FALSE	FALSE	ZhBTc4-DS17616 ZhBTc4-DS15236	None
chr1	9467855	9468338	73581	M	None	0.0212	0.0181	0.0115	None	0.0181	Other	1.17127	1.57391	Adhfe1	0.0181	0.0186	0.0175	0.0105	0.0103	0.0152	0.0214	0.0175	0.0251	0.0173	0.0184	0.0201	0.00603021	0.00636885	0.00632008	0.00674847	None	0	0	FALSE	FALSE		None
chr1	9505466	9506066	73582	M	None	0.0215	0.0135	0.0107	None	0.0143	Other	1.59259	1.33645	Adhfe1	0.015	0.0129	0.0106	0.0099	0.009	0.0145	0.0245	0.0198	0.0143	0.0146	0.0143	0.0135	0.00603021	0.00636885	0.00632008	0.00674847	None	0	0	FALSE	FALSE		None
chr1	9526306	9526916	73583	I	None	0.0162	0.0253	0.0141	None	0.022	Enhancer4	0.640316	1.56028	Adhfe1	0.0273	0.0207	0.0256	0.0138	0.0141	0.0146	0.0162	0.02	0.0118	0.0243	0.0182	0.02	0.00603021	0.00636885	0.00632008	0.00674847	None	0	0	FALSE	FALSE		None
chr1	9531153	9531818	73584	I	I	0.011	0.0186	0.0284	None	0.0153	Other	0.591398	0.538732	Adhfe1	0.0177	0.0153	0.025	0.0207	0.0463	0.0351	0.0096	0.0127	0.0133	0.0108	0.0195	0.0221	0.00603021	0.00636885	0.00632008	0.00674847	None	0	1	FALSE	FALSE	mPATSKI-DS15697	None
chr1	9541700	9541953	73586	I	None	0.0212	0.024	0.0174	None	0.0227	Other	0.883333	1.3046	Adhfe1	0.0262	0.0281	0.0136	0.0174	0.0186	0.0164	0.0207	0.0206	0.0234	0.0213	0.0247	0.0239	0.00603021	0.00636885	0.00632008	0.00674847	None	0	0	FALSE	FALSE		None
chr1	9546293	9546714	73587	M	None	0.0224	0.0164	0.0149	None	0.0177	Other	1.36585	1.18792	Adhfe1	0.0149	0.0156	0.0214	0.0155	0.0166	0.0116	0.0196	0.0248	0.0286	0.0176	0.0179	0.0178	0.00603021	0.00636885	0.00632008	0.00674847	None	0	0	FALSE	FALSE		None
chr1	9546923	9547812	73588	IM	M	0.0248	0.0211	0.0181	None	0.025	Other	1.17536	1.38122	Adhfe1	0.023	0.0205	0.0168	0.0155	0.0242	0.0203	0.023	0.0286	0.0259	0.0246	0.027	0.0241	0.00603021	0.00636885	0.00632008	0.00674847	None	0	0	FALSE	FALSE		None
chr1	9554482	9554896	73589	I	M	0.0191	0.025	0.0221	None	0.0273	Other	0.764	1.23529	Adhfe1 2610203C22Rik	0.0304	0.0191	0.0181	0.0232	0.0194	0.0215	0.0208	0.0159	0.0174	0.029	0.0251	0.0254	0.00603021	0.00636885	0.00632008	0.00674847	None	0	1	FALSE	FALSE	mFibroblast-DS10088	None
chr1	9556516	9557077	73590	IM	None	0.0233	0.0242	0.019	None	0.0235	Other	0.96281	1.23684	Adhfe1 2610203C22Rik	0.024	0.0236	0.025	0.0181	0.019	0.0214	0.0218	0.0278	0.0228	0.0243	0.0249	0.0202	0.00603021	0.00636885	0.00632008	0.00674847	None	0	0	FALSE	FALSE		None
chr1	9557438	9558136	73591	M	None	0.0225	0.0201	0.0187	None	0.0192	Other	1.1194	1.02674	Adhfe1 2610203C22Rik	0.0182	0.0228	0.0215	0.0166	0.021	0.0228	0.0239	0.0194	0.0215	0.0195	0.0187	0.0189	0.00603021	0.00636885	0.00632008	0.00674847	None	0	1	FALSE	FALSE	mKidney-DS13948	None
chr1	9563055	9563917	73592	I	I	0.0199	0.0336	0.037	None	0.0196	Enhancer4	0.592262	0.52973	Adhfe1 2610203C22Rik	0.0272	0.041	0.0412	0.0358	0.0341	0.0428	0.0178	0.0223	0.0236	0.0179	0.0231	0.02	0.00603021	0.00636885	0.00632008	0.00674847	None	0	1	FALSE	FALSE	mPATSKI-DS15697	None
chr1	9602202	9604193	73593	IM	M	0.0275	0.0283	0.0162	None	0.027	Other	0.971731	1.66667	2610203C22Rik 3110035E14Rik	0.0329	0.0218	0.0241	0.0166	0.0178	0.0139	0.0294	0.025	0.0243	0.0227	0.0365	0.0276	0.00603021	0.00636885	0.00632008	0.00674847	None	0	0	FALSE	FALSE		None
chr1	9605048	9605684	73594	M	None	0.0211	0.0148	0.0117	None	0.0134	Other	1.42568	1.1453	2610203C22Rik 3110035E14Rik	0.0132	0.0167	0.0168	0.0116	0.0088	0.0144	0.0258	0.0152	0.0132	0.0115	0.0152	0.0163	0.00603021	0.00636885	0.00632008	0.00674847	None	0	1	FALSE	FALSE	mCerebrum-DS14024	None
chr1	9606013	9607531	73595	IM	M	0.0251	0.0222	0.0157	None	0.0242	Other	1.13063	1.5414	2610203C22Rik 3110035E14Rik	0.0225	0.0198	0.0244	0.0164	0.0177	0.0119	0.0251	0.0258	0.0244	0.023	0.0249	0.0264	0.00603021	0.00636885	0.00632008	0.00674847	None	0	1	FALSE	FALSE	mCerebrum-DS14024	None
chr1	9609555	9610352	73596	M	None	0.0258	0.0228	0.0194	None	0.0197	Other	1.13158	1.01546	2610203C22Rik 3110035E14Rik	0.02	0.0226	0.0303	0.0201	0.0189	0.0176	0.0268	0.0259	0.0224	0.0166	0.0236	0.0233	0.00603021	0.00636885	0.00632008	0.00674847	None	0	2	FALSE	FALSE	mCerebrum-DS14024 mMesoderm-DS18198	None
chr1	9611117	9612453	73597	IM	IM	0.026	0.0272	0.0208	None	0.0234	Other	0.955882	1.125	2610203C22Rik 3110035E14Rik	0.0265	0.0285	0.0275	0.021	0.0197	0.0214	0.0248	0.0282	0.0273	0.0216	0.0197	0.0318	0.00603021	0.00636885	0.00632008	0.00674847	None	0	2	FALSE	FALSE	mPATSKI-DS15697 mA20-DS16695	None
chr1	9612684	9613327	73598	M	None	0.0241	0.0219	0.0136	None	0.0203	Other	1.10046	1.49265	2610203C22Rik 3110035E14Rik	0.0211	0.0285	0.0161	0.0137	0.0102	0.0161	0.0216	0.0293	0.0257	0.0197	0.0191	0.0228	0.00603021	0.00636885	0.00632008	0.00674847	None	0	2	FALSE	FALSE	mBrain-DS12727 mPATSKI-DS15697	None
chr1	9616046	9616917	73599	M	None	0.0238	0.0195	0.0156	None	0.0191	Other	1.22051	1.22436	2610203C22Rik 3110035E14Rik	0.0223	0.0168	0.0156	0.0148	0.0137	0.0192	0.0248	0.0209	0.0238	0.0173	0.0225	0.0197	0.00603021	0.00636885	0.00632008	0.00674847	None	0	0	FALSE	FALSE		None
chr1	9617221	9618025	73600	IM	M	0.0232	0.0224	0.0153	None	0.0288	Other	1.03571	1.88235	2610203C22Rik 3110035E14Rik	0.0246	0.0188	0.021	0.0137	0.0172	0.0181	0.0235	0.025	0.0199	0.0274	0.0287	0.0324	0.00603021	0.00636885	0.00632008	0.00674847	None	0	3	FALSE	FALSE	m3134-DS8497 mPATSKI-DS15697 mCerebrum-DS14024	None
chr1	9618587	9620365	73601	I	M	0.0193	0.0251	0.0203	None	0.0268	Other	0.768924	1.3202	2610203C22Rik	0.026	0.0202	0.0285	0.0203	0.023	0.0181	0.0178	0.0219	0.0211	0.0277	0.0276	0.0237	0.00603021	0.00636885	0.00632008	0.00674847	None	0	5	FALSE	FALSE	mA20-DS16695 mCJ7-DS13320 mPATSKI-DS15697 mCerebrum-DS14024 mCerebellum-DS14034	None
chr1	9626989	9627468	73602	None	I	0.0134	0.0134	0.0153	None	0.0138	Enhancer4	1	0.901961	Mybl1	0.0098	0.0179	0.0175	0.0158	0.0138	0.0153	0.0151	0.0121	0.0096	0.0136	0.0101	0.0184	0.00603021	0.00636885	0.00632008	0.00674847	None	0	0	FALSE	FALSE		None
chr1	9628881	9629132	73603	M	None	0.0245	0.0166	0.0195	None	0.0185	Enhancer4	1.4759	0.948718	Mybl1	0.017	0.0177	0.0144	0.0175	0.0264	0.0192	0.0239	0.0242	0.0267	0.0198	0.017	0.0169	0.00603021	0.00636885	0.00632008	0.00674847	None	0	2	FALSE	FALSE	mLiver-DS14005 mGenitalFatPad-DS18780	None
chr1	9634826	9635404	73604	M	None	0.0231	0.0178	0.0156	None	0.0198	Other	1.29775	1.26923	Mybl1	0.0183	0.0147	0.0201	0.0148	0.0159	0.0174	0.0201	0.0198	0.0362	0.0182	0.023	0.0202	0.00603021	0.00636885	0.00632008	0.00674847	None	0	1	FALSE	FALSE	mCerebrum-DS14024	None
chr1	9635898	9636631	73605	IM	None	0.0234	0.0242	0.016	None	0.0188	Other	0.966942	1.175	Mybl1	0.023	0.0201	0.0319	0.0155	0.0132	0.02	0.0236	0.0224	0.0239	0.0192	0.0169	0.02	0.00603021	0.00636885	0.00632008	0.00674847	None	0	1	FALSE	FALSE	mCerebrum-DS14024	None
chr1	9637458	9637947	73606	IM	None	0.0206	0.0241	0.0173	None	0.0179	Other	0.854772	1.03468	Mybl1	0.0272	0.0199	0.0213	0.0178	0.0231	0.0111	0.0193	0.0205	0.0248	0.0141	0.0304	0.0144	0.00603021	0.00636885	0.00632008	0.00674847	None	0	0	FALSE	FALSE		None
chr1	9638846	9639136	73607	M	None	0.0223	0.0215	0.014	None	0.0224	Other	1.03721	1.6	Mybl1	0.0255	0.0163	0.0174	0.0133	0.0112	0.0183	0.02	0.0227	0.0289	0.0223	0.02	0.0253	0.00603021	0.00636885	0.00632008	0.00674847	None	0	1	FALSE	FALSE	mMesoderm-DS18198	None
chr1	9639259	9639740	73608	None	M	0.018	0.0224	0.0169	None	0.0249	Other	0.803571	1.47337	Mybl1	0.0269	0.015	0.0196	0.0184	0.0148	0.0143	0.0181	0.0181	0.0176	0.0304	0.0208	0.0154	0.00603021	0.00636885	0.00632008	0.00674847	None	0	2	FALSE	FALSE	mMesoderm-DS18198 mLung-DS14479	None
chr1	9686946	9687255	73609	None	I	0.0096	0.0162	0.028	None	0.0085	Enhancer4	0.592593	0.303571	Mybl1	0.0164	0.0172	0.0146	0.0318	0.02	0.0241	0.0081	0.0125	0.0107	0.0065	0.0077	0.0142	0.00603021	0.00636885	0.00632008	0.00674847	None	0	1	FALSE	FALSE	mPATSKI-DS15697	None
chr1	9689829	9691302	73610	IM	IM	0.0394	0.0836	0.0653	None	0.0408	AllTSS2	0.471292	0.624809	Mybl1	0.1112	0.052	0.0503	0.079	0.0312	0.0554	0.0468	0.0256	0.0325	0.0428	0.0425	0.0343	0.00603021	0.00636885	0.00632008	0.00674847	cUMR	1964	4	FALSE	FALSE	mfLiver_F3-DS20937 m3134-DS8497 m3134-DS8497 m3134-DS8497 ZhBTc4-DS17616 mA20-DS16695	None
chr1	9693102	9693678	73611	I	I	0.0116	0.0211	0.0302	None	0.014	Enhancer4	0.549763	0.463576	Mybl1	0.0226	0.0208	0.0179	0.0285	0.0393	0.0275	0.0113	0.0113	0.0132	0.0095	0.0176	0.0216	0.00603021	0.00636885	0.00632008	0.00674847	None	0	1	FALSE	FALSE	mGER-DS15420	None
chr1	9726784	9727497	73612	IM	None	0.0193	0.0245	0.0142	None	0.0135	Other	0.787755	0.950704	Vcpip1	0.0243	0.0252	0.0244	0.0152	0.0145	0.0109	0.0202	0.017	0.0196	0.0089	0.022	0.0159	0.00603021	0.00636885	0.00632008	0.00674847	None	0	0	FALSE	FALSE		None
chr1	9734719	9735540	73613	IM	I	0.019	0.0283	0.0499	None	0.0154	AllTSS2	0.671378	0.308617	Vcpip1	0.0192	0.0345	0.0444	0.0617	0.0332	0.0308	0.0206	0.0165	0.017	0.0135	0.013	0.0224	0.00603021	0.00636885	0.00632008	0.00674847	None	0	2	FALSE	FALSE	mPATSKI-DS15697 mGER-DS15420	None
chr1	9735549	9736152	73614	M	None	0.0193	0.0159	0.0218	None	0.0129	Other	1.21384	0.591743	Vcpip1	0.0151	0.0162	0.0175	0.0276	0.0142	0.0122	0.0242	0.0159	0.0078	0.0126	0.0105	0.0163	0.00603021	0.00636885	0.00632008	0.00674847	None	0	2	FALSE	FALSE	mfLiver_F2-DS20994 mA20-DS16695	None
chr1	9736432	9739137	73615	IM	IM	0.0483	0.0701	0.0827	I	0.0483	AllTSS2	0.689016	0.584039	Vcpip1 1700034P13Rik	0.0664	0.0697	0.08	0.0911	0.0516	0.085	0.0539	0.0418	0.0382	0.0401	0.0631	0.053	0.00603021	0.00636885	0.00632008	0.00674847	cUMR	1659	6	FALSE	FALSE	mfLiver_F3-DS20937 mGER-DS15420 mfLiver_F3-DS20937 mfLiver-DS20666 mLiver-DS14005 mLiver-DS14005 mMesoderm-DS18198 mA20-DS16695 mLiver-DS14005	None
chr1	9757645	9757936	73616	M	None	0.0196	0.0133	0.0121	None	0.0183	Other	1.47368	1.5124	1700034P13Rik	0.0151	0.0072	0.0159	0.0112	0.0114	0.0149	0.0225	0.0162	0.0142	0.015	0.0195	0.0251	0.00603021	0.00636885	0.00632008	0.00674847	None	0	0	FALSE	FALSE		None
chr1	9758290	9760972	73617	IM	M	0.0226	0.0234	0.0131	None	0.019	Other	0.965812	1.45038	1700034P13Rik	0.0279	0.0184	0.0179	0.0144	0.0119	0.0105	0.0249	0.02	0.0188	0.0166	0.0242	0.0198	0.00603021	0.00636885	0.00632008	0.00674847	None	0	6	FALSE	FALSE	ZhBTc4-DS15236 mESC_FIKO-DS17063 mCD1-DS17129 ZhBTc4-DS17616 m416B-DS14099 mESC_F4WT-DS17060	None
chr1	9762668	9763483	73618	I	I	0.0154	0.0252	0.0345	None	0.012	Enhancer4	0.611111	0.347826	Vcpip1	0.0206	0.0296	0.0316	0.035	0.0389	0.0295	0.0145	0.0172	0.016	0.0094	0.0132	0.0172	0.00603021	0.00636885	0.00632008	0.00674847	None	0	3	FALSE	FALSE	mfLiver_F3-DS20937 mPATSKI-DS15697 mfLiver_F5-DS20999	None
chr1	9766061	9766930	73619	I	None	0.0124	0.03	0.0176	IM	0.013	Enhancer4	0.413333	0.738636	Vcpip1	0.023	0.0347	0.0424	0.0155	0.0182	0.0232	0.0111	0.0156	0.0126	0.0123	0.0149	0.0129	0.00603021	0.00636885	0.00632008	0.00674847	None	0	3	FALSE	FALSE	CH12-DS22542 mfLiver-DS19246 mfLiver_F1-DS20991	None
chr1	9770208	9771015	73620	IM	IM	0.0156	0.032	0.0426	I	0.0169	Enhancer4	0.4875	0.396714	Vcpip1	0.0306	0.0352	0.0318	0.0371	0.0389	0.0613	0.0125	0.0186	0.022	0.0133	0.0208	0.0215	0.00603021	0.00636885	0.00632008	0.00674847	None	0	1	FALSE	FALSE	mfLiver-DS19246	None
chr1	9773722	9774523	73621	None	I	0.0139	0.0156	0.0196	None	0.0121	Enhancer4	0.891026	0.617347	Vcpip1	0.0137	0.0159	0.0203	0.0185	0.0268	0.0169	0.013	0.0193	0.0105	0.0117	0.0109	0.0144	0.00603021	0.00636885	0.00632008	0.00674847	None	0	1	FALSE	FALSE	mfLiver_F5-DS20999 mfLiver_F5-DS20999 mfLiver_F5-DS20999	None
chr1	9787616	9788919	73622	IM	IM	0.0218	0.0454	0.0262	None	0.0233	AllTSS2	0.480176	0.889313	Sgk3	0.0591	0.03	0.0286	0.0281	0.0177	0.0281	0.0247	0.0176	0.0173	0.0272	0.0182	0.019	0.00603021	0.00636885	0.00632008	0.00674847	cUMR	2188	7	FALSE	FALSE	MEL-DS13036 mfLiver_F5-DS20999 m3134-DS8497 mMesoderm-DS18198 mCD19-DS16168 mfLiver_F3-DS20937 mThymus-DS18819	None
chr1	9789024	9789408	73623	None	I	0.0128	0.0214	0.0285	None	0.0175	AllTSS2	0.598131	0.614035	Sgk3	0.0255	0.0146	0.0191	0.0328	0.0203	0.0233	0.0155	0.0115	0.0055	0.0196	0.0129	0.0169	0.00603021	0.00636885	0.00632008	0.00674847	cUMR	2188	3	FALSE	FALSE	mPATSKI-DS15697 mfLiver_F5-DS20999 mGenitalFatPad-DS18780	None
chr1	9795977	9796446	73624	None	I	0.0111	0.0185	0.0292	None	0.0149	Enhancer4	0.6	0.510274	Sgk3	0.0213	0.0152	0.0152	0.0364	0.0204	0.0163	0.0111	0.0098	0.0129	0.0161	0.0121	0.0147	0.00603021	0.00636885	0.00632008	0.00674847	None	0	1	FALSE	FALSE	m416B-DS14099	None
chr1	9801978	9802267	73625	M	None	0.0216	0.0201	0.0175	None	0.0169	Enhancer4	1.07463	0.965714	Sgk3	0.0163	0.0263	0.0223	0.017	0.0167	0.0198	0.0179	0.0282	0.0256	0.0141	0.0148	0.0262	0.00603021	0.00636885	0.00632008	0.00674847	None	0	0	FALSE	FALSE		None
chr1	9805174	9805553	73626	None	I	0.0074	0.0102	0.0272	None	0.0071	Enhancer4	0.72549	0.261029	Sgk3	0.0059	0.0175	0.0126	0.0231	0.0209	0.0443	0.0083	0.0083	0.0034	0.0046	0.0146	0.0056	0.00603021	0.00636885	0.00632008	0.00674847	None	0	2	FALSE	FALSE	mfLiver_F2-DS20994 mfLiver_F5-DS20999	None
chr1	9815827	9816318	73627	None	I	0.0096	0.0123	0.0261	None	0.011	Enhancer4	0.780488	0.421456	Sgk3	0.0137	0.0119	0.0091	0.0322	0.0176	0.0162	0.0104	0.0073	0.0095	0.0138	0.0083	0.0071	0.00603021	0.00636885	0.00632008	0.00674847	None	0	2	FALSE	FALSE	m416B-DS14099 mPATSKI-DS15697	None
chr1	9823016	9824551	73628	IM	IM	0.0192	0.0323	0.0598	I	0.0238	Enhancer4	0.594427	0.397993	Sgk3	0.0272	0.0351	0.0418	0.0636	0.0522	0.0554	0.0175	0.0236	0.0195	0.0206	0.0294	0.0258	0.00603021	0.00636885	0.00632008	0.00674847	None	0	1	FALSE	FALSE	mGER-DS15420 mGER-DS15420	None
chr1	9836493	9837057	73629	M	None	0.0218	0.0193	0.0137	None	0.0153	Enhancer4	1.12953	1.11679	Sgk3	0.0209	0.0193	0.0152	0.0152	0.0088	0.0135	0.0248	0.0197	0.0146	0.0118	0.0209	0.0181	0.00603021	0.00636885	0.00632008	0.00674847	None	0	1	FALSE	FALSE	mA20-DS16695	None
chr1	9837464	9840281	73630	IM	IM	0.0255	0.0314	0.0218	None	0.023	AllTSS2	0.812102	1.05505	Sgk3	0.0335	0.0318	0.0258	0.0241	0.0163	0.0199	0.026	0.0249	0.0247	0.0189	0.0296	0.0264	0.00603021	0.00636885	0.00632008	0.00674847	cUMR	1265	7	FALSE	FALSE	mfLiver-DS20666 mThymus-DS18819 mESC_F4WT-DS17060 mTR-DS17864 mTN-DS16171 mPATSKI-DS15697 mMesoderm-DS18198 mThymus-DS18819 mTN-DS16171	None
chr1	9840686	9841085	73631	IM	None	0.0211	0.0259	0.0208	None	0.0166	Enhancer4	0.814672	0.798077	Sgk3	0.0256	0.026	0.0264	0.0196	0.026	0.02	0.0207	0.024	0.0191	0.0166	0.0179	0.0154	0.00603021	0.00636885	0.00632008	0.00674847	None	0	1	FALSE	FALSE	mfLiver_F2-DS20994	None
chr1	9841249	9842163	73632	M	None	0.0239	0.0166	0.0176	None	0.0151	Enhancer4	1.43976	0.857955	Sgk3	0.0152	0.0196	0.0169	0.0175	0.0188	0.017	0.0283	0.0187	0.0161	0.0146	0.0138	0.0177	0.00603021	0.00636885	0.00632008	0.00674847	None	0	0	FALSE	FALSE		None
chr1	9842819	9843395	73633	I	None	0.0153	0.0263	0.0172	None	0.0162	Enhancer4	0.581749	0.94186	Sgk3	0.0284	0.0228	0.0252	0.0178	0.0147	0.0177	0.0167	0.0129	0.0136	0.0162	0.0208	0.0114	0.00603021	0.00636885	0.00632008	0.00674847	None	0	0	FALSE	FALSE		None
chr1	9849321	9849573	73634	I	None	0.0176	0.0239	0.0199	None	0.0189	Enhancer4	0.736402	0.949749	Sgk3	0.0219	0.0194	0.0339	0.0195	0.0248	0.0171	0.0158	0.0202	0.0205	0.0162	0.0305	0.0132	0.00603021	0.00636885	0.00632008	0.00674847	None	0	2	FALSE	FALSE	CH12-DS22542 mB-DS17866	None
chr1	9850887	9852173	73635	I	I	0.015	0.0182	0.0142	None	0.0122	Enhancer4	0.824176	0.859155	Sgk3	0.0179	0.0167	0.0206	0.0145	0.0131	0.0145	0.0139	0.013	0.0206	0.0113	0.0134	0.0134	0.00603021	0.00636885	0.00632008	0.00674847	None	0	1	FALSE	FALSE	mGER-DS15420	None
chr1	9895934	9896659	73637	M	None	0.0214	0.0193	0.0156	None	0.0168	Other	1.10881	1.07692	6030422M02Rik	0.0176	0.0185	0.0249	0.0147	0.0197	0.0148	0.0241	0.0186	0.0162	0.0124	0.0241	0.0198	0.00603021	0.00636885	0.00632008	0.00674847	None	0	0	FALSE	FALSE		None
chr1	9896701	9898428	73638	IM	M	0.0281	0.0243	0.0173	None	0.0207	Other	1.15638	1.19653	6030422M02Rik	0.0223	0.0267	0.0265	0.0182	0.0172	0.015	0.0275	0.0293	0.0286	0.0171	0.0269	0.0233	0.00603021	0.00636885	0.00632008	0.00674847	None	0	1	FALSE	FALSE	mLiver-DS14005	None
chr1	9898432	9899828	73639	IM	M	0.0294	0.0281	0.0155	None	0.0245	AllTSS2	1.04626	1.58065	6030422M02Rik	0.0316	0.024	0.0241	0.0158	0.0168	0.0138	0.03	0.0275	0.0296	0.0218	0.0311	0.0241	0.00603021	0.00636885	0.00632008	0.00674847	None	0	3	FALSE	FALSE	mBrain-DS12727 mCD19-DS16168 ZhBTc4-DS17616	None
chr1	9900045	9900730	73640	M	None	0.0235	0.0183	0.0161	None	0.0155	Enhancer4	1.28415	0.962733	6030422M02Rik	0.0159	0.0243	0.0175	0.0165	0.0192	0.0124	0.0275	0.0138	0.0223	0.0136	0.0156	0.0199	0.00603021	0.00636885	0.00632008	0.00674847	None	0	0	FALSE	FALSE		None
chr1	9929259	9930308	73641	None	I	0.0177	0.0169	0.0285	None	0.0191	Enhancer4	1.04734	0.670175	6030422M02Rik	0.0157	0.0188	0.0176	0.0276	0.022	0.0364	0.0183	0.019	0.014	0.0173	0.0215	0.0211	0.00603021	0.00636885	0.00632008	0.00674847	None	0	3	FALSE	FALSE	MEL-DS13036 mGER-DS15400 mESC_F4WT-DS17060	None
chr1	9931491	9933486	73642	IM	IM	0.0224	0.0221	0.0303	None	0.0166	AllTSS2	1.01357	0.547855	Snhg6	0.0167	0.0287	0.0281	0.0316	0.0247	0.0313	0.0252	0.0193	0.0172	0.0138	0.0187	0.0212	0.00603021	0.00636885	0.00632008	0.00674847	cUMR	2176	6	FALSE	FALSE	mGER-DS15410 mPATSKI-DS15697 mKidney-DS13948 CH12-DS22542 mGenitalFatPad-DS18780 mGER-DS15410 CH12-DS22542 mfLiver_F5-DS20999	None
chr1	9933651	9934955	73643	IM	IM	0.0309	0.0659	0.0667	None	0.032	Other	0.468892	0.47976	Snhg6	0.0739	0.0529	0.0606	0.0795	0.0327	0.0593	0.0329	0.0273	0.0289	0.0267	0.0402	0.0368	0.00603021	0.00636885	0.00632008	0.00674847	cUMR	2176	4	FALSE	FALSE	mNIH_3T3-DS16900 mATr-DS20149 mGER-DS15420 mGER-DS15410	None
chr1	9937305	9939283	73644	IM	None	0.0205	0.0276	0.0168	None	0.0178	Enhancer4	0.742754	1.05952	6030422M02Rik	0.0266	0.0285	0.0288	0.0171	0.0144	0.0181	0.0185	0.024	0.023	0.016	0.0198	0.0203	0.00603021	0.00636885	0.00632008	0.00674847	None	0	2	FALSE	FALSE	mPATSKI-DS15697 mfLiver_F2-DS20994	None
chr1	9940029	9940830	73645	I	M	0.0185	0.024	0.0185	None	0.0203	Enhancer4	0.770833	1.0973	6030422M02Rik	0.0249	0.0213	0.025	0.0181	0.0194	0.0188	0.0151	0.0231	0.0238	0.0198	0.0211	0.0209	0.00603021	0.00636885	0.00632008	0.00674847	None	0	2	FALSE	FALSE	mGER-DS15420 mCJ7-DS13320	None
chr1	9941480	9941867	73646	None	I	0.0159	0.0155	0.0273	None	0.0149	Enhancer4	1.02581	0.545788	6030422M02Rik	0.0192	0.0109	0.0117	0.033	0.0155	0.0214	0.0161	0.0141	0.0171	0.0152	0.0154	0.0137	0.00603021	0.00636885	0.00632008	0.00674847	None	0	2	FALSE	FALSE	mESC_FIKO-DS17063 mPATSKI-DS15697	None
chr1	9956945	9958380	73647	I	None	0.0153	0.0269	0.008	None	0.0127	Other	0.568773	1.5875	6030422M02Rik	0.0382	0.0125	0.0152	0.0087	0.0069	0.0071	0.0173	0.0121	0.0129	0.0142	0.013	0.0087	0.00603021	0.00636885	0.00632008	0.00674847	cUMR	1871	8	FALSE	FALSE	mHindlimbsBuds-DS18279 ZhBTc4-DS17562 mMesoderm-DS18198 mRetina-DS20000 mESC_F4WT-DS17060 mPATSKI-DS15697 mATn-DS17070 mATr-DS20149	None
chr1	9979971	9980516	73648	I	I	0.0088	0.0231	0.0217	None	0.0102	Enhancer4	0.380952	0.470046	Ppp1r42	0.0195	0.0271	0.0274	0.0221	0.017	0.0245	0.0078	0.0113	0.0089	0.009	0.0112	0.0119	0.00603021	0.00636885	0.00632008	0.00674847	None	0	2	FALSE	FALSE	mPATSKI-DS15697 mCJ7-DS13320	None
chr1	9981678	9982403	73649	IM	M	0.023	0.023	0.0202	None	0.026	Other	1	1.28713	Ppp1r42	0.0222	0.0232	0.0245	0.0199	0.021	0.0203	0.0189	0.0285	0.0296	0.0227	0.0288	0.0311	0.00603021	0.00636885	0.00632008	0.00674847	None	0	2	FALSE	FALSE	CH12-DS22542 mA20-DS16695	None
chr1	9983237	9983716	73650	M	M	0.0214	0.0187	0.0168	None	0.0209	Other	1.14439	1.24405	Ppp1r42	0.0175	0.0228	0.0169	0.0173	0.0157	0.0162	0.0223	0.0177	0.023	0.0228	0.0184	0.0189	0.00603021	0.00636885	0.00632008	0.00674847	None	0	0	FALSE	FALSE		None
chr1	10013871	10014702	73652	IM	M	0.0221	0.0232	0.0199	None	0.0253	Other	0.952586	1.27136	Cops5	0.0232	0.0253	0.0208	0.02	0.0173	0.0217	0.0229	0.0208	0.021	0.0258	0.0226	0.0271	0.00603021	0.00636885	0.00632008	0.00674847	None	0	0	FALSE	FALSE		None
chr1	10027435	10030676	73653	IM	IM	0.0528	0.0703	0.0675	None	0.042	AllTSS2	0.751067	0.622222	Cops5 Cspp1	0.0735	0.0702	0.0624	0.0822	0.0319	0.0557	0.0661	0.0335	0.0339	0.0379	0.0515	0.0424	0.00603021	0.00636885	0.00632008	0.00674847	cUMR	3145	11	FALSE	FALSE	mfLiver_F5-DS20999 m3134-DS8497 mThymus-DS18819 mATn-DS17070 mRetina-DS20000 mfLiver-DS19246 mfLiver_F2-DS20994 mfLiver_F1-DS20991 mfLiver_F3-DS20937 mPATSKI-DS15697 CH12-DS22542 m3134-DS8497 mPATSKI-DS15697	None
chr1	10079414	10080243	73654	IM	IM	0.0179	0.0322	0.0392	None	0.0148	Other	0.555901	0.377551	Cspp1	0.0305	0.0313	0.0375	0.0359	0.0458	0.0428	0.0159	0.0221	0.0192	0.0115	0.0187	0.0189	0.00603021	0.00636885	0.00632008	0.00674847	None	0	2	FALSE	FALSE	mTN-DS16171 mPATSKI-DS15697	None
chr1	10099122	10099532	73655	I	None	0.0148	0.0212	0.0226	None	0.0143	Enhancer4	0.698113	0.632743	Cspp1	0.0171	0.0232	0.0291	0.0163	0.0244	0.0386	0.0136	0.012	0.022	0.0132	0.0121	0.0194	0.00603021	0.00636885	0.00632008	0.00674847	None	0	1	FALSE	FALSE	mfLiver_F5-DS20999	None
chr1	10103760	10104586	73656	M	None	0.018	0.0149	0.0144	None	0.0162	Other	1.20805	1.125	Cspp1	0.0132	0.0173	0.0166	0.0131	0.0174	0.0156	0.0163	0.0201	0.0212	0.0154	0.0165	0.0179	0.00603021	0.00636885	0.00632008	0.00674847	None	0	1	FALSE	FALSE	mfLiver_F2-DS20994	None
chr1	10104944	10105598	73657	I	None	0.0167	0.0164	0.0156	None	0.0177	AllTSS2	1.01829	1.13462	Cspp1	0.0161	0.0122	0.022	0.0157	0.0184	0.0129	0.0142	0.0223	0.0177	0.0169	0.0165	0.0208	0.00603021	0.00636885	0.00632008	0.00674847	None	0	1	FALSE	FALSE	m416B-DS14099	None
chr1	10105711	10106764	73658	I	M	0.0154	0.0198	0.016	None	0.0188	Other	0.777778	1.175	Cspp1	0.0227	0.0165	0.0161	0.0149	0.018	0.0174	0.0137	0.0198	0.0157	0.0211	0.0176	0.0145	0.00603021	0.00636885	0.00632008	0.00674847	None	0	1	FALSE	FALSE	mMesoderm-DS18198	None
chr1	10120972	10123040	73659	IM	IM	0.0211	0.0163	0.0226	None	0.0186	Other	1.29448	0.823009	Cspp1	0.0152	0.0165	0.0187	0.0224	0.022	0.0234	0.0215	0.0189	0.0226	0.0162	0.0214	0.0216	0.00603021	0.00636885	0.00632008	0.00674847	None	0	4	FALSE	FALSE	ZhBTc4-DS17562 mIntestine_Large-DS19140 mGER-DS15420 mFatPad-DS14021	None
chr1	10123094	10124239	73660	IM	I	0.0211	0.0194	0.0199	None	0.0189	AllTSS2	1.08763	0.949749	Cspp1	0.0173	0.0198	0.0243	0.0187	0.0203	0.0229	0.0207	0.0169	0.0276	0.0175	0.0179	0.0236	0.00603021	0.00636885	0.00632008	0.00674847	None	0	4	FALSE	FALSE	mCerebrum-DS14024 mfLiver_F2-DS20994 mfLiver_F5-DS20999 mPATSKI-DS15697	None
chr1	10129541	10131070	73661	IM	M	0.0184	0.0198	0.0196	None	0.0254	Other	0.929293	1.29592	Arfgef1	0.0202	0.0174	0.0213	0.0204	0.0195	0.0172	0.0191	0.018	0.0165	0.0236	0.0305	0.0247	0.00603021	0.00636885	0.00632008	0.00674847	None	0	2	FALSE	FALSE	mBrain-DS12727 mCJ7-DS13320	None
chr1	10131269	10131879	73662	I	M	0.0177	0.0209	0.0172	None	0.019	Other	0.84689	1.10465	Arfgef1	0.0217	0.0158	0.025	0.0184	0.0156	0.0149	0.0177	0.0218	0.0132	0.0196	0.0183	0.0184	0.00603021	0.00636885	0.00632008	0.00674847	None	0	1	FALSE	FALSE	mCerebrum-DS14024	None
chr1	10216857	10217728	73664	IM	IM	0.0182	0.0225	0.023	None	0.0174	Enhancer4	0.808889	0.756522	Arfgef1	0.0195	0.0263	0.0257	0.0232	0.0216	0.0237	0.0141	0.0206	0.0284	0.0139	0.0215	0.0216	0.00603021	0.00636885	0.00632008	0.00674847	None	0	1	FALSE	FALSE	mCJ7-DS13320	None
chr1	10218041	10218938	73665	IM	M	0.0193	0.0182	0.0196	None	0.0175	Enhancer4	1.06044	0.892857	Arfgef1	0.0157	0.0255	0.0162	0.0189	0.0214	0.0202	0.0228	0.0155	0.0126	0.0135	0.0222	0.0227	0.00603021	0.00636885	0.00632008	0.00674847	None	0	0	FALSE	FALSE		None
chr1	10218942	10219528	73666	None	I	0.0138	0.0144	0.0277	None	0.0106	Other	0.958333	0.382671	Arfgef1	0.0121	0.0181	0.0162	0.0251	0.0315	0.0316	0.0146	0.0137	0.0118	0.0078	0.0126	0.0154	0.00603021	0.00636885	0.00632008	0.00674847	None	0	2	FALSE	FALSE	mPATSKI-DS15697 mFibroblast-DS10088	None
chr1	10221528	10223878	73667	IM	IM	0.04	0.071	0.0503	None	0.0425	AllTSS2	0.56338	0.84493	Arfgef1	0.0957	0.0445	0.0394	0.0593	0.0267	0.0446	0.0481	0.028	0.0284	0.0456	0.0401	0.0375	0.00603021	0.00636885	0.00632008	0.00674847	cUMR	2466	6	FALSE	FALSE	mA20-DS16695 mPATSKI-DS15697 mA20-DS16695 mMesoderm-DS18198 mATr-DS20149 mTR-DS17864 mPATSKI-DS15697 mA20-DS16695 E14-DS21450 mA20-DS16695	None
chr1	10226298	10227038	73668	M	None	0.0209	0.0143	0.0177	None	0.013	Other	1.46154	0.734463	Arfgef1	0.0116	0.0205	0.014	0.0164	0.0178	0.0213	0.0241	0.016	0.0167	0.0117	0.0123	0.0169	0.00603021	0.00636885	0.00632008	0.00674847	None	0	2	FALSE	FALSE	mForelimbBuds-DS18275 mHindlimbsBuds-DS18279	None
chr1	10236399	10236847	73669	M	None	0.0177	0.0122	0.0155	None	0.0126	Other	1.45082	0.812903	Arfgef1	0.0093	0.0181	0.0124	0.0148	0.0202	0.0134	0.0169	0.0172	0.0212	0.0128	0.0132	0.0115	0.00603021	0.00636885	0.00632008	0.00674847	None	0	0	FALSE	FALSE		None
chr1	10243945	10245762	73670	IM	IM	0.0176	0.0188	0.0381	None	0.0184	Enhancer4	0.93617	0.48294	Arfgef1	0.0168	0.0182	0.0246	0.0453	0.0289	0.0257	0.0165	0.0198	0.0184	0.0154	0.02	0.0241	0.00603021	0.00636885	0.00632008	0.00674847	None	0	4	FALSE	FALSE	mIntestine_Large-DS19140 m416B-DS14099 mIntestine_Large-DS19140 ZhBTc4-DS15236 mGenitalFatPad-DS18780	None
chr1	10247408	10247965	73671	None	I	0.0078	0.0129	0.0282	None	0.0138	Other	0.604651	0.489362	Arfgef1	0.0114	0.0107	0.0195	0.0355	0.0159	0.0179	0.0073	0.0076	0.0095	0.014	0.0139	0.0133	0.00603021	0.00636885	0.00632008	0.00674847	None	0	2	FALSE	FALSE	mKidney-DS13948 mPATSKI-DS15697	None
chr1	10251179	10251808	73672	None	I	0.0085	0.0097	0.0268	None	0.0109	Enhancer4	0.876289	0.406716	Arfgef1	0.01	0.0103	0.0082	0.0314	0.0167	0.0223	0.0094	0.0075	0.0068	0.0096	0.0136	0.0114	0.00603021	0.00636885	0.00632008	0.00674847	None	0	2	FALSE	FALSE	mPATSKI-DS15697 m416B-DS14099	None
chr1	10253894	10255111	73673	M	None	0.0193	0.0143	0.0132	None	0.0118	Enhancer4	1.34965	0.893939	Arfgef1	0.0136	0.0168	0.013	0.0119	0.0173	0.0135	0.0184	0.0187	0.0228	0.011	0.0123	0.0132	0.00603021	0.00636885	0.00632008	0.00674847	None	0	1	FALSE	FALSE	mFibroblast-DS10088	None
chr1	10256038	10256421	73674	M	None	0.0186	0.0116	0.0151	None	0.0113	Enhancer4	1.60345	0.748344	Arfgef1	0.0124	0.0081	0.0135	0.0166	0.0084	0.0164	0.0194	0.0187	0.0163	0.0107	0.0089	0.0155	0.00603021	0.00636885	0.00632008	0.00674847	None	0	0	FALSE	FALSE		None
chr1	10258320	10258843	73676	None	I	0.0161	0.0151	0.0277	None	0.0165	Enhancer4	1.06623	0.595668	Arfgef1	0.0135	0.0204	0.0131	0.0313	0.023	0.0217	0.0142	0.0169	0.0211	0.0127	0.0232	0.0192	0.00603021	0.00636885	0.00632008	0.00674847	None	0	1	FALSE	FALSE	m416B-DS14099	None
chr1	10259148	10259663	73677	None	I	0.0149	0.0106	0.0269	None	0.0106	Other	1.40566	0.394052	Arfgef1	0.0108	0.0118	0.0088	0.0305	0.0214	0.0215	0.016	0.0118	0.0151	0.0077	0.014	0.0145	0.00603021	0.00636885	0.00632008	0.00674847	None	0	1	FALSE	FALSE	CH12-DS22542	None
chr1	10269158	10269673	73679	None	I	0.0162	0.0175	0.0257	None	0.0181	Enhancer4	0.925714	0.70428	Arfgef1	0.0178	0.0168	0.0178	0.0213	0.0312	0.0332	0.0175	0.012	0.0168	0.0139	0.0241	0.0223	0.00603021	0.00636885	0.00632008	0.00674847	None	0	2	FALSE	FALSE	mMesoderm-DS18198 mHeart-DS17909	None
chr1	10269998	10270810	73680	None	I	0.01	0.0098	0.0371	None	0.0125	Enhancer4	1.02041	0.336927	Arfgef1	0.0093	0.0105	0.0102	0.0445	0.0272	0.0248	0.011	0.0086	0.0083	0.0113	0.0137	0.0142	0.00603021	0.00636885	0.00632008	0.00674847	None	0	2	FALSE	FALSE	MEL-DS13036 mA20-DS16695	None
chr1	10305082	10305903	73681	IM	None	0.0189	0.019	0.0181	None	0.0168	Other	0.994737	0.928177	Arfgef1	0.0191	0.0201	0.0175	0.02	0.0194	0.0116	0.0175	0.0206	0.0213	0.0153	0.0193	0.0178	0.00603021	0.00636885	0.00632008	0.00674847	None	0	1	FALSE	FALSE	m416B-DS14099	None
chr1	10306236	10306490	73682	I	None	0.0106	0.0199	0.0137	None	0.0116	Other	0.532663	0.846715	Arfgef1	0.0198	0.0218	0.0178	0.013	0.013	0.0162	0.01	0.0163	0.0057	0.0142	0.0103	0.0065	0.00603021	0.00636885	0.00632008	0.00674847	None	0	0	FALSE	FALSE		None
chr1	10312274	10312528	73683	M	None	0.0187	0.0147	0.0193	None	0.0117	Enhancer4	1.27211	0.606218	Arfgef1	0.0142	0.0139	0.0167	0.0231	0.0103	0.0162	0.0195	0.0144	0.0213	0.0125	0.0054	0.0164	0.00603021	0.00636885	0.00632008	0.00674847	None	0	0	FALSE	FALSE		None
chr1	10314934	10316797	73684	I	IM	0.0121	0.0166	0.0709	I	0.0247	Enhancer4	0.728916	0.348378	Cpa6	0.0151	0.0184	0.0182	0.0733	0.0581	0.0749	0.0113	0.0111	0.0158	0.0214	0.0257	0.032	0.00603021	0.00636885	0.00632008	0.00674847	None	0	2	FALSE	FALSE	mGER-DS15400 mfLiver_DLCR-DS19241	None
chr1	10320745	10321872	73685	None	I	0.0164	0.0157	0.0252	None	0.0162	Enhancer4	1.04459	0.642857	Cpa6	0.0158	0.0142	0.0174	0.0242	0.0269	0.0267	0.015	0.0206	0.0161	0.0148	0.0178	0.0177	0.00603021	0.00636885	0.00632008	0.00674847	None	0	2	FALSE	FALSE	mMesoderm-DS18198 MEL-DS13036	None
chr1	10324275	10324717	73686	I	None	0.0145	0.0195	0.0162	None	0.017	Other	0.74359	1.04938	Cpa6	0.0207	0.0132	0.0239	0.0164	0.0148	0.0168	0.0148	0.0145	0.0134	0.0181	0.0127	0.0186	0.00603021	0.00636885	0.00632008	0.00674847	None	0	0	FALSE	FALSE		None
chr1	10370547	10371554	73689	IM	None	0.0179	0.0187	0.0156	None	0.0163	Other	0.957219	1.04487	Cpa6	0.0178	0.0218	0.0172	0.0156	0.0133	0.0178	0.0161	0.0216	0.0195	0.0131	0.0206	0.02	0.00603021	0.00636885	0.00632008	0.00674847	None	0	1	FALSE	FALSE	mPATSKI-DS15697	None
chr1	10419651	10420278	73690	None	I	0.0107	0.0108	0.0261	None	0.0144	Other	0.990741	0.551724	Cpa6	0.0088	0.0107	0.016	0.0209	0.0349	0.0334	0.0104	0.0101	0.0123	0.0097	0.0192	0.0209	0.00603021	0.00636885	0.00632008	0.00674847	None	0	1	FALSE	FALSE	mCerebrum-DS14024	None
chr1	10433813	10434783	73691	M	None	0.0223	0.0162	0.0162	None	0.0155	Other	1.37654	0.95679	Cpa6	0.0145	0.0215	0.0145	0.0139	0.0195	0.0201	0.0238	0.015	0.0264	0.0139	0.0178	0.0169	0.00603021	0.00636885	0.00632008	0.00674847	None	0	1	FALSE	FALSE	mGenitalFatPad-DS18780	None
chr1	10449038	10449846	73692	None	I	0.0121	0.0113	0.0274	None	0.0131	Enhancer4	1.0708	0.478102	Cpa6	0.01	0.0109	0.0151	0.0129	0.0465	0.0521	0.0107	0.0167	0.0109	0.0098	0.013	0.0214	0.00603021	0.00636885	0.00632008	0.00674847	None	0	1	FALSE	FALSE	mfLiver_F2-DS20994	None
chr1	10450594	10451174	73694	M	None	0.0173	0.0102	0.0115	None	0.0121	Other	1.69608	1.05217	Cpa6	0.0093	0.0106	0.0122	0.0113	0.0128	0.0109	0.0175	0.0152	0.019	0.0115	0.0102	0.0156	0.00603021	0.00636885	0.00632008	0.00674847	None	0	0	FALSE	FALSE		None
chr1	10451218	10452074	73695	M	None	0.0212	0.0111	0.0141	None	0.0144	Other	1.90991	1.02128	Cpa6	0.0113	0.0125	0.0091	0.013	0.0117	0.0191	0.0218	0.0193	0.0218	0.015	0.0127	0.0146	0.00603021	0.00636885	0.00632008	0.00674847	None	0	0	FALSE	FALSE		None
chr1	10452134	10452641	73696	M	None	0.0177	0.0146	0.0135	None	0.0138	Enhancer4	1.21233	1.02222	Cpa6	0.0116	0.0168	0.0196	0.0127	0.0139	0.0155	0.015	0.0192	0.0242	0.0141	0.011	0.0161	0.00603021	0.00636885	0.00632008	0.00674847	None	0	0	FALSE	FALSE		None
chr1	10473960	10474233	73699	M	None	0.0174	0.0123	0.0159	None	0.0105	Enhancer4	1.41463	0.660377	Cpa6	0.0094	0.0172	0.0138	0.0168	0.0128	0.016	0.0194	0.0141	0.0152	0.0095	0.0082	0.0154	0.00603021	0.00636885	0.00632008	0.00674847	None	0	0	FALSE	FALSE		None
chr1	10474519	10476229	73700	IM	IM	0.0176	0.0176	0.0314	None	0.0195	Enhancer4	1	0.621019	Cpa6	0.0158	0.0205	0.019	0.0273	0.0374	0.038	0.0161	0.0185	0.0214	0.0163	0.0207	0.026	0.00603021	0.00636885	0.00632008	0.00674847	None	0	1	FALSE	FALSE	m416B-DS14099	None
chr1	10476249	10477390	73701	None	I	0.0133	0.0121	0.0255	None	0.0125	Enhancer4	1.09917	0.490196	Cpa6	0.0106	0.0159	0.0116	0.0274	0.0239	0.0217	0.0158	0.0096	0.01	0.0116	0.0104	0.017	0.00603021	0.00636885	0.00632008	0.00674847	None	0	3	FALSE	FALSE	mGenitalFatPad-DS18780 mPATSKI-DS15697 mCerebrum-DS14024	None
chr1	10478018	10478909	73702	IM	IM	0.0222	0.0216	0.0281	None	0.0159	Enhancer4	1.02778	0.565836	Cpa6	0.0211	0.023	0.0212	0.0304	0.0284	0.0215	0.0198	0.0237	0.0281	0.0147	0.0159	0.0189	0.00603021	0.00636885	0.00632008	0.00674847	None	0	2	FALSE	FALSE	m416B-DS14099 CH12-DS22542	None
chr1	10499588	10500059	73704	M	None	0.0185	0.0101	0.0101	None	0.0106	Other	1.83168	1.0495	Cpa6	0.0099	0.0065	0.0151	0.0094	0.0132	0.0093	0.0181	0.0187	0.0193	0.0108	0.0089	0.0119	0.00603021	0.00636885	0.00632008	0.00674847	None	0	0	FALSE	FALSE		None
chr1	10525276	10525887	73706	M	None	0.0178	0.0131	0.0098	None	0.0121	Other	1.35878	1.23469	Cpa6	0.0122	0.012	0.0168	0.0093	0.0094	0.0116	0.0126	0.0133	0.0397	0.0118	0.014	0.0109	0.00603021	0.00636885	0.00632008	0.00674847	None	0	0	FALSE	FALSE		None
chr1	10542598	10543071	73707	M	None	0.0185	0.0119	0.0149	None	0.0155	Other	1.55462	1.04027	Cpa6	0.0085	0.0234	0.0073	0.0152	0.0136	0.0151	0.0207	0.0112	0.0204	0.0161	0.0144	0.0153	0.00603021	0.00636885	0.00632008	0.00674847	None	0	0	FALSE	FALSE		None
chr1	10543647	10544071	73708	None	I	0.0163	0.0121	0.02	None	0.0134	Other	1.34711	0.67	Cpa6	0.0093	0.0143	0.0169	0.0168	0.0263	0.0239	0.0146	0.019	0.0184	0.0113	0.0177	0.0139	0.00603021	0.00636885	0.00632008	0.00674847	None	0	1	FALSE	FALSE	mFatPad-DS14021	None
chr1	10544371	10544822	73709	None	I	0.0122	0.0089	0.0208	None	0.01	Enhancer4	1.37079	0.480769	Cpa6	0.0076	0.0081	0.0132	0.01	0.025	0.0477	0.0091	0.0173	0.0161	0.0068	0.0117	0.0164	0.00603021	0.00636885	0.00632008	0.00674847	None	0	0	FALSE	FALSE		None
chr1	10604761	10605232	73714	None	M	0.0161	0.0159	0.0164	None	0.0198	Other	1.01258	1.20732	Cpa6	0.0166	0.0127	0.0177	0.0156	0.0157	0.0193	0.0149	0.0173	0.0186	0.021	0.0164	0.0204	0.00603021	0.00636885	0.00632008	0.00674847	None	0	0	FALSE	FALSE		None
chr1	10635359	10636857	73715	M	None	0.0165	0.0164	0.0111	None	0.0144	Other	1.0061	1.2973	Cpa6	0.0187	0.0129	0.0148	0.0102	0.0115	0.013	0.0159	0.0184	0.0159	0.0107	0.0235	0.014	0.00603021	0.00636885	0.00632008	0.00674847	None	0	0	FALSE	FALSE		None
chr1	10669199	10669799	73717	None	IM	0.0117	0.011	0.0204	None	0.0166	Enhancer4	1.06364	0.813725	Cpa6	0.0121	0.0096	0.0096	0.0083	0.0398	0.0385	0.0127	0.0108	0.0097	0.0157	0.0148	0.0209	0.00603021	0.00636885	0.00632008	0.00674847	None	0	1	FALSE	FALSE	mBrain-DS12727	None
chr1	10683332	10684803	73718	M	M	0.0185	0.0159	0.0119	None	0.0165	Other	1.16352	1.38655	Cpa6	0.0164	0.0164	0.0141	0.0116	0.014	0.0109	0.0178	0.0182	0.0212	0.0142	0.0234	0.0148	0.00603021	0.00636885	0.00632008	0.00674847	None	0	1	FALSE	FALSE	mForelimbBuds-DS18275	None
chr1	10685392	10685781	73719	None	M	0.0155	0.0154	0.0086	None	0.0197	Other	1.00649	2.2907	Cpa6	0.0205	0.0079	0.0112	0.0088	0.0076	0.0087	0.0169	0.014	0.0128	0.0205	0.0212	0.0162	0.00603021	0.00636885	0.00632008	0.00674847	None	0	1	FALSE	FALSE	mESC_F4WT-DS17060	None
chr1	10687093	10687761	73720	IM	M	0.0209	0.0186	0.0131	None	0.0182	Other	1.12366	1.38931	Cpa6	0.0222	0.0166	0.0116	0.0118	0.0154	0.0148	0.0179	0.0257	0.0249	0.0165	0.021	0.0197	0.00603021	0.00636885	0.00632008	0.00674847	None	0	0	FALSE	FALSE		None
chr1	10695100	10695413	73721	M	None	0.0209	0.0133	0.0119	None	0.0133	Other	1.57143	1.11765	Cpa6	0.0122	0.0133	0.016	0.0097	0.0093	0.0201	0.0198	0.0174	0.0282	0.0158	0.006	0.0145	0.00603021	0.00636885	0.00632008	0.00674847	None	0	0	FALSE	FALSE		None
chr1	10728188	10728647	73724	M	None	0.0192	0.0155	0.0127	None	0.0186	Other	1.23871	1.46457	Prex2	0.0182	0.0094	0.0159	0.0111	0.0153	0.015	0.0187	0.0218	0.0177	0.0172	0.0176	0.0232	0.00603021	0.00636885	0.00632008	0.00674847	None	0	0	FALSE	FALSE		None
chr1	10754653	10755453	73726	M	None	0.0195	0.0126	0.0123	None	0.0163	Other	1.54762	1.3252	Prex2	0.0141	0.0126	0.0088	0.0115	0.0164	0.0112	0.0196	0.0183	0.0204	0.0173	0.0143	0.016	0.00603021	0.00636885	0.00632008	0.00674847	None	0	0	FALSE	FALSE		None
chr1	10765705	10766222	73728	M	IM	0.0194	0.0171	0.0197	None	0.0206	Other	1.1345	1.04569	Prex2	0.0162	0.0165	0.0202	0.0207	0.0206	0.0164	0.0182	0.0181	0.0248	0.0229	0.0152	0.0208	0.00603021	0.00636885	0.00632008	0.00674847	None	0	0	FALSE	FALSE		None
chr1	10771364	10771821	73729	M	None	0.0196	0.0125	0.0127	None	0.0153	Other	1.568	1.20472	Prex2	0.01	0.016	0.0145	0.0131	0.0089	0.0149	0.0213	0.0182	0.0157	0.0145	0.0153	0.0173	0.00603021	0.00636885	0.00632008	0.00674847	None	0	0	FALSE	FALSE		None
chr1	10772316	10772936	73730	M	None	0.0213	0.012	0.0116	None	0.0145	Other	1.775	1.25	Prex2	0.011	0.0133	0.0129	0.0113	0.0117	0.0123	0.0208	0.0155	0.0299	0.0136	0.012	0.0191	0.00603021	0.00636885	0.00632008	0.00674847	None	0	0	FALSE	FALSE		None
chr1	10773763	10774227	73731	M	None	0.0197	0.0122	0.0136	None	0.0157	Other	1.61475	1.15441	Prex2	0.0099	0.0197	0.0091	0.012	0.016	0.016	0.0232	0.0107	0.0196	0.0163	0.0138	0.0162	0.00603021	0.00636885	0.00632008	0.00674847	None	0	1	FALSE	FALSE	mfBrain-DS14536	None
chr1	10791603	10792251	73732	IM	None	0.0198	0.0186	0.012	None	0.0153	Other	1.06452	1.275	Prex2	0.0158	0.023	0.0205	0.0121	0.0115	0.0121	0.0211	0.0121	0.0248	0.016	0.0126	0.0162	0.00603021	0.00636885	0.00632008	0.00674847	None	0	0	FALSE	FALSE		None
chr1	10792753	10793017	73733	M	None	0.0186	0.0099	0.0094	None	0.0119	Other	1.87879	1.26596	Prex2	0.0077	0.0135	0.0113	0.0098	0.0092	0.0084	0.0265	0.0055	0.009	0.0101	0.0136	0.0145	0.00603021	0.00636885	0.00632008	0.00674847	None	0	0	FALSE	FALSE		None
chr1	10793153	10797782	73734	IM	IM	0.0324	0.0281	0.0132	None	0.023	Other	1.15302	1.74242	Prex2	0.0337	0.0236	0.0192	0.0143	0.0111	0.0122	0.0336	0.0298	0.0318	0.0199	0.028	0.0255	0.00603021	0.00636885	0.00632008	0.00674847	None	0	2	FALSE	FALSE	E14-DS21450 ZhBTc4-DS17562	None
chr1	10928712	10929110	73738	M	None	0.0186	0.0169	0.0146	None	0.0126	Other	1.10059	0.863014	Prex2	0.0147	0.021	0.0175	0.0135	0.0186	0.0142	0.0183	0.0205	0.0174	0.0115	0.0146	0.0132	0.00603021	0.00636885	0.00632008	0.00674847	None	0	0	FALSE	FALSE		None
chr1	10932997	10933808	73739	M	None	0.0199	0.0145	0.0131	None	0.0118	Other	1.37241	0.900763	Prex2	0.0128	0.0176	0.015	0.011	0.0121	0.0198	0.0214	0.0187	0.0165	0.0127	0.0093	0.0121	0.00603021	0.00636885	0.00632008	0.00674847	None	0	2	FALSE	FALSE	mCerebrum-DS14024 mKidney-DS13948	None
chr1	10934843	10935504	73740	IM	None	0.0194	0.0185	0.0147	None	0.0173	Other	1.04865	1.17687	Prex2	0.0163	0.0228	0.0189	0.014	0.0163	0.0152	0.0174	0.0211	0.0239	0.0189	0.014	0.017	0.00603021	0.00636885	0.00632008	0.00674847	None	0	1	FALSE	FALSE	mNIH_3T3-DS16900	None
chr1	10955415	10956087	73742	IM	IM	0.0213	0.0148	0.0146	None	0.0186	Other	1.43919	1.27397	Prex2	0.0163	0.01	0.0167	0.0151	0.0102	0.0169	0.0202	0.0199	0.0267	0.0185	0.0209	0.0164	0.00603021	0.00636885	0.00632008	0.00674847	None	0	1	FALSE	FALSE	mKidney-DS13948	None
chr1	10980192	10980638	73743	M	None	0.0174	0.0108	0.0101	None	0.0118	Other	1.61111	1.16832	Prex2	0.0082	0.0118	0.0164	0.0107	0.0105	0.0084	0.0199	0.0167	0.0105	0.0104	0.0117	0.0155	0.00603021	0.00636885	0.00632008	0.00674847	None	0	0	FALSE	FALSE		None
chr1	10982648	10986210	73744	IM	M	0.0292	0.0239	0.0101	None	0.0183	AllTSS2	1.22176	1.81188	Prex2	0.0276	0.0201	0.019	0.0105	0.0099	0.0093	0.0334	0.0221	0.0242	0.0166	0.0209	0.0197	0.00603021	0.00636885	0.00632008	0.00674847	cUMR	1758	6	FALSE	FALSE	mHeart-DS17909 mHeart-DS17909 m3134-DS8497 mRetina-DS19060 mMesoderm-DS18198 ZhBTc4-DS17616 mKidney-DS13948 mHeart-DS17909	None
chr1	10986403	10987494	73745	M	None	0.0193	0.0134	0.0111	None	0.0145	Other	1.4403	1.30631	Prex2	0.0124	0.0158	0.0134	0.0101	0.0134	0.0118	0.0221	0.013	0.0182	0.0147	0.0149	0.0137	0.00603021	0.00636885	0.00632008	0.00674847	None	0	1	FALSE	FALSE	mNIH_3T3-DS16900	None
chr1	10990775	10992188	73746	IM	IM	0.0183	0.0163	0.0156	None	0.0201	Other	1.1227	1.28846	Prex2	0.0141	0.0188	0.019	0.0142	0.0155	0.0198	0.0205	0.0137	0.0167	0.02	0.0182	0.0221	0.00603021	0.00636885	0.00632008	0.00674847	None	0	0	FALSE	FALSE		None
chr1	10992387	10992882	73747	I	I	0.0153	0.0168	0.0158	None	0.0163	Other	0.910714	1.03165	Prex2	0.0144	0.0205	0.0184	0.019	0.0124	0.0097	0.0152	0.0164	0.0144	0.0181	0.0093	0.0193	0.00603021	0.00636885	0.00632008	0.00674847	None	0	0	FALSE	FALSE		None
chr1	11047863	11048715	73749	M	M	0.0196	0.0123	0.0145	None	0.0156	Other	1.5935	1.07586	Prex2	0.0131	0.0112	0.0115	0.0156	0.0116	0.014	0.0201	0.0174	0.0209	0.014	0.016	0.0191	0.00603021	0.00636885	0.00632008	0.00674847	None	0	0	FALSE	FALSE		None
chr1	11076905	11077573	73752	M	None	0.0186	0.0119	0.011	None	0.0155	Other	1.56303	1.40909	Prex2	0.011	0.0142	0.0116	0.0091	0.0111	0.0162	0.0183	0.0203	0.0172	0.0159	0.0124	0.0176	0.00603021	0.00636885	0.00632008	0.00674847	None	0	0	FALSE	FALSE		None
chr1	11077577	11078025	73753	M	None	0.0176	0.0108	0.0126	None	0.0112	Other	1.62963	0.888889	Prex2	0.008	0.0133	0.0148	0.0126	0.0099	0.0146	0.0161	0.0187	0.0213	0.012	0.0101	0.0103	0.00603021	0.00636885	0.00632008	0.00674847	None	0	0	FALSE	FALSE		None
chr1	11141137	11142205	73760	M	None	0.0178	0.0098	0.0106	None	0.0161	Other	1.81633	1.51887	Prex2	0.0086	0.0111	0.0114	0.0101	0.0098	0.0127	0.0185	0.0169	0.0165	0.0158	0.0156	0.0173	0.00603021	0.00636885	0.00632008	0.00674847	None	0	2	FALSE	FALSE	mKidney-DS13948 mPATSKI-DS15697	None
chr1	11142518	11143049	73761	M	None	0.0171	0.0101	0.0112	None	0.0106	Other	1.69307	0.946429	Prex2	0.0087	0.0131	0.0102	0.0105	0.0155	0.0097	0.0174	0.0159	0.0175	0.0093	0.0113	0.0131	0.00603021	0.00636885	0.00632008	0.00674847	None	0	0	FALSE	FALSE		None
chr1	11144651	11145575	73762	M	None	0.0192	0.01	0.0101	None	0.0144	Other	1.92	1.42574	Prex2	0.0102	0.0121	0.007	0.0101	0.01	0.0101	0.0216	0.0135	0.0183	0.0145	0.0139	0.0149	0.00603021	0.00636885	0.00632008	0.00674847	None	0	0	FALSE	FALSE		None
chr1	11154183	11157320	73766	M	M	0.0185	0.0143	0.0128	None	0.0156	Other	1.29371	1.21875	Prex2	0.0152	0.0132	0.0132	0.0135	0.0129	0.0107	0.019	0.0178	0.0181	0.0148	0.0165	0.0165	0.00603021	0.00636885	0.00632008	0.00674847	None	0	0	FALSE	FALSE		None
chr1	11224068	11224395	73770	I	None	0.0129	0.0185	0.0173	None	0.0175	Other	0.697297	1.01156	Prex2	0.0167	0.0253	0.0153	0.016	0.027	0.0131	0.0089	0.0145	0.0235	0.0134	0.0181	0.027	0.00603021	0.00636885	0.00632008	0.00674847	None	0	1	FALSE	FALSE	CH12-DS22542	None
chr1	11260957	11261483	73772	M	None	0.0172	0.0101	0.0093	None	0.0116	Other	1.70297	1.24731	Prex2	0.0085	0.0135	0.0101	0.0098	0.0086	0.0084	0.02	0.0109	0.0157	0.0091	0.0147	0.0145	0.00603021	0.00636885	0.00632008	0.00674847	None	0	0	FALSE	FALSE		None
chr1	11271015	11271462	73774	M	None	0.0179	0.0118	0.0094	None	0.0154	Other	1.51695	1.6383	Prex2	0.0098	0.015	0.013	0.0087	0.0116	0.0098	0.0159	0.0147	0.0283	0.0145	0.0118	0.0217	0.00603021	0.00636885	0.00632008	0.00674847	None	0	0	FALSE	FALSE		None
chr1	11316774	11320036	73777	IM	M	0.0219	0.017	0.0116	None	0.0227	Other	1.28824	1.9569	Prex2	0.0193	0.0134	0.0153	0.0118	0.0098	0.0127	0.0209	0.0222	0.0245	0.0226	0.0243	0.0212	0.00603021	0.00636885	0.00632008	0.00674847	None	0	1	FALSE	FALSE	mMesoderm-DS18198	None
chr1	11326031	11326284	73779	M	None	0.0204	0.0124	0.015	None	0.0154	Other	1.64516	1.02667	Prex2	0.0078	0.0247	0.0095	0.0139	0.0173	0.0159	0.0247	0.0099	0.0193	0.02	0.0084	0.0115	0.00603021	0.00636885	0.00632008	0.00674847	None	0	0	FALSE	FALSE		None
chr1	11340069	11340612	73780	M	None	0.0194	0.0073	0.0109	None	0.0137	Other	2.65753	1.25688	Prex2	0.0073	0.0064	0.0081	0.0103	0.0082	0.0151	0.0205	0.014	0.0226	0.0097	0.0193	0.0176	0.00603021	0.00636885	0.00632008	0.00674847	None	0	0	FALSE	FALSE		None
chr1	11400402	11401383	73781	M	None	0.0203	0.0112	0.0091	None	0.0108	Other	1.8125	1.18681	A830018L16Rik	0.0095	0.0123	0.0142	0.0093	0.009	0.0086	0.0209	0.0168	0.0228	0.0107	0.0076	0.0145	0.00603021	0.00636885	0.00632008	0.00674847	None	0	0	FALSE	FALSE		None
chr1	11401517	11402611	73782	M	None	0.019	0.0111	0.0091	None	0.0121	Other	1.71171	1.32967	A830018L16Rik	0.0109	0.0126	0.0099	0.0091	0.0107	0.0077	0.0196	0.0176	0.0188	0.011	0.0103	0.0164	0.00603021	0.00636885	0.00632008	0.00674847	None	0	0	FALSE	FALSE		None
chr1	11403603	11405683	73783	IM	M	0.0179	0.0209	0.0101	None	0.0166	AllTSS2	0.856459	1.64356	A830018L16Rik	0.026	0.0167	0.0127	0.0092	0.0122	0.0109	0.0193	0.0153	0.0167	0.016	0.02	0.0144	0.00603021	0.00636885	0.00632008	0.00674847	cUMR	1617	6	FALSE	FALSE	mCerebrum-DS14024 mPATSKI-DS15697 ZhBTc4-DS17562 mCerebellum-DS14034 mESC_F4WT-DS17060 mCerebellum-DS14034 mESC_F4WT-DS17060 mCJ7-DS13320	None
chr1	11405906	11406939	73784	M	M	0.0225	0.0143	0.0113	None	0.0162	Other	1.57343	1.43363	A830018L16Rik	0.0139	0.0162	0.0132	0.0104	0.0126	0.0126	0.0255	0.0163	0.0204	0.0165	0.0156	0.0161	0.00603021	0.00636885	0.00632008	0.00674847	None	0	1	FALSE	FALSE	mCerebrum-DS14024	None
chr1	11407049	11408964	73785	M	M	0.0228	0.0131	0.0101	None	0.0159	Other	1.74046	1.57426	A830018L16Rik	0.0109	0.0181	0.0126	0.0102	0.0123	0.008	0.0258	0.0178	0.0191	0.0152	0.0161	0.0172	0.00603021	0.00636885	0.00632008	0.00674847	None	0	1	FALSE	FALSE	mPATSKI-DS15697	None
chr1	11409617	11410095	73786	M	None	0.0193	0.0112	0.0124	None	0.0174	Other	1.72321	1.40323	A830018L16Rik	0.0103	0.0105	0.0142	0.0113	0.0132	0.0148	0.0171	0.026	0.0181	0.0127	0.0177	0.0288	0.00603021	0.00636885	0.00632008	0.00674847	None	0	0	FALSE	FALSE		None
chr1	11425393	11425709	73787	None	I	0.0144	0.009	0.0175	None	0.0136	Other	1.6	0.777143	A830018L16Rik	0.0096	0.0058	0.0111	0.0167	0.0212	0.0166	0.0141	0.0139	0.0163	0.0153	0.007	0.0163	0.00603021	0.00636885	0.00632008	0.00674847	None	0	0	FALSE	FALSE		None
chr1	11463521	11464505	73789	M	None	0.0195	0.0112	0.012	None	0.0138	Other	1.74107	1.15	A830018L16Rik	0.0097	0.0133	0.0124	0.0096	0.0141	0.0171	0.0208	0.0143	0.0216	0.014	0.0119	0.0153	0.00603021	0.00636885	0.00632008	0.00674847	None	0	0	FALSE	FALSE		None
chr1	11467097	11467947	73790	M	None	0.018	0.0107	0.0119	None	0.0154	Other	1.68224	1.29412	A830018L16Rik	0.0093	0.0132	0.0115	0.0117	0.0161	0.0091	0.0193	0.0145	0.0182	0.0161	0.0123	0.017	0.00603021	0.00636885	0.00632008	0.00674847	None	0	1	FALSE	FALSE	mForelimbBuds-DS18275	None
chr1	11570277	11570959	73799	M	None	0.0182	0.0109	0.0081	None	0.0132	Other	1.66972	1.62963	A830018L16Rik	0.0136	0.009	0.0064	0.007	0.0071	0.0119	0.0173	0.0205	0.0184	0.0147	0.0079	0.015	0.00603021	0.00636885	0.00632008	0.00674847	None	0	1	FALSE	FALSE	mBrain-DS12727	None
chr1	11621877	11622517	73803	None	IM	0.016	0.0137	0.017	None	0.0163	Other	1.16788	0.958824	A830018L16Rik	0.0101	0.0122	0.0247	0.0131	0.02	0.0255	0.0145	0.0228	0.0126	0.0173	0.0148	0.0155	0.00603021	0.00636885	0.00632008	0.00674847	None	0	1	FALSE	FALSE	mMesoderm-DS18198	None
chr1	11626341	11627402	73805	M	None	0.0159	0.0113	0.0109	None	0.0134	Other	1.40708	1.22936	A830018L16Rik	0.0087	0.0147	0.0139	0.0115	0.0113	0.0085	0.0162	0.0159	0.0153	0.0138	0.012	0.0137	0.00603021	0.00636885	0.00632008	0.00674847	None	0	0	FALSE	FALSE		None
chr1	11631633	11632594	73807	M	None	0.0165	0.0121	0.012	None	0.0134	Other	1.36364	1.11667	A830018L16Rik	0.0132	0.0101	0.0115	0.0113	0.0138	0.0127	0.0149	0.0143	0.024	0.0121	0.0136	0.0165	0.00603021	0.00636885	0.00632008	0.00674847	None	0	0	FALSE	FALSE		None
chr1	11640094	11640750	73810	M	None	0.0164	0.0089	0.0109	None	0.0105	Other	1.8427	0.963303	A830018L16Rik	0.0075	0.0111	0.0097	0.0118	0.0101	0.0092	0.0175	0.0129	0.0172	0.0122	0.008	0.009	0.00603021	0.00636885	0.00632008	0.00674847	None	0	1	FALSE	FALSE	mCerebrum-DS14024	None
chr1	11643479	11644197	73812	M	None	0.017	0.0097	0.0102	None	0.0128	Other	1.75258	1.2549	A830018L16Rik	0.0091	0.011	0.0097	0.0104	0.0134	0.007	0.0176	0.0129	0.0202	0.0119	0.016	0.0116	0.00603021	0.00636885	0.00632008	0.00674847	None	0	1	FALSE	FALSE	mCerebrum-DS14024	None
chr1	11647539	11648442	73813	I	IM	0.0122	0.0148	0.0251	None	0.0134	Other	0.824324	0.533865	A830018L16Rik	0.0135	0.0206	0.0115	0.0233	0.0283	0.0274	0.0119	0.0157	0.0092	0.0136	0.0109	0.0153	0.00603021	0.00636885	0.00632008	0.00674847	None	0	1	FALSE	FALSE	mPATSKI-DS15697	None
chr1	11949900	11950634	73829	M	None	0.0151	0.0121	0.0119	None	0.0153	Other	1.24793	1.28571	A830018L16Rik	0.0113	0.0143	0.0117	0.0112	0.0097	0.0155	0.0145	0.0156	0.0166	0.0135	0.0141	0.0209	0.00603021	0.00636885	0.00632008	0.00674847	None	0	1	FALSE	FALSE	mLung-DS14479	None
chr1	12033600	12034062	73835	M	None	0.0179	0.0103	0.0103	None	0.0127	Other	1.73786	1.23301	A830018L16Rik	0.0085	0.0146	0.0101	0.0102	0.0157	0.0063	0.02	0.0153	0.0144	0.0112	0.0149	0.014	0.00603021	0.00636885	0.00632008	0.00674847	None	0	0	FALSE	FALSE		None
chr1	12049349	12049900	73836	M	None	0.0165	0.0087	0.0075	None	0.0119	Other	1.89655	1.58667	A830018L16Rik	0.0072	0.0079	0.0134	0.0064	0.0077	0.0106	0.015	0.0169	0.021	0.0099	0.0137	0.0147	0.00603021	0.00636885	0.00632008	0.00674847	None	0	0	FALSE	FALSE		None
chr1	12059034	12059475	73837	M	None	0.0171	0.0141	0.0124	None	0.0174	Other	1.21277	1.40323	A830018L16Rik	0.0131	0.0128	0.0182	0.0136	0.0116	0.0099	0.017	0.0205	0.0132	0.0184	0.0169	0.0156	0.00603021	0.00636885	0.00632008	0.00674847	None	0	0	FALSE	FALSE		None
chr1	12160560	12161709	73847	I	None	0.013	0.0167	0.0086	None	0.0155	Other	0.778443	1.80233	A830018L16Rik	0.02	0.0122	0.0138	0.0092	0.0072	0.0079	0.012	0.0134	0.0156	0.0158	0.0163	0.0138	0.00603021	0.00636885	0.00632008	0.00674847	None	0	2	FALSE	FALSE	mESC_F4WT-DS17060 mA20-DS16695	None
chr1	12163917	12164980	73849	M	M	0.0185	0.0139	0.0131	None	0.0164	Other	1.33094	1.25191	A830018L16Rik	0.0123	0.0144	0.0174	0.0145	0.0108	0.0112	0.0181	0.0218	0.0157	0.0164	0.0165	0.0164	0.00603021	0.00636885	0.00632008	0.00674847	None	0	0	FALSE	FALSE		None
chr1	12165149	12166173	73850	M	M	0.0162	0.0124	0.0118	None	0.02	Other	1.30645	1.69492	A830018L16Rik	0.0128	0.0124	0.0114	0.012	0.0064	0.0157	0.0163	0.0146	0.0181	0.0237	0.0146	0.0166	0.00603021	0.00636885	0.00632008	0.00674847	None	0	0	FALSE	FALSE		None
chr1	12228721	12229409	73852	M	None	0.0188	0.0133	0.0118	None	0.016	Other	1.41353	1.35593	A830018L16Rik	0.0101	0.0204	0.0134	0.0111	0.0113	0.0144	0.02	0.0154	0.0192	0.0138	0.02	0.0171	0.00603021	0.00636885	0.00632008	0.00674847	None	0	1	FALSE	FALSE	mIntestine_Large-DS19140	None
chr1	12272653	12273420	73853	None	M	0.0152	0.0142	0.0132	None	0.0153	Other	1.07042	1.15909	A830018L16Rik	0.0125	0.0177	0.0144	0.0113	0.0124	0.0192	0.0134	0.0199	0.0157	0.0147	0.0148	0.0173	0.00603021	0.00636885	0.00632008	0.00674847	None	0	1	FALSE	FALSE	mCerebrum-DS14024	None
chr1	12324166	12324646	73855	M	None	0.0193	0.014	0.0107	None	0.0155	Other	1.37857	1.4486	A830018L16Rik	0.0146	0.0165	0.0096	0.0107	0.0124	0.0093	0.0198	0.0162	0.0213	0.0147	0.0176	0.0155	0.00603021	0.00636885	0.00632008	0.00674847	None	0	1	FALSE	FALSE	mRetina-DS20000	None
chr1	12342611	12343618	73858	M	None	0.0214	0.0139	0.0119	None	0.0163	Other	1.53957	1.36975	A830018L16Rik	0.0136	0.0126	0.016	0.0112	0.0148	0.0117	0.0177	0.0236	0.0305	0.0152	0.0184	0.0167	0.00603021	0.00636885	0.00632008	0.00674847	None	0	0	FALSE	FALSE		None
chr1	12389616	12390148	73860	M	None	0.0197	0.0127	0.0099	None	0.0166	Other	1.55118	1.67677	A830018L16Rik	0.011	0.0136	0.0159	0.0103	0.0122	0.0069	0.0192	0.0165	0.0252	0.0135	0.0184	0.0223	0.00603021	0.00636885	0.00632008	0.00674847	None	0	0	FALSE	FALSE		None
chr1	12409588	12409967	73861	M	None	0.019	0.0119	0.0119	None	0.0135	Other	1.59664	1.13445	A830018L16Rik	0.0106	0.0149	0.0115	0.0096	0.0174	0.0139	0.0177	0.0157	0.0273	0.0141	0.0192	0.006	0.00603021	0.00636885	0.00632008	0.00674847	None	0	0	FALSE	FALSE		None
chr1	12436467	12437058	73862	None	M	0.0064	0.0066	0.0068	None	0.0173	Other	0.969697	2.54412	A830018L16Rik	0.0053	0.0091	0.0068	0.0047	0.0125	0.0081	0.0067	0.005	0.0071	0.0279	0.0046	0.0043	0.00603021	0.00636885	0.00632008	0.00674847	None	0	0	FALSE	FALSE		None
chr1	12443096	12443409	73863	None	M	0.0155	0.0107	0.0072	None	0.0198	Other	1.4486	2.75	A830018L16Rik	0.0104	0.0104	0.0118	0.0067	0.0049	0.0106	0.0151	0.0133	0.0193	0.0223	0.0181	0.0154	0.00603021	0.00636885	0.00632008	0.00674847	None	0	1	FALSE	FALSE	mCerebrum-DS14024	None
chr1	12486604	12487642	73867	M	None	0.0186	0.0125	0.0105	None	0.0157	Other	1.488	1.49524	A830018L16Rik	0.0097	0.018	0.013	0.0107	0.0105	0.0099	0.0197	0.0179	0.0161	0.0154	0.0164	0.0155	0.00603021	0.00636885	0.00632008	0.00674847	None	0	1	FALSE	FALSE	mFibroblast-DS10088	None
chr1	12489152	12489909	73868	M	None	0.02	0.0107	0.0117	None	0.0175	Other	1.86916	1.49573	A830018L16Rik	0.0128	0.0074	0.0094	0.0122	0.0103	0.0114	0.0185	0.0219	0.0226	0.0148	0.0199	0.0218	0.00603021	0.00636885	0.00632008	0.00674847	None	0	0	FALSE	FALSE		None
chr1	12490202	12490487	73869	M	None	0.0182	0.0135	0.0107	None	0.0132	Other	1.34815	1.23364	A830018L16Rik	0.0109	0.0134	0.0205	0.0114	0.005	0.0135	0.0182	0.0156	0.0211	0.0123	0.0139	0.0148	0.00603021	0.00636885	0.00632008	0.00674847	None	0	1	FALSE	FALSE	mPATSKI-DS15697	None
chr1	12501768	12502281	73871	M	M	0.0186	0.0134	0.0116	None	0.0205	Other	1.38806	1.76724	A830018L16Rik	0.0105	0.0156	0.0183	0.011	0.0057	0.018	0.0178	0.0132	0.0274	0.0186	0.0194	0.0263	0.00603021	0.00636885	0.00632008	0.00674847	None	0	1	FALSE	FALSE	mHindlimbsBuds-DS18279	None
chr1	12594668	12594919	73877	M	None	0.0196	0.0148	0.0126	None	0.0132	Other	1.32432	1.04762	A830018L16Rik	0.0098	0.0188	0.0229	0.0136	0.0126	0.0099	0.0192	0.0184	0.0225	0.0105	0.0146	0.0182	0.00603021	0.00636885	0.00632008	0.00674847	None	0	0	FALSE	FALSE		None
chr1	12600288	12600841	73878	M	M	0.0191	0.014	0.0108	None	0.0191	Other	1.36429	1.76852	A830018L16Rik	0.0133	0.0134	0.0166	0.0101	0.009	0.0145	0.0153	0.0249	0.0241	0.0185	0.0197	0.0203	0.00603021	0.00636885	0.00632008	0.00674847	None	0	0	FALSE	FALSE		None
chr1	12609388	12609948	73879	M	None	0.021	0.0131	0.0107	None	0.0175	Other	1.60305	1.63551	A830018L16Rik	0.0119	0.0141	0.0152	0.0116	0.008	0.0105	0.0213	0.0244	0.0159	0.0162	0.017	0.0212	0.00603021	0.00636885	0.00632008	0.00674847	None	0	0	FALSE	FALSE		None
chr1	12612139	12612529	73880	M	None	0.0189	0.0156	0.0155	None	0.0183	Other	1.21154	1.18065	A830018L16Rik	0.0132	0.0184	0.0184	0.0166	0.0092	0.0177	0.018	0.025	0.0143	0.0172	0.0203	0.019	0.00603021	0.00636885	0.00632008	0.00674847	None	0	0	FALSE	FALSE		None
chr1	12666490	12666881	73882	M	None	0.0202	0.0136	0.0149	None	0.0189	Other	1.48529	1.26846	A830018L16Rik	0.0137	0.0152	0.0115	0.0158	0.0172	0.0107	0.0201	0.0181	0.023	0.0211	0.0129	0.0195	0.00603021	0.00636885	0.00632008	0.00674847	None	0	1	FALSE	FALSE	mESC_FIKO-DS17063	None
chr1	12681978	12682234	73883	I	None	0.0187	0.0218	0.0139	None	0.0205	Other	0.857798	1.47482	A830018L16Rik	0.0238	0.016	0.0235	0.0156	0.0115	0.011	0.0183	0.0204	0.018	0.0156	0.02	0.0332	0.00603021	0.00636885	0.00632008	0.00674847	None	0	2	FALSE	FALSE	mMesoderm-DS18198 mESC_FIKO-DS17063	None
chr1	12682355	12682845	73884	M	None	0.0196	0.0128	0.0103	None	0.0156	Other	1.53125	1.51456	A830018L16Rik	0.0153	0.0089	0.0107	0.0108	0.0148	0.0051	0.0227	0.0122	0.019	0.0169	0.0159	0.0119	0.00603021	0.00636885	0.00632008	0.00674847	None	0	2	FALSE	FALSE	mESC_FIKO-DS17063 mMesoderm-DS18198	None
chr1	12683310	12683750	73885	M	None	0.0223	0.0168	0.0148	None	0.0163	Other	1.32738	1.10135	A830018L16Rik	0.0199	0.0128	0.0137	0.0143	0.0165	0.0145	0.023	0.0162	0.0272	0.0166	0.0186	0.0133	0.00603021	0.00636885	0.00632008	0.00674847	None	0	2	FALSE	FALSE	mfBrain-DS14536 mMesoderm-DS18198	None
chr1	12684093	12684969	73886	M	None	0.0234	0.0137	0.0114	None	0.0181	Other	1.70803	1.58772	A830018L16Rik	0.0145	0.0114	0.0145	0.0102	0.0124	0.014	0.0237	0.024	0.0216	0.0182	0.0165	0.0193	0.00603021	0.00636885	0.00632008	0.00674847	None	0	0	FALSE	FALSE		None
chr1	12685256	12685559	73887	M	None	0.0203	0.0155	0.0115	None	0.0126	Other	1.30968	1.09565	A830018L16Rik	0.0132	0.0198	0.0165	0.0119	0.012	0.01	0.019	0.021	0.0238	0.0116	0.012	0.0156	0.00603021	0.00636885	0.00632008	0.00674847	None	0	2	FALSE	FALSE	E14-DS21450 mHeart-DS17909	None
chr1	12711775	12712231	73889	IM	None	0.0199	0.0187	0.0154	None	0.0203	Other	1.06417	1.31818	Sulf1	0.0167	0.0169	0.0258	0.0148	0.0163	0.0164	0.0196	0.0205	0.0205	0.0234	0.0184	0.0147	0.00603021	0.00636885	0.00632008	0.00674847	None	0	1	FALSE	FALSE	mCD1-DS17129	None
chr1	12713202	12713753	73890	M	None	0.0218	0.0169	0.0148	None	0.0227	Other	1.28994	1.53378	Sulf1	0.0167	0.0183	0.0156	0.0179	0.0087	0.0112	0.0203	0.0243	0.0233	0.0237	0.025	0.0177	0.00603021	0.00636885	0.00632008	0.00674847	None	0	2	FALSE	FALSE	mKidney-DS13948 mFibroblast-DS10088	None
chr1	12738022	12738447	73892	M	None	0.0204	0.0158	0.0157	None	0.0204	Other	1.29114	1.29936	Sulf1	0.0175	0.0149	0.0125	0.0168	0.0092	0.0178	0.0195	0.0225	0.0207	0.0172	0.0237	0.0249	0.00603021	0.00636885	0.00632008	0.00674847	None	0	0	FALSE	FALSE		None
chr1	12738493	12739027	73893	M	None	0.0175	0.012	0.013	None	0.0161	Other	1.45833	1.23846	Sulf1	0.0115	0.0078	0.0182	0.013	0.0131	0.013	0.0156	0.018	0.0228	0.0163	0.0139	0.0181	0.00603021	0.00636885	0.00632008	0.00674847	None	0	2	FALSE	FALSE	CH12-DS22542 mESC_F4WT-DS17060	None
chr1	12775651	12775996	73894	None	M	0.0196	0.0185	0.014	None	0.0268	Other	1.05946	1.91429	Sulf1	0.0214	0.0158	0.0144	0.0133	0.0138	0.016	0.0185	0.0191	0.0236	0.0315	0.0236	0.0184	0.00603021	0.00636885	0.00632008	0.00674847	None	0	1	FALSE	FALSE	mRetina-DS19060	None
chr1	12812156	12812756	73895	IM	None	0.0208	0.0207	0.0133	None	0.0195	Other	1.00483	1.46617	Sulf1	0.0219	0.0227	0.0151	0.0144	0.0102	0.0128	0.017	0.0245	0.0285	0.0164	0.0242	0.0221	0.00603021	0.00636885	0.00632008	0.00674847	None	0	0	FALSE	FALSE		None
chr1	12826845	12827331	73896	None	I	0.0116	0.0194	0.0228	None	0.0155	Other	0.597938	0.679825	Sulf1	0.0166	0.0214	0.0242	0.02	0.03	0.0247	0.0112	0.0149	0.0087	0.0143	0.0168	0.017	0.00603021	0.00636885	0.00632008	0.00674847	None	0	1	FALSE	FALSE	mPATSKI-DS15697	None
chr1	12831604	12832899	73897	IM	M	0.016	0.0192	0.012	None	0.0227	Other	0.833333	1.89167	Sulf1	0.0211	0.0152	0.019	0.011	0.0139	0.0133	0.0149	0.0214	0.0131	0.0214	0.0254	0.0231	0.00603021	0.00636885	0.00632008	0.00674847	None	0	3	FALSE	FALSE	CH12-DS22542 mESC_F4WT-DS17060 CH12-DS22542 mCJ7-DS13320	None
chr1	12834460	12835206	73898	M	M	0.0217	0.0166	0.0129	None	0.0225	Other	1.30723	1.74419	Sulf1	0.0161	0.0164	0.0178	0.0129	0.0097	0.0156	0.0205	0.0231	0.024	0.0232	0.0238	0.0192	0.00603021	0.00636885	0.00632008	0.00674847	None	0	0	FALSE	FALSE		None
chr1	12847215	12847470	73899	M	None	0.02	0.0111	0.0124	None	0.019	Other	1.8018	1.53226	Sulf1	0.0161	0.0037	0.0071	0.0125	0.0119	0.0123	0.0193	0.015	0.0282	0.0216	0.0158	0.016	0.00603021	0.00636885	0.00632008	0.00674847	None	0	0	FALSE	FALSE		None
chr1	12848251	12848765	73900	M	None	0.0205	0.0175	0.0157	None	0.0207	Other	1.17143	1.31847	Sulf1	0.0177	0.0159	0.0188	0.0137	0.0158	0.0212	0.0182	0.0244	0.0231	0.0221	0.0205	0.0173	0.00603021	0.00636885	0.00632008	0.00674847	None	0	0	FALSE	FALSE		None
chr1	12852289	12852894	73901	I	None	0.017	0.0216	0.0134	None	0.0177	Other	0.787037	1.3209	Tram1	0.0198	0.0255	0.0213	0.0124	0.014	0.0155	0.0156	0.018	0.02	0.0172	0.0196	0.0168	0.00603021	0.00636885	0.00632008	0.00674847	None	0	1	FALSE	FALSE	mMuscle_Skeletal-DS18130	None
chr1	12863490	12864083	73902	M	None	0.0229	0.0183	0.0128	None	0.02	Other	1.25137	1.5625	Slco5a1	0.0174	0.0232	0.0148	0.0134	0.014	0.0103	0.0257	0.0191	0.0184	0.0168	0.0303	0.0171	0.00603021	0.00636885	0.00632008	0.00674847	None	0	0	FALSE	FALSE		None
chr1	12865483	12865994	73903	None	I	0.0159	0.0162	0.0214	None	0.0171	Other	0.981481	0.799065	Slco5a1	0.02	0.0122	0.0111	0.0293	0.0108	0.0082	0.0156	0.0171	0.0157	0.0209	0.0133	0.0115	0.00603021	0.00636885	0.00632008	0.00674847	None	0	3	FALSE	FALSE	mLung-DS14479 CH12-DS22542 mA20-DS16695	None
chr1	12866019	12866633	73904	M	None	0.021	0.018	0.0163	None	0.0147	Other	1.16667	0.90184	Slco5a1	0.0159	0.0216	0.0192	0.0178	0.0093	0.018	0.0222	0.0223	0.0157	0.0141	0.0195	0.0108	0.00603021	0.00636885	0.00632008	0.00674847	None	0	3	FALSE	FALSE	mA20-DS16695 mGenitalFatPad-DS18780 mLung-DS14479	None
chr1	12867724	12868358	73905	M	None	0.0203	0.0155	0.0114	None	0.02	Other	1.30968	1.75439	Slco5a1	0.015	0.0209	0.0107	0.0114	0.0118	0.0113	0.0225	0.0177	0.0162	0.0196	0.0181	0.0228	0.00603021	0.00636885	0.00632008	0.00674847	None	0	2	FALSE	FALSE	mCerebrum-DS14024 mMuscle_Skeletal-DS18130	None
chr1	12868899	12869484	73906	M	None	0.0232	0.0177	0.0156	None	0.0224	Other	1.31073	1.4359	Slco5a1	0.0168	0.0175	0.02	0.0179	0.0108	0.0131	0.0234	0.0183	0.0285	0.0222	0.0234	0.0221	0.00603021	0.00636885	0.00632008	0.00674847	None	0	0	FALSE	FALSE		None
chr1	12869591	12870029	73907	M	M	0.0203	0.0192	0.0188	None	0.0241	Other	1.05729	1.28191	Slco5a1	0.0155	0.0263	0.0203	0.0182	0.0183	0.0207	0.0231	0.0198	0.0121	0.0238	0.0271	0.0215	0.00603021	0.00636885	0.00632008	0.00674847	None	0	1	FALSE	FALSE	mKidney-DS13948	None
chr1	12871233	12871503	73908	M	None	0.0212	0.0158	0.0134	None	0.0202	Other	1.34177	1.50746	Slco5a1	0.0157	0.011	0.0218	0.0139	0.0141	0.0115	0.0235	0.0131	0.0233	0.0198	0.0253	0.0158	0.00603021	0.00636885	0.00632008	0.00674847	None	0	0	FALSE	FALSE		None
chr1	12884333	12884724	73909	M	None	0.022	0.0149	0.0135	None	0.0157	Other	1.47651	1.16296	Slco5a1	0.0171	0.0109	0.014	0.0111	0.0178	0.0163	0.0207	0.0231	0.0246	0.0144	0.0166	0.0182	0.00603021	0.00636885	0.00632008	0.00674847	None	0	0	FALSE	FALSE		None
chr1	12884842	12885269	73910	M	None	0.0217	0.0118	0.0149	None	0.0135	Other	1.83898	0.90604	Slco5a1	0.0092	0.0174	0.0117	0.014	0.0165	0.016	0.0194	0.0226	0.0282	0.0115	0.0142	0.0179	0.00603021	0.00636885	0.00632008	0.00674847	None	0	0	FALSE	FALSE		None
chr1	12885402	12885823	73911	M	None	0.0192	0.0084	0.0112	None	0.016	Other	2.28571	1.42857	Slco5a1	0.0074	0.0157	0.0025	0.0125	0.0062	0.0118	0.0157	0.0239	0.0246	0.0132	0.0194	0.0193	0.00603021	0.00636885	0.00632008	0.00674847	None	0	0	FALSE	FALSE		None
chr1	12932540	12933054	73912	IM	None	0.0215	0.0206	0.0172	None	0.0214	Other	1.04369	1.24419	Slco5a1	0.0238	0.0119	0.0225	0.0169	0.0178	0.0176	0.0221	0.0204	0.0212	0.021	0.0204	0.0236	0.00603021	0.00636885	0.00632008	0.00674847	None	0	1	FALSE	FALSE	mPATSKI-DS15697	None
chr1	12943226	12943534	73914	M	None	0.0193	0.0144	0.0135	None	0.0152	Other	1.34028	1.12593	Slco5a1	0.0141	0.0138	0.0161	0.0155	0.0151	0.0064	0.0173	0.0269	0.0167	0.013	0.0196	0.016	0.00603021	0.00636885	0.00632008	0.00674847	None	0	0	FALSE	FALSE		None
chr1	12973208	12973617	73915	None	I	0.0145	0.0138	0.0201	None	0.0154	Other	1.05072	0.766169	Slco5a1	0.0147	0.0121	0.0135	0.0226	0.0206	0.0127	0.0174	0.0071	0.0144	0.0129	0.017	0.0199	0.00603021	0.00636885	0.00632008	0.00674847	None	0	1	FALSE	FALSE	CH12-DS22542	None
chr1	12973628	12974062	73916	M	None	0.0191	0.0186	0.0132	None	0.0141	Other	1.02688	1.06818	Slco5a1	0.0199	0.0202	0.0134	0.0134	0.0118	0.0138	0.0165	0.0202	0.0259	0.0128	0.0171	0.0145	0.00603021	0.00636885	0.00632008	0.00674847	None	0	0	FALSE	FALSE		None
chr1	12974124	12974706	73917	IM	I	0.0165	0.0164	0.0162	None	0.0153	Other	1.0061	0.944444	Slco5a1	0.0166	0.0159	0.0162	0.0148	0.0159	0.0202	0.0149	0.0238	0.0128	0.0153	0.0148	0.0157	0.00603021	0.00636885	0.00632008	0.00674847	None	0	0	FALSE	FALSE		None
chr1	12975341	12976680	73918	M	None	0.023	0.0181	0.0145	None	0.0191	Other	1.27072	1.31724	Slco5a1	0.0165	0.0193	0.0205	0.0143	0.0144	0.015	0.025	0.0195	0.0208	0.0183	0.0201	0.0197	0.00603021	0.00636885	0.00632008	0.00674847	None	0	1	FALSE	FALSE	mCerebrum-DS14024	None
chr1	12976860	12977200	73919	M	None	0.0191	0.0154	0.0097	None	0.012	Other	1.24026	1.23711	Slco5a1	0.0124	0.026	0.0106	0.0081	0.0098	0.0141	0.021	0.0114	0.0226	0.0105	0.0093	0.0188	0.00603021	0.00636885	0.00632008	0.00674847	None	0	1	FALSE	FALSE	mPATSKI-DS15697	None
chr1	12978748	12981435	73920	IM	M	0.0222	0.0238	0.0127	None	0.0221	AllTSS2	0.932773	1.74016	Slco5a1	0.0291	0.0166	0.0187	0.0112	0.0145	0.0154	0.0234	0.0217	0.0189	0.019	0.0279	0.0237	0.00603021	0.00636885	0.00632008	0.00674847	cUMR	2985	4	FALSE	FALSE	E14-DS21450 mESC_F4WT-DS17060 ZhBTc4-DS15236 mMesoderm-DS18198	None
chr1	12981529	12983661	73921	IM	M	0.0204	0.0268	0.0114	None	0.0193	Other	0.761194	1.69298	Tram1	0.0348	0.0158	0.0192	0.0119	0.0116	0.0098	0.0224	0.0193	0.0155	0.0155	0.0249	0.0229	0.00603021	0.00636885	0.00632008	0.00674847	cUMR	2985	5	FALSE	FALSE	mPATSKI-DS15697 mCD19-DS16168 mMesoderm-DS18198 mPATSKI-DS15697 mMuscle_Skeletal-DS18130 mPATSKI-DS15697 E14-DS21450	None
chr1	12984699	12986031	73922	IM	M	0.0253	0.0225	0.0162	None	0.0236	Other	1.12444	1.45679	Tram1	0.0206	0.0266	0.0226	0.018	0.0133	0.0137	0.0264	0.0243	0.0229	0.0236	0.0239	0.0231	0.00603021	0.00636885	0.00632008	0.00674847	None	0	2	FALSE	FALSE	ZhBTc4-DS17562 mCJ7-DS13320	None
chr1	12987500	12988580	73923	IM	IM	0.023	0.0254	0.0165	None	0.025	Other	0.905512	1.51515	Tram1	0.0266	0.0256	0.0224	0.0166	0.0149	0.0174	0.0236	0.0252	0.0185	0.0243	0.024	0.028	0.00603021	0.00636885	0.00632008	0.00674847	None	0	2	FALSE	FALSE	m416B-DS14099 ZhBTc4-DS17562	None
chr1	12988863	12989126	73924	M	None	0.0214	0.0193	0.0157	None	0.0196	Other	1.10881	1.24841	Tram1	0.0214	0.0189	0.0146	0.0154	0.0175	0.0149	0.0225	0.0176	0.0226	0.0211	0.0195	0.0157	0.00603021	0.00636885	0.00632008	0.00674847	None	0	2	FALSE	FALSE	mESC_F4WT-DS17060 mMuscle_Skeletal-DS18130	None
chr1	12994418	12994758	73925	M	None	0.0204	0.0124	0.0139	None	0.0162	Other	1.64516	1.16547	Tram1	0.0121	0.0081	0.0181	0.0125	0.0163	0.0154	0.02	0.0178	0.0248	0.014	0.0182	0.0197	0.00603021	0.00636885	0.00632008	0.00674847	None	0	0	FALSE	FALSE		None
chr1	12994953	12995409	73926	M	None	0.0199	0.0161	0.0151	None	0.0155	Other	1.23602	1.02649	Tram1	0.0147	0.0198	0.0153	0.0156	0.0137	0.0149	0.0178	0.0223	0.0236	0.0156	0.0132	0.0176	0.00603021	0.00636885	0.00632008	0.00674847	None	0	1	FALSE	FALSE	CH12-DS22542	None
chr1	12995797	12996073	73927	M	None	0.0194	0.0164	0.0158	None	0.0157	Other	1.18293	0.993671	Tram1	0.0179	0.0123	0.0171	0.0161	0.0131	0.0174	0.0202	0.0203	0.0158	0.0187	0.0152	0.0087	0.00603021	0.00636885	0.00632008	0.00674847	None	0	1	FALSE	FALSE	ZhBTc4-DS17562	None
chr1	13040213	13040673	73928	I	I	0.0104	0.0239	0.022	None	0.0174	Other	0.435146	0.790909	Tram1	0.0271	0.022	0.0183	0.0218	0.0237	0.0208	0.0095	0.0111	0.0128	0.0166	0.0184	0.0185	0.00603021	0.00636885	0.00632008	0.00674847	None	0	2	FALSE	FALSE	mMesoderm-DS18198 mGenitalFatPad-DS18780	None
chr1	13042012	13042674	73929	None	I	0.0078	0.0175	0.0246	None	0.0141	Other	0.445714	0.573171	Tram1	0.0194	0.0103	0.0211	0.026	0.026	0.0195	0.0056	0.0084	0.0138	0.0127	0.0168	0.0148	0.00603021	0.00636885	0.00632008	0.00674847	None	0	2	FALSE	FALSE	mPATSKI-DS15697 mA20-DS16695	None
chr1	13048337	13049877	73930	IM	M	0.0267	0.0221	0.0182	None	0.0244	Other	1.20814	1.34066	Tram1	0.0223	0.021	0.0227	0.0173	0.0202	0.0191	0.0251	0.0321	0.0252	0.0239	0.0279	0.0217	0.00603021	0.00636885	0.00632008	0.00674847	None	0	3	FALSE	FALSE	ZhBTc4-DS15236 mCJ7-DS13320 mESC_FIKO-DS17063	None
chr1	13053329	13053580	73931	I	None	0.0139	0.0216	0.013	None	0.0185	Other	0.643519	1.42308	Tram1	0.0211	0.0237	0.0203	0.0129	0.0124	0.0135	0.0108	0.0218	0.0145	0.0187	0.0187	0.0179	0.00603021	0.00636885	0.00632008	0.00674847	None	0	0	FALSE	FALSE		None
chr1	13057136	13058206	73932	IM	M	0.0215	0.0265	0.0158	None	0.0286	Other	0.811321	1.81013	Tram1	0.0286	0.023	0.0249	0.0164	0.0165	0.0137	0.02	0.024	0.0233	0.0283	0.0306	0.0271	0.00603021	0.00636885	0.00632008	0.00674847	None	0	0	FALSE	FALSE		None
chr1	13092769	13093319	73933	M	None	0.0225	0.0231	0.0126	None	0.0191	Other	0.974026	1.51587	Tram1	0.0264	0.0204	0.0178	0.0135	0.0123	0.0104	0.0223	0.0257	0.0195	0.0141	0.0255	0.0246	0.00603021	0.00636885	0.00632008	0.00674847	None	0	0	FALSE	FALSE		None
chr1	13093785	13094454	73934	IM	M	0.0191	0.0219	0.0144	None	0.0289	Other	0.872146	2.00694	Tram1	0.0263	0.0153	0.0183	0.0148	0.0103	0.0167	0.0212	0.0196	0.012	0.0302	0.0278	0.0268	0.00603021	0.00636885	0.00632008	0.00674847	None	0	3	FALSE	FALSE	mKidney-DS13948 mCJ7-DS13320 ZhBTc4-DS17562	None
chr1	13095244	13095496	73935	M	None	0.0204	0.0219	0.0126	None	0.0274	Other	0.931507	2.1746	Tram1	0.0281	0.013	0.0166	0.012	0.0105	0.0162	0.0203	0.022	0.0186	0.0266	0.0302	0.0263	0.00603021	0.00636885	0.00632008	0.00674847	None	0	1	FALSE	FALSE	mMesoderm-DS18198	None
chr1	13109798	13110804	73936	M	None	0.0234	0.0208	0.0152	None	0.0218	Other	1.125	1.43421	Prdm14	0.0193	0.0253	0.0197	0.0135	0.0179	0.0176	0.0244	0.0293	0.0135	0.0223	0.0227	0.0195	0.00603021	0.00636885	0.00632008	0.00674847	None	0	0	FALSE	FALSE		None
chr1	13111373	13112293	73937	M	None	0.0226	0.0201	0.0125	None	0.0188	Other	1.12438	1.504	Prdm14	0.02	0.0242	0.0156	0.0142	0.0081	0.0113	0.0261	0.0199	0.0149	0.017	0.024	0.0179	0.00603021	0.00636885	0.00632008	0.00674847	None	0	0	FALSE	FALSE		None
chr1	13116430	13117561	73938	I	None	0.0193	0.0269	0.0127	None	0.0227	AllTSS2	0.717472	1.7874	Prdm14	0.0361	0.0131	0.0197	0.0122	0.0132	0.0136	0.0189	0.0202	0.0193	0.0239	0.0209	0.0215	0.00603021	0.00636885	0.00632008	0.00674847	None	0	4	FALSE	FALSE	mATn-DS17070 mfBrain-DS14536 mMesoderm-DS18198 mMesoderm-DS18198 mATr-DS20149	None
chr1	13117801	13118941	73939	IM	M	0.024	0.0266	0.014	None	0.0247	Other	0.902256	1.76429	Tram1	0.0324	0.0208	0.0186	0.0136	0.0141	0.015	0.0223	0.0227	0.031	0.0224	0.0297	0.025	0.00603021	0.00636885	0.00632008	0.00674847	cUMR	1373	3	FALSE	FALSE	mCJ7-DS13320 mCJ7-DS13320 mfBrain-DS14536 mESC_FIKO-DS17063	None
chr1	13119505	13119993	73940	M	None	0.0224	0.0179	0.0147	None	0.0196	Other	1.2514	1.33333	Tram1	0.0146	0.0262	0.0167	0.0135	0.024	0.0104	0.024	0.0213	0.0186	0.017	0.0267	0.0185	0.00603021	0.00636885	0.00632008	0.00674847	None	0	0	FALSE	FALSE		None
chr1	13120507	13120977	73941	M	None	0.0212	0.0133	0.0131	None	0.0153	Other	1.59398	1.16794	Tram1	0.0151	0.0107	0.012	0.0136	0.0173	0.0081	0.023	0.0189	0.0182	0.0129	0.0176	0.0188	0.00603021	0.00636885	0.00632008	0.00674847	None	0	2	FALSE	FALSE	mESC_FIKO-DS17063 mCJ7-DS13320	None
chr1	13122259	13122587	73942	M	None	0.0223	0.0229	0.0155	None	0.0249	Other	0.973799	1.60645	Tram1	0.0218	0.0227	0.026	0.0127	0.0187	0.0207	0.0225	0.0213	0.023	0.0242	0.0208	0.0312	0.00603021	0.00636885	0.00632008	0.00674847	None	0	2	FALSE	FALSE	ZhBTc4-DS17562 mCJ7-DS13320	None
chr1	13123495	13124011	73943	IM	None	0.0217	0.022	0.0166	None	0.0218	Other	0.986364	1.31325	Tram1	0.0273	0.0143	0.0175	0.018	0.0139	0.0148	0.0223	0.0216	0.0199	0.0223	0.0227	0.0194	0.00603021	0.00636885	0.00632008	0.00674847	None	0	1	FALSE	FALSE	mFatPad-DS14021	None
chr1	13124155	13124885	73944	IM	IM	0.0201	0.0229	0.024	None	0.0284	Other	0.877729	1.18333	Tram1	0.0224	0.0259	0.0209	0.0242	0.0262	0.0216	0.0178	0.0231	0.0238	0.0265	0.0296	0.0318	0.00603021	0.00636885	0.00632008	0.00674847	None	0	1	FALSE	FALSE	CH12-DS22542	None
chr1	13125669	13126401	73945	IM	M	0.0232	0.0251	0.0209	None	0.028	Other	0.924303	1.33971	Tram1	0.028	0.019	0.025	0.0199	0.0227	0.0223	0.0226	0.0268	0.0208	0.0282	0.0297	0.026	0.00603021	0.00636885	0.00632008	0.00674847	None	0	3	FALSE	FALSE	m416B-DS14099 MEL-DS13036 CH12-DS22542	None
chr1	13134107	13134600	73946	IM	None	0.0191	0.0234	0.0164	None	0.0229	Enhancer4	0.816239	1.39634	Ncoa2	0.0237	0.0179	0.0292	0.0148	0.0115	0.0251	0.0183	0.0222	0.0179	0.0232	0.0206	0.0246	0.00603021	0.00636885	0.00632008	0.00674847	None	0	1	FALSE	FALSE	mfLiver_F2-DS20994	None
chr1	13135219	13136440	73947	IM	M	0.0234	0.0271	0.017	None	0.0246	Other	0.863469	1.44706	Ncoa2	0.0277	0.0257	0.027	0.0172	0.0134	0.0196	0.0239	0.0238	0.0215	0.0243	0.0259	0.024	0.00603021	0.00636885	0.00632008	0.00674847	None	0	3	FALSE	FALSE	mKidney-DS13948 mHeart-DS17909 mESC_FIKO-DS17063	None
chr1	13136845	13137158	73948	IM	None	0.0212	0.027	0.0169	None	0.0225	Other	0.785185	1.33136	Ncoa2	0.0299	0.0212	0.0265	0.0176	0.013	0.0182	0.0218	0.028	0.0112	0.024	0.0248	0.0164	0.00603021	0.00636885	0.00632008	0.00674847	None	0	1	FALSE	FALSE	mCJ7-DS13320	None
chr1	13141005	13142086	73949	IM	I	0.0157	0.0245	0.0271	None	0.0185	AllTSS2	0.640816	0.682657	Ncoa2	0.0279	0.018	0.0236	0.0299	0.0262	0.02	0.0151	0.0202	0.0123	0.0157	0.0209	0.0229	0.00603021	0.00636885	0.00632008	0.00674847	None	0	3	FALSE	FALSE	CH12-DS22542 mATr-DS20149 mMuscle_Skeletal-DS18130	None
chr1	13143333	13143593	73950	None	I	0.0059	0.0109	0.0243	None	0.0127	Enhancer4	0.541284	0.522634	Ncoa2	0.0127	0.0097	0.008	0.028	0.0186	0.0184	0.004	0.0108	0.0062	0.0114	0.0147	0.0138	0.00603021	0.00636885	0.00632008	0.00674847	None	0	1	FALSE	FALSE	m416B-DS14099	None
chr1	13144244	13145527	73951	I	IM	0.0155	0.0391	0.0603	I	0.0244	Enhancer4	0.396419	0.404643	Ncoa2	0.0332	0.0448	0.0473	0.0616	0.0518	0.0639	0.0141	0.0209	0.0135	0.0205	0.0288	0.0293	0.00603021	0.00636885	0.00632008	0.00674847	None	0	2	FALSE	FALSE	mGER-DS15420 m416B-DS14099	None
chr1	13149803	13150475	73952	IM	None	0.0239	0.0268	0.0165	None	0.018	Other	0.891791	1.09091	Ncoa2	0.0287	0.0228	0.0266	0.016	0.0183	0.0163	0.0254	0.0256	0.0172	0.016	0.0223	0.0183	0.00603021	0.00636885	0.00632008	0.00674847	None	0	0	FALSE	FALSE		None
chr1	13151375	13151651	73953	M	None	0.0221	0.0191	0.0173	None	0.0195	Other	1.15707	1.12717	Ncoa2	0.0161	0.0261	0.0184	0.0183	0.0147	0.0166	0.0243	0.0228	0.0143	0.0161	0.0232	0.024	0.00603021	0.00636885	0.00632008	0.00674847	None	0	1	FALSE	FALSE	mATn-DS17070	None
chr1	13162766	13163064	73954	None	I	0.0156	0.017	0.0273	None	0.0175	Enhancer4	0.917647	0.641026	Ncoa2	0.0168	0.0197	0.0144	0.0326	0.0117	0.0255	0.0169	0.0166	0.0103	0.0137	0.0227	0.0214	0.00603021	0.00636885	0.00632008	0.00674847	None	0	1	FALSE	FALSE	CH12-DS22542	None
chr1	13164472	13165298	73955	IM	None	0.0215	0.0244	0.0162	None	0.0217	Other	0.881148	1.33951	Ncoa2	0.0301	0.0148	0.0211	0.0167	0.0173	0.0137	0.0211	0.0249	0.0187	0.0218	0.0229	0.0203	0.00603021	0.00636885	0.00632008	0.00674847	None	0	0	FALSE	FALSE		None
chr1	13173436	13174076	73956	M	None	0.023	0.0191	0.013	None	0.0195	Other	1.20419	1.5	Ncoa2	0.016	0.0267	0.0178	0.0133	0.0123	0.0125	0.0154	0.0201	0.0503	0.0168	0.0305	0.0146	0.00603021	0.00636885	0.00632008	0.00674847	None	0	1	FALSE	FALSE	mfBrain-DS14536	None
chr1	13177162	13177493	73957	None	M	0.0184	0.0176	0.0145	None	0.0282	Other	1.04545	1.94483	Ncoa2	0.0209	0.013	0.0147	0.0127	0.0176	0.0172	0.0175	0.023	0.0159	0.0288	0.0323	0.0225	0.00603021	0.00636885	0.00632008	0.00674847	None	0	0	FALSE	FALSE		None
chr1	13178312	13179040	73958	None	I	0.0164	0.0181	0.0311	None	0.0175	Enhancer4	0.906077	0.562701	Ncoa2	0.0178	0.0173	0.0196	0.0316	0.0334	0.0279	0.0157	0.0176	0.017	0.0175	0.0209	0.014	0.00603021	0.00636885	0.00632008	0.00674847	None	0	4	FALSE	FALSE	mTN-DS16171 mMuscle_Skeletal-DS18130 mPATSKI-DS15697 mfLiver_F1-DS20991	None
chr1	13184904	13185287	73959	None	I	0.0061	0.0104	0.0285	None	0.0123	Enhancer4	0.586538	0.431579	Ncoa2	0.01	0.0141	0.0071	0.0242	0.0365	0.0338	0.0074	0.0049	0.0031	0.0119	0.0133	0.0125	0.00603021	0.00636885	0.00632008	0.00674847	None	0	1	FALSE	FALSE	mCerebrum-DS14024	None
chr1	13193247	13194414	73960	I	I	0.0161	0.0271	0.0331	I	0.0161	Enhancer4	0.594096	0.486405	Ncoa2	0.0269	0.0254	0.0297	0.028	0.0441	0.0383	0.0154	0.015	0.0195	0.0137	0.0199	0.0181	0.00603021	0.00636885	0.00632008	0.00674847	None	0	3	FALSE	FALSE	CH12-DS22542 mPATSKI-DS15697 mRetina-DS20000	None
chr1	13224375	13224915	73961	IM	None	0.0216	0.0214	0.0211	None	0.0187	Enhancer4	1.00935	0.886256	Ncoa2	0.0202	0.0218	0.0242	0.0218	0.0181	0.0217	0.0151	0.029	0.0334	0.0178	0.0201	0.0193	0.00603021	0.00636885	0.00632008	0.00674847	None	0	1	FALSE	FALSE	mLiver-DS14005	None
chr1	13225831	13226131	73962	M	None	0.0223	0.017	0.0169	None	0.0214	Enhancer4	1.31176	1.26627	Ncoa2	0.0154	0.0194	0.0184	0.0164	0.0173	0.0179	0.0193	0.0295	0.0236	0.0209	0.0237	0.0203	0.00603021	0.00636885	0.00632008	0.00674847	None	0	0	FALSE	FALSE		None
chr1	13234643	13235317	73963	I	None	0.0105	0.0339	0.0149	I	0.0102	Enhancer4	0.309735	0.684564	Ncoa2	0.0303	0.0287	0.0492	0.0125	0.0154	0.0215	0.0084	0.0142	0.0126	0.0122	0.0077	0.008	0.00603021	0.00636885	0.00632008	0.00674847	None	0	2	FALSE	FALSE	mLung-DS14479 mGER-DS15420	None
chr1	13235797	13236220	73964	None	I	0.0061	0.0129	0.03	None	0.0138	Enhancer4	0.472868	0.46	Ncoa2	0.0141	0.0102	0.0129	0.0344	0.0289	0.0188	0.0047	0.0069	0.0096	0.0152	0.0101	0.0141	0.00603021	0.00636885	0.00632008	0.00674847	None	0	1	FALSE	FALSE	mHindlimbsBuds-DS18279	None
chr1	13242205	13242624	73965	M	None	0.024	0.023	0.0154	None	0.0214	Enhancer4	1.04348	1.38961	Ncoa2	0.0205	0.026	0.0258	0.0154	0.0153	0.0155	0.0229	0.026	0.025	0.0195	0.0237	0.0238	0.00603021	0.00636885	0.00632008	0.00674847	None	0	0	FALSE	FALSE		None
chr1	13246055	13246883	73966	None	IM	0.0176	0.0222	0.046	None	0.025	Enhancer4	0.792793	0.543478	Ncoa2	0.0191	0.0188	0.034	0.0579	0.0256	0.0296	0.0162	0.0164	0.0235	0.0218	0.0258	0.0319	0.00603021	0.00636885	0.00632008	0.00674847	None	0	2	FALSE	FALSE	mGER-DS15420 mfLiver_F1-DS20991	None
chr1	13250908	13251468	73969	I	None	0.0213	0.0287	0.0233	None	0.022	Enhancer4	0.74216	0.944206	Ncoa2	0.0228	0.0388	0.0316	0.0252	0.0178	0.0226	0.0201	0.0212	0.0253	0.0193	0.0303	0.0199	0.00603021	0.00636885	0.00632008	0.00674847	None	0	1	FALSE	FALSE	mGER-DS15420	None
chr1	13265092	13265343	73970	M	None	0.023	0.0121	0.0141	None	0.0166	Enhancer4	1.90083	1.1773	Ncoa2	0.0141	0.009	0.0108	0.0126	0.0136	0.0189	0.0227	0.0195	0.0281	0.0186	0.0145	0.0139	0.00603021	0.00636885	0.00632008	0.00674847	None	0	0	FALSE	FALSE		None
chr1	13277416	13278152	73971	IM	M	0.0234	0.0288	0.0219	None	0.0245	Enhancer4	0.8125	1.11872	Ncoa2	0.0284	0.0268	0.0324	0.0226	0.0164	0.0242	0.0246	0.0218	0.0216	0.0243	0.0241	0.0254	0.00603021	0.00636885	0.00632008	0.00674847	None	0	1	FALSE	FALSE	mLiver-DS14005	None
chr1	13281605	13282220	73972	None	I	0.0186	0.0175	0.0339	None	0.0246	Enhancer4	1.06286	0.725664	Ncoa2	0.0172	0.0155	0.0207	0.0384	0.0332	0.0219	0.0188	0.0177	0.019	0.0239	0.0232	0.0281	0.00603021	0.00636885	0.00632008	0.00674847	None	0	1	FALSE	FALSE	mGER-DS15420	None
chr1	13283307	13283806	73973	I	I	0.0208	0.032	0.0321	None	0.0195	Enhancer4	0.65	0.607477	Ncoa2	0.0323	0.0272	0.0369	0.04	0.0206	0.0197	0.0236	0.0159	0.0179	0.0169	0.0219	0.0232	0.00603021	0.00636885	0.00632008	0.00674847	None	0	2	FALSE	FALSE	mGER-DS15420 mATr-DS20149	None
chr1	13285592	13286029	73974	I	None	0.0114	0.0312	0.0272	None	0.0163	Enhancer4	0.365385	0.599265	Ncoa2	0.0252	0.0391	0.0373	0.0312	0.0287	0.0148	0.0097	0.0126	0.0157	0.0171	0.0173	0.013	0.00603021	0.00636885	0.00632008	0.00674847	None	0	2	FALSE	FALSE	mGER-DS15420 mTN-DS16171	None
chr1	13291554	13292159	73975	IM	None	0.0261	0.0267	0.0187	None	0.0251	Enhancer4	0.977528	1.34225	Ncoa2	0.0306	0.0241	0.0198	0.0191	0.0159	0.0201	0.0223	0.0369	0.0255	0.0259	0.0284	0.0199	0.00603021	0.00636885	0.00632008	0.00674847	None	0	3	FALSE	FALSE	mIntestine_Large-DS19140 mPATSKI-DS15697 mKidney-DS13948	None
chr1	13293954	13294440	73976	I	None	0.0173	0.0299	0.0187	None	0.0196	Enhancer4	0.578595	1.04813	Ncoa2	0.0288	0.0332	0.0292	0.0196	0.0149	0.0195	0.0171	0.0221	0.0124	0.0188	0.0199	0.0214	0.00603021	0.00636885	0.00632008	0.00674847	None	0	3	FALSE	FALSE	mKidney-DS13948 mMesoderm-DS18198 mfLiver_DLCR-DS19241	None
chr1	13313089	13314118	73977	I	None	0.0214	0.0364	0.0176	None	0.023	Enhancer4	0.587912	1.30682	Ncoa2	0.0308	0.0461	0.0393	0.0194	0.0109	0.0181	0.0201	0.0236	0.0231	0.019	0.0263	0.0293	0.00603021	0.00636885	0.00632008	0.00674847	None	0	1	FALSE	FALSE	mLiver-DS14005	None
chr1	13318445	13319030	73978	None	I	0.0153	0.0176	0.0288	None	0.0174	Enhancer4	0.869318	0.604167	Ncoa2	0.0137	0.0231	0.0208	0.0326	0.0208	0.0248	0.0156	0.0113	0.0189	0.0134	0.0213	0.0231	0.00603021	0.00636885	0.00632008	0.00674847	None	0	2	FALSE	FALSE	mA20-DS16695 mTN-DS16171	None
chr1	13322452	13323215	73979	I	I	0.0221	0.0283	0.038	None	0.0256	Enhancer4	0.780919	0.673684	Ncoa2	0.0253	0.0298	0.034	0.0462	0.0209	0.0295	0.0228	0.0214	0.0206	0.0232	0.0339	0.0229	0.00603021	0.00636885	0.00632008	0.00674847	None	0	2	FALSE	FALSE	mRetina-DS20000 ZhBTc4-DS15236	None
chr1	13325844	13326901	73980	I	IM	0.0162	0.0251	0.0406	None	0.0218	Enhancer4	0.645418	0.536946	Ncoa2	0.0252	0.0286	0.0205	0.0504	0.0236	0.0273	0.0156	0.0157	0.0184	0.0155	0.0303	0.0285	0.00603021	0.00636885	0.00632008	0.00674847	None	0	2	FALSE	FALSE	mTN-DS16171 mA20-DS16695 mA20-DS16695	None
chr1	13327380	13327877	73981	None	I	0.0143	0.0117	0.0214	None	0.0133	Enhancer4	1.22222	0.621495	Ncoa2	0.0126	0.0095	0.0122	0.0247	0.0108	0.0211	0.0138	0.0158	0.0142	0.0126	0.0141	0.0141	0.00603021	0.00636885	0.00632008	0.00674847	None	0	1	FALSE	FALSE	mA20-DS16695	None
chr1	13337267	13337932	73982	IM	I	0.0209	0.0275	0.0351	None	0.0219	Enhancer4	0.76	0.623932	Ncoa2	0.0235	0.0294	0.0353	0.0405	0.0231	0.0299	0.0181	0.0269	0.0227	0.0199	0.0291	0.0194	0.00603021	0.00636885	0.00632008	0.00674847	None	0	1	FALSE	FALSE	mHeart-DS17909	None
chr1	13342866	13343282	73983	I	None	0.0146	0.0325	0.0153	None	0.0151	Enhancer4	0.449231	0.986928	Ncoa2	0.0262	0.0326	0.0482	0.0149	0.0175	0.0147	0.0115	0.0197	0.0185	0.0191	0.0091	0.0112	0.00603021	0.00636885	0.00632008	0.00674847	None	0	1	FALSE	FALSE	mGER-DS15420	None
chr1	13348971	13349487	73984	I	None	0.0167	0.0286	0.0197	None	0.0165	Enhancer4	0.583916	0.837563	Ncoa2	0.0204	0.0353	0.0418	0.0191	0.0213	0.0203	0.0172	0.0157	0.0163	0.015	0.0188	0.0176	0.00603021	0.00636885	0.00632008	0.00674847	None	0	1	FALSE	FALSE	mGER-DS15420	None
chr1	13350524	13351348	73985	None	I	0.0159	0.0197	0.0408	None	0.0205	Enhancer4	0.807107	0.502451	Ncoa2	0.019	0.021	0.02	0.0483	0.0288	0.0297	0.0127	0.022	0.0186	0.0179	0.0234	0.0238	0.00603021	0.00636885	0.00632008	0.00674847	None	0	1	FALSE	FALSE	mA20-DS16695 mA20-DS16695 mA20-DS16695	None
chr1	13361706	13366367	73986	IM	IM	0.0868	0.0918	0.0688	None	0.0666	AllTSS2	0.945534	0.968023	Ncoa2	0.0975	0.0879	0.0816	0.0836	0.031	0.0586	0.106	0.0551	0.0639	0.0642	0.0756	0.063	0.00603021	0.00636885	0.00632008	0.00674847	cUMR	3184	11	FALSE	FALSE	E14-DS21450 mTN-DS16171 mGER-DS15400 mBrain-DS12727 mRetina-DS19060 mTN-DS16171 mATn-DS17070 mPATSKI-DS15697 mMesoderm-DS18198 mPATSKI-DS15697 mTR-DS17864 m3134-DS8497 mLung-DS14479 mTN-DS16171 mLung-DS14479	None
chr1	13378859	13379213	73987	M	None	0.0257	0.0175	0.0189	None	0.0202	Enhancer4	1.46857	1.06878	Tram1	0.0137	0.0201	0.0238	0.0193	0.0206	0.0167	0.0259	0.0239	0.0269	0.0205	0.0195	0.0203	0.00603021	0.00636885	0.00632008	0.00674847	None	0	1	FALSE	FALSE	mATn-DS17070	None
chr1	13397560	13398121	73988	M	M	0.0239	0.0194	0.0173	None	0.0257	Other	1.23196	1.48555	Tram1	0.0235	0.0127	0.0169	0.0189	0.0128	0.0163	0.0224	0.0295	0.0223	0.0234	0.0265	0.0307	0.00603021	0.00636885	0.00632008	0.00674847	None	0	2	FALSE	FALSE	mESC_F4WT-DS17060 mCJ7-DS13320	None
chr1	13414402	13415059	73989	None	I	0.0141	0.0119	0.0259	None	0.0152	Enhancer4	1.18487	0.586873	Tram1	0.0137	0.0085	0.0114	0.027	0.0333	0.0166	0.0154	0.0155	0.0082	0.0097	0.0251	0.0186	0.00603021	0.00636885	0.00632008	0.00674847	None	0	1	FALSE	FALSE	mA20-DS16695	None
chr1	13416231	13417528	73990	I	IM	0.0153	0.0323	0.0403	None	0.026	Other	0.473684	0.645161	Tram1	0.0348	0.0297	0.0293	0.0463	0.0275	0.0341	0.0146	0.0191	0.0129	0.0233	0.0312	0.0271	0.00603021	0.00636885	0.00632008	0.00674847	None	0	3	FALSE	FALSE	CH12-DS22542 CH12-DS22542 mTR-DS17864 mATr-DS20149 mATr-DS20149	None
chr1	13444728	13445035	73991	None	I	0.0168	0.0203	0.0283	None	0.0193	Other	0.827586	0.681979	Tram1	0.0189	0.0214	0.0224	0.0268	0.03	0.0312	0.0159	0.019	0.0171	0.0178	0.0147	0.0279	0.00603021	0.00636885	0.00632008	0.00674847	None	0	1	FALSE	FALSE	CH12-DS22542	None
chr1	13490460	13491100	73992	I	I	0.013	0.0275	0.0328	None	0.0157	Other	0.472727	0.478659	Tram1	0.025	0.0334	0.0269	0.0336	0.0267	0.0357	0.0102	0.0157	0.0184	0.0156	0.0185	0.0127	0.00603021	0.00636885	0.00632008	0.00674847	None	0	1	FALSE	FALSE	CH12-DS22542	None
chr1	13492863	13493249	73993	M	None	0.0242	0.0234	0.0168	None	0.017	Other	1.03419	1.0119	Tram1	0.0278	0.0205	0.0155	0.016	0.0117	0.0234	0.0235	0.0225	0.0282	0.0188	0.0165	0.0132	0.00603021	0.00636885	0.00632008	0.00674847	None	0	0	FALSE	FALSE		None
chr1	13503701	13504516	73994	I	IM	0.014	0.0338	0.0368	I	0.0227	Enhancer4	0.414201	0.616848	Tram1	0.0376	0.0233	0.0364	0.0371	0.0326	0.0393	0.0131	0.0199	0.0099	0.0186	0.0288	0.0264	0.00603021	0.00636885	0.00632008	0.00674847	None	0	2	FALSE	FALSE	mGER-DS15400 mCJ7-DS13320	None
chr1	13520923	13523576	73995	IM	IM	0.0259	0.0386	0.031	None	0.028	Enhancer4	0.670984	0.903226	Tram1	0.0392	0.0349	0.0414	0.0317	0.0263	0.0328	0.0241	0.0337	0.022	0.0205	0.0412	0.033	0.00603021	0.00636885	0.00632008	0.00674847	None	0	8	FALSE	FALSE	mGER-DS15420 mMuscle_Skeletal-DS18130 CH12-DS22542 mKidney-DS13948 mfLiver_F2-DS20994 mESC_F4WT-DS17060 E14-DS21450 mCJ7-DS13320	None
chr1	13523673	13524122	73996	M	None	0.0238	0.0218	0.0186	None	0.0262	Enhancer4	1.09174	1.4086	Tram1	0.0189	0.0262	0.0238	0.02	0.0104	0.0214	0.0267	0.021	0.0177	0.0247	0.0341	0.0217	0.00603021	0.00636885	0.00632008	0.00674847	None	0	1	FALSE	FALSE	mCJ7-DS13320	None
chr1	13553685	13554021	73997	None	I	0.0188	0.0232	0.0299	None	0.0258	Enhancer4	0.810345	0.862876	Tram1	0.018	0.0272	0.0317	0.0341	0.0247	0.0223	0.0201	0.0218	0.0108	0.0257	0.0282	0.0236	0.00603021	0.00636885	0.00632008	0.00674847	None	0	1	FALSE	FALSE	mLiver-DS14005	None
chr1	13556115	13557108	73998	I	IM	0.0183	0.036	0.0491	I	0.026	Enhancer4	0.508333	0.529532	Tram1	0.0284	0.0482	0.041	0.0525	0.0385	0.0483	0.0164	0.024	0.0175	0.0199	0.0309	0.0361	0.00603021	0.00636885	0.00632008	0.00674847	None	0	2	FALSE	FALSE	mfLiver-DS20666 mfLiver_F3-DS20937	None
chr1	13558590	13560550	73999	IM	IM	0.0268	0.0315	0.0262	None	0.0251	Enhancer4	0.850794	0.958015	Tram1	0.0302	0.0341	0.032	0.0292	0.0177	0.0247	0.0265	0.0317	0.0221	0.0221	0.0321	0.0254	0.00603021	0.00636885	0.00632008	0.00674847	None	0	3	FALSE	FALSE	mCerebrum-DS14024 mfLiver_F3-DS20937 mfLiver-DS20666	None
chr1	13561930	13562181	74000	M	None	0.0246	0.0248	0.0213	None	0.0264	Enhancer4	0.991935	1.23944	Tram1	0.0226	0.033	0.0206	0.0231	0.0169	0.0202	0.0249	0.0342	0.0122	0.0257	0.0285	0.0259	0.00603021	0.00636885	0.00632008	0.00674847	None	0	0	FALSE	FALSE		None
chr1	13562205	13563087	74001	IM	IM	0.0235	0.026	0.0445	None	0.0307	Enhancer4	0.903846	0.689888	Tram1	0.0275	0.0254	0.0228	0.0517	0.0326	0.0343	0.0222	0.0276	0.0225	0.0248	0.0339	0.0421	0.00603021	0.00636885	0.00632008	0.00674847	None	0	3	FALSE	FALSE	mB-DS17866 CH12-DS22542 mfLiver_F2-DS20994	None
chr1	13563605	13566094	74002	IM	IM	0.0269	0.0367	0.0692	I	0.0379	Enhancer4	0.73297	0.547688	Tram1	0.0313	0.0421	0.0443	0.0773	0.0486	0.0638	0.028	0.0263	0.0241	0.0325	0.0472	0.0416	0.00603021	0.00636885	0.00632008	0.00674847	None	0	10	FALSE	FALSE	mCJ7-DS13320 mfLiver_DLCR-DS19241 mfLiver_F5-DS20999 mGER-DS15420 mCD19-DS16168 mfLiver_F5-DS20999 mLiver-DS14005 mKidney-DS13948 mB-DS17866 mA20-DS16695 mSpleen-DS18870	None
chr1	13566725	13567124	74003	None	I	0.0219	0.0233	0.0328	None	0.024	Enhancer4	0.939914	0.731707	Tram1	0.0273	0.0131	0.025	0.0377	0.0213	0.0285	0.0203	0.0188	0.031	0.0241	0.0276	0.0201	0.00603021	0.00636885	0.00632008	0.00674847	None	0	1	FALSE	FALSE	mLiver-DS14005	None
chr1	13569105	13569374	74004	M	None	0.0246	0.0199	0.0244	None	0.0193	Other	1.23618	0.790984	Tram1	0.0198	0.0228	0.0169	0.0257	0.0216	0.0229	0.0251	0.0228	0.0252	0.0165	0.0167	0.029	0.00603021	0.00636885	0.00632008	0.00674847	None	0	1	FALSE	FALSE	mA20-DS16695	None
chr1	13573141	13573737	74005	I	None	0.0184	0.0304	0.0214	None	0.0197	Enhancer4	0.605263	0.920561	Tram1	0.0282	0.0287	0.0377	0.0224	0.0216	0.0186	0.0191	0.0198	0.0148	0.0172	0.0252	0.0201	0.00603021	0.00636885	0.00632008	0.00674847	None	0	0	FALSE	FALSE		None
chr1	13575343	13576396	74006	None	I	0.0152	0.0193	0.0383	None	0.0217	Enhancer4	0.787565	0.56658	Tram1	0.0195	0.018	0.0204	0.0431	0.0306	0.0312	0.014	0.0188	0.0149	0.0158	0.0302	0.0273	0.00603021	0.00636885	0.00632008	0.00674847	None	0	2	FALSE	FALSE	mGER-DS15410 mB-DS17866	None
chr1	13577863	13581615	74007	IM	IM	0.0685	0.0793	0.0549	I	0.0452	AllTSS2	0.863808	0.823315	Tram1	0.0826	0.0839	0.0656	0.066	0.0307	0.044	0.0873	0.0438	0.0385	0.04	0.0555	0.0474	0.00603021	0.00636885	0.00632008	0.00674847	cUMR	2024	9	FALSE	FALSE	mB-DS17866 mTN-DS16171 mGER-DS15410 mPATSKI-DS15697 mMesoderm-DS18198 mRetina-DS19060 mBrain-DS12727 mB-DS17866 mA20-DS16695 mATr-DS20149 mB-DS17866	None
chr1	13583202	13583838	74008	None	I	0.0117	0.0105	0.0336	None	0.0116	Other	1.11429	0.345238	Tram1	0.0088	0.0109	0.0144	0.0399	0.0235	0.0243	0.0107	0.0124	0.0138	0.0109	0.0109	0.014	0.00603021	0.00636885	0.00632008	0.00674847	None	0	3	FALSE	FALSE	m416B-DS14099 mCD19-DS16168 CH12-DS22542	None
chr1	13589670	13590902	74009	M	IM	0.0228	0.0215	0.0324	None	0.0243	Other	1.06047	0.75	Tram1	0.021	0.0205	0.024	0.0355	0.0261	0.0291	0.0205	0.0262	0.0257	0.0217	0.0298	0.0248	0.00603021	0.00636885	0.00632008	0.00674847	None	0	4	FALSE	FALSE	mPATSKI-DS15697 CH12-DS22542 m416B-DS14099 mThymus-DS18819	None
chr1	13594475	13594836	74010	M	None	0.0156	0.0151	0.0114	None	0.01	Other	1.03311	0.877193	Tram1	0.0164	0.014	0.013	0.0117	0.0102	0.0117	0.0151	0.0175	0.015	0.0072	0.0138	0.0128	0.00603021	0.00636885	0.00632008	0.00674847	None	0	1	FALSE	FALSE	mMuscle_Skeletal-DS18130	None
chr1	13632882	13633345	74011	M	None	0.0235	0.0193	0.0211	None	0.021	Other	1.21762	0.995261	Lactb2	0.0213	0.0162	0.018	0.0212	0.0216	0.0202	0.0252	0.0219	0.0202	0.0186	0.02	0.0281	0.00603021	0.00636885	0.00632008	0.00674847	None	0	1	FALSE	FALSE	mPATSKI-DS15697	None
chr1	13648841	13649482	74012	None	I	0.0171	0.0159	0.0317	None	0.0141	Enhancer4	1.07547	0.444795	Lactb2	0.013	0.0176	0.0211	0.0356	0.0233	0.0278	0.0175	0.0199	0.0127	0.0107	0.0179	0.0183	0.00603021	0.00636885	0.00632008	0.00674847	None	0	2	FALSE	FALSE	mPATSKI-DS15697 MEL-DS13036 mPATSKI-DS15697	None
chr1	13649625	13651543	74013	IM	IM	0.0471	0.071	0.0799	None	0.0441	AllTSS2	0.66338	0.55194	Lactb2	0.0662	0.0731	0.0806	0.0907	0.0506	0.0743	0.0535	0.0401	0.0352	0.0378	0.0538	0.0495	0.00603021	0.00636885	0.00632008	0.00674847	cUMR	1103	6	FALSE	FALSE	mA20-DS16695 m416B-DS14099 mPATSKI-DS15697 CH12-DS22542 mSpleen-DS18870 mESC_F4WT-DS17060	None
chr1	13657915	13658284	74014	None	I	0.0138	0.0203	0.0285	None	0.0177	Enhancer4	0.679803	0.621053	Lactb2	0.0193	0.0184	0.0249	0.0298	0.0291	0.0245	0.0144	0.0115	0.0148	0.0177	0.0207	0.0145	0.00603021	0.00636885	0.00632008	0.00674847	None	0	0	FALSE	FALSE		None
chr1	13658350	13659237	74015	None	I	0.0159	0.0155	0.0543	I	0.0187	AllTSS2	1.02581	0.344383	Xkr9	0.0141	0.0173	0.0168	0.0549	0.0531	0.0535	0.0164	0.0137	0.0171	0.0157	0.025	0.0199	0.00603021	0.00636885	0.00632008	0.00674847	None	0	1	FALSE	FALSE	mIntestine_Large-DS19140 mIntestine_Large-DS19140	None
chr1	13659623	13660174	74016	None	I	0.0163	0.0159	0.0292	None	0.0168	Enhancer4	1.02516	0.575342	Xkr9	0.0163	0.0146	0.0164	0.0305	0.0257	0.0287	0.0181	0.011	0.0169	0.0143	0.0167	0.023	0.00603021	0.00636885	0.00632008	0.00674847	None	0	1	FALSE	FALSE	mKidney-DS13948	None
chr1	13660817	13661138	74017	None	I	0.0172	0.0142	0.028	None	0.0129	Enhancer4	1.21127	0.460714	Xkr9	0.0114	0.0211	0.0132	0.034	0.0186	0.0192	0.0196	0.0164	0.0106	0.0141	0.0078	0.0151	0.00603021	0.00636885	0.00632008	0.00674847	None	0	1	FALSE	FALSE	MEL-DS13036	None
chr1	13687698	13688340	74018	I	I	0.0152	0.0242	0.0242	None	0.0138	Other	0.628099	0.570248	Xkr9	0.0203	0.0287	0.029	0.0242	0.0227	0.0257	0.0144	0.0151	0.0182	0.0108	0.0108	0.0245	0.00603021	0.00636885	0.00632008	0.00674847	None	0	2	FALSE	FALSE	CH12-DS22542 mCJ7-DS13320	None
chr1	13691523	13692998	74019	M	None	0.0163	0.0134	0.0112	None	0.0141	Other	1.21642	1.25893	Xkr9	0.0133	0.0139	0.0132	0.0112	0.0113	0.0111	0.0158	0.0167	0.0174	0.015	0.0134	0.0126	0.00603021	0.00636885	0.00632008	0.00674847	None	0	0	FALSE	FALSE		None
chr1	13695360	13695777	74020	M	M	0.0189	0.0159	0.0169	None	0.022	Other	1.18868	1.30178	Lactb2	0.0165	0.0151	0.0152	0.0153	0.0259	0.0141	0.0194	0.0208	0.0152	0.0216	0.0239	0.0207	0.00603021	0.00636885	0.00632008	0.00674847	None	0	0	FALSE	FALSE		None
chr1	13696169	13696975	74021	IM	IM	0.0182	0.0268	0.0366	None	0.0206	Other	0.679104	0.562842	Lactb2	0.0254	0.0301	0.0267	0.0398	0.0304	0.0326	0.0162	0.0211	0.0211	0.0147	0.0243	0.0312	0.00603021	0.00636885	0.00632008	0.00674847	None	0	1	FALSE	FALSE	mPATSKI-DS15697	None
chr1	13760297	13760677	74022	IM	None	0.0187	0.021	0.011	None	0.0201	Other	0.890476	1.82727	Lactb2	0.0241	0.0177	0.0171	0.0117	0.0063	0.0128	0.0178	0.0201	0.02	0.0228	0.0141	0.0195	0.00603021	0.00636885	0.00632008	0.00674847	None	0	0	FALSE	FALSE		None
chr1	13760772	13761945	74023	IM	IM	0.0305	0.0245	0.0197	None	0.0305	Other	1.2449	1.54822	Lactb2	0.0232	0.0286	0.0231	0.0198	0.018	0.0207	0.0286	0.0383	0.0275	0.0255	0.0414	0.0313	0.00603021	0.00636885	0.00632008	0.00674847	None	0	3	FALSE	FALSE	mHindlimbsBuds-DS18279 mSpleen-DS18870 ZhBTc4-DS17616	None
chr1	13763439	13764160	74024	M	None	0.02	0.0175	0.0111	None	0.018	Other	1.14286	1.62162	Lactb2	0.0196	0.0131	0.0174	0.012	0.0114	0.0083	0.0173	0.0233	0.0246	0.0194	0.0165	0.0163	0.00603021	0.00636885	0.00632008	0.00674847	None	0	0	FALSE	FALSE		None
chr1	13769999	13770250	74025	None	I	0.0148	0.0136	0.0189	None	0.0147	Other	1.08824	0.777778	Lactb2	0.0112	0.0137	0.0199	0.0209	0.0156	0.0161	0.0173	0.012	0.0105	0.0188	0.005	0.0147	0.00603021	0.00636885	0.00632008	0.00674847	None	0	0	FALSE	FALSE		None
chr1	13770404	13771136	74026	IM	I	0.0214	0.0172	0.0196	None	0.0189	Other	1.24419	0.964286	Lactb2	0.0163	0.0195	0.0169	0.0175	0.0219	0.0234	0.0202	0.0222	0.024	0.018	0.0177	0.0226	0.00603021	0.00636885	0.00632008	0.00674847	None	0	0	FALSE	FALSE		None
chr1	13771940	13772400	74027	M	M	0.0173	0.0158	0.0159	None	0.0247	Other	1.09494	1.55346	Lactb2	0.0162	0.0134	0.0179	0.0159	0.0184	0.0138	0.0142	0.0196	0.0241	0.0242	0.0244	0.0263	0.00603021	0.00636885	0.00632008	0.00674847	None	0	0	FALSE	FALSE		None
chr1	13772464	13773583	74028	IM	IM	0.0212	0.0201	0.0245	None	0.0268	Other	1.05473	1.09388	Lactb2	0.02	0.0201	0.0204	0.0238	0.0293	0.0226	0.0196	0.0255	0.0211	0.0286	0.0223	0.0273	0.00603021	0.00636885	0.00632008	0.00674847	None	0	1	FALSE	FALSE	mLung-DS14479	None
chr1	13773673	13775134	74029	IM	IM	0.0183	0.0303	0.0331	None	0.0237	Other	0.60396	0.716012	Lactb2	0.027	0.0344	0.0338	0.0363	0.0292	0.0276	0.0171	0.0203	0.0199	0.0216	0.0253	0.027	0.00603021	0.00636885	0.00632008	0.00674847	None	0	1	FALSE	FALSE	mPATSKI-DS15697	None
chr1	13779130	13779932	74031	I	IM	0.0142	0.0266	0.033	None	0.0243	Other	0.533835	0.736364	Lactb2	0.0285	0.0209	0.0287	0.0322	0.0351	0.0336	0.0147	0.0137	0.0134	0.0242	0.0238	0.0251	0.00603021	0.00636885	0.00632008	0.00674847	None	0	2	FALSE	FALSE	CH12-DS22542 ZhBTc4-DS17562	None
chr1	13790619	13791254	74032	IM	I	0.0213	0.0195	0.0181	None	0.0164	Other	1.09231	0.906077	Lactb2	0.0151	0.028	0.0206	0.0159	0.0231	0.0202	0.0212	0.0201	0.0232	0.013	0.0166	0.0248	0.00603021	0.00636885	0.00632008	0.00674847	None	0	0	FALSE	FALSE		None
chr1	13797638	13798276	74033	M	I	0.0176	0.0138	0.0183	None	0.0151	Other	1.27536	0.825137	Lactb2	0.0122	0.0139	0.0178	0.0144	0.0207	0.0272	0.0147	0.0234	0.0197	0.0167	0.0152	0.0111	0.00603021	0.00636885	0.00632008	0.00674847	None	0	2	FALSE	FALSE	mMesoderm-DS18198 mCD1-DS17129	None
chr1	13824669	13825303	74034	IM	None	0.0241	0.0197	0.0143	None	0.0186	Other	1.22335	1.3007	Lactb2	0.0207	0.02	0.0168	0.0146	0.0144	0.0136	0.0192	0.0215	0.0429	0.0156	0.0265	0.0176	0.00603021	0.00636885	0.00632008	0.00674847	None	0	2	FALSE	FALSE	mPATSKI-DS15697 mMesoderm-DS18198	None
chr1	13838521	13839324	74035	IM	M	0.0189	0.019	0.0168	None	0.0234	Other	0.994737	1.39286	Lactb2	0.023	0.0098	0.0195	0.0172	0.0162	0.0163	0.0205	0.012	0.022	0.0277	0.0209	0.0154	0.00603021	0.00636885	0.00632008	0.00674847	None	0	2	FALSE	FALSE	mHindlimbsBuds-DS18279 mPATSKI-DS15697	None
chr1	13839406	13839863	74036	M	None	0.0206	0.016	0.0141	None	0.0167	Other	1.2875	1.1844	Lactb2	0.016	0.0165	0.0155	0.0137	0.016	0.0138	0.0187	0.0236	0.0231	0.0186	0.0085	0.0206	0.00603021	0.00636885	0.00632008	0.00674847	None	0	1	FALSE	FALSE	mGenitalFatPad-DS18780	None
chr1	13840177	13840643	74037	M	None	0.0199	0.0158	0.013	None	0.0173	Other	1.25949	1.33077	Lactb2	0.0138	0.0183	0.0179	0.0125	0.0108	0.0162	0.0199	0.0162	0.0245	0.0168	0.0229	0.0129	0.00603021	0.00636885	0.00632008	0.00674847	None	0	0	FALSE	FALSE		None
chr1	13844468	13844811	74038	I	None	0.0179	0.0214	0.0132	None	0.023	Other	0.836449	1.74242	Lactb2	0.0169	0.0321	0.0204	0.0116	0.0156	0.016	0.0157	0.0232	0.0185	0.0241	0.0228	0.0203	0.00603021	0.00636885	0.00632008	0.00674847	None	0	1	FALSE	FALSE	ZhBTc4-DS17562	None
chr1	13848932	13850172	74039	IM	M	0.0223	0.0182	0.0149	None	0.0211	Other	1.22527	1.41611	Lactb2	0.0184	0.019	0.0171	0.0156	0.0169	0.0114	0.0244	0.0253	0.012	0.0223	0.0204	0.0189	0.00603021	0.00636885	0.00632008	0.00674847	None	0	2	FALSE	FALSE	mfBrain-DS14536 mHindlimbsBuds-DS18279 mHindlimbsBuds-DS18279	None
chr1	13854233	13854846	74040	IM	I	0.0203	0.0194	0.018	None	0.0166	Other	1.04639	0.922222	Lactb2	0.0218	0.016	0.0171	0.0181	0.019	0.0168	0.0232	0.0153	0.017	0.0162	0.0169	0.0172	0.00603021	0.00636885	0.00632008	0.00674847	None	0	0	FALSE	FALSE		None
chr1	13910162	13910877	74041	M	None	0.0218	0.0164	0.0163	None	0.0166	Other	1.32927	1.0184	Lactb2	0.0146	0.0175	0.0197	0.0167	0.0148	0.0164	0.0222	0.0188	0.0241	0.016	0.019	0.0155	0.00603021	0.00636885	0.00632008	0.00674847	None	0	0	FALSE	FALSE		None
chr1	13915740	13916222	74042	M	None	0.0204	0.0122	0.0139	None	0.013	Other	1.67213	0.935252	Lactb2	0.0138	0.0101	0.0108	0.0118	0.0173	0.017	0.0197	0.02	0.0229	0.0163	0.0067	0.0116	0.00603021	0.00636885	0.00632008	0.00674847	None	0	1	FALSE	FALSE	mPATSKI-DS15697	None
chr1	13918935	13919269	74043	M	None	0.0181	0.0088	0.0128	None	0.0107	Other	2.05682	0.835938	Lactb2	0.0088	0.0079	0.01	0.0111	0.0162	0.0144	0.018	0.0129	0.0247	0.0111	0.0103	0.0103	0.00603021	0.00636885	0.00632008	0.00674847	None	0	0	FALSE	FALSE		None
chr1	13927684	13928079	74044	None	I	0.0167	0.0118	0.0176	None	0.0155	Other	1.41525	0.880682	Lactb2	0.0123	0.0102	0.0122	0.0163	0.0203	0.0187	0.0173	0.0151	0.0167	0.0114	0.0215	0.0195	0.00603021	0.00636885	0.00632008	0.00674847	None	0	0	FALSE	FALSE		None
chr1	13956695	13957330	74045	M	None	0.0235	0.0141	0.0096	None	0.0126	Other	1.66667	1.3125	Lactb2	0.0103	0.0198	0.0172	0.0084	0.0121	0.0108	0.0186	0.0149	0.0494	0.0086	0.0167	0.0182	0.00603021	0.00636885	0.00632008	0.00674847	None	0	0	FALSE	FALSE		None
chr1	13968072	13968593	74046	M	None	0.0189	0.0101	0.0125	None	0.0144	Other	1.87129	1.152	Lactb2	0.0082	0.0144	0.0097	0.0114	0.0122	0.0156	0.0149	0.0193	0.0312	0.0159	0.0125	0.0127	0.00603021	0.00636885	0.00632008	0.00674847	None	0	0	FALSE	FALSE		None
chr1	13973622	13974102	74047	M	None	0.0177	0.0111	0.0126	None	0.013	Other	1.59459	1.03175	Lactb2	0.0076	0.0184	0.0116	0.0138	0.0155	0.0069	0.017	0.014	0.0239	0.0133	0.0138	0.0114	0.00603021	0.00636885	0.00632008	0.00674847	None	0	1	FALSE	FALSE	mLung-DS14479	None
chr1	13974619	13975071	74048	M	None	0.0205	0.013	0.0131	None	0.0153	Other	1.57692	1.16794	Lactb2	0.016	0.0106	0.0084	0.0123	0.0108	0.0174	0.0232	0.0134	0.0205	0.0155	0.0121	0.0183	0.00603021	0.00636885	0.00632008	0.00674847	None	0	1	FALSE	FALSE	mB-DS17866	None
chr1	14016969	14018057	74050	IM	None	0.0176	0.0177	0.0086	None	0.0158	Other	0.99435	1.83721	Lactb2	0.02	0.0137	0.0164	0.0091	0.0067	0.0088	0.0164	0.024	0.0141	0.0132	0.0202	0.0175	0.00603021	0.00636885	0.00632008	0.00674847	None	0	1	FALSE	FALSE	ZhBTc4-DS17616	None
chr1	14065756	14066405	74051	IM	IM	0.0257	0.0334	0.0269	None	0.0204	Other	0.769461	0.758364	Lactb2	0.0386	0.031	0.0228	0.0301	0.0223	0.0219	0.0263	0.0301	0.0185	0.021	0.0175	0.0221	0.00603021	0.00636885	0.00632008	0.00674847	None	0	1	FALSE	FALSE	mForelimbBuds-DS18275	None
chr1	14067127	14067386	74052	M	None	0.0193	0.0113	0.0106	None	0.0114	Other	1.70796	1.07547	Lactb2	0.0084	0.0177	0.0114	0.0111	0.0123	0.0079	0.0203	0.0131	0.0238	0.0093	0.0144	0.0135	0.00603021	0.00636885	0.00632008	0.00674847	None	0	0	FALSE	FALSE		None
chr1	14087917	14088183	74053	M	None	0.0205	0.0158	0.0135	None	0.0148	Other	1.29747	1.0963	Lactb2	0.017	0.0105	0.019	0.0131	0.0168	0.0117	0.0224	0.0165	0.0195	0.0156	0.011	0.0166	0.00603021	0.00636885	0.00632008	0.00674847	None	0	1	FALSE	FALSE	mMesoderm-DS18198	None
chr1	14090526	14091523	74054	IM	M	0.022	0.0173	0.0166	None	0.0229	Other	1.27168	1.37952	Lactb2	0.0169	0.0202	0.0147	0.0165	0.0169	0.0166	0.0208	0.0227	0.0249	0.0211	0.0262	0.024	0.00603021	0.00636885	0.00632008	0.00674847	None	0	2	FALSE	FALSE	CH12-DS22542 ZhBTc4-DS17562	None
chr1	14126221	14126527	74055	M	None	0.0201	0.0112	0.0135	None	0.0146	Other	1.79464	1.08148	Lactb2	0.0127	0.0101	0.0085	0.0106	0.0215	0.015	0.0175	0.0245	0.0231	0.0177	0.0147	0.0069	0.00603021	0.00636885	0.00632008	0.00674847	None	0	1	FALSE	FALSE	mMesoderm-DS18198	None
chr1	14152318	14153225	74056	IM	M	0.02	0.0205	0.0159	None	0.0233	Other	0.97561	1.46541	Lactb2	0.024	0.0168	0.0161	0.0169	0.016	0.0129	0.0206	0.0212	0.0167	0.0248	0.023	0.0198	0.00603021	0.00636885	0.00632008	0.00674847	None	0	1	FALSE	FALSE	mForelimbBuds-DS18275	None
chr1	14153703	14154373	74057	M	None	0.0218	0.0168	0.0139	None	0.0184	Other	1.29762	1.32374	Lactb2	0.0159	0.0219	0.0133	0.0141	0.0173	0.0106	0.0209	0.0244	0.0214	0.0179	0.0149	0.0235	0.00603021	0.00636885	0.00632008	0.00674847	None	0	0	FALSE	FALSE		None
chr1	14155100	14155464	74058	None	M	0.0176	0.0163	0.0149	None	0.0239	Other	1.07975	1.60403	Lactb2	0.0181	0.0149	0.0133	0.0153	0.0148	0.0141	0.0196	0.0152	0.014	0.0315	0.0158	0.0136	0.00603021	0.00636885	0.00632008	0.00674847	None	0	1	FALSE	FALSE	ZhBTc4-DS17616	None
chr1	14155743	14156012	74059	None	M	0.0193	0.0176	0.0156	None	0.0252	Other	1.09659	1.61538	Lactb2	0.0163	0.0185	0.0197	0.0152	0.0098	0.0214	0.021	0.0177	0.016	0.0282	0.024	0.0191	0.00603021	0.00636885	0.00632008	0.00674847	None	0	0	FALSE	FALSE		None
chr1	14156441	14156838	74060	None	M	0.0175	0.0166	0.0145	None	0.0246	Other	1.05422	1.69655	Lactb2	0.0168	0.0163	0.0166	0.0145	0.0153	0.0135	0.0174	0.0186	0.0165	0.022	0.0292	0.0265	0.00603021	0.00636885	0.00632008	0.00674847	None	0	1	FALSE	FALSE	mMesoderm-DS18198	None
chr1	14157376	14158053	74061	M	None	0.0205	0.0119	0.0125	None	0.018	Other	1.72269	1.44	Lactb2	0.011	0.0099	0.0165	0.0114	0.0091	0.0182	0.0203	0.021	0.0201	0.015	0.0223	0.0207	0.00603021	0.00636885	0.00632008	0.00674847	None	0	0	FALSE	FALSE		None
chr1	14167424	14168186	74062	M	None	0.0234	0.0167	0.0149	None	0.0194	Other	1.4012	1.30201	Eya1	0.0183	0.0163	0.0133	0.0147	0.0153	0.0151	0.0219	0.0259	0.0255	0.0185	0.0178	0.0233	0.00603021	0.00636885	0.00632008	0.00674847	None	0	1	FALSE	FALSE	mESC_FIKO-DS17063	None
chr1	14168796	14169695	74063	M	M	0.0236	0.0171	0.0127	None	0.0241	Other	1.38012	1.89764	Eya1	0.0157	0.0185	0.0192	0.0143	0.0109	0.0097	0.0235	0.0228	0.0246	0.0223	0.0265	0.0262	0.00603021	0.00636885	0.00632008	0.00674847	None	0	0	FALSE	FALSE		None
chr1	14171624	14172189	74064	IM	None	0.0213	0.0193	0.0142	None	0.0187	Other	1.10363	1.3169	Eya1	0.0206	0.0172	0.0185	0.0131	0.0137	0.018	0.0221	0.0245	0.0147	0.0205	0.0173	0.0157	0.00603021	0.00636885	0.00632008	0.00674847	None	0	3	FALSE	FALSE	mMesoderm-DS18198 mLung-DS14479 CH12-DS22542	None
chr1	14187871	14188546	74065	IM	IM	0.0228	0.0162	0.0195	None	0.0224	Other	1.40741	1.14872	Eya1	0.015	0.0193	0.0155	0.0197	0.0198	0.0185	0.019	0.0293	0.0274	0.0214	0.0238	0.0235	0.00603021	0.00636885	0.00632008	0.00674847	None	0	1	FALSE	FALSE	mESC_FIKO-DS17063	None
chr1	14188739	14189321	74066	M	None	0.0212	0.0161	0.0149	None	0.0204	Other	1.31677	1.36913	Eya1	0.0172	0.014	0.0157	0.0155	0.0103	0.0171	0.0192	0.0248	0.0232	0.0198	0.0201	0.022	0.00603021	0.00636885	0.00632008	0.00674847	None	0	1	FALSE	FALSE	mfBrain-DS14536	None
chr1	14210942	14211593	74067	M	None	0.0224	0.014	0.0165	None	0.0175	Other	1.6	1.06061	Eya1	0.0133	0.0147	0.0149	0.0168	0.0176	0.0146	0.0197	0.0247	0.0281	0.0164	0.0154	0.0223	0.00603021	0.00636885	0.00632008	0.00674847	None	0	0	FALSE	FALSE		None
chr1	14211604	14212234	74068	IM	M	0.0208	0.0176	0.0168	None	0.0204	Other	1.18182	1.21429	Eya1	0.0182	0.0193	0.014	0.0166	0.0228	0.0124	0.0224	0.0171	0.0205	0.0201	0.0205	0.0213	0.00603021	0.00636885	0.00632008	0.00674847	None	0	0	FALSE	FALSE		None
chr1	14214425	14214867	74069	M	None	0.0204	0.0134	0.0111	None	0.0152	Other	1.52239	1.36937	Eya1	0.0153	0.0105	0.012	0.0112	0.0098	0.0118	0.0226	0.0151	0.0199	0.0141	0.0159	0.0173	0.00603021	0.00636885	0.00632008	0.00674847	None	0	0	FALSE	FALSE		None
chr1	14215427	14215711	74070	M	None	0.0195	0.0123	0.0155	None	0.0157	Other	1.58537	1.0129	Eya1	0.0109	0.0136	0.0145	0.0161	0.0125	0.0162	0.0181	0.0228	0.0203	0.0176	0.0115	0.0154	0.00603021	0.00636885	0.00632008	0.00674847	None	0	1	FALSE	FALSE	mPATSKI-DS15697	None
chr1	14228472	14228993	74071	I	None	0.017	0.0198	0.0128	None	0.0189	Other	0.858586	1.47656	Eya1	0.0208	0.0193	0.0176	0.014	0.0134	0.0086	0.0149	0.0182	0.0221	0.0209	0.0145	0.0186	0.00603021	0.00636885	0.00632008	0.00674847	None	0	0	FALSE	FALSE		None
chr1	14229156	14229773	74072	None	M	0.0151	0.0163	0.0123	None	0.0192	Other	0.92638	1.56098	Eya1	0.0161	0.0126	0.0212	0.0127	0.0134	0.0104	0.0127	0.0197	0.0173	0.0225	0.0153	0.0153	0.00603021	0.00636885	0.00632008	0.00674847	None	0	0	FALSE	FALSE		None
chr1	14233077	14233648	74073	M	None	0.0207	0.0167	0.0153	None	0.0184	Other	1.23952	1.20261	Eya1	0.0155	0.0185	0.0175	0.0143	0.0195	0.0149	0.0178	0.0217	0.0287	0.0232	0.0121	0.0131	0.00603021	0.00636885	0.00632008	0.00674847	None	0	0	FALSE	FALSE		None
chr1	14262485	14263114	74075	M	None	0.026	0.0134	0.0132	None	0.0122	Other	1.9403	0.924242	Eya1	0.0146	0.0107	0.0135	0.0122	0.0154	0.0142	0.0186	0.008	0.0709	0.0126	0.0136	0.0095	0.00603021	0.00636885	0.00632008	0.00674847	None	0	0	FALSE	FALSE		None
chr1	14268731	14270018	74076	M	M	0.0196	0.0157	0.0133	None	0.0216	Other	1.24841	1.62406	Eya1	0.0164	0.0133	0.0169	0.0129	0.0117	0.0158	0.0182	0.0197	0.0241	0.0227	0.0205	0.02	0.00603021	0.00636885	0.00632008	0.00674847	None	0	0	FALSE	FALSE		None
chr1	14271910	14272360	74077	M	None	0.02	0.0109	0.0139	None	0.0128	Other	1.83486	0.920863	Eya1	0.0104	0.0099	0.0137	0.0126	0.0152	0.0164	0.0171	0.0202	0.0291	0.0115	0.0109	0.0179	0.00603021	0.00636885	0.00632008	0.00674847	None	0	0	FALSE	FALSE		None
chr1	14299353	14300791	74078	IM	None	0.018	0.0249	0.0135	None	0.0135	AllTSS2	0.722892	1	Eya1	0.0297	0.0178	0.0208	0.0137	0.012	0.0144	0.0189	0.0164	0.0171	0.0115	0.0188	0.0129	0.00603021	0.00636885	0.00632008	0.00674847	Canyon	4346	4	FALSE	FALSE	mPATSKI-DS15697 mPATSKI-DS15697 m3134-DS8497 mPATSKI-DS15697 mfBrain-DS14536 mHindlimbsBuds-DS18279	None
chr1	14303848	14304307	74079	M	None	0.0186	0.0117	0.0131	None	0.0106	Other	1.58974	0.80916	Msc	0.0091	0.0149	0.0145	0.0131	0.0132	0.0131	0.0179	0.0166	0.0233	0.0091	0.0132	0.0116	0.00603021	0.00636885	0.00632008	0.00674847	None	0	0	FALSE	FALSE		None
chr1	14318692	14319097	74081	None	I	0.0106	0.0089	0.0189	None	0.0173	Other	1.19101	0.915344	Msc	0.0077	0.0087	0.0123	0.0167	0.0183	0.0255	0.0108	0.0077	0.0134	0.018	0.0185	0.0143	0.00603021	0.00636885	0.00632008	0.00674847	None	0	0	FALSE	FALSE		None
chr1	14323915	14324323	74082	M	None	0.0182	0.0116	0.0124	None	0.0111	Other	1.56897	0.895161	Msc	0.0069	0.0213	0.012	0.0121	0.0104	0.0148	0.0151	0.022	0.0235	0.0099	0.0095	0.0157	0.00603021	0.00636885	0.00632008	0.00674847	None	0	0	FALSE	FALSE		None
chr1	14328855	14329284	74083	M	None	0.0186	0.0124	0.0107	None	0.011	Other	1.5	1.02804	Msc	0.0103	0.0151	0.0145	0.0108	0.0126	0.0087	0.0211	0.0133	0.0171	0.0117	0.0086	0.0119	0.00603021	0.00636885	0.00632008	0.00674847	None	0	0	FALSE	FALSE		None
chr1	14335104	14335695	74084	M	None	0.0186	0.0135	0.0099	None	0.0151	Other	1.37778	1.52525	Msc	0.0136	0.0192	0.0066	0.009	0.0104	0.0117	0.0188	0.0213	0.0148	0.0151	0.0178	0.0124	0.00603021	0.00636885	0.00632008	0.00674847	None	0	1	FALSE	FALSE	mHindlimbsBuds-DS18279	None
chr1	14409586	14410116	74088	M	None	0.0193	0.0161	0.0166	None	0.0166	Other	1.19876	1	Msc	0.0167	0.0177	0.0126	0.0158	0.0199	0.0161	0.0174	0.021	0.0231	0.0175	0.0145	0.0166	0.00603021	0.00636885	0.00632008	0.00674847	None	0	0	FALSE	FALSE		None
chr1	14428512	14428832	74089	None	I	0.0161	0.0124	0.0205	None	0.0163	Other	1.29839	0.795122	Msc	0.0151	0.0088	0.0099	0.0226	0.0133	0.0207	0.0154	0.0153	0.0189	0.0154	0.0175	0.0174	0.00603021	0.00636885	0.00632008	0.00674847	None	0	1	FALSE	FALSE	mPATSKI-DS15697	None
chr1	14449470	14450007	74094	M	None	0.0169	0.0132	0.0133	None	0.013	Other	1.2803	0.977444	Msc	0.011	0.0144	0.0175	0.0138	0.0181	0.0082	0.0151	0.0175	0.0218	0.0088	0.0228	0.013	0.00603021	0.00636885	0.00632008	0.00674847	None	0	1	FALSE	FALSE	mPATSKI-DS15697	None
chr1	14451788	14452399	74095	M	None	0.0177	0.0078	0.0111	None	0.0093	Other	2.26923	0.837838	Msc	0.0066	0.0105	0.0076	0.0109	0.0142	0.0092	0.0153	0.0113	0.0328	0.0092	0.0096	0.0094	0.00603021	0.00636885	0.00632008	0.00674847	None	0	0	FALSE	FALSE		None
chr1	14454601	14455828	74096	None	I	0.0083	0.0101	0.0307	None	0.0139	Other	0.821782	0.452769	Msc	0.0102	0.0087	0.0117	0.0361	0.0248	0.0206	0.0084	0.0072	0.0094	0.014	0.0124	0.0151	0.00603021	0.00636885	0.00632008	0.00674847	None	0	1	FALSE	FALSE	mPATSKI-DS15697 mPATSKI-DS15697	None
chr1	14456937	14457833	74097	M	None	0.0198	0.0143	0.0152	None	0.015	Other	1.38462	0.986842	Msc	0.0125	0.0199	0.0123	0.0166	0.0111	0.015	0.0199	0.0222	0.0167	0.0131	0.0136	0.0215	0.00603021	0.00636885	0.00632008	0.00674847	None	0	1	FALSE	FALSE	mPATSKI-DS15697	None
chr1	14464300	14466288	74099	IM	M	0.0183	0.0172	0.0138	None	0.0175	Other	1.06395	1.26812	Msc	0.0194	0.014	0.0154	0.0143	0.0121	0.0138	0.0168	0.0224	0.0181	0.0164	0.0226	0.0148	0.00603021	0.00636885	0.00632008	0.00674847	None	0	0	FALSE	FALSE		None
chr1	14473759	14475879	74100	IM	IM	0.0138	0.0216	0.0642	I	0.0257	Enhancer4	0.638889	0.400312	Msc	0.018	0.0268	0.0248	0.0654	0.0596	0.0647	0.0127	0.0148	0.0164	0.0196	0.0312	0.035	0.00603021	0.00636885	0.00632008	0.00674847	None	0	2	FALSE	FALSE	MEL-DS13036 m3134-DS8497 MEL-DS13036	None
chr1	14482476	14483091	74101	M	None	0.0176	0.0136	0.0118	None	0.0122	Other	1.29412	1.0339	Msc	0.0133	0.0136	0.0142	0.0104	0.0137	0.0142	0.0184	0.0177	0.0149	0.0117	0.0145	0.0109	0.00603021	0.00636885	0.00632008	0.00674847	None	0	1	FALSE	FALSE	mMesoderm-DS18198	None
chr1	14484857	14485486	74102	M	None	0.019	0.0138	0.0146	None	0.0179	Other	1.37681	1.22603	Msc	0.0148	0.0118	0.0137	0.0134	0.0152	0.0174	0.0181	0.0171	0.0239	0.0185	0.0161	0.0181	0.00603021	0.00636885	0.00632008	0.00674847	None	0	0	FALSE	FALSE		None
chr1	14485556	14486525	74103	IM	IM	0.0184	0.0199	0.0225	None	0.0201	Other	0.924623	0.893333	Msc	0.0173	0.0262	0.0192	0.0242	0.0187	0.021	0.0188	0.018	0.018	0.0191	0.0207	0.0219	0.00603021	0.00636885	0.00632008	0.00674847	None	0	2	FALSE	FALSE	MEL-DS13036 mMuscle_Skeletal-DS18130	None
chr1	14486548	14487149	74104	IM	M	0.0172	0.0173	0.018	None	0.0179	Enhancer4	0.99422	0.994444	Msc	0.0161	0.0173	0.0205	0.0177	0.016	0.0202	0.0157	0.0161	0.0236	0.0196	0.0145	0.0172	0.00603021	0.00636885	0.00632008	0.00674847	None	0	1	FALSE	FALSE	mESC_F4WT-DS17060	None
chr1	14487764	14488905	74105	IM	IM	0.0182	0.0206	0.0213	None	0.0169	Enhancer4	0.883495	0.793427	Msc	0.0233	0.0147	0.0204	0.0223	0.0181	0.0209	0.0175	0.0166	0.0222	0.0162	0.0183	0.0169	0.00603021	0.00636885	0.00632008	0.00674847	None	0	1	FALSE	FALSE	MEL-DS13036	None
chr1	14488941	14489666	74106	IM	I	0.0181	0.0171	0.0252	None	0.0151	Enhancer4	1.05848	0.599206	Msc	0.0138	0.0233	0.0181	0.0306	0.0172	0.0167	0.0181	0.0168	0.0199	0.0137	0.0153	0.0183	0.00603021	0.00636885	0.00632008	0.00674847	None	0	0	FALSE	FALSE		None
chr1	14493238	14493725	74107	M	None	0.0192	0.0181	0.0188	None	0.0141	Other	1.06077	0.75	Msc	0.0155	0.0247	0.017	0.018	0.0159	0.0235	0.0219	0.0169	0.0132	0.0132	0.0118	0.0186	0.00603021	0.00636885	0.00632008	0.00674847	None	0	2	FALSE	FALSE	mMesoderm-DS18198 mRetina-DS20000	None
chr1	14494202	14494932	74108	M	None	0.0202	0.0164	0.0181	None	0.0159	Enhancer4	1.23171	0.878453	Msc	0.0178	0.0133	0.0167	0.0201	0.0162	0.0139	0.0218	0.0186	0.017	0.014	0.021	0.015	0.00603021	0.00636885	0.00632008	0.00674847	Canyon	3753	3	FALSE	FALSE	mCD19-DS16168 mB-DS17866 mMesoderm-DS18198	None
chr1	14495013	14495411	74109	None	I	0.0141	0.0147	0.0249	None	0.0151	Enhancer4	0.959184	0.606426	Msc	0.0149	0.0109	0.0186	0.0266	0.0315	0.0143	0.0147	0.0124	0.0142	0.0132	0.0185	0.0163	0.00603021	0.00636885	0.00632008	0.00674847	Canyon	3753	3	FALSE	FALSE	mKidney-DS13948 mfBrain-DS14536 mCerebrum-DS14024	None
chr1	14496169	14497942	74110	IM	IM	0.0203	0.0251	0.0202	None	0.0195	Enhancer4	0.808765	0.965347	Msc	0.0313	0.0183	0.0174	0.0189	0.021	0.0232	0.0191	0.021	0.0236	0.0178	0.0237	0.0193	0.00603021	0.00636885	0.00632008	0.00674847	Canyon	3753	5	FALSE	FALSE	mRetina-DS20000 ZhBTc4-DS17562 mMesoderm-DS18198 mHindlimbsBuds-DS18279 mMesoderm-DS18198 mfLiver_F1-DS20991	None
chr1	14498141	14498499	74111	M	None	0.0182	0.0164	0.0138	None	0.0156	Enhancer4	1.10976	1.13043	Msc	0.0178	0.0152	0.0142	0.0169	0.0057	0.0117	0.0193	0.019	0.0135	0.0149	0.0137	0.0194	0.00603021	0.00636885	0.00632008	0.00674847	None	0	1	FALSE	FALSE	mMesoderm-DS18198	None
chr1	14501111	14501688	74112	M	None	0.02	0.0153	0.0173	None	0.0173	Other	1.30719	1	Msc	0.013	0.0208	0.0149	0.0198	0.0129	0.0139	0.0227	0.0139	0.0187	0.0142	0.0203	0.0218	0.00603021	0.00636885	0.00632008	0.00674847	None	0	0	FALSE	FALSE		None
chr1	14560595	14561301	74113	None	I	0.0081	0.0112	0.0273	None	0.0113	Other	0.723214	0.413919	Msc	0.0121	0.0103	0.0102	0.0259	0.0335	0.0259	0.0092	0.005	0.0085	0.0088	0.0158	0.0128	0.00603021	0.00636885	0.00632008	0.00674847	None	0	2	FALSE	FALSE	mMesoderm-DS18198 mNIH_3T3-DS16900	None
chr1	14580988	14581375	74116	None	M	0.013	0.0117	0.0189	None	0.0207	Other	1.11111	1.09524	Msc	0.0107	0.0128	0.0131	0.0171	0.0234	0.0203	0.0125	0.0132	0.0142	0.0232	0.0162	0.0192	0.00603021	0.00636885	0.00632008	0.00674847	None	0	0	FALSE	FALSE		None
chr1	14582543	14583296	74117	None	M	0.017	0.0156	0.0155	None	0.018	Other	1.08974	1.16129	Msc	0.0138	0.0167	0.0187	0.0146	0.0138	0.0192	0.0148	0.0201	0.0202	0.0189	0.0157	0.0185	0.00603021	0.00636885	0.00632008	0.00674847	None	0	0	FALSE	FALSE		None
chr1	14583711	14584299	74118	M	None	0.0192	0.0133	0.0138	None	0.0168	Other	1.44361	1.21739	Msc	0.0152	0.0115	0.0105	0.0146	0.0083	0.0163	0.0151	0.0251	0.0251	0.0169	0.0174	0.0157	0.00603021	0.00636885	0.00632008	0.00674847	None	0	0	FALSE	FALSE		None
chr1	14584402	14584874	74119	M	None	0.0175	0.013	0.0149	None	0.0141	Other	1.34615	0.946309	Msc	0.0167	0.0099	0.0071	0.0151	0.0166	0.0129	0.0149	0.0204	0.0223	0.0129	0.0184	0.0126	0.00603021	0.00636885	0.00632008	0.00674847	None	0	0	FALSE	FALSE		None
chr1	14585708	14586740	74120	IM	IM	0.0159	0.0143	0.0699	None	0.0263	Other	1.11189	0.376252	Msc	0.0153	0.0135	0.0128	0.0918	0.0318	0.0402	0.0156	0.0178	0.0144	0.0227	0.0284	0.0331	0.00603021	0.00636885	0.00632008	0.00674847	None	0	2	FALSE	FALSE	CH12-DS22542 MEL-DS13036	None
chr1	14600653	14601203	74121	M	None	0.0171	0.0094	0.0138	None	0.0133	Other	1.81915	0.963768	Msc	0.0111	0.008	0.0067	0.015	0.0105	0.0134	0.0181	0.0136	0.0181	0.0134	0.0096	0.0171	0.00603021	0.00636885	0.00632008	0.00674847	None	0	0	FALSE	FALSE		None
chr1	14601265	14601883	74122	M	None	0.0184	0.012	0.0143	None	0.0152	Other	1.53333	1.06294	Msc	0.0091	0.0176	0.0126	0.0144	0.0137	0.0146	0.0163	0.0169	0.0267	0.0144	0.0139	0.0185	0.00603021	0.00636885	0.00632008	0.00674847	None	0	0	FALSE	FALSE		None
chr1	14605348	14605714	74124	M	None	0.019	0.0128	0.0183	None	0.017	Other	1.48438	0.928962	Msc	0.0099	0.0208	0.0108	0.019	0.0186	0.0164	0.0177	0.0177	0.0244	0.0178	0.0145	0.0177	0.00603021	0.00636885	0.00632008	0.00674847	None	0	0	FALSE	FALSE		None
chr1	14626082	14626465	74127	M	None	0.0185	0.0117	0.0172	None	0.0122	Other	1.5812	0.709302	Msc	0.011	0.0136	0.0113	0.0168	0.0195	0.0162	0.021	0.0111	0.0196	0.0119	0.0104	0.0146	0.00603021	0.00636885	0.00632008	0.00674847	None	0	2	FALSE	FALSE	mHindlimbsBuds-DS18279 mESC_FIKO-DS17063	None
chr1	14626886	14627180	74128	M	None	0.0178	0.0147	0.0126	None	0.0138	Other	1.21088	1.09524	Msc	0.0149	0.0152	0.0137	0.0113	0.0211	0.0092	0.0183	0.0119	0.0232	0.0158	0.0102	0.0124	0.00603021	0.00636885	0.00632008	0.00674847	None	0	0	FALSE	FALSE		None
chr1	14636762	14637714	74129	M	None	0.0187	0.0136	0.011	None	0.0166	Other	1.375	1.50909	Msc	0.012	0.0152	0.0159	0.0105	0.0129	0.0109	0.0183	0.0184	0.0204	0.0151	0.0186	0.0181	0.00603021	0.00636885	0.00632008	0.00674847	None	0	0	FALSE	FALSE		None
chr1	14647683	14648120	74130	M	None	0.0206	0.0148	0.014	None	0.0194	Other	1.39189	1.38571	Msc	0.0147	0.017	0.0124	0.0122	0.0185	0.0152	0.0235	0.0177	0.0148	0.02	0.014	0.0237	0.00603021	0.00636885	0.00632008	0.00674847	None	0	0	FALSE	FALSE		None
chr1	14700987	14701333	74131	M	None	0.0189	0.0134	0.0121	None	0.0167	Other	1.41045	1.38017	Msc	0.0136	0.0104	0.0166	0.0128	0.011	0.011	0.0202	0.0187	0.0151	0.0154	0.0203	0.0162	0.00603021	0.00636885	0.00632008	0.00674847	None	0	0	FALSE	FALSE		None
chr1	14703789	14704507	74133	M	None	0.0204	0.0168	0.0145	None	0.0172	Other	1.21429	1.18621	Msc	0.0168	0.0163	0.0175	0.0164	0.0125	0.0106	0.0191	0.0224	0.0219	0.0171	0.0151	0.0198	0.00603021	0.00636885	0.00632008	0.00674847	None	0	0	FALSE	FALSE		None
chr1	14717184	14717997	74134	M	M	0.0184	0.0144	0.0126	None	0.0228	Other	1.27778	1.80952	Msc	0.0158	0.0119	0.0139	0.0124	0.0132	0.0128	0.0195	0.0184	0.0153	0.0252	0.0199	0.0198	0.00603021	0.00636885	0.00632008	0.00674847	None	0	0	FALSE	FALSE		None
chr1	14719104	14719525	74135	None	I	0.0127	0.0141	0.0176	None	0.0103	Other	0.900709	0.585227	Msc	0.0148	0.0142	0.0125	0.0185	0.0169	0.0156	0.0147	0.0098	0.0098	0.0079	0.0092	0.0176	0.00603021	0.00636885	0.00632008	0.00674847	None	0	1	FALSE	FALSE	mPATSKI-DS15697	None
chr1	14729653	14730670	74136	I	IM	0.0136	0.0176	0.0208	None	0.0219	Other	0.772727	1.05288	Msc	0.0193	0.015	0.0162	0.0193	0.0196	0.026	0.0133	0.0135	0.015	0.0264	0.0155	0.0174	0.00603021	0.00636885	0.00632008	0.00674847	None	0	2	FALSE	FALSE	mESC_F4WT-DS17060 CH12-DS22542	None
chr1	14736877	14737154	74137	M	None	0.0188	0.013	0.0138	None	0.0157	Other	1.44615	1.13768	Msc	0.0118	0.0195	0.0085	0.0144	0.0091	0.0159	0.0201	0.0142	0.0202	0.0148	0.0151	0.0188	0.00603021	0.00636885	0.00632008	0.00674847	None	0	0	FALSE	FALSE		None
chr1	14740481	14740932	74140	M	None	0.0186	0.0162	0.013	None	0.0155	Other	1.14815	1.19231	Msc	0.016	0.0192	0.0132	0.0152	0.0092	0.0104	0.0188	0.0229	0.013	0.0123	0.016	0.0228	0.00603021	0.00636885	0.00632008	0.00674847	None	0	0	FALSE	FALSE		None
chr1	14741476	14742428	74141	IM	M	0.0193	0.0176	0.0155	None	0.0172	Other	1.09659	1.10968	Msc	0.0162	0.0199	0.0182	0.0145	0.0153	0.0183	0.0193	0.0187	0.0201	0.0174	0.0175	0.0163	0.00603021	0.00636885	0.00632008	0.00674847	None	0	1	FALSE	FALSE	ZhBTc4-DS15236	None
chr1	14743220	14747662	74142	IM	M	0.0267	0.0259	0.013	None	0.0231	AllTSS2	1.03089	1.77692	Msc	0.0311	0.0212	0.0185	0.0136	0.0121	0.0122	0.0287	0.0249	0.0223	0.0216	0.0246	0.0253	0.00603021	0.00636885	0.00632008	0.00674847	cUMR	3143	7	FALSE	FALSE	ZhBTc4-DS15236 ZhBTc4-DS17562 mMuscle_Skeletal-DS18130 mMuscle_Skeletal-DS18130 mPATSKI-DS15697 mfLiver_F1-DS20991 ZhBTc4-DS17562 mESC_FIKO-DS17063 ZhBTc4-DS17562 mPATSKI-DS15697 mHeart-DS17909 mESC_FIKO-DS17063 ZhBTc4-DS15236	None
chr1	14752218	14752698	74144	I	None	0.0167	0.0178	0.0147	None	0.0183	Other	0.938202	1.2449	Msc	0.0164	0.0211	0.0176	0.0127	0.015	0.02	0.0147	0.0189	0.0204	0.0179	0.0169	0.0208	0.00603021	0.00636885	0.00632008	0.00674847	None	0	0	FALSE	FALSE		None
chr1	14779210	14779693	74146	M	None	0.0215	0.0137	0.014	None	0.0159	Other	1.56934	1.13571	Msc	0.0125	0.0142	0.0164	0.0135	0.0141	0.0155	0.0218	0.0227	0.0191	0.0146	0.0145	0.0208	0.00603021	0.00636885	0.00632008	0.00674847	None	0	0	FALSE	FALSE		None
chr1	14785792	14786215	74148	M	None	0.0195	0.0164	0.0132	None	0.015	Other	1.18902	1.13636	Msc	0.0188	0.0127	0.0149	0.013	0.0163	0.0114	0.0217	0.0206	0.0111	0.0103	0.0165	0.0249	0.00603021	0.00636885	0.00632008	0.00674847	None	0	0	FALSE	FALSE		None
chr1	14809248	14809655	74149	M	None	0.0198	0.0121	0.0097	None	0.0131	Other	1.63636	1.35052	Msc	0.0097	0.0168	0.0128	0.0087	0.0112	0.0115	0.0235	0.0146	0.0141	0.0159	0.0117	0.0077	0.00603021	0.00636885	0.00632008	0.00674847	None	0	1	FALSE	FALSE	mMuscle_Skeletal-DS18130	None
chr1	14810387	14811114	74150	M	None	0.02	0.0093	0.0128	None	0.0159	Other	2.15054	1.24219	Msc	0.0079	0.0116	0.0101	0.0147	0.0077	0.0118	0.0197	0.0238	0.0165	0.0163	0.0124	0.0185	0.00603021	0.00636885	0.00632008	0.00674847	None	0	0	FALSE	FALSE		None
chr1	14851333	14851607	74152	M	None	0.019	0.0146	0.0128	None	0.0175	Other	1.30137	1.36719	Msc	0.0135	0.0163	0.0154	0.0112	0.0152	0.0151	0.0181	0.0127	0.0296	0.0184	0.011	0.0221	0.00603021	0.00636885	0.00632008	0.00674847	None	0	0	FALSE	FALSE		None
chr1	14851997	14853113	74153	None	IM	0.0146	0.0143	0.0187	None	0.0174	Other	1.02098	0.930481	Msc	0.0134	0.0157	0.0147	0.0185	0.02	0.0179	0.0153	0.0131	0.0143	0.0158	0.0187	0.0198	0.00603021	0.00636885	0.00632008	0.00674847	None	0	2	FALSE	FALSE	CH12-DS22542 ZhBTc4-DS15236	None
chr1	14907732	14909558	74155	IM	M	0.0211	0.0189	0.0132	None	0.0188	AllTSS2	1.1164	1.42424	Trpa1	0.0223	0.0168	0.0129	0.0131	0.0104	0.0156	0.0201	0.0253	0.0192	0.0178	0.0177	0.0223	0.00603021	0.00636885	0.00632008	0.00674847	cUMR	1135	3	FALSE	FALSE	mCD1-DS17129 mCJ7-DS13320 ZhBTc4-DS17616 mCJ7-DS13320	None
chr1	14909873	14910641	74156	M	I	0.0197	0.0156	0.0149	None	0.0166	Other	1.26282	1.11409	Msc	0.0148	0.0163	0.0169	0.0141	0.0149	0.017	0.0152	0.0231	0.0298	0.015	0.0191	0.0181	0.00603021	0.00636885	0.00632008	0.00674847	None	0	3	FALSE	FALSE	mESC_F4WT-DS17060 E14-DS21450 mMesoderm-DS18198	None
chr1	14967213	14967902	74161	M	None	0.0137	0.0129	0.0058	None	0.0101	Other	1.06202	1.74138	Msc	0.014	0.0086	0.0153	0.0068	0.0036	0.0048	0.0141	0.0134	0.0126	0.009	0.011	0.0119	0.00603021	0.00636885	0.00632008	0.00674847	None	0	0	FALSE	FALSE		None
chr1	14968517	14969790	74162	M	None	0.0193	0.0135	0.0102	None	0.0145	Other	1.42963	1.42157	Msc	0.0138	0.0141	0.0122	0.0103	0.0109	0.0095	0.0183	0.0227	0.0183	0.0132	0.0143	0.0178	0.00603021	0.00636885	0.00632008	0.00674847	None	0	1	FALSE	FALSE	CH12-DS22542	None
chr1	14969919	14973942	74163	M	IM	0.0202	0.0158	0.0122	None	0.0183	Other	1.27848	1.5	Msc	0.0155	0.0158	0.0164	0.0115	0.013	0.0133	0.0204	0.0185	0.0215	0.017	0.0189	0.0211	0.00603021	0.00636885	0.00632008	0.00674847	None	0	1	FALSE	FALSE	CH12-DS22542	None
chr1	14997608	14998194	74166	None	I	0.0084	0.0111	0.0184	None	0.0099	Other	0.756757	0.538043	Msc	0.0079	0.0163	0.0128	0.0194	0.017	0.0169	0.0066	0.0093	0.0129	0.0081	0.0105	0.0136	0.00603021	0.00636885	0.00632008	0.00674847	None	0	1	FALSE	FALSE	mPATSKI-DS15697	None
chr1	15005212	15005680	74167	M	None	0.0182	0.0118	0.0119	None	0.0148	Other	1.54237	1.2437	Msc	0.0116	0.0133	0.0106	0.011	0.0107	0.0154	0.0219	0.013	0.0129	0.0157	0.0119	0.0159	0.00603021	0.00636885	0.00632008	0.00674847	None	0	0	FALSE	FALSE		None
chr1	15007465	15009014	74168	None	M	0.0167	0.0153	0.0096	None	0.0193	Other	1.0915	2.01042	Msc	0.0185	0.0126	0.0106	0.0109	0.0092	0.0063	0.0159	0.0188	0.0164	0.0212	0.0211	0.0129	0.00603021	0.00636885	0.00632008	0.00674847	None	0	2	FALSE	FALSE	mCJ7-DS13320 CH12-DS22542	None
chr1	15052050	15052348	74169	M	None	0.019	0.0131	0.0101	None	0.0156	Other	1.45038	1.54455	Msc	0.014	0.0139	0.0098	0.0091	0.0133	0.0102	0.0215	0.0104	0.0209	0.0149	0.018	0.0149	0.00603021	0.00636885	0.00632008	0.00674847	None	0	0	FALSE	FALSE		None
chr1	15118624	15119216	74171	M	None	0.0182	0.011	0.0084	None	0.0128	Other	1.65455	1.52381	Msc	0.0085	0.0169	0.0105	0.008	0.0097	0.0086	0.0207	0.0162	0.0124	0.0148	0.0102	0.0108	0.00603021	0.00636885	0.00632008	0.00674847	None	0	0	FALSE	FALSE		None
chr1	15121326	15121758	74172	M	None	0.0169	0.0104	0.0122	None	0.0122	Other	1.625	1	Msc	0.0094	0.0103	0.013	0.0123	0.0129	0.0115	0.019	0.0179	0.0091	0.012	0.0082	0.0166	0.00603021	0.00636885	0.00632008	0.00674847	None	0	0	FALSE	FALSE		None
chr1	15122914	15123400	74173	M	None	0.0189	0.0107	0.0116	None	0.0136	Other	1.76636	1.17241	Msc	0.0097	0.0148	0.0084	0.013	0.0061	0.0124	0.0202	0.0167	0.0177	0.0135	0.0141	0.0133	0.00603021	0.00636885	0.00632008	0.00674847	None	0	0	FALSE	FALSE		None
chr1	15126190	15126869	74174	IM	None	0.0165	0.0172	0.0121	None	0.0156	Other	0.959302	1.28926	Msc	0.0193	0.0141	0.0155	0.0128	0.0111	0.0112	0.0178	0.0129	0.0166	0.0136	0.0197	0.0162	0.00603021	0.00636885	0.00632008	0.00674847	None	0	1	FALSE	FALSE	ZhBTc4-DS17562	None
chr1	15127616	15127887	74175	M	None	0.0174	0.0115	0.0101	None	0.0148	Other	1.51304	1.46535	Msc	0.0137	0.0084	0.0098	0.0093	0.0149	0.008	0.0164	0.0192	0.0184	0.0159	0.0154	0.0117	0.00603021	0.00636885	0.00632008	0.00674847	None	0	0	FALSE	FALSE		None
chr1	15137291	15138036	74177	None	M	0.0173	0.013	0.011	None	0.0194	Other	1.33077	1.76364	Msc	0.0148	0.0127	0.0089	0.0113	0.011	0.0103	0.0178	0.0153	0.0182	0.0203	0.0151	0.0215	0.00603021	0.00636885	0.00632008	0.00674847	None	0	0	FALSE	FALSE		None
chr1	15139986	15140335	74180	M	None	0.019	0.0123	0.015	None	0.0138	Other	1.54472	0.92	Msc	0.0128	0.0097	0.0141	0.0156	0.0166	0.0118	0.0164	0.0211	0.0247	0.0122	0.0172	0.0144	0.00603021	0.00636885	0.00632008	0.00674847	None	0	0	FALSE	FALSE		None
chr1	15177088	15177589	74182	M	None	0.0209	0.0127	0.0153	None	0.0159	Other	1.64567	1.03922	Msc	0.0131	0.0095	0.0156	0.0163	0.0124	0.0148	0.0244	0.0164	0.0154	0.0161	0.0097	0.0222	0.00603021	0.00636885	0.00632008	0.00674847	None	0	0	FALSE	FALSE		None
chr1	15192752	15193819	74183	M	M	0.018	0.0155	0.0134	None	0.0233	Other	1.16129	1.73881	Msc	0.0183	0.0126	0.0118	0.0128	0.0108	0.0173	0.0157	0.019	0.0243	0.0238	0.0229	0.0223	0.00603021	0.00636885	0.00632008	0.00674847	None	0	0	FALSE	FALSE		None
chr1	15193824	15194454	74184	M	None	0.019	0.0133	0.011	None	0.0189	Other	1.42857	1.71818	Msc	0.0132	0.0126	0.0146	0.0108	0.0104	0.0122	0.0168	0.0217	0.0226	0.0197	0.0204	0.0155	0.00603021	0.00636885	0.00632008	0.00674847	None	0	0	FALSE	FALSE		None
chr1	15194568	15195410	74185	M	M	0.021	0.0153	0.011	None	0.0204	Other	1.37255	1.85455	Msc	0.0176	0.0102	0.0155	0.0127	0.0118	0.0055	0.0205	0.0225	0.021	0.0241	0.0164	0.0154	0.00603021	0.00636885	0.00632008	0.00674847	None	0	0	FALSE	FALSE		None
chr1	15208542	15208846	74186	M	None	0.0194	0.0103	0.0119	None	0.0133	Other	1.8835	1.11765	Msc	0.0098	0.0089	0.013	0.0102	0.0137	0.0154	0.0213	0.0138	0.0201	0.011	0.0162	0.0162	0.00603021	0.00636885	0.00632008	0.00674847	None	0	0	FALSE	FALSE		None
chr1	15256610	15257011	74187	M	M	0.0194	0.0159	0.0155	None	0.0215	Other	1.22013	1.3871	Msc	0.0167	0.0124	0.018	0.0183	0.012	0.0108	0.0179	0.0192	0.0242	0.0227	0.019	0.0208	0.00603021	0.00636885	0.00632008	0.00674847	None	0	1	FALSE	FALSE	mESC_FIKO-DS17063	None
chr1	15273494	15274035	74188	M	None	0.0191	0.0179	0.0123	None	0.0154	Other	1.06704	1.25203	Terf1	0.0141	0.0251	0.019	0.0124	0.0101	0.0139	0.0198	0.0202	0.0157	0.0144	0.0199	0.0134	0.00603021	0.00636885	0.00632008	0.00674847	None	0	0	FALSE	FALSE		None
chr1	15274165	15275580	74189	IM	M	0.0236	0.0183	0.0099	None	0.0189	Other	1.28962	1.90909	Terf1	0.0177	0.0197	0.0182	0.0106	0.0097	0.0083	0.0267	0.0175	0.0213	0.0181	0.0177	0.022	0.00603021	0.00636885	0.00632008	0.00674847	None	0	0	FALSE	FALSE		None
chr1	15276016	15279109	74190	IM	M	0.0271	0.0233	0.0096	None	0.0199	Other	1.16309	2.07292	Terf1	0.0284	0.0199	0.0145	0.0102	0.0093	0.0083	0.0305	0.0199	0.0246	0.0186	0.0234	0.0192	0.00603021	0.00636885	0.00632008	0.00674847	cUMR	1375	8	FALSE	FALSE	ZhBTc4-DS15236 mCD1-DS17129 E14-DS21450 mRetina-DS20000 mMesoderm-DS18198 mfBrain-DS14536 mCerebellum-DS14034 mCerebellum-DS14034 mBrain-DS12727	None
chr1	15301563	15303989	74193	M	M	0.0185	0.0143	0.0132	None	0.0178	AllTSS2	1.29371	1.34848	Kcnb2	0.0135	0.0147	0.0159	0.0135	0.0133	0.0126	0.0184	0.0175	0.02	0.0184	0.0151	0.0194	0.00603021	0.00636885	0.00632008	0.00674847	None	0	0	FALSE	FALSE		None
chr1	15311253	15311610	74194	M	None	0.0169	0.008	0.0129	None	0.0153	Other	2.1125	1.18605	Kcnb2	0.0081	0.0057	0.0104	0.0145	0.0086	0.0118	0.0176	0.0177	0.0137	0.0165	0.0102	0.0177	0.00603021	0.00636885	0.00632008	0.00674847	None	0	1	FALSE	FALSE	CH12-DS22542	None
chr1	15313189	15313942	74195	M	None	0.0185	0.012	0.0112	None	0.0124	Other	1.54167	1.10714	Kcnb2	0.0113	0.0155	0.0099	0.0115	0.0129	0.0088	0.0198	0.0138	0.0199	0.01	0.0117	0.0193	0.00603021	0.00636885	0.00632008	0.00674847	None	0	0	FALSE	FALSE		None
chr1	15314320	15314614	74196	M	None	0.0189	0.0152	0.0156	None	0.0209	Other	1.24342	1.33974	Kcnb2	0.0137	0.0155	0.0188	0.0149	0.0175	0.0157	0.0191	0.0195	0.0176	0.0216	0.0205	0.0194	0.00603021	0.00636885	0.00632008	0.00674847	None	0	0	FALSE	FALSE		None
chr1	15314815	15315735	74197	M	None	0.0231	0.011	0.013	None	0.017	Other	2.1	1.30769	Kcnb2	0.0109	0.0114	0.011	0.0136	0.0117	0.0122	0.0229	0.022	0.0252	0.0181	0.0138	0.0177	0.00603021	0.00636885	0.00632008	0.00674847	None	0	1	FALSE	FALSE	mMesoderm-DS18198	None
chr1	15315795	15316523	74198	M	IM	0.0215	0.0167	0.0151	None	0.0172	Other	1.28743	1.13907	Kcnb2	0.0164	0.0183	0.0153	0.0162	0.0182	0.0093	0.0208	0.0199	0.0255	0.0195	0.0176	0.011	0.00603021	0.00636885	0.00632008	0.00674847	None	0	0	FALSE	FALSE		None
chr1	15316832	15317084	74199	M	None	0.0182	0.0106	0.0141	None	0.0165	Other	1.71698	1.17021	Kcnb2	0.0077	0.019	0.0078	0.015	0.0161	0.0101	0.0161	0.0157	0.0281	0.0168	0.0165	0.0157	0.00603021	0.00636885	0.00632008	0.00674847	None	0	0	FALSE	FALSE		None
chr1	15317372	15317781	74200	M	None	0.0173	0.0161	0.0143	None	0.0158	Other	1.07453	1.1049	Kcnb2	0.0137	0.02	0.0178	0.0156	0.0093	0.0148	0.0163	0.0165	0.0213	0.015	0.0123	0.0215	0.00603021	0.00636885	0.00632008	0.00674847	None	0	2	FALSE	FALSE	mfLiver_F1-DS20991 CH12-DS22542	None
chr1	15318178	15318646	74201	M	None	0.0191	0.0128	0.0148	None	0.0143	Other	1.49219	0.966216	Kcnb2	0.0099	0.0178	0.0144	0.0165	0.0128	0.0119	0.0195	0.0185	0.0187	0.0128	0.0147	0.0177	0.00603021	0.00636885	0.00632008	0.00674847	None	0	1	FALSE	FALSE	mCerebrum-DS14024	None
chr1	15319010	15320196	74202	M	M	0.0234	0.0141	0.0093	None	0.0169	Other	1.65957	1.8172	Kcnb2	0.0162	0.0106	0.0131	0.0108	0.0043	0.0095	0.0227	0.0203	0.0295	0.0182	0.0171	0.0135	0.00603021	0.00636885	0.00632008	0.00674847	None	0	0	FALSE	FALSE		None
chr1	15352667	15353199	74203	M	M	0.0166	0.0118	0.0096	None	0.0164	Other	1.40678	1.70833	Kcnb2	0.012	0.0129	0.0099	0.0092	0.0103	0.0102	0.0205	0.0099	0.0123	0.0179	0.0126	0.0167	0.00603021	0.00636885	0.00632008	0.00674847	None	0	0	FALSE	FALSE		None
chr1	15356093	15356367	74204	None	M	0.0165	0.0136	0.0133	None	0.0229	Other	1.21324	1.7218	Kcnb2	0.0145	0.0123	0.0127	0.012	0.015	0.0156	0.0151	0.0208	0.0155	0.0271	0.0183	0.0174	0.00603021	0.00636885	0.00632008	0.00674847	None	0	0	FALSE	FALSE		None
chr1	15425676	15426424	74206	M	None	0.0204	0.0128	0.011	None	0.0167	Other	1.59375	1.51818	Kcnb2	0.0109	0.0169	0.0125	0.0099	0.0103	0.0147	0.0208	0.0199	0.0201	0.0186	0.0158	0.013	0.00603021	0.00636885	0.00632008	0.00674847	None	0	0	FALSE	FALSE		None
chr1	15445356	15445827	74212	M	None	0.0196	0.0118	0.0132	None	0.0176	Other	1.66102	1.33333	Kcnb2	0.0097	0.0139	0.0145	0.0136	0.0122	0.0128	0.0203	0.0135	0.025	0.0164	0.0167	0.0215	0.00603021	0.00636885	0.00632008	0.00674847	None	0	0	FALSE	FALSE		None
chr1	15472431	15472916	74214	M	None	0.0187	0.0118	0.0106	None	0.0119	Other	1.58475	1.12264	Kcnb2	0.0097	0.013	0.0154	0.0104	0.0114	0.0106	0.0184	0.0156	0.0232	0.0121	0.0122	0.0111	0.00603021	0.00636885	0.00632008	0.00674847	None	0	1	FALSE	FALSE	mBrain-DS12727	None
chr1	15473229	15473855	74215	M	None	0.0191	0.0159	0.0104	None	0.0158	Other	1.20126	1.51923	Kcnb2	0.0159	0.0152	0.0167	0.0103	0.01	0.0111	0.0196	0.0189	0.0178	0.0161	0.0127	0.0181	0.00603021	0.00636885	0.00632008	0.00674847	None	0	2	FALSE	FALSE	mfBrain-DS14536 mCerebrum-DS14024	None
chr1	15473884	15474251	74216	M	None	0.0185	0.0113	0.0112	None	0.0149	Other	1.63717	1.33036	Kcnb2	0.0123	0.0133	0.0064	0.0125	0.0099	0.0087	0.0164	0.0211	0.0217	0.014	0.0161	0.0158	0.00603021	0.00636885	0.00632008	0.00674847	None	0	1	FALSE	FALSE	mCerebrum-DS14024	None
chr1	15488009	15488860	74218	M	None	0.0208	0.0118	0.0086	None	0.0113	Other	1.76271	1.31395	Kcnb2	0.0114	0.0151	0.0092	0.0076	0.0111	0.0096	0.0236	0.0214	0.0114	0.0068	0.017	0.0167	0.00603021	0.00636885	0.00632008	0.00674847	None	0	0	FALSE	FALSE		None
chr1	15522937	15523301	74219	None	M	0.0184	0.0123	0.0161	None	0.0218	Other	1.49593	1.35404	Kcnb2	0.0113	0.0104	0.0171	0.016	0.0171	0.0156	0.0208	0.0104	0.0203	0.0195	0.026	0.0232	0.00603021	0.00636885	0.00632008	0.00674847	None	0	0	FALSE	FALSE		None
chr1	15534089	15534581	74220	M	None	0.0193	0.0134	0.0107	None	0.016	Other	1.4403	1.49533	Kcnb2	0.0134	0.0133	0.0137	0.0104	0.0094	0.0125	0.0191	0.0194	0.0199	0.0165	0.0165	0.0145	0.00603021	0.00636885	0.00632008	0.00674847	None	0	1	FALSE	FALSE	mA20-DS16695	None
chr1	15556130	15557379	74221	M	None	0.0215	0.0139	0.0119	None	0.0155	Other	1.54676	1.30252	Kcnb2	0.0153	0.0114	0.0131	0.0121	0.0118	0.0115	0.0239	0.0209	0.0149	0.0159	0.015	0.015	0.00603021	0.00636885	0.00632008	0.00674847	None	0	1	FALSE	FALSE	mCerebellum-DS14034	None
chr1	15557440	15557866	74222	M	None	0.0187	0.015	0.0087	None	0.0146	Other	1.24667	1.67816	Kcnb2	0.0159	0.0145	0.0135	0.0081	0.01	0.0091	0.02	0.0142	0.0202	0.015	0.0135	0.0149	0.00603021	0.00636885	0.00632008	0.00674847	None	0	0	FALSE	FALSE		None
chr1	15576409	15577025	74224	M	None	0.0201	0.0129	0.0121	None	0.0145	Other	1.55814	1.19835	Kcnb2	0.0101	0.0192	0.0128	0.0122	0.0075	0.0155	0.0202	0.0183	0.022	0.0138	0.0129	0.0179	0.00603021	0.00636885	0.00632008	0.00674847	None	0	2	FALSE	FALSE	CH12-DS22542 mA20-DS16695	None
chr1	15611760	15612444	74225	I	I	0.0171	0.0213	0.0216	None	0.0151	Other	0.802817	0.699074	Kcnb2	0.0176	0.0206	0.0314	0.0228	0.0226	0.0176	0.0172	0.0202	0.013	0.0131	0.0139	0.0213	0.00603021	0.00636885	0.00632008	0.00674847	None	0	1	FALSE	FALSE	mMesoderm-DS18198	None
chr1	15634768	15635441	74226	I	M	0.0152	0.0196	0.0112	None	0.0213	Other	0.77551	1.90179	Kcnb2	0.0238	0.0126	0.0171	0.0115	0.0107	0.0109	0.0157	0.0153	0.0134	0.0198	0.0247	0.0216	0.00603021	0.00636885	0.00632008	0.00674847	None	0	2	FALSE	FALSE	mKidney-DS13948 mCD1-DS17129	None
chr1	15639710	15645084	74227	IM	M	0.0306	0.0217	0.0121	None	0.0213	Other	1.41014	1.76033	Kcnb2	0.0225	0.0219	0.0195	0.0126	0.0111	0.0114	0.0342	0.0249	0.0256	0.0203	0.0237	0.0214	0.00603021	0.00636885	0.00632008	0.00674847	None	0	7	FALSE	FALSE	mCerebrum-DS14024 mMuscle_Skeletal-DS18130 E14-DS21450 ZhBTc4-DS17616 mMuscle_Skeletal-DS18130 mBrain-DS12727 mCJ7-DS13320 mIntestine_Large-DS19140	None
chr1	15647426	15648135	74229	M	None	0.0201	0.016	0.013	None	0.0184	Other	1.25625	1.41538	Kcnb2	0.0138	0.0195	0.0175	0.0138	0.013	0.0105	0.02	0.0207	0.0198	0.0177	0.0173	0.021	0.00603021	0.00636885	0.00632008	0.00674847	None	0	0	FALSE	FALSE		None
chr1	15684795	15685177	74232	M	None	0.0194	0.015	0.0145	None	0.0157	Other	1.29333	1.08276	Kcnb2	0.0152	0.0148	0.0148	0.0147	0.009	0.0183	0.0177	0.0216	0.022	0.0136	0.0145	0.022	0.00603021	0.00636885	0.00632008	0.00674847	None	0	1	FALSE	FALSE	ZhBTc4-DS15236	None
chr1	15685399	15686202	74233	IM	None	0.0198	0.0147	0.0129	None	0.0168	Other	1.34694	1.30233	Kcnb2	0.0171	0.0136	0.01	0.0116	0.0179	0.0123	0.0161	0.0256	0.0245	0.0171	0.0147	0.0184	0.00603021	0.00636885	0.00632008	0.00674847	None	0	0	FALSE	FALSE		None
chr1	15690007	15690520	74234	M	None	0.0207	0.0152	0.0162	None	0.018	Other	1.36184	1.11111	Kcnb2	0.0121	0.0206	0.0168	0.0161	0.0211	0.0126	0.0207	0.0213	0.0201	0.0177	0.0183	0.0183	0.00603021	0.00636885	0.00632008	0.00674847	None	0	0	FALSE	FALSE		None
chr1	15700497	15701596	74235	IM	M	0.021	0.0197	0.0131	None	0.0234	Other	1.06599	1.78626	Kcnb2	0.0216	0.0211	0.0134	0.0134	0.0107	0.0143	0.0225	0.0193	0.0184	0.0243	0.0226	0.0219	0.00603021	0.00636885	0.00632008	0.00674847	None	0	2	FALSE	FALSE	mCerebrum-DS14024 ZhBTc4-DS17616	None
chr1	15748352	15749381	74236	IM	M	0.018	0.019	0.0122	None	0.0202	Other	0.947368	1.65574	Terf1	0.0221	0.0146	0.0162	0.0118	0.0136	0.0124	0.0165	0.0192	0.0215	0.0207	0.0179	0.0217	0.00603021	0.00636885	0.00632008	0.00674847	None	0	0	FALSE	FALSE		None
chr1	15758927	15759223	74237	None	M	0.0166	0.0141	0.0109	None	0.0216	Other	1.1773	1.98165	Terf1	0.0165	0.0085	0.0147	0.0109	0.0095	0.012	0.0129	0.0147	0.0307	0.0218	0.0217	0.0209	0.00603021	0.00636885	0.00632008	0.00674847	None	0	1	FALSE	FALSE	E14-DS21450	None
chr1	15773647	15774279	74239	M	None	0.0195	0.0143	0.0128	None	0.0159	Other	1.36364	1.24219	Terf1	0.0129	0.017	0.0147	0.0109	0.014	0.0171	0.0201	0.0207	0.0162	0.0178	0.0103	0.0171	0.00603021	0.00636885	0.00632008	0.00674847	None	0	0	FALSE	FALSE		None
chr1	15781167	15781506	74240	I	I	0.0121	0.0196	0.0214	None	0.0154	Enhancer4	0.617347	0.719626	Terf1	0.0202	0.0172	0.0212	0.0195	0.0202	0.028	0.0109	0.0117	0.0166	0.0141	0.0091	0.0253	0.00603021	0.00636885	0.00632008	0.00674847	None	0	1	FALSE	FALSE	mESC_FIKO-DS17063 mESC_FIKO-DS17063	None
chr1	15781770	15782439	74241	I	I	0.0114	0.0167	0.0233	None	0.0114	Other	0.682635	0.48927	Terf1	0.0154	0.0163	0.0203	0.0227	0.0226	0.0253	0.0097	0.0145	0.0132	0.01	0.0094	0.017	0.00603021	0.00636885	0.00632008	0.00674847	None	0	2	FALSE	FALSE	ZhBTc4-DS17616 ZhBTc4-DS17562	None
chr1	15786206	15786812	74242	M	None	0.0209	0.0162	0.0162	None	0.017	Other	1.29012	1.04938	Terf1	0.0134	0.0159	0.0238	0.0173	0.0103	0.018	0.021	0.0213	0.0198	0.0162	0.0185	0.0174	0.00603021	0.00636885	0.00632008	0.00674847	None	0	1	FALSE	FALSE	mKidney-DS13948 mKidney-DS13948	None
chr1	15787056	15787539	74243	M	None	0.0201	0.0148	0.0159	None	0.0161	Other	1.35811	1.01258	Terf1	0.0104	0.0228	0.0165	0.0144	0.0162	0.0201	0.02	0.0221	0.0183	0.0133	0.0176	0.0213	0.00603021	0.00636885	0.00632008	0.00674847	None	0	0	FALSE	FALSE		None
chr1	15794934	15796796	74244	IM	IM	0.0575	0.0688	0.0774	I	0.0593	AllTSS2	0.835756	0.76615	Terf1	0.0676	0.0671	0.074	0.0851	0.0517	0.0774	0.0581	0.0554	0.0582	0.0454	0.0821	0.07	0.00603021	0.00636885	0.00632008	0.00674847	cUMR	1422	6	FALSE	FALSE	E14-DS21450 E14-DS21450 mGER-DS15400 mPATSKI-DS15697 ZhBTc4-DS17562 mfLiver_F5-DS20999 mLiver-DS14005	None
chr1	15806262	15806680	74245	None	I	0.0149	0.0129	0.0205	None	0.0115	Enhancer4	1.15504	0.560976	Terf1	0.0101	0.0141	0.0186	0.0213	0.0224	0.0166	0.0147	0.0126	0.0182	0.0069	0.0149	0.0195	0.00603021	0.00636885	0.00632008	0.00674847	None	0	1	FALSE	FALSE	m416B-DS14099	None
chr1	15865529	15866171	74246	IM	M	0.0201	0.0169	0.014	None	0.0179	Enhancer4	1.18935	1.27857	Gm106	0.0152	0.0145	0.0238	0.0107	0.0194	0.0186	0.0186	0.0269	0.0167	0.0174	0.0198	0.0171	0.00603021	0.00636885	0.00632008	0.00674847	None	0	2	FALSE	FALSE	mFibroblast-DS10088 mGenitalFatPad-DS18780	None
chr1	15877394	15877945	74247	M	None	0.0211	0.0138	0.0119	None	0.0175	Other	1.52899	1.47059	Gm106	0.0116	0.0151	0.0177	0.0109	0.0147	0.0121	0.021	0.0226	0.0198	0.0161	0.0181	0.0202	0.00603021	0.00636885	0.00632008	0.00674847	None	0	0	FALSE	FALSE		None
chr1	15878924	15879399	74248	M	None	0.0208	0.0166	0.0144	None	0.0191	Other	1.25301	1.32639	Gm106	0.0159	0.0154	0.02	0.0139	0.0152	0.0152	0.0215	0.0192	0.0204	0.0186	0.0187	0.0208	0.00603021	0.00636885	0.00632008	0.00674847	None	0	0	FALSE	FALSE		None
chr1	15879874	15880197	74249	M	None	0.0217	0.017	0.0131	None	0.0171	Other	1.27647	1.30534	Gm106	0.0173	0.016	0.0175	0.0147	0.0092	0.0122	0.0249	0.0136	0.0211	0.02	0.0171	0.01	0.00603021	0.00636885	0.00632008	0.00674847	None	0	1	FALSE	FALSE	mGenitalFatPad-DS18780	None
chr1	15880468	15885765	74250	IM	M	0.0322	0.0273	0.0138	None	0.0249	AllTSS2	1.17949	1.80435	Gm106	0.0299	0.0274	0.0205	0.0137	0.0137	0.0141	0.0352	0.029	0.0266	0.0221	0.029	0.0272	0.00603021	0.00636885	0.00632008	0.00674847	None	0	6	FALSE	FALSE	mKidney-DS13948 mRetina-DS19060 ZhBTc4-DS17562 mESC_F4WT-DS17060 mCJ7-DS13320 mGenitalFatPad-DS18780	None
chr1	15886290	15886612	74251	M	None	0.0221	0.0197	0.0155	None	0.0141	Other	1.12183	0.909677	Gm106	0.0174	0.0225	0.0221	0.0164	0.0121	0.0156	0.0267	0.0139	0.0172	0.0126	0.0074	0.0248	0.00603021	0.00636885	0.00632008	0.00674847	None	0	0	FALSE	FALSE		None
chr1	15904321	15904658	74252	M	None	0.0192	0.0167	0.0143	None	0.0178	Enhancer4	1.1497	1.24476	Gm106	0.0195	0.0165	0.01	0.0126	0.023	0.0118	0.0176	0.021	0.0224	0.0161	0.0184	0.0217	0.00603021	0.00636885	0.00632008	0.00674847	None	0	0	FALSE	FALSE		None
chr1	15925241	15927066	74254	I	IM	0.0145	0.0188	0.0256	I	0.0191	Enhancer4	0.771277	0.746094	Gm106	0.0157	0.0227	0.0219	0.0127	0.0405	0.049	0.0124	0.0165	0.0187	0.0117	0.0258	0.0302	0.00603021	0.00636885	0.00632008	0.00674847	None	0	5	FALSE	FALSE	mCJ7-DS13320 mGER-DS15410 mGER-DS15410 MEL-DS13036 mPATSKI-DS15697 mIntestine_Large-DS19140	None
chr1	15980847	15981426	74255	None	M	0.0155	0.0183	0.0151	None	0.0239	Other	0.846995	1.58278	Gm106	0.0194	0.0159	0.018	0.016	0.0177	0.0105	0.0142	0.0185	0.016	0.0265	0.0233	0.0182	0.00603021	0.00636885	0.00632008	0.00674847	None	0	1	FALSE	FALSE	mCerebellum-DS14034	None
chr1	15983578	15984144	74256	None	I	0.0165	0.0171	0.0235	None	0.0178	Other	0.964912	0.757447	Gm106	0.0155	0.0201	0.0178	0.0183	0.0328	0.0301	0.0167	0.0153	0.0171	0.0161	0.0185	0.0212	0.00603021	0.00636885	0.00632008	0.00674847	None	0	2	FALSE	FALSE	CH12-DS22542 mPATSKI-DS15697	None
chr1	15985177	15985685	74257	M	None	0.0197	0.0142	0.0151	None	0.0154	Other	1.38732	1.01987	Gm106	0.0144	0.0118	0.0163	0.0186	0.0131	0.0071	0.0175	0.021	0.025	0.0106	0.0221	0.0203	0.00603021	0.00636885	0.00632008	0.00674847	None	0	0	FALSE	FALSE		None
chr1	15985981	15987012	74258	M	M	0.0207	0.0157	0.0152	None	0.0189	Other	1.31847	1.24342	Rpl7	0.0158	0.0164	0.0147	0.0149	0.0191	0.0129	0.0178	0.0272	0.0223	0.0188	0.0174	0.0205	0.00603021	0.00636885	0.00632008	0.00674847	None	0	4	FALSE	FALSE	mPATSKI-DS15697 E14-DS21450 ZhBTc4-DS17562 mLiver-DS14005	None
chr1	15987046	15987491	74259	M	None	0.0201	0.0166	0.0151	None	0.019	Other	1.21084	1.25828	Rpl7	0.021	0.0117	0.0113	0.0148	0.0101	0.0202	0.0208	0.0191	0.0193	0.0209	0.0151	0.0183	0.00603021	0.00636885	0.00632008	0.00674847	None	0	1	FALSE	FALSE	mLiver-DS14005 mLiver-DS14005	None
chr1	15988464	15988989	74260	M	None	0.0215	0.0165	0.0142	None	0.0168	Other	1.30303	1.1831	Rpl7	0.01	0.0259	0.0217	0.0136	0.0152	0.0147	0.0202	0.0292	0.0165	0.0165	0.0143	0.0203	0.00603021	0.00636885	0.00632008	0.00674847	None	0	0	FALSE	FALSE		None
chr1	15996744	15997385	74261	IM	I	0.0183	0.0211	0.0239	None	0.02	Other	0.867299	0.83682	Rpl7	0.0192	0.0194	0.0279	0.0222	0.0269	0.0263	0.0165	0.014	0.0291	0.0206	0.0145	0.0246	0.00603021	0.00636885	0.00632008	0.00674847	None	0	1	FALSE	FALSE	E14-DS21450	None
chr1	16036990	16037418	74262	M	None	0.0206	0.0189	0.0126	None	0.0171	Other	1.08995	1.35714	Rpl7	0.0172	0.021	0.0209	0.0118	0.0182	0.01	0.0222	0.0184	0.0179	0.0158	0.0212	0.0159	0.00603021	0.00636885	0.00632008	0.00674847	None	0	0	FALSE	FALSE		None
chr1	16075431	16075734	74263	M	None	0.016	0.0139	0.012	None	0.017	Other	1.15108	1.41667	4930444P10Rik	0.0097	0.0225	0.0144	0.0142	0.0123	0.0055	0.0178	0.0143	0.0124	0.0145	0.017	0.0232	0.00603021	0.00636885	0.00632008	0.00674847	None	0	0	FALSE	FALSE		None
chr1	16082279	16084443	74264	IM	M	0.0241	0.0247	0.0103	None	0.0184	AllTSS2	0.975709	1.78641	4930444P10Rik	0.0295	0.0215	0.0162	0.0102	0.0116	0.0098	0.0246	0.0236	0.0234	0.0176	0.0221	0.0164	0.00603021	0.00636885	0.00632008	0.00674847	None	0	3	FALSE	FALSE	mfBrain-DS14536 mMesoderm-DS18198 mMesoderm-DS18198 ZhBTc4-DS15236	None
chr1	16089433	16090664	74265	None	I	0.0139	0.0159	0.0247	None	0.0164	Other	0.874214	0.663968	Rpl7	0.0141	0.0172	0.0189	0.0266	0.0198	0.0235	0.0135	0.0155	0.0135	0.0156	0.0167	0.018	0.00603021	0.00636885	0.00632008	0.00674847	None	0	7	FALSE	FALSE	CH12-DS22542 mA20-DS16695 mCerebrum-DS14024 E14-DS21450 mfLiver_F2-DS20994 ZhBTc4-DS15236 mGER-DS15410	None
chr1	16091037	16091288	74266	None	I	0.0165	0.0116	0.0229	None	0.0092	Enhancer4	1.42241	0.401747	Rpl7	0.0101	0.013	0.0137	0.0245	0.0171	0.0232	0.015	0.0187	0.0189	0.0083	0.0078	0.0132	0.00603021	0.00636885	0.00632008	0.00674847	None	0	1	FALSE	FALSE	m416B-DS14099	None
chr1	16091584	16091839	74267	None	I	0.0115	0.0107	0.0191	None	0.0113	Enhancer4	1.07477	0.591623	Rpl7	0.0089	0.0134	0.0119	0.0198	0.0176	0.0184	0.0121	0.0129	0.0081	0.01	0.0117	0.0141	0.00603021	0.00636885	0.00632008	0.00674847	None	0	1	FALSE	FALSE	ZhBTc4-DS17616	None
chr1	16092053	16092614	74268	None	I	0.0129	0.0163	0.0221	None	0.0148	AllTSS2	0.791411	0.669683	Rpl7	0.0154	0.0142	0.0212	0.0275	0.0132	0.0144	0.015	0.0082	0.0116	0.0132	0.0225	0.011	0.00603021	0.00636885	0.00632008	0.00674847	None	0	2	FALSE	FALSE	E14-DS21450 mGER-DS15400	None
chr1	16093083	16093534	74269	None	I	0.0138	0.0184	0.0238	None	0.0146	Other	0.75	0.613445	Rpl7	0.0185	0.0217	0.0142	0.0257	0.0231	0.0191	0.0139	0.0131	0.0145	0.0155	0.013	0.014	0.00603021	0.00636885	0.00632008	0.00674847	cUMR	3244	2	FALSE	FALSE	CH12-DS22542 mGER-DS15420	None
chr1	16093710	16096723	74270	IM	IM	0.047	0.0643	0.0571	None	0.045	AllTSS2	0.730949	0.788091	Rpl7 Rdh10	0.0683	0.0614	0.0578	0.0676	0.029	0.0513	0.0552	0.0358	0.0344	0.0465	0.0487	0.0375	0.00603021	0.00636885	0.00632008	0.00674847	cUMR	3244	9	FALSE	FALSE	mRetina-DS19060 mRetina-DS19060 mBrain-DS12727 mMuscle_Skeletal-DS18130 mThymus-DS18819 mATn-DS17070 mNIH_3T3-DS16900 m3134-DS8497 m3134-DS8497 m3134-DS8497 mPATSKI-DS15697 mGER-DS15400	None
chr1	16105124	16105700	74271	None	I	0.0105	0.0149	0.0235	None	0.017	Other	0.704698	0.723404	Rdh10	0.0137	0.0153	0.0176	0.0235	0.0279	0.0201	0.0103	0.0108	0.0109	0.0179	0.0167	0.0151	0.00603021	0.00636885	0.00632008	0.00674847	None	0	1	FALSE	FALSE	mTN-DS16171	None
chr1	16123863	16124348	74272	IM	M	0.0216	0.023	0.0173	None	0.0265	Other	0.93913	1.53179	Rdh10	0.0265	0.019	0.0188	0.0174	0.015	0.019	0.0214	0.0256	0.0177	0.0282	0.0271	0.0217	0.00603021	0.00636885	0.00632008	0.00674847	None	0	0	FALSE	FALSE		None
chr1	16160588	16161110	74273	M	None	0.0231	0.0215	0.0154	None	0.0246	Other	1.07442	1.5974	Rdh10	0.0211	0.0261	0.0171	0.0152	0.0135	0.0177	0.0211	0.0264	0.0258	0.0198	0.0242	0.0368	0.00603021	0.00636885	0.00632008	0.00674847	None	0	0	FALSE	FALSE		None
chr1	16162355	16163097	74274	IM	M	0.0257	0.0258	0.0132	None	0.0258	Other	0.996124	1.95455	Rdh10	0.0302	0.0173	0.0244	0.0137	0.0137	0.0115	0.0278	0.0254	0.0194	0.0254	0.0269	0.0256	0.00603021	0.00636885	0.00632008	0.00674847	None	0	2	FALSE	FALSE	mIntestine_Large-DS19140 mPATSKI-DS15697	None
chr1	16163317	16163821	74275	M	None	0.0239	0.0232	0.0153	None	0.0235	Other	1.03017	1.53595	Rdh10	0.0222	0.0247	0.024	0.016	0.0147	0.014	0.0206	0.0314	0.0255	0.0215	0.0273	0.0245	0.00603021	0.00636885	0.00632008	0.00674847	None	0	1	FALSE	FALSE	mMesoderm-DS18198	None
chr1	16163929	16164242	74276	I	None	0.0189	0.0239	0.0119	None	0.024	Other	0.790795	2.01681	Rdh10	0.0258	0.0199	0.024	0.0111	0.0132	0.013	0.0185	0.0203	0.0185	0.0258	0.0228	0.0209	0.00603021	0.00636885	0.00632008	0.00674847	None	0	0	FALSE	FALSE		None
chr1	16164325	16164830	74277	M	None	0.0208	0.0228	0.0154	None	0.0204	Other	0.912281	1.32468	Rdh10	0.029	0.013	0.0184	0.0143	0.0159	0.0183	0.0206	0.0217	0.0203	0.0239	0.0137	0.0189	0.00603021	0.00636885	0.00632008	0.00674847	None	0	0	FALSE	FALSE		None
chr1	16172953	16175091	74278	M	M	0.0255	0.0203	0.0147	None	0.0234	Other	1.25616	1.59184	Rdh10	0.0202	0.0196	0.0211	0.0151	0.0136	0.0146	0.0238	0.0266	0.0296	0.0208	0.0272	0.0259	0.00603021	0.00636885	0.00632008	0.00674847	None	0	2	FALSE	FALSE	mPATSKI-DS15697 mESC_FIKO-DS17063	None
chr1	16182343	16182629	74279	M	None	0.0238	0.0193	0.0139	None	0.0236	Other	1.23316	1.69784	Rdh10	0.0188	0.0143	0.0264	0.0141	0.0099	0.0166	0.0186	0.0203	0.0444	0.017	0.0305	0.0326	0.00603021	0.00636885	0.00632008	0.00674847	None	0	0	FALSE	FALSE		None
chr1	16183387	16184044	74280	M	None	0.0239	0.0182	0.0146	None	0.0231	Other	1.31319	1.58219	Rdh10	0.0185	0.0164	0.0197	0.014	0.014	0.0169	0.0258	0.0209	0.0213	0.0251	0.0223	0.0189	0.00603021	0.00636885	0.00632008	0.00674847	None	0	1	FALSE	FALSE	mHindlimbsBuds-DS18279	None
chr1	16192767	16193173	74281	M	None	0.0213	0.0205	0.019	None	0.0254	Other	1.03902	1.33684	Rdh10	0.0221	0.0131	0.0251	0.0187	0.0171	0.0213	0.0213	0.0216	0.0209	0.024	0.0279	0.0265	0.00603021	0.00636885	0.00632008	0.00674847	None	0	0	FALSE	FALSE		None
chr1	16204296	16204652	74282	M	None	0.0225	0.0221	0.0122	None	0.0261	Other	1.0181	2.13934	Rdh10	0.0243	0.024	0.0143	0.0154	0.0075	0.0073	0.0217	0.0246	0.0225	0.0302	0.025	0.0172	0.00603021	0.00636885	0.00632008	0.00674847	None	0	1	FALSE	FALSE	mForelimbBuds-DS18275	None
chr1	16205755	16206510	74283	IM	None	0.024	0.0211	0.0155	None	0.022	Other	1.13744	1.41935	Rdh10	0.0226	0.0202	0.0185	0.0157	0.0184	0.0124	0.0248	0.0183	0.0285	0.021	0.0238	0.0227	0.00603021	0.00636885	0.00632008	0.00674847	None	0	1	FALSE	FALSE	mMesoderm-DS18198	None
chr1	16208147	16208756	74284	M	None	0.0219	0.0176	0.0167	None	0.0238	Other	1.24432	1.42515	Rdh10	0.0174	0.0188	0.0166	0.0151	0.0179	0.0199	0.0205	0.0195	0.0293	0.0246	0.0231	0.0224	0.00603021	0.00636885	0.00632008	0.00674847	None	0	2	FALSE	FALSE	mKidney-DS13948 mPATSKI-DS15697	None
chr1	16210011	16210635	74285	M	None	0.0235	0.0185	0.016	None	0.0222	Other	1.27027	1.3875	Rdh10	0.021	0.0158	0.0153	0.0161	0.0177	0.0141	0.0206	0.0225	0.0343	0.0212	0.0243	0.0224	0.00603021	0.00636885	0.00632008	0.00674847	None	0	2	FALSE	FALSE	mPATSKI-DS15697 m416B-DS14099	None
chr1	16214251	16214506	74286	M	None	0.0186	0.018	0.0107	None	0.0189	Other	1.03333	1.76636	Rdh10	0.017	0.0236	0.014	0.011	0.0066	0.013	0.0195	0.0188	0.0158	0.0188	0.0168	0.0213	0.00603021	0.00636885	0.00632008	0.00674847	None	0	1	FALSE	FALSE	mPATSKI-DS15697 mPATSKI-DS15697	None
chr1	16218031	16218790	74287	IM	M	0.0208	0.0227	0.0155	None	0.0285	Other	0.9163	1.83871	Rdh10	0.0254	0.0197	0.019	0.0156	0.0131	0.0171	0.0191	0.0223	0.0245	0.0303	0.0306	0.0219	0.00603021	0.00636885	0.00632008	0.00674847	None	0	3	FALSE	FALSE	mPATSKI-DS15697 mLung-DS14479 mIntestine_Large-DS19140	None
chr1	16224712	16225013	74288	M	None	0.0195	0.0137	0.0181	None	0.0228	Other	1.42336	1.25967	Stau2	0.0138	0.0123	0.0151	0.0141	0.0222	0.0259	0.0208	0.0207	0.0143	0.0267	0.0159	0.0205	0.00603021	0.00636885	0.00632008	0.00674847	None	0	1	FALSE	FALSE	mMesoderm-DS18198	None
chr1	16246557	16246808	74289	None	M	0.0123	0.0119	0.0139	None	0.0256	Other	1.03361	1.84173	Stau2	0.0114	0.0169	0.0073	0.0139	0.0151	0.0127	0.0133	0.0097	0.0123	0.0261	0.026	0.0237	0.00603021	0.00636885	0.00632008	0.00674847	None	0	0	FALSE	FALSE		None
chr1	16259315	16259831	74290	M	None	0.0204	0.0177	0.0127	None	0.0228	Other	1.15254	1.79528	Stau2	0.0207	0.0123	0.0161	0.0133	0.0116	0.0119	0.0202	0.0197	0.022	0.0242	0.0194	0.0231	0.00603021	0.00636885	0.00632008	0.00674847	None	0	1	FALSE	FALSE	mGenitalFatPad-DS18780 mGenitalFatPad-DS18780	None
chr1	16300213	16300610	74291	M	None	0.0185	0.0122	0.0133	None	0.0128	Other	1.51639	0.962406	Stau2	0.0106	0.0141	0.0143	0.0116	0.0217	0.0111	0.0127	0.0208	0.0338	0.0129	0.0115	0.0139	0.00603021	0.00636885	0.00632008	0.00674847	None	0	1	FALSE	FALSE	mLiver-DS14005	None
chr1	16302141	16302432	74292	M	None	0.0223	0.016	0.0143	None	0.0151	Other	1.39375	1.05594	Stau2	0.0173	0.0134	0.0161	0.0141	0.0144	0.0147	0.0216	0.0221	0.0247	0.0138	0.0146	0.0187	0.00603021	0.00636885	0.00632008	0.00674847	None	0	0	FALSE	FALSE		None
chr1	16302733	16303095	74293	M	None	0.0217	0.0121	0.0158	None	0.0191	Other	1.79339	1.20886	Stau2	0.0124	0.013	0.0103	0.0162	0.0178	0.0131	0.021	0.0231	0.0221	0.0192	0.0226	0.015	0.00603021	0.00636885	0.00632008	0.00674847	None	0	0	FALSE	FALSE		None
chr1	16315414	16315797	74294	M	None	0.0186	0.0124	0.012	None	0.0112	Other	1.5	0.933333	Stau2	0.0124	0.0146	0.01	0.0123	0.0158	0.008	0.0155	0.0149	0.0328	0.0122	0.0091	0.0111	0.00603021	0.00636885	0.00632008	0.00674847	None	0	0	FALSE	FALSE		None
chr1	16349518	16349807	74295	M	None	0.0186	0.0116	0.0075	None	0.012	Other	1.60345	1.6	Stau2	0.0117	0.0114	0.012	0.0065	0.0048	0.0126	0.0219	0.0105	0.0177	0.0122	0.0109	0.0128	0.00603021	0.00636885	0.00632008	0.00674847	None	0	0	FALSE	FALSE		None
chr1	16350950	16351710	74296	M	None	0.0195	0.0135	0.0163	None	0.0162	Other	1.44444	0.993865	Stau2	0.0137	0.0103	0.0168	0.0157	0.0151	0.0188	0.0204	0.0202	0.0158	0.0165	0.0162	0.0155	0.00603021	0.00636885	0.00632008	0.00674847	None	0	0	FALSE	FALSE		None
chr1	16351723	16351998	74297	M	None	0.0159	0.0122	0.011	None	0.0111	Other	1.30328	1.00909	Stau2	0.0109	0.0098	0.0184	0.0112	0.0107	0.0109	0.018	0.014	0.0114	0.0136	0.0079	0.0084	0.00603021	0.00636885	0.00632008	0.00674847	None	0	0	FALSE	FALSE		None
chr1	16366557	16367202	74298	M	None	0.0189	0.0092	0.0116	None	0.0138	Other	2.05435	1.18966	Stau2	0.0076	0.0099	0.0124	0.011	0.013	0.0121	0.0184	0.0143	0.0261	0.0129	0.0154	0.0144	0.00603021	0.00636885	0.00632008	0.00674847	None	0	0	FALSE	FALSE		None
chr1	16399012	16399806	74301	M	I	0.019	0.0139	0.0157	None	0.0169	Other	1.36691	1.07643	Stau2	0.0121	0.0147	0.0176	0.0154	0.0194	0.0136	0.0166	0.0222	0.0227	0.0139	0.0168	0.0245	0.00603021	0.00636885	0.00632008	0.00674847	None	0	0	FALSE	FALSE		None
chr1	16423397	16424043	74302	IM	I	0.016	0.0161	0.0227	None	0.0162	Other	0.993789	0.713656	Stau2	0.0162	0.0151	0.0173	0.0227	0.0273	0.0188	0.0161	0.0142	0.0181	0.0146	0.0176	0.0186	0.00603021	0.00636885	0.00632008	0.00674847	None	0	1	FALSE	FALSE	mPATSKI-DS15697	None
chr1	16430083	16430714	74303	None	I	0.0141	0.0124	0.0227	None	0.012	Other	1.1371	0.528634	Stau2	0.0132	0.0105	0.0126	0.0237	0.0243	0.0183	0.0173	0.0077	0.0115	0.0131	0.0113	0.01	0.00603021	0.00636885	0.00632008	0.00674847	None	0	1	FALSE	FALSE	CH12-DS22542	None
chr1	16449784	16450513	74304	IM	M	0.0201	0.0171	0.0149	None	0.0228	Other	1.17544	1.5302	Stau2	0.0119	0.0244	0.0218	0.0135	0.0188	0.0158	0.0181	0.025	0.0208	0.0202	0.0191	0.0332	0.00603021	0.00636885	0.00632008	0.00674847	None	0	0	FALSE	FALSE		None
chr1	16458950	16459216	74305	M	None	0.0205	0.0198	0.0149	None	0.0187	Other	1.03535	1.25503	Stau2	0.0223	0.0133	0.0211	0.0155	0.0201	0.0087	0.0163	0.0281	0.0247	0.0176	0.0145	0.0258	0.00603021	0.00636885	0.00632008	0.00674847	None	0	1	FALSE	FALSE	CH12-DS22542	None
chr1	16483265	16483975	74306	M	None	0.0211	0.012	0.0133	None	0.013	Other	1.75833	0.977444	Stau2	0.0111	0.0138	0.012	0.0147	0.0092	0.0128	0.0247	0.0158	0.016	0.012	0.0119	0.0166	0.00603021	0.00636885	0.00632008	0.00674847	None	0	0	FALSE	FALSE		None
chr1	16488747	16489014	74307	None	M	0.0159	0.0145	0.0115	None	0.0223	Other	1.09655	1.93913	Stau2	0.0172	0.0101	0.0128	0.0121	0.0066	0.0141	0.0166	0.016	0.0135	0.0238	0.0226	0.0186	0.00603021	0.00636885	0.00632008	0.00674847	None	0	0	FALSE	FALSE		None
chr1	16492777	16493705	74308	IM	M	0.0188	0.0229	0.017	None	0.0227	Other	0.820961	1.33529	Stau2	0.0268	0.0147	0.0225	0.0151	0.0186	0.0209	0.0202	0.0164	0.0172	0.0193	0.0245	0.0295	0.00603021	0.00636885	0.00632008	0.00674847	None	0	0	FALSE	FALSE		None
chr1	16494071	16496231	74309	IM	M	0.0219	0.0217	0.0143	None	0.0197	Other	1.00922	1.37762	Stau2	0.0225	0.0208	0.0206	0.0136	0.0151	0.0157	0.0227	0.0232	0.018	0.0175	0.0215	0.0234	0.00603021	0.00636885	0.00632008	0.00674847	None	0	1	FALSE	FALSE	mA20-DS16695	None
chr1	16504657	16505442	74310	M	None	0.0227	0.0178	0.0141	None	0.0172	Other	1.27528	1.21986	Stau2	0.0147	0.0266	0.0156	0.012	0.0197	0.0153	0.0251	0.0191	0.0192	0.0172	0.0166	0.0177	0.00603021	0.00636885	0.00632008	0.00674847	None	0	1	FALSE	FALSE	mFatPad-DS14021	None
chr1	16506111	16506467	74311	M	None	0.0179	0.0159	0.0105	None	0.0151	Other	1.12579	1.4381	Stau2	0.0181	0.0198	0.0058	0.0114	0.0092	0.0092	0.0179	0.0184	0.0177	0.0106	0.0256	0.0151	0.00603021	0.00636885	0.00632008	0.00674847	None	0	0	FALSE	FALSE		None
chr1	16506855	16509618	74312	IM	M	0.033	0.0312	0.0161	None	0.0257	AllTSS2	1.05769	1.59627	Stau2	0.0385	0.0257	0.0191	0.0159	0.0176	0.0156	0.0398	0.0245	0.0214	0.0219	0.0296	0.0308	0.00603021	0.00636885	0.00632008	0.00674847	cUMR	2153	5	FALSE	FALSE	mA20-DS16695 mGER-DS15400 mGER-DS15410 mPATSKI-DS15697 mMesoderm-DS18198 mA20-DS16695	None
chr1	16509628	16511240	74313	IM	None	0.0268	0.0268	0.0128	None	0.0172	AllTSS2	1	1.34375	Tceb1	0.0352	0.0191	0.0144	0.0113	0.0148	0.0153	0.0315	0.0175	0.0231	0.0147	0.0185	0.0221	0.00603021	0.00636885	0.00632008	0.00674847	cUMR	2153	5	FALSE	FALSE	mA20-DS16695 mMesoderm-DS18198 mBrain-DS12727 mfLiver_F1-DS20991 mCD19-DS16168	None
chr1	16511502	16512210	74314	M	None	0.0238	0.0193	0.0144	None	0.0168	Other	1.23316	1.16667	Tceb1	0.0177	0.0223	0.02	0.014	0.0177	0.0128	0.0247	0.0261	0.018	0.0162	0.0141	0.0209	0.00603021	0.00636885	0.00632008	0.00674847	None	0	0	FALSE	FALSE		None
chr1	16531287	16532171	74315	M	None	0.0241	0.0181	0.0161	None	0.0207	Other	1.33149	1.28571	Tceb1	0.0151	0.0175	0.0265	0.0152	0.0181	0.017	0.0248	0.0251	0.0207	0.0193	0.0225	0.0223	0.00603021	0.00636885	0.00632008	0.00674847	None	0	0	FALSE	FALSE		None
chr1	16552803	16553144	74316	M	None	0.0243	0.0229	0.0265	None	0.0215	Other	1.06114	0.811321	Tceb1	0.0172	0.0285	0.0309	0.0264	0.0337	0.021	0.0261	0.0187	0.0256	0.0169	0.0251	0.0292	0.00603021	0.00636885	0.00632008	0.00674847	None	0	1	FALSE	FALSE	MEL-DS13036	None
chr1	16607105	16607492	74318	M	None	0.0242	0.0144	0.0158	None	0.0165	Enhancer4	1.68056	1.0443	Ube2w	0.01	0.0181	0.021	0.0185	0.0124	0.0111	0.0269	0.0219	0.0183	0.016	0.0183	0.016	0.00603021	0.00636885	0.00632008	0.00674847	None	0	0	FALSE	FALSE		None
chr1	16607634	16610870	74319	IM	IM	0.0552	0.0739	0.0604	I	0.0394	AllTSS2	0.746955	0.652318	Ube2w	0.0799	0.0704	0.0624	0.0743	0.03	0.047	0.0684	0.0368	0.0351	0.0332	0.0537	0.0397	0.00603021	0.00636885	0.00632008	0.00674847	cUMR	2024	6	FALSE	FALSE	mPATSKI-DS15697 mCD19-DS16168 CH12-DS22542 m3134-DS8497 m3134-DS8497 mCD19-DS16168 mCerebellum-DS14034 mPATSKI-DS15697 mPATSKI-DS15697 mThymus-DS18819	None
chr1	16627438	16628285	74320	None	IM	0.0161	0.0176	0.0406	None	0.019	Other	0.914773	0.46798	Tceb1	0.0153	0.0192	0.0216	0.0493	0.0294	0.0253	0.0156	0.0162	0.0177	0.0157	0.0226	0.0235	0.00603021	0.00636885	0.00632008	0.00674847	None	0	3	FALSE	FALSE	mGER-DS15420 MEL-DS13036 mPATSKI-DS15697	None
chr1	16643051	16643934	74321	IM	IM	0.0236	0.0245	0.0462	None	0.0215	Enhancer4	0.963265	0.465368	Tceb1	0.0191	0.0302	0.0314	0.0412	0.0407	0.0649	0.0192	0.0252	0.0355	0.0159	0.0219	0.035	0.00603021	0.00636885	0.00632008	0.00674847	None	0	2	FALSE	FALSE	mfLiver-DS19246 mfLiver_F2-DS20994 mfLiver_F2-DS20994	None
chr1	16645332	16646084	74322	None	I	0.0203	0.0159	0.0331	None	0.0187	Other	1.27673	0.564955	Tceb1	0.0156	0.0128	0.0202	0.0352	0.0236	0.0354	0.0205	0.0202	0.0199	0.0164	0.0208	0.0222	0.00603021	0.00636885	0.00632008	0.00674847	None	0	3	FALSE	FALSE	mESC_FIKO-DS17063 mfLiver-DS19246 mfLiver-DS20666	None
chr1	16646244	16647986	74323	IM	IM	0.0487	0.0841	0.1332	None	0.0601	AllTSS2	0.579073	0.451201	Tceb1 D030040B21Rik	0.0693	0.0965	0.1072	0.1438	0.0777	0.1499	0.048	0.0511	0.0478	0.0585	0.0619	0.0624	0.00603021	0.00636885	0.00632008	0.00674847	cUMR	1467	6	FALSE	FALSE	mfLiver_F2-DS20994 mMesoderm-DS18198 mCD1-DS17129 CH12-DS22542 mfLiver_DLCR-DS19241 mGenitalFatPad-DS18780	None
chr1	16654781	16656418	74324	IM	IM	0.0439	0.0615	0.0524	None	0.041	AllTSS2	0.713821	0.782443	Tmem70	0.0649	0.0597	0.055	0.056	0.0376	0.055	0.0502	0.0364	0.0328	0.0285	0.0604	0.0513	0.00603021	0.00636885	0.00632008	0.00674847	cUMR	1001	5	FALSE	FALSE	mA20-DS16695 CH12-DS22542 m3134-DS8497 ZhBTc4-DS15236 mPATSKI-DS15697	None
chr1	16656681	16656993	74325	None	I	0.0155	0.0226	0.0295	None	0.0188	Enhancer4	0.685841	0.637288	Tmem70	0.0195	0.0227	0.0304	0.0299	0.0239	0.033	0.0175	0.0184	0.0055	0.017	0.0212	0.0206	0.00603021	0.00636885	0.00632008	0.00674847	None	0	2	FALSE	FALSE	mfLiver_F3-DS20937 mfLiver_F1-DS20991	None
chr1	16677409	16679359	74326	IM	IM	0.0306	0.0454	0.0729	None	0.047	AllTSS2	0.674009	0.644719	Ly96	0.0404	0.0493	0.0538	0.0763	0.0623	0.0722	0.0274	0.0348	0.0354	0.0414	0.0546	0.0529	0.00603021	0.00636885	0.00632008	0.00674847	cUMR	1121	4	TRUE	FALSE	ZhBTc4-DS17616 CH12-DS22542 CH12-DS22542 m416B-DS14099 mPATSKI-DS15697 CH12-DS22542	None
chr1	16679423	16680200	74327	IM	IM	0.0202	0.0195	0.0372	None	0.0227	Enhancer4	1.0359	0.610215	Ly96	0.0183	0.0206	0.0213	0.0428	0.0288	0.0287	0.0207	0.0197	0.0192	0.0181	0.0294	0.0273	0.00603021	0.00636885	0.00632008	0.00674847	None	0	1	TRUE	FALSE	mA20-DS16695	None
chr1	16693125	16693721	74328	I	None	0.017	0.0278	0.0203	None	0.0166	Enhancer4	0.611511	0.817734	Ly96	0.0278	0.0243	0.032	0.0165	0.0276	0.025	0.0134	0.0195	0.0253	0.0176	0.0158	0.0148	0.00603021	0.00636885	0.00632008	0.00674847	None	0	2	TRUE	FALSE	mCerebrum-DS14024 mA20-DS16695	None
chr1	16710672	16711390	74329	M	M	0.0232	0.0218	0.017	None	0.0246	Other	1.06422	1.44706	Ly96	0.0254	0.0154	0.02	0.0199	0.0077	0.0166	0.0235	0.0254	0.0197	0.0253	0.0265	0.0211	0.00603021	0.00636885	0.00632008	0.00674847	None	0	1	FALSE	FALSE	mA20-DS16695	None
chr1	16713820	16714111	74330	I	None	0.0183	0.023	0.0129	None	0.0187	Other	0.795652	1.44961	Ly96	0.027	0.0154	0.0219	0.012	0.0184	0.0107	0.0197	0.0115	0.0216	0.0247	0.0111	0.0115	0.00603021	0.00636885	0.00632008	0.00674847	None	0	0	FALSE	FALSE		None
chr1	16736128	16736488	74331	None	I	0.0104	0.0183	0.0296	None	0.0144	Other	0.568306	0.486486	Ly96	0.0171	0.0195	0.0198	0.0328	0.0311	0.0192	0.0094	0.0126	0.0109	0.011	0.0189	0.018	0.00603021	0.00636885	0.00632008	0.00674847	None	0	1	FALSE	FALSE	mA20-DS16695	None
chr1	16749113	16749364	74332	M	None	0.0206	0.0179	0.0107	None	0.018	Other	1.15084	1.68224	Ly96	0.0233	0.0086	0.0149	0.0111	0.0092	0.011	0.0211	0.0187	0.021	0.0209	0.0133	0.0158	0.00603021	0.00636885	0.00632008	0.00674847	None	0	1	FALSE	FALSE	mA20-DS16695 mA20-DS16695	None
chr1	16750902	16751153	74333	M	None	0.0197	0.0165	0.0142	None	0.0169	Other	1.19394	1.19014	Ly96	0.0117	0.0271	0.0164	0.0129	0.011	0.0205	0.0199	0.0187	0.0203	0.0173	0.0194	0.0133	0.00603021	0.00636885	0.00632008	0.00674847	None	0	1	FALSE	FALSE	mCerebrum-DS14024	None
chr1	16758872	16759406	74334	M	M	0.0177	0.0199	0.0179	None	0.0225	Other	0.889447	1.25698	Ly96	0.0215	0.0166	0.0198	0.0198	0.0148	0.0152	0.0138	0.0265	0.0199	0.0197	0.0298	0.0218	0.00603021	0.00636885	0.00632008	0.00674847	None	0	0	FALSE	FALSE		None
chr1	16759648	16760160	74335	None	M	0.0175	0.016	0.0149	None	0.0231	Other	1.09375	1.55034	Ly96	0.0188	0.0171	0.0079	0.0146	0.0154	0.0153	0.0168	0.0176	0.0197	0.0229	0.0232	0.0234	0.00603021	0.00636885	0.00632008	0.00674847	None	0	0	FALSE	FALSE		None
chr1	16782120	16782389	74336	M	None	0.0191	0.0166	0.0125	None	0.015	Other	1.1506	1.2	Ly96	0.0164	0.0172	0.0162	0.0107	0.0108	0.019	0.0186	0.0214	0.0181	0.0133	0.0151	0.0191	0.00603021	0.00636885	0.00632008	0.00674847	None	0	0	FALSE	FALSE		None
chr1	16785631	16786195	74337	M	M	0.0185	0.0135	0.0164	None	0.0191	Other	1.37037	1.16463	Ly96	0.0141	0.0134	0.0122	0.0168	0.0189	0.0129	0.0167	0.0193	0.0234	0.0204	0.0163	0.0188	0.00603021	0.00636885	0.00632008	0.00674847	None	0	0	FALSE	FALSE		None
chr1	16788111	16788970	74338	IM	IM	0.0144	0.0204	0.03	None	0.0174	Other	0.705882	0.58	Ly96	0.0228	0.0114	0.0248	0.0299	0.0322	0.0285	0.0122	0.0176	0.0177	0.0189	0.0112	0.02	0.00603021	0.00636885	0.00632008	0.00674847	None	0	1	FALSE	FALSE	mPATSKI-DS15697	None
chr1	16817746	16818264	74340	None	I	0.0122	0.0121	0.0136	None	0.0088	Other	1.00826	0.647059	Ly96	0.0115	0.0109	0.015	0.0121	0.016	0.016	0.0112	0.0144	0.013	0.0068	0.0125	0.0099	0.00603021	0.00636885	0.00632008	0.00674847	None	0	1	FALSE	FALSE	mGER-DS15400	None
chr1	16830847	16831431	74341	M	M	0.0209	0.0155	0.0153	None	0.0194	Other	1.34839	1.26797	Ly96	0.0159	0.0094	0.0217	0.0141	0.0176	0.017	0.0169	0.0293	0.0235	0.0189	0.0199	0.0199	0.00603021	0.00636885	0.00632008	0.00674847	None	0	0	FALSE	FALSE		None
chr1	16921818	16922703	74347	M	None	0.0201	0.0109	0.0109	None	0.0108	Other	1.84404	0.990826	Jph1	0.0069	0.016	0.015	0.0101	0.0136	0.0107	0.0188	0.0134	0.0319	0.0098	0.013	0.0109	0.00603021	0.00636885	0.00632008	0.00674847	None	0	0	FALSE	FALSE		None
chr1	16944793	16945298	74349	M	M	0.0181	0.0156	0.0116	None	0.0205	Other	1.16026	1.76724	Jph1	0.0151	0.0209	0.0108	0.0119	0.0165	0.0066	0.019	0.0176	0.0158	0.0149	0.0324	0.0218	0.00603021	0.00636885	0.00632008	0.00674847	None	0	0	FALSE	FALSE		None
chr1	16950960	16952142	74350	M	M	0.0225	0.0136	0.0165	None	0.0177	Other	1.65441	1.07273	Jph1	0.0137	0.0129	0.0143	0.0162	0.0158	0.0183	0.0231	0.0198	0.0238	0.0187	0.0135	0.0198	0.00603021	0.00636885	0.00632008	0.00674847	None	0	1	FALSE	FALSE	mPATSKI-DS15697	None
chr1	16952310	16953839	74351	M	None	0.0192	0.013	0.0138	None	0.0139	Other	1.47692	1.00725	Jph1	0.0112	0.0187	0.0108	0.0145	0.011	0.0142	0.0195	0.0163	0.0216	0.0146	0.0109	0.0154	0.00603021	0.00636885	0.00632008	0.00674847	None	0	0	FALSE	FALSE		None
chr1	16965078	16965672	74352	M	I	0.0206	0.013	0.0179	None	0.0177	Other	1.58462	0.988827	Jph1	0.0124	0.0122	0.0152	0.018	0.0212	0.015	0.0199	0.0204	0.0229	0.0186	0.0171	0.0163	0.00603021	0.00636885	0.00632008	0.00674847	None	0	0	FALSE	FALSE		None
chr1	16973422	16974135	74353	IM	M	0.0195	0.0178	0.0159	None	0.0188	Other	1.09551	1.18239	Jph1	0.0184	0.0178	0.0164	0.0156	0.0203	0.0131	0.0193	0.0173	0.0225	0.0232	0.0129	0.0142	0.00603021	0.00636885	0.00632008	0.00674847	None	0	1	FALSE	FALSE	CH12-DS22542	None
chr1	16974371	16974926	74354	IM	None	0.019	0.0167	0.0142	None	0.0158	Other	1.13772	1.11268	Jph1	0.0175	0.0192	0.0119	0.0118	0.0167	0.019	0.0178	0.0231	0.0182	0.0172	0.0154	0.0125	0.00603021	0.00636885	0.00632008	0.00674847	None	0	0	FALSE	FALSE		None
chr1	16989694	16990134	74355	M	None	0.02	0.0168	0.0178	None	0.0189	Other	1.19048	1.0618	Jph1	0.0172	0.0162	0.0166	0.0156	0.0212	0.021	0.0189	0.0212	0.022	0.0184	0.02	0.019	0.00603021	0.00636885	0.00632008	0.00674847	None	0	1	FALSE	FALSE	mMuscle_Skeletal-DS18130	None
chr1	17081451	17082049	74356	M	None	0.0193	0.0188	0.0122	None	0.0166	Other	1.0266	1.36066	Jph1	0.0215	0.0168	0.0145	0.0138	0.0085	0.0111	0.0213	0.0167	0.0162	0.016	0.0197	0.0148	0.00603021	0.00636885	0.00632008	0.00674847	None	0	2	FALSE	FALSE	ZhBTc4-DS15236 mESC_F4WT-DS17060	None
chr1	17083510	17083919	74357	M	None	0.0199	0.015	0.0112	None	0.0148	Other	1.32667	1.32143	Jph1	0.0112	0.0203	0.0185	0.0108	0.0102	0.0133	0.0207	0.0204	0.017	0.0139	0.0132	0.0187	0.00603021	0.00636885	0.00632008	0.00674847	None	0	0	FALSE	FALSE		None
chr1	17084243	17090731	74358	IM	IM	0.0388	0.0303	0.0131	None	0.0229	AllTSS2	1.28053	1.74809	Jph1	0.0354	0.0296	0.0183	0.0147	0.0113	0.0102	0.045	0.029	0.0305	0.021	0.0255	0.0251	0.00603021	0.00636885	0.00632008	0.00674847	cUMR	1626	7	FALSE	FALSE	mCerebellum-DS14034 mCerebellum-DS14034 mCerebrum-DS14024 mfBrain-DS14536 mCerebrum-DS14024 mMuscle_Skeletal-DS18130 mCD1-DS17129 ZhBTc4-DS17562 mMuscle_Skeletal-DS18130 ZhBTc4-DS15236 mCerebrum-DS14024 mMuscle_Skeletal-DS18130 mMuscle_Skeletal-DS18130	None
chr1	17091624	17092264	74359	M	None	0.0215	0.015	0.014	None	0.0143	Other	1.43333	1.02143	Jph1	0.0111	0.0214	0.0174	0.0159	0.0104	0.0115	0.0266	0.0115	0.0174	0.0154	0.0156	0.0102	0.00603021	0.00636885	0.00632008	0.00674847	None	0	1	FALSE	FALSE	CH12-DS22542	None
chr1	17093018	17093435	74360	IM	None	0.021	0.0186	0.0149	None	0.0158	Other	1.12903	1.0604	Jph1	0.0169	0.0217	0.019	0.015	0.0148	0.0145	0.023	0.0118	0.0256	0.0138	0.0177	0.0187	0.00603021	0.00636885	0.00632008	0.00674847	None	0	1	FALSE	FALSE	CH12-DS22542	None
chr1	17113454	17114486	74361	I	None	0.015	0.0157	0.0126	None	0.0161	Other	0.955414	1.27778	Jph1	0.0176	0.0115	0.016	0.0114	0.0122	0.0161	0.0151	0.0155	0.0143	0.0158	0.0128	0.0202	0.00603021	0.00636885	0.00632008	0.00674847	None	0	1	FALSE	FALSE	mPATSKI-DS15697	None
chr1	17116166	17116508	74362	M	None	0.0205	0.0091	0.0112	None	0.0137	Other	2.25275	1.22321	Jph1	0.0073	0.0099	0.0128	0.0107	0.0143	0.0097	0.0235	0.0176	0.0143	0.0145	0.0094	0.0163	0.00603021	0.00636885	0.00632008	0.00674847	None	0	0	FALSE	FALSE		None
chr1	17124367	17124816	74364	M	None	0.0215	0.0132	0.0143	None	0.0203	Other	1.62879	1.41958	Jph1	0.0117	0.0136	0.0163	0.0143	0.0161	0.0128	0.0207	0.0273	0.0175	0.02	0.0204	0.0209	0.00603021	0.00636885	0.00632008	0.00674847	None	0	0	FALSE	FALSE		None
chr1	17135341	17135862	74365	I	None	0.0116	0.0187	0.0149	None	0.0117	AllTSS2	0.620321	0.785235	Gdap1	0.0246	0.0112	0.0122	0.0139	0.0176	0.0152	0.0092	0.0177	0.0121	0.0122	0.0097	0.0123	0.00603021	0.00636885	0.00632008	0.00674847	None	0	2	FALSE	FALSE	mCerebellum-DS14034 mMesoderm-DS18198	None
chr1	17139856	17140127	74366	M	None	0.0192	0.016	0.0132	None	0.0169	Other	1.2	1.2803	Gdap1	0.0147	0.0166	0.0189	0.0137	0.0082	0.016	0.0182	0.0134	0.0295	0.0162	0.0115	0.0245	0.00603021	0.00636885	0.00632008	0.00674847	None	0	0	FALSE	FALSE		None
chr1	17140628	17140879	74367	None	M	0.0139	0.0115	0.0089	None	0.0198	Other	1.2087	2.22472	Gdap1	0.0126	0.012	0.008	0.0111	0.0086	0.0033	0.0129	0.0179	0.0121	0.0186	0.0233	0.0192	0.00603021	0.00636885	0.00632008	0.00674847	None	0	0	FALSE	FALSE		None
chr1	17147265	17147888	74368	M	None	0.0214	0.0138	0.0154	None	0.0156	Other	1.55072	1.01299	Gdap1	0.0113	0.0164	0.017	0.0146	0.0184	0.0154	0.0209	0.0197	0.0249	0.0139	0.0157	0.0198	0.00603021	0.00636885	0.00632008	0.00674847	None	0	0	FALSE	FALSE		None
chr1	17153547	17154194	74369	None	I	0.0121	0.0137	0.0208	None	0.0122	Other	0.883212	0.586538	Gdap1	0.0111	0.0172	0.0163	0.0183	0.0291	0.021	0.0126	0.0152	0.0069	0.0116	0.0105	0.0155	0.00603021	0.00636885	0.00632008	0.00674847	None	0	2	FALSE	FALSE	mPATSKI-DS15697 mGenitalFatPad-DS18780	None
chr1	17226067	17226594	74370	M	None	0.0167	0.0084	0.0105	None	0.0123	Other	1.9881	1.17143	Jph1	0.0097	0.0101	0.0033	0.0092	0.0147	0.0105	0.0152	0.0146	0.0239	0.0111	0.0146	0.0127	0.00603021	0.00636885	0.00632008	0.00674847	None	0	0	FALSE	FALSE		None
chr1	17297417	17298230	74373	M	I	0.0167	0.0119	0.0132	None	0.0167	Other	1.40336	1.26515	Jph1	0.0107	0.0157	0.0102	0.0131	0.0114	0.0151	0.0167	0.0173	0.0159	0.0183	0.0136	0.016	0.00603021	0.00636885	0.00632008	0.00674847	None	0	0	FALSE	FALSE		None
chr1	17299159	17299789	74374	None	M	0.0156	0.0127	0.0131	None	0.0146	Other	1.22835	1.1145	Jph1	0.013	0.0087	0.0163	0.0109	0.0171	0.0157	0.0152	0.0176	0.0147	0.0148	0.0129	0.0156	0.00603021	0.00636885	0.00632008	0.00674847	None	0	0	FALSE	FALSE		None
chr1	17510063	17511486	74391	M	M	0.0166	0.0115	0.011	None	0.0173	AllTSS2	1.44348	1.57273	Pi15	0.0132	0.0085	0.0107	0.0105	0.0132	0.0108	0.017	0.0166	0.0152	0.0194	0.0136	0.0161	0.00603021	0.00636885	0.00632008	0.00674847	None	0	0	FALSE	FALSE		None
chr1	17513235	17514448	74393	IM	M	0.0154	0.0179	0.0118	None	0.0205	Other	0.860335	1.73729	Pi15	0.0204	0.0115	0.0191	0.0111	0.0135	0.0125	0.0142	0.0187	0.0155	0.0236	0.0207	0.0128	0.00603021	0.00636885	0.00632008	0.00674847	None	0	1	FALSE	FALSE	mGenitalFatPad-DS18780	None
chr1	17619587	17620037	74400	None	I	0.0071	0.0073	0.0139	None	0.0054	Other	0.972603	0.388489	Pi15	0.0058	0.0083	0.0099	0.0148	0.0158	0.0096	0.0067	0.0095	0.0053	0.005	0.0064	0.0051	0.00603021	0.00636885	0.00632008	0.00674847	None	0	2	FALSE	FALSE	mA20-DS16695 CH12-DS22542	None
chr1	17653625	17654229	74406	M	None	0.0173	0.0129	0.0133	None	0.0131	Other	1.34109	0.984962	Pi15	0.0106	0.0135	0.0181	0.0119	0.0092	0.0205	0.017	0.0171	0.0185	0.0151	0.0108	0.0105	0.00603021	0.00636885	0.00632008	0.00674847	None	0	1	FALSE	FALSE	mFatPad-DS14021	None
chr1	17717303	17718073	74413	None	M	0.0137	0.0119	0.0081	None	0.0175	AllTSS2	1.15126	2.16049	Crispld1	0.0146	0.0093	0.0081	0.0076	0.0098	0.008	0.0143	0.0153	0.0102	0.0204	0.0142	0.0136	0.00603021	0.00636885	0.00632008	0.00674847	None	0	1	FALSE	FALSE	mMesoderm-DS18198 mMesoderm-DS18198	None
chr1	17970679	17971100	74426	None	I	0.0104	0.0074	0.0178	None	0.0089	Other	1.40541	0.5	Crisp4	0.0084	0.0028	0.0105	0.0159	0.0268	0.0156	0.0088	0.01	0.0159	0.0081	0.0067	0.013	0.00603021	0.00636885	0.00632008	0.00674847	None	0	1	FALSE	FALSE	mMesoderm-DS18198	None
chr1	17973661	17974218	74427	None	I	0.0151	0.0135	0.0167	None	0.0147	Other	1.11852	0.88024	Crisp4	0.0141	0.0151	0.01	0.0158	0.0161	0.0197	0.0149	0.019	0.0112	0.0166	0.0119	0.0128	0.00603021	0.00636885	0.00632008	0.00674847	None	0	0	FALSE	FALSE		None
chr1	18026201	18027904	74429	IM	M	0.0179	0.0153	0.0144	None	0.0206	Other	1.16993	1.43056	Crisp4	0.016	0.013	0.016	0.0147	0.0141	0.0137	0.0162	0.0171	0.0242	0.0217	0.0186	0.0201	0.00603021	0.00636885	0.00632008	0.00674847	None	0	0	FALSE	FALSE		None
chr1	18029595	18034824	74430	IM	IM	0.0234	0.0202	0.0133	None	0.0247	Other	1.15842	1.85714	Crisp4	0.0197	0.0212	0.0204	0.0135	0.0123	0.0134	0.0222	0.0259	0.0244	0.025	0.0259	0.0226	0.00603021	0.00636885	0.00632008	0.00674847	None	0	1	FALSE	FALSE	mBrain-DS12727	None
chr1	18046238	18046509	74431	M	None	0.0181	0.0114	0.01	None	0.0134	Other	1.58772	1.34	Crisp4	0.0125	0.0124	0.0073	0.0083	0.013	0.0124	0.0226	0.0128	0.0103	0.0104	0.0157	0.0182	0.00603021	0.00636885	0.00632008	0.00674847	None	0	0	FALSE	FALSE		None
chr1	18046794	18051702	74432	IM	M	0.0282	0.0242	0.0117	None	0.0199	Other	1.16529	1.70085	Crisp4	0.0271	0.0224	0.0192	0.0116	0.0113	0.0125	0.0316	0.0222	0.0249	0.0177	0.0237	0.0212	0.00603021	0.00636885	0.00632008	0.00674847	cUMR	2544	5	FALSE	FALSE	E14-DS21450 E14-DS21450 ZhBTc4-DS17562 mMesoderm-DS18198 mMesoderm-DS18198 mBrain-DS12727 mHindlimbsBuds-DS18279	None
chr1	18067591	18068205	74433	M	None	0.0127	0.0122	0.0076	None	0.0105	Other	1.04098	1.38158	Crisp4	0.0125	0.0059	0.0189	0.0084	0.0057	0.0072	0.0136	0.0134	0.0092	0.0093	0.0148	0.0093	0.00603021	0.00636885	0.00632008	0.00674847	None	0	1	FALSE	FALSE	E14-DS21450	None
chr1	18096785	18097177	74434	None	I	0.012	0.0086	0.0179	None	0.0095	Other	1.39535	0.530726	Crisp4	0.0093	0.0064	0.0093	0.0147	0.0278	0.0185	0.0108	0.0111	0.0169	0.011	0.0049	0.0104	0.00603021	0.00636885	0.00632008	0.00674847	None	0	1	FALSE	FALSE	CH12-DS22542	None
chr1	18120704	18121073	74435	M	None	0.0189	0.0107	0.0136	None	0.0126	Other	1.76636	0.926471	Crisp4	0.0091	0.0144	0.0105	0.0137	0.0147	0.0122	0.0185	0.018	0.0212	0.0139	0.0108	0.0114	0.00603021	0.00636885	0.00632008	0.00674847	None	0	0	FALSE	FALSE		None
chr1	18121724	18122205	74436	None	I	0.0085	0.0064	0.0147	None	0.0103	Other	1.32812	0.70068	Crisp4	0.0032	0.0109	0.0092	0.0133	0.0202	0.0144	0.0074	0.0081	0.0123	0.0083	0.0131	0.0123	0.00603021	0.00636885	0.00632008	0.00674847	None	0	1	FALSE	FALSE	mCerebrum-DS14024	None
chr1	18278765	18279506	74445	None	I	0.0108	0.0117	0.0179	None	0.0108	Other	0.923077	0.603352	Gm15386	0.0098	0.0174	0.01	0.0167	0.0212	0.0187	0.012	0.0096	0.0083	0.0133	0.0073	0.0085	0.00603021	0.00636885	0.00632008	0.00674847	None	0	1	FALSE	FALSE	mCJ7-DS13320	None
chr1	18284384	18287462	74447	M	None	0.0192	0.012	0.0072	None	0.01	Other	1.6	1.38889	Gm15386	0.0119	0.0138	0.0103	0.008	0.0074	0.0047	0.0235	0.0129	0.013	0.0095	0.0103	0.0107	0.00603021	0.00636885	0.00632008	0.00674847	None	0	1	FALSE	FALSE	mfBrain-DS14536	None
chr1	18312534	18313234	74450	I	None	0.014	0.0155	0.012	None	0.0138	Other	0.903226	1.15	Gm15386	0.0146	0.0157	0.0174	0.0119	0.0077	0.0159	0.0128	0.0153	0.0159	0.0127	0.0163	0.0136	0.00603021	0.00636885	0.00632008	0.00674847	None	0	0	FALSE	FALSE		None
chr1	18349864	18350606	74456	I	I	0.0129	0.0148	0.018	None	0.0095	Other	0.871622	0.527778	Gm15386	0.0133	0.0173	0.0156	0.0203	0.0129	0.016	0.0164	0.0061	0.0099	0.0093	0.0112	0.0084	0.00603021	0.00636885	0.00632008	0.00674847	None	0	1	FALSE	FALSE	mMesoderm-DS18198	None
chr1	18350924	18351420	74457	None	M	0.0144	0.0112	0.0098	None	0.0153	Other	1.28571	1.56122	Gm15386	0.0124	0.0097	0.0101	0.0112	0.0085	0.0071	0.0168	0.0075	0.0149	0.014	0.0162	0.0174	0.00603021	0.00636885	0.00632008	0.00674847	None	0	0	FALSE	FALSE		None
chr1	18475055	18475687	74466	M	None	0.0169	0.0059	0.008	None	0.0086	Other	2.86441	1.075	Gm15386	0.0058	0.0058	0.0065	0.0079	0.0062	0.0097	0.0177	0.0124	0.0197	0.0084	0.0082	0.0097	0.00603021	0.00636885	0.00632008	0.00674847	None	0	0	FALSE	FALSE		None
chr1	18481949	18483401	74467	M	M	0.0153	0.0147	0.0094	None	0.0139	Other	1.04082	1.47872	Gm15386	0.0161	0.0127	0.0135	0.0092	0.0091	0.01	0.0149	0.0173	0.014	0.0144	0.0144	0.0122	0.00603021	0.00636885	0.00632008	0.00674847	None	0	0	FALSE	FALSE		None
chr1	18525653	18527266	74470	M	None	0.018	0.0113	0.0089	None	0.0103	Other	1.59292	1.1573	Gm15386	0.011	0.0122	0.011	0.0087	0.009	0.0094	0.02	0.0147	0.0153	0.0085	0.0129	0.0122	0.00603021	0.00636885	0.00632008	0.00674847	None	0	3	FALSE	FALSE	mCerebrum-DS14024 mCerebrum-DS14024 mBrain-DS12727 ZhBTc4-DS17616	None
chr1	18643091	18643786	74477	M	None	0.0161	0.0102	0.0092	None	0.0106	Other	1.57843	1.15217	Gm15386	0.0126	0.0083	0.0063	0.0101	0.0095	0.0064	0.0161	0.0124	0.0204	0.0124	0.0086	0.0086	0.00603021	0.00636885	0.00632008	0.00674847	None	0	0	FALSE	FALSE		None
chr1	18679716	18680262	74480	M	None	0.0173	0.0089	0.0098	None	0.0092	Other	1.94382	0.938776	Tfap2d	0.0064	0.0121	0.0113	0.0079	0.014	0.0116	0.019	0.0155	0.0145	0.0098	0.0071	0.0103	0.00603021	0.00636885	0.00632008	0.00674847	None	0	0	FALSE	FALSE		None
chr1	18825237	18825869	74490	M	None	0.0168	0.0093	0.0112	None	0.0096	Other	1.80645	0.857143	Tfap2d	0.0094	0.0071	0.0114	0.0114	0.0104	0.0112	0.0142	0.0182	0.0235	0.0085	0.0106	0.0114	0.00603021	0.00636885	0.00632008	0.00674847	None	0	0	FALSE	FALSE		None
chr1	19084266	19084559	74500	M	None	0.0194	0.0134	0.0141	None	0.0123	Other	1.44776	0.87234	Tfap2d	0.0118	0.0205	0.0091	0.0142	0.0134	0.0142	0.0222	0.0206	0.0091	0.0118	0.0136	0.012	0.00603021	0.00636885	0.00632008	0.00674847	None	0	0	FALSE	FALSE		None
chr1	19085046	19087437	74501	IM	IM	0.0221	0.0183	0.013	None	0.0177	Other	1.20765	1.36154	Tfap2d	0.0182	0.0195	0.0171	0.0116	0.0156	0.015	0.0223	0.022	0.0214	0.016	0.0219	0.0172	0.00603021	0.00636885	0.00632008	0.00674847	cUMR	2792	1	FALSE	FALSE	ZhBTc4-DS17562	None
chr1	19088027	19089114	74502	IM	M	0.0234	0.0166	0.011	None	0.0166	Other	1.40964	1.50909	Tfap2d	0.0163	0.0167	0.0172	0.01	0.0105	0.0145	0.024	0.024	0.021	0.0168	0.0174	0.0153	0.00603021	0.00636885	0.00632008	0.00674847	cUMR	2792	1	FALSE	FALSE	mMesoderm-DS18198	None
chr1	19089481	19091720	74503	M	M	0.0218	0.0156	0.0109	None	0.0153	Other	1.39744	1.40367	Tfap2d	0.0119	0.0203	0.0193	0.0113	0.0078	0.0125	0.0241	0.02	0.0169	0.0137	0.0156	0.0189	0.00603021	0.00636885	0.00632008	0.00674847	Canyon	13002	1	FALSE	FALSE	mRetina-DS20000	None
chr1	19091748	19092315	74504	M	None	0.0187	0.0139	0.0096	None	0.0095	Other	1.34532	0.989583	Tfap2d	0.0114	0.0216	0.0111	0.0106	0.0069	0.009	0.0224	0.0108	0.0164	0.0086	0.0094	0.0119	0.00603021	0.00636885	0.00632008	0.00674847	Canyon	13002	0	FALSE	FALSE		None
chr1	19092342	19095226	74505	IM	M	0.02	0.0207	0.0126	None	0.0178	AllTSS2	0.966184	1.4127	Tfap2d	0.0232	0.0177	0.0178	0.0134	0.0108	0.012	0.0212	0.0196	0.0169	0.0159	0.0236	0.0165	0.00603021	0.00636885	0.00632008	0.00674847	Canyon	13002	7	FALSE	TRUE	mMesoderm-DS18198 mfBrain-DS14536 mCD1-DS17129 mESC_FIKO-DS17063 mCJ7-DS13320 mESC_FIKO-DS17063 mCJ7-DS13320 mForelimbBuds-DS18275 mESC_F4WT-DS17060	None
chr1	19095617	19096679	74506	M	M	0.0226	0.0173	0.0124	None	0.0153	Other	1.30636	1.23387	Tfap2d	0.0154	0.0219	0.017	0.0135	0.0086	0.0125	0.0253	0.0188	0.0187	0.0107	0.0214	0.0203	0.00603021	0.00636885	0.00632008	0.00674847	Canyon	13002	2	FALSE	TRUE	mMesoderm-DS18198 mfBrain-DS14536	None
chr1	19097769	19098521	74507	IM	None	0.0216	0.0171	0.0125	None	0.0176	Other	1.26316	1.408	Tfap2d	0.0147	0.0228	0.0164	0.0137	0.008	0.013	0.0251	0.0215	0.0107	0.016	0.0209	0.0181	0.00603021	0.00636885	0.00632008	0.00674847	Canyon	13002	1	FALSE	TRUE	mfBrain-DS14536	None
chr1	19098550	19098853	74508	I	None	0.0172	0.0171	0.0124	None	0.0145	Other	1.00585	1.16935	Tfap2d	0.013	0.023	0.0206	0.0131	0.0157	0.0078	0.0209	0.0123	0.0117	0.0131	0.0166	0.0158	0.00603021	0.00636885	0.00632008	0.00674847	Canyon	13002	1	FALSE	TRUE	mfBrain-DS14536	None
chr1	19099649	19101708	74509	IM	M	0.018	0.0181	0.0118	None	0.0172	Other	0.994475	1.45763	Tfap2d	0.0185	0.0184	0.0167	0.0121	0.0114	0.0114	0.0171	0.0208	0.0175	0.0159	0.0203	0.0168	0.00603021	0.00636885	0.00632008	0.00674847	Canyon	13002	4	FALSE	TRUE	mPATSKI-DS15697 mCD1-DS17129 mESC_FIKO-DS17063 mfBrain-DS14536	None
chr1	19168137	19168491	74511	M	None	0.021	0.0144	0.0144	None	0.0167	Other	1.45833	1.15972	Tfap2d	0.0148	0.0105	0.0179	0.0127	0.0157	0.018	0.0215	0.016	0.0254	0.0171	0.0165	0.0159	0.00603021	0.00636885	0.00632008	0.00674847	None	0	0	FALSE	FALSE		None
chr1	19168923	19169658	74512	I	I	0.0149	0.0138	0.0207	None	0.0129	Other	1.07971	0.623188	Tfap2d	0.0128	0.0147	0.0152	0.0222	0.0197	0.0174	0.0138	0.0146	0.0188	0.01	0.0171	0.0155	0.00603021	0.00636885	0.00632008	0.00674847	None	0	1	FALSE	FALSE	mMesoderm-DS18198	None
chr1	19189719	19190333	74513	M	M	0.0222	0.0161	0.0149	None	0.0192	Other	1.37888	1.28859	Tfap2d	0.0169	0.0127	0.0178	0.0146	0.014	0.0165	0.0253	0.0172	0.0182	0.0221	0.0158	0.0156	0.00603021	0.00636885	0.00632008	0.00674847	None	0	0	FALSE	FALSE		None
chr1	19195567	19196260	74514	IM	I	0.0184	0.0154	0.0244	None	0.0132	Other	1.19481	0.540984	Tfap2d	0.0113	0.0184	0.0222	0.0244	0.0222	0.0263	0.0201	0.0134	0.0187	0.012	0.0109	0.0184	0.00603021	0.00636885	0.00632008	0.00674847	cUMR	1938	3	FALSE	FALSE	mHindlimbsBuds-DS18279 mPATSKI-DS15697 mGenitalFatPad-DS18780	None
chr1	19196719	19202982	74515	IM	M	0.0283	0.0236	0.0111	None	0.0196	AllTSS2	1.19915	1.76577	Tfap2b	0.0268	0.0218	0.0175	0.0116	0.0082	0.0121	0.0316	0.0258	0.0207	0.0154	0.0255	0.0237	0.00603021	0.00636885	0.00632008	0.00674847	cUMR	1938	8	FALSE	TRUE	mGenitalFatPad-DS18780 mGenitalFatPad-DS18780 mGenitalFatPad-DS18780 mGenitalFatPad-DS18780 mGenitalFatPad-DS18780 mGenitalFatPad-DS18780 mGenitalFatPad-DS18780 mFatPad-DS14021 mMesoderm-DS18198 ZhBTc4-DS17562 mMesoderm-DS18198 mCJ7-DS13320 mCJ7-DS13320 mESC_FIKO-DS17063 mKidney-DS13948 mCJ7-DS13320 mKidney-DS13948 mESC_F4WT-DS17060 mCJ7-DS13320 mGenitalFatPad-DS18780	None
chr1	19206354	19206913	74518	None	M	0.014	0.0162	0.0089	None	0.0225	Other	0.864198	2.52809	Tfap2b	0.0178	0.0119	0.0171	0.0089	0.01	0.0077	0.0174	0.0082	0.0104	0.0275	0.0175	0.0155	0.00603021	0.00636885	0.00632008	0.00674847	Canyon	11810	1	FALSE	TRUE	mFatPad-DS14021	None
chr1	19207891	19208422	74519	M	None	0.0175	0.0113	0.0107	None	0.0131	Other	1.54867	1.2243	Tfap2b	0.0122	0.0123	0.0081	0.011	0.0142	0.0069	0.0157	0.0206	0.0196	0.0118	0.0111	0.0183	0.00603021	0.00636885	0.00632008	0.00674847	Canyon	11810	1	FALSE	TRUE	mCJ7-DS13320	None
chr1	19224747	19225327	74521	I	None	0.0128	0.0184	0.0084	None	0.0166	Other	0.695652	1.97619	Tfap2b	0.0216	0.0119	0.0179	0.0072	0.0044	0.0153	0.0151	0.014	0.0041	0.0171	0.0164	0.0157	0.00603021	0.00636885	0.00632008	0.00674847	Canyon	4685	2	FALSE	TRUE	mfBrain-DS14536 mCJ7-DS13320	None
chr1	19226235	19227478	74522	I	M	0.017	0.0205	0.0137	None	0.0191	Other	0.829268	1.39416	Tfap2b	0.0208	0.0207	0.0197	0.0139	0.0125	0.014	0.0166	0.0199	0.0149	0.0199	0.0202	0.0161	0.00603021	0.00636885	0.00632008	0.00674847	Canyon	4685	3	FALSE	TRUE	mfBrain-DS14536 mRetina-DS20000 ZhBTc4-DS17562	None
chr1	19228228	19228610	74523	M	None	0.0192	0.0179	0.0108	None	0.0148	Other	1.07263	1.37037	Tfap2b	0.0171	0.0205	0.017	0.0103	0.012	0.0115	0.0196	0.0223	0.0145	0.01	0.0181	0.023	0.00603021	0.00636885	0.00632008	0.00674847	Canyon	4685	0	FALSE	TRUE		None
chr1	19259090	19259563	74525	M	None	0.0194	0.0109	0.0125	None	0.0166	Other	1.77982	1.328	Tfap2d	0.0082	0.015	0.0128	0.0118	0.0105	0.0162	0.024	0.0141	0.0112	0.0144	0.0137	0.025	0.00603021	0.00636885	0.00632008	0.00674847	None	0	0	FALSE	FALSE		None
chr1	19259717	19260620	74526	M	M	0.0208	0.0139	0.0152	None	0.0181	Other	1.4964	1.19079	Tfap2d	0.0111	0.0187	0.0154	0.0153	0.0102	0.0191	0.0213	0.0211	0.0188	0.0163	0.0223	0.0179	0.00603021	0.00636885	0.00632008	0.00674847	None	0	1	FALSE	FALSE	mGenitalFatPad-DS18780	None
chr1	19320987	19322535	74527	M	None	0.0149	0.0134	0.0137	None	0.0161	Other	1.11194	1.17518	Tfap2d	0.0129	0.0134	0.0145	0.0131	0.0143	0.0149	0.0149	0.0141	0.0157	0.017	0.0151	0.0147	0.00603021	0.00636885	0.00632008	0.00674847	None	0	0	FALSE	FALSE		None
chr1	19322597	19323516	74528	IM	None	0.017	0.0168	0.0121	None	0.0155	Other	1.0119	1.28099	Tfap2d	0.0187	0.0136	0.0155	0.012	0.0141	0.0108	0.0165	0.0178	0.0175	0.0138	0.0146	0.0207	0.00603021	0.00636885	0.00632008	0.00674847	None	0	0	FALSE	FALSE		None
chr1	19360564	19361685	74531	M	None	0.0182	0.0109	0.0092	None	0.0108	Other	1.66972	1.17391	Tfap2d	0.0093	0.015	0.01	0.01	0.008	0.0082	0.0197	0.0179	0.0139	0.0104	0.0123	0.0105	0.00603021	0.00636885	0.00632008	0.00674847	None	0	0	FALSE	FALSE		None
chr1	19377899	19378753	74532	M	None	0.0189	0.0135	0.0097	None	0.0143	Other	1.4	1.47423	Tfap2d	0.0128	0.0149	0.0138	0.0074	0.0146	0.0118	0.0193	0.0141	0.023	0.0146	0.015	0.0125	0.00603021	0.00636885	0.00632008	0.00674847	None	0	0	FALSE	FALSE		None
chr1	19669809	19670443	74544	M	None	0.0216	0.0099	0.0073	None	0.009	Other	2.18182	1.23288	Tfap2d	0.0042	0.0184	0.0143	0.0062	0.0058	0.0117	0.0147	0.0161	0.05	0.0075	0.0117	0.0101	0.00603021	0.00636885	0.00632008	0.00674847	None	0	0	FALSE	FALSE		None
chr1	19719188	19719612	74549	M	None	0.0174	0.0115	0.0103	None	0.0125	Other	1.51304	1.21359	Tfap2d	0.0084	0.0154	0.0149	0.0119	0.0055	0.0098	0.0144	0.0164	0.0282	0.0134	0.0124	0.0104	0.00603021	0.00636885	0.00632008	0.00674847	None	0	0	FALSE	FALSE		None
chr1	19842775	19843203	74557	M	None	0.0172	0.0077	0.0124	None	0.0136	Other	2.23377	1.09677	4930486I03Rik	0.0071	0.0069	0.01	0.0106	0.0104	0.0193	0.0178	0.0124	0.0213	0.0099	0.0158	0.0203	0.00603021	0.00636885	0.00632008	0.00674847	None	0	1	FALSE	FALSE	mIntestine_Large-DS19140	None
chr1	19877481	19878006	74561	M	None	0.0181	0.0107	0.0113	None	0.0118	Other	1.69159	1.04425	4930486I03Rik	0.0106	0.0103	0.0115	0.01	0.0116	0.0148	0.0205	0.014	0.0152	0.0113	0.0114	0.0137	0.00603021	0.00636885	0.00632008	0.00674847	None	0	0	FALSE	FALSE		None
chr1	19960675	19961303	74570	M	None	0.0173	0.0117	0.0112	None	0.0128	Other	1.47863	1.14286	4930486I03Rik	0.0116	0.0114	0.0122	0.011	0.0107	0.0122	0.0192	0.0138	0.0154	0.0128	0.0081	0.0174	0.00603021	0.00636885	0.00632008	0.00674847	None	0	0	FALSE	FALSE		None
chr1	19976213	19976824	74571	None	I	0.0064	0.0076	0.0254	None	0.0111	Other	0.842105	0.437008	4930486I03Rik	0.0077	0.0085	0.0061	0.0088	0.067	0.0374	0.0059	0.0051	0.0094	0.0136	0.0066	0.0097	0.00603021	0.00636885	0.00632008	0.00674847	None	0	1	FALSE	FALSE	mCJ7-DS13320	None
chr1	20009585	20010067	74573	M	None	0.0175	0.0085	0.0147	None	0.015	Other	2.05882	1.02041	4930486I03Rik	0.0075	0.0089	0.0105	0.0097	0.0239	0.0208	0.0199	0.0124	0.0161	0.0151	0.0156	0.0142	0.00603021	0.00636885	0.00632008	0.00674847	None	0	0	FALSE	FALSE		None
chr1	20096874	20097413	74577	M	None	0.0171	0.0106	0.0116	None	0.0094	Other	1.61321	0.810345	Pkhd1	0.0113	0.0092	0.0104	0.0112	0.0096	0.0146	0.0165	0.0175	0.0188	0.0092	0.0062	0.0133	0.00603021	0.00636885	0.00632008	0.00674847	None	0	1	FALSE	FALSE	mMesoderm-DS18198	None
chr1	20097421	20098124	74578	M	None	0.0185	0.0111	0.0119	None	0.0129	Other	1.66667	1.08403	Pkhd1	0.0103	0.0127	0.0114	0.0093	0.0135	0.0181	0.02	0.0155	0.0172	0.0109	0.014	0.0165	0.00603021	0.00636885	0.00632008	0.00674847	None	0	0	FALSE	FALSE		None
chr1	20127932	20128562	74581	M	None	0.0172	0.012	0.0106	None	0.0151	Other	1.43333	1.42453	Pkhd1	0.0122	0.0118	0.0115	0.0114	0.0072	0.0111	0.0164	0.0159	0.0209	0.0154	0.0147	0.0151	0.00603021	0.00636885	0.00632008	0.00674847	None	0	0	FALSE	FALSE		None
chr1	20128925	20129772	74582	M	M	0.0176	0.0142	0.0131	None	0.0159	Other	1.23944	1.21374	Pkhd1	0.0123	0.0162	0.0166	0.0113	0.0139	0.0178	0.0166	0.0178	0.0203	0.0162	0.0137	0.0173	0.00603021	0.00636885	0.00632008	0.00674847	None	0	2	FALSE	FALSE	mForelimbBuds-DS18275 mPATSKI-DS15697	None
chr1	20132581	20132949	74584	M	None	0.0177	0.0129	0.0121	None	0.013	Other	1.37209	1.07438	Pkhd1	0.0123	0.0146	0.0123	0.0095	0.02	0.0127	0.0184	0.0141	0.02	0.0115	0.0145	0.0151	0.00603021	0.00636885	0.00632008	0.00674847	None	0	0	FALSE	FALSE		None
chr1	20133361	20133679	74585	M	None	0.0187	0.013	0.0149	None	0.0187	Other	1.43846	1.25503	Pkhd1	0.0104	0.012	0.021	0.0128	0.019	0.0174	0.0198	0.0166	0.0175	0.0186	0.0157	0.0218	0.00603021	0.00636885	0.00632008	0.00674847	None	0	1	FALSE	FALSE	mHindlimbsBuds-DS18279	None
chr1	20212669	20215092	74587	IM	M	0.0209	0.0157	0.0112	None	0.0131	Other	1.33121	1.16964	Pkhd1	0.0165	0.0164	0.013	0.0112	0.0122	0.0101	0.0225	0.0179	0.0195	0.013	0.0125	0.014	0.00603021	0.00636885	0.00632008	0.00674847	None	0	1	FALSE	FALSE	mRetina-DS19060	None
chr1	20301532	20302189	74591	None	I	0.0104	0.0096	0.0214	None	0.0089	Other	1.08333	0.415888	Pkhd1	0.0069	0.0132	0.0122	0.0218	0.0267	0.0158	0.0112	0.0098	0.0088	0.0082	0.01	0.0094	0.00603021	0.00636885	0.00632008	0.00674847	None	0	1	FALSE	FALSE	mMesoderm-DS18198	None
chr1	20313320	20313646	74592	M	None	0.02	0.012	0.0125	None	0.0169	Other	1.66667	1.352	Pkhd1	0.0079	0.0153	0.0189	0.014	0.0154	0.006	0.021	0.0165	0.0212	0.0155	0.0128	0.0247	0.00603021	0.00636885	0.00632008	0.00674847	None	0	0	FALSE	FALSE		None
chr1	20315971	20317185	74594	M	None	0.0194	0.012	0.0131	None	0.014	Other	1.61667	1.0687	Pkhd1	0.0104	0.0143	0.0132	0.0136	0.0111	0.0134	0.0192	0.016	0.0241	0.0122	0.0146	0.0181	0.00603021	0.00636885	0.00632008	0.00674847	None	0	1	FALSE	FALSE	mKidney-DS13948	None
chr1	20333591	20338328	74595	IM	M	0.0213	0.0172	0.0115	None	0.0174	Other	1.23837	1.51304	Pkhd1	0.0178	0.0168	0.0161	0.0121	0.0112	0.0099	0.0214	0.0193	0.0235	0.0156	0.0194	0.02	0.00603021	0.00636885	0.00632008	0.00674847	None	0	3	FALSE	FALSE	mMesoderm-DS18198 mRetina-DS20000 mFatPad-DS14021	None
chr1	20358563	20359641	74596	M	None	0.0208	0.0141	0.014	None	0.0139	Other	1.47518	0.992857	Pkhd1 4930486I03Rik	0.0148	0.0104	0.0167	0.0138	0.0115	0.0168	0.0216	0.0202	0.019	0.0113	0.0166	0.0174	0.00603021	0.00636885	0.00632008	0.00674847	None	0	1	FALSE	FALSE	mCerebrum-DS14024	None
chr1	20371299	20371573	74597	M	None	0.0192	0.0127	0.0122	None	0.0147	Other	1.51181	1.20492	Pkhd1 4930486I03Rik	0.0139	0.0133	0.009	0.0131	0.0113	0.0106	0.0206	0.0168	0.0175	0.0179	0.0128	0.0089	0.00603021	0.00636885	0.00632008	0.00674847	None	0	0	FALSE	FALSE		None
chr1	20420896	20422533	74599	IM	IM	0.0251	0.0195	0.0125	None	0.0148	Other	1.28718	1.184	Pkhd1	0.0188	0.0222	0.0181	0.0114	0.0136	0.0146	0.0266	0.0249	0.0206	0.0113	0.0193	0.0187	0.00603021	0.00636885	0.00632008	0.00674847	None	0	1	FALSE	FALSE	ZhBTc4-DS17616	None
chr1	20440085	20440340	74600	M	None	0.0173	0.0133	0.0107	None	0.0129	Other	1.30075	1.20561	Pkhd1	0.0146	0.0092	0.015	0.0096	0.0123	0.0125	0.0158	0.0151	0.0246	0.0117	0.0134	0.0153	0.00603021	0.00636885	0.00632008	0.00674847	None	0	1	FALSE	FALSE	mPATSKI-DS15697	None
chr1	20475964	20476636	74603	I	None	0.0138	0.0158	0.0093	None	0.01	Other	0.873418	1.07527	Pkhd1	0.0126	0.022	0.0168	0.0073	0.0149	0.0104	0.0142	0.0177	0.0079	0.0087	0.012	0.0112	0.00603021	0.00636885	0.00632008	0.00674847	None	0	1	FALSE	FALSE	ZhBTc4-DS17616	None
chr1	20487426	20487971	74604	M	None	0.0188	0.0139	0.0169	None	0.0144	Other	1.35252	0.852071	Pkhd1	0.0119	0.0153	0.0173	0.0161	0.0173	0.0187	0.0191	0.0161	0.0212	0.0156	0.0131	0.0128	0.00603021	0.00636885	0.00632008	0.00674847	None	0	1	FALSE	FALSE	CH12-DS22542	None
chr1	20497649	20498206	74605	M	None	0.0204	0.0158	0.0145	None	0.0158	Other	1.29114	1.08966	Pkhd1	0.0174	0.012	0.016	0.0159	0.0143	0.0107	0.0202	0.0179	0.024	0.0159	0.0153	0.016	0.00603021	0.00636885	0.00632008	0.00674847	None	0	1	FALSE	FALSE	mKidney-DS13948	None
chr1	20503640	20504385	74606	IM	I	0.0147	0.0194	0.0252	None	0.0104	Other	0.757732	0.412698	Pkhd1	0.0171	0.0198	0.025	0.0249	0.0267	0.0248	0.011	0.0183	0.0222	0.0097	0.0098	0.0127	0.00603021	0.00636885	0.00632008	0.00674847	None	0	2	FALSE	FALSE	mThymus-DS18819 mPATSKI-DS15697	None
chr1	20544408	20544912	74607	None	I	0.0068	0.0149	0.0239	None	0.0112	Other	0.456376	0.468619	Pkhd1	0.0148	0.0146	0.0155	0.0251	0.0272	0.0179	0.0048	0.0095	0.0099	0.0118	0.0119	0.009	0.00603021	0.00636885	0.00632008	0.00674847	None	0	1	FALSE	FALSE	mPATSKI-DS15697	None
chr1	20555529	20555921	74608	M	None	0.0191	0.0152	0.0127	None	0.019	Other	1.25658	1.49606	Pkhd1	0.0139	0.0146	0.0192	0.0121	0.0187	0.0095	0.0181	0.0161	0.026	0.0157	0.0233	0.0229	0.00603021	0.00636885	0.00632008	0.00674847	None	0	0	FALSE	FALSE		None
chr1	20557372	20558373	74609	M	None	0.0205	0.0115	0.0123	None	0.0157	Other	1.78261	1.27642	Pkhd1	0.0113	0.0111	0.0123	0.0107	0.0172	0.0128	0.0215	0.0127	0.0267	0.0133	0.0142	0.0233	0.00603021	0.00636885	0.00632008	0.00674847	None	0	0	FALSE	FALSE		None
chr1	20559074	20559596	74610	IM	None	0.0182	0.0182	0.0146	None	0.0165	Other	1	1.13014	Pkhd1	0.0149	0.0238	0.02	0.0127	0.0169	0.0181	0.0189	0.0165	0.0182	0.0156	0.0194	0.0155	0.00603021	0.00636885	0.00632008	0.00674847	None	0	2	FALSE	FALSE	mRetina-DS19060 mRetina-DS20000	None
chr1	20561936	20562800	74611	M	M	0.0198	0.0173	0.0133	None	0.0213	Other	1.14451	1.6015	Pkhd1	0.0191	0.0138	0.0169	0.0135	0.0146	0.0115	0.0193	0.018	0.0235	0.023	0.0218	0.0164	0.00603021	0.00636885	0.00632008	0.00674847	None	0	0	FALSE	FALSE		None
chr1	20573735	20574221	74612	M	None	0.0202	0.0104	0.0101	None	0.0125	Other	1.94231	1.23762	Pkhd1	0.0084	0.0175	0.0074	0.0126	0.0066	0.0063	0.0235	0.0175	0.013	0.0096	0.0135	0.0186	0.00603021	0.00636885	0.00632008	0.00674847	None	0	0	FALSE	FALSE		None
chr1	20574681	20575395	74613	M	None	0.0212	0.012	0.0135	None	0.0125	Other	1.76667	0.925926	Pkhd1	0.0098	0.014	0.0153	0.011	0.0176	0.0171	0.0238	0.0152	0.02	0.0136	0.0111	0.0114	0.00603021	0.00636885	0.00632008	0.00674847	None	0	0	FALSE	FALSE		None
chr1	20577577	20577854	74614	M	None	0.019	0.0086	0.0136	None	0.0117	Other	2.2093	0.860294	Pkhd1	0.0056	0.0086	0.0163	0.0143	0.0142	0.0112	0.0211	0.0179	0.0136	0.009	0.0116	0.0184	0.00603021	0.00636885	0.00632008	0.00674847	None	0	0	FALSE	FALSE		None
chr1	20595205	20595970	74616	IM	M	0.0181	0.0169	0.0139	None	0.0201	Other	1.07101	1.44604	Pkhd1	0.0159	0.0182	0.018	0.0124	0.0165	0.0158	0.0183	0.0189	0.0166	0.0204	0.0188	0.0207	0.00603021	0.00636885	0.00632008	0.00674847	None	0	1	FALSE	FALSE	mPATSKI-DS15697	None
chr1	20602720	20603256	74617	I	I	0.01	0.0172	0.0216	None	0.0098	Other	0.581395	0.453704	Pkhd1	0.0172	0.0177	0.0165	0.0206	0.0213	0.0249	0.0074	0.0156	0.0115	0.0106	0.0113	0.006	0.00603021	0.00636885	0.00632008	0.00674847	None	0	1	FALSE	FALSE	mPATSKI-DS15697	None
chr1	20648137	20648587	74618	I	None	0.018	0.0188	0.0136	None	0.0168	Other	0.957447	1.23529	Mir206	0.0169	0.0194	0.023	0.0125	0.0132	0.0168	0.0163	0.015	0.027	0.0181	0.0157	0.0146	0.00603021	0.00636885	0.00632008	0.00674847	None	0	0	FALSE	FALSE		None
chr1	20675581	20676236	74620	IM	M	0.0219	0.0191	0.0177	None	0.024	Other	1.1466	1.35593	Mir133b	0.0192	0.019	0.0187	0.0167	0.0194	0.0189	0.0215	0.0182	0.0272	0.0251	0.0235	0.0217	0.00603021	0.00636885	0.00632008	0.00674847	None	0	1	FALSE	FALSE	mPATSKI-DS15697 mPATSKI-DS15697	None
chr1	20677569	20677830	74621	M	None	0.0195	0.0151	0.0129	None	0.0197	Other	1.29139	1.52713	Mir133b	0.0148	0.0172	0.0134	0.0136	0.0148	0.0093	0.0185	0.0163	0.0265	0.0218	0.013	0.0215	0.00603021	0.00636885	0.00632008	0.00674847	None	0	0	FALSE	FALSE		None
chr1	20722357	20722650	74625	M	None	0.0201	0.0135	0.0107	None	0.0179	Other	1.48889	1.6729	Il17a	0.0104	0.0166	0.0178	0.0113	0.0149	0.0057	0.0171	0.0258	0.0228	0.0184	0.0132	0.0214	0.00603021	0.00636885	0.00632008	0.00674847	None	0	0	FALSE	FALSE		None
chr1	20771918	20772244	74626	M	None	0.0201	0.0145	0.0159	None	0.0133	Other	1.38621	0.836478	Il17f	0.0122	0.0179	0.0164	0.0172	0.0141	0.0139	0.0201	0.0238	0.0156	0.0137	0.014	0.0118	0.00603021	0.00636885	0.00632008	0.00674847	None	0	0	FALSE	FALSE		None
chr1	20782544	20783331	74627	M	M	0.0242	0.018	0.0166	None	0.0207	Other	1.34444	1.24699	Mcm3	0.0161	0.0233	0.0164	0.0171	0.0151	0.0165	0.0225	0.0254	0.028	0.0217	0.0197	0.0194	0.00603021	0.00636885	0.00632008	0.00674847	None	0	0	FALSE	FALSE		None
chr1	20784811	20786053	74628	IM	I	0.0224	0.0205	0.0219	None	0.0193	Enhancer4	1.09268	0.881279	Mcm3	0.0178	0.0209	0.0266	0.0223	0.0179	0.0241	0.0201	0.0285	0.0225	0.0186	0.0191	0.0212	0.00603021	0.00636885	0.00632008	0.00674847	None	0	3	FALSE	FALSE	mGenitalFatPad-DS18780 mfLiver_F5-DS20999 mfLiver_F5-DS20999 mFatPad-DS14021	None
chr1	20786455	20786812	74629	M	None	0.0204	0.0168	0.017	None	0.019	Enhancer4	1.21429	1.11765	Mcm3	0.0177	0.0131	0.0188	0.018	0.0159	0.0151	0.0165	0.0203	0.0326	0.0173	0.0254	0.0167	0.00603021	0.00636885	0.00632008	0.00674847	None	0	1	FALSE	FALSE	MEL-DS13036	None
chr1	20787209	20788195	74630	IM	IM	0.0232	0.0184	0.0275	None	0.0225	Other	1.26087	0.818182	Mcm3	0.0182	0.0187	0.0184	0.0272	0.0201	0.0345	0.0229	0.0275	0.0189	0.022	0.0214	0.0249	0.00603021	0.00636885	0.00632008	0.00674847	None	0	3	FALSE	FALSE	mCerebrum-DS14024 CH12-DS22542 mA20-DS16695	None
chr1	20790604	20790855	74631	None	I	0.0183	0.0176	0.0241	None	0.0172	Other	1.03977	0.713693	Mcm3	0.0145	0.0197	0.0229	0.0251	0.0259	0.02	0.0192	0.0141	0.0201	0.0153	0.0219	0.0167	0.00603021	0.00636885	0.00632008	0.00674847	None	0	0	FALSE	FALSE		None
chr1	20790898	20791410	74632	None	I	0.0184	0.0178	0.0207	None	0.0165	Other	1.03371	0.797101	Mcm3	0.0203	0.0171	0.0122	0.0198	0.0195	0.0241	0.0194	0.02	0.0133	0.015	0.018	0.0185	0.00603021	0.00636885	0.00632008	0.00674847	None	0	1	FALSE	FALSE	ZhBTc4-DS17562	None
chr1	20791745	20792293	74633	None	I	0.0154	0.0196	0.0253	None	0.0132	Enhancer4	0.785714	0.521739	Mcm3	0.0166	0.0243	0.0218	0.0288	0.0199	0.0202	0.0143	0.0193	0.0143	0.0073	0.0195	0.0213	0.00603021	0.00636885	0.00632008	0.00674847	None	0	1	FALSE	FALSE	mfBrain-DS14536	None
chr1	20794930	20795351	74634	I	None	0.0188	0.0223	0.0188	None	0.0239	Other	0.843049	1.27128	Mcm3	0.0254	0.019	0.018	0.0171	0.0129	0.0285	0.0174	0.0245	0.0163	0.0219	0.0263	0.0262	0.00603021	0.00636885	0.00632008	0.00674847	None	0	1	FALSE	FALSE	mESC_FIKO-DS17063	None
chr1	20796699	20797936	74635	I	None	0.0136	0.0223	0.0177	None	0.0195	Enhancer4	0.609865	1.10169	Mcm3	0.0249	0.017	0.022	0.0172	0.0202	0.0168	0.0122	0.0191	0.0115	0.0181	0.0216	0.0205	0.00603021	0.00636885	0.00632008	0.00674847	None	0	2	FALSE	FALSE	ZhBTc4-DS15236 mfLiver_F2-DS20994	None
chr1	20807206	20807457	74637	None	I	0.0144	0.0122	0.0217	None	0.0116	Enhancer4	1.18033	0.534562	Mcm3	0.0131	0.0154	0.0063	0.0247	0.0127	0.0206	0.0163	0.0134	0.0096	0.0158	0.0092	0.0038	0.00603021	0.00636885	0.00632008	0.00674847	None	0	1	FALSE	FALSE	mfLiver-DS19246	None
chr1	20808690	20809065	74638	None	I	0.0107	0.0104	0.0247	None	0.0166	Enhancer4	1.02885	0.672065	Mcm3	0.0088	0.0111	0.0137	0.0275	0.0177	0.023	0.0103	0.01	0.013	0.0169	0.0128	0.02	0.00603021	0.00636885	0.00632008	0.00674847	cUMR	1777	2	FALSE	FALSE	mfLiver_F1-DS20991 mGER-DS15420	None
chr1	20809830	20811021	74639	IM	IM	0.0414	0.0711	0.0769	None	0.0456	AllTSS2	0.582278	0.592978	Mcm3	0.0614	0.0822	0.0829	0.0792	0.0581	0.0861	0.0379	0.0498	0.0427	0.0333	0.0628	0.0578	0.00603021	0.00636885	0.00632008	0.00674847	cUMR	1777	3	FALSE	FALSE	mfLiver_F5-DS20999 mfLiver_F2-DS20994 mPATSKI-DS15697	None
chr1	20814715	20814976	74640	M	None	0.0217	0.0157	0.0133	None	0.0159	Other	1.38217	1.19549	Mcm3	0.0154	0.0157	0.0166	0.0141	0.0144	0.0099	0.022	0.0255	0.0162	0.0144	0.02	0.0153	0.00603021	0.00636885	0.00632008	0.00674847	None	0	0	FALSE	FALSE		None
chr1	20820728	20821153	74641	M	None	0.0202	0.017	0.0165	None	0.0178	Other	1.18824	1.07879	Mcm3	0.0174	0.0108	0.0234	0.0151	0.0182	0.0191	0.0205	0.0148	0.0255	0.0158	0.0159	0.0246	0.00603021	0.00636885	0.00632008	0.00674847	None	0	1	FALSE	FALSE	mGER-DS15420	None
chr1	20825451	20826236	74642	IM	M	0.0247	0.0198	0.0158	None	0.0216	Other	1.24747	1.36709	Mcm3	0.0215	0.0157	0.0203	0.0164	0.012	0.0172	0.0238	0.0234	0.0291	0.0234	0.0224	0.0164	0.00603021	0.00636885	0.00632008	0.00674847	None	0	1	FALSE	FALSE	mLung-DS14479	None
chr1	20859606	20860034	74643	M	None	0.0192	0.0158	0.0137	None	0.0196	Other	1.21519	1.43066	6720483E21Rik	0.0177	0.0131	0.0141	0.0146	0.0149	0.0104	0.0187	0.0225	0.017	0.0178	0.0221	0.0217	0.00603021	0.00636885	0.00632008	0.00674847	None	0	0	FALSE	FALSE		None
chr1	20873467	20873718	74644	M	None	0.0218	0.0149	0.0115	None	0.0141	Other	1.46309	1.22609	6720483E21Rik	0.013	0.0201	0.0135	0.0108	0.0078	0.0167	0.0239	0.018	0.02	0.0143	0.0159	0.0116	0.00603021	0.00636885	0.00632008	0.00674847	None	0	2	FALSE	FALSE	mFibroblast-DS10088 mHeart-DS17909	None
chr1	20880459	20880880	74645	None	M	0.0141	0.0189	0.0124	None	0.0263	AllTSS2	0.746032	2.12097	6720483E21Rik Paqr8	0.0254	0.0098	0.0128	0.0128	0.0091	0.014	0.0153	0.0133	0.0115	0.0296	0.0278	0.0162	0.00603021	0.00636885	0.00632008	0.00674847	cUMR	1678	2	TRUE	FALSE	mBrain-DS12727 m416B-DS14099	None
chr1	20896511	20896762	74646	M	None	0.0195	0.0203	0.0138	None	0.0177	Other	0.960591	1.28261	Paqr8	0.0204	0.0202	0.0201	0.0127	0.0163	0.0147	0.0177	0.0239	0.0202	0.0169	0.02	0.0173	0.00603021	0.00636885	0.00632008	0.00674847	None	0	1	TRUE	FALSE	mCerebrum-DS14024	None
chr1	20910345	20910599	74647	I	None	0.0205	0.0226	0.0179	None	0.0251	Other	0.90708	1.40223	Paqr8	0.0203	0.029	0.0213	0.0164	0.0167	0.0233	0.0171	0.0273	0.0231	0.0256	0.0205	0.0285	0.00603021	0.00636885	0.00632008	0.00674847	None	0	1	TRUE	FALSE	mfLiver_DLCR-DS19241	None
chr1	20911090	20911649	74648	IM	None	0.0214	0.0196	0.0196	None	0.0239	Other	1.09184	1.21939	Paqr8	0.0217	0.0193	0.0146	0.0217	0.0153	0.0173	0.0219	0.0197	0.022	0.0262	0.0199	0.0222	0.00603021	0.00636885	0.00632008	0.00674847	None	0	2	TRUE	FALSE	mBrain-DS12727 mCerebrum-DS14024	None
chr1	20914123	20914534	74649	M	None	0.0194	0.0178	0.0181	None	0.0171	Enhancer4	1.08989	0.944751	Paqr8	0.0161	0.0241	0.0147	0.0205	0.0111	0.0172	0.0196	0.0209	0.0168	0.0158	0.018	0.0192	0.00603021	0.00636885	0.00632008	0.00674847	None	0	0	TRUE	FALSE		None
chr1	20915819	20916498	74650	None	I	0.0114	0.0111	0.0283	None	0.0113	Enhancer4	1.02703	0.399293	Paqr8	0.0089	0.0156	0.0113	0.0341	0.0232	0.0165	0.0091	0.015	0.0141	0.0086	0.0125	0.017	0.00603021	0.00636885	0.00632008	0.00674847	None	0	1	TRUE	FALSE	MEL-DS13036	None
chr1	20918236	20919616	74651	None	I	0.0126	0.0123	0.0361	None	0.0142	Enhancer4	1.02439	0.393352	Paqr8	0.0112	0.0141	0.0131	0.0427	0.0243	0.0277	0.012	0.0121	0.0155	0.012	0.0148	0.019	0.00603021	0.00636885	0.00632008	0.00674847	None	0	2	TRUE	FALSE	m416B-DS14099 mGER-DS15420	None
chr1	20920751	20921176	74652	None	I	0.0133	0.0111	0.0238	None	0.0154	Enhancer4	1.1982	0.647059	Paqr8	0.0106	0.0134	0.0099	0.0248	0.0194	0.0245	0.0105	0.0089	0.0274	0.0149	0.0156	0.0163	0.00603021	0.00636885	0.00632008	0.00674847	None	0	1	TRUE	FALSE	mGER-DS15400	None
chr1	20923335	20924178	74653	None	I	0.0126	0.0147	0.0377	None	0.0129	Enhancer4	0.857143	0.342175	Paqr8	0.018	0.0125	0.009	0.0496	0.0221	0.0173	0.0112	0.0166	0.0126	0.0108	0.0132	0.0179	0.00603021	0.00636885	0.00632008	0.00674847	None	0	1	TRUE	FALSE	mPATSKI-DS15697	None
chr1	20924464	20925851	74654	IM	M	0.022	0.0245	0.017	None	0.025	Enhancer4	0.897959	1.47059	Paqr8	0.0289	0.0187	0.0198	0.0185	0.0151	0.0141	0.0224	0.0219	0.0207	0.0247	0.0278	0.0229	0.00603021	0.00636885	0.00632008	0.00674847	None	0	3	TRUE	FALSE	mCJ7-DS13320 E14-DS21450 MEL-DS13036 mCJ7-DS13320	None
chr1	20926369	20927516	74655	IM	IM	0.0251	0.0198	0.0229	None	0.0218	Other	1.26768	0.951965	Paqr8	0.0209	0.0196	0.0173	0.0285	0.014	0.0146	0.0246	0.0278	0.0231	0.0221	0.0268	0.0161	0.00603021	0.00636885	0.00632008	0.00674847	None	0	1	TRUE	FALSE	mfLiver_F1-DS20991	None
chr1	20929023	20929649	74656	I	I	0.0159	0.0252	0.0302	None	0.0171	Enhancer4	0.630952	0.566225	6720483E21Rik	0.0191	0.0398	0.0238	0.0384	0.0194	0.0165	0.0171	0.0157	0.0124	0.0106	0.026	0.0239	0.00603021	0.00636885	0.00632008	0.00674847	None	0	1	FALSE	FALSE	mPATSKI-DS15697	None
chr1	20996990	20997248	74657	M	None	0.0226	0.0255	0.0237	None	0.0294	Other	0.886275	1.24051	Tram2	0.0234	0.0293	0.0266	0.0236	0.0268	0.0214	0.0208	0.0287	0.021	0.0317	0.0316	0.0214	0.00603021	0.00636885	0.00632008	0.00674847	None	0	1	FALSE	FALSE	mMuscle_Skeletal-DS18130	None
chr1	20998721	20999387	74658	None	I	0.0169	0.0159	0.0356	None	0.0222	Other	1.06289	0.623596	Tram2	0.016	0.0141	0.018	0.0488	0.014	0.0168	0.0178	0.0138	0.018	0.0243	0.0212	0.0182	0.00603021	0.00636885	0.00632008	0.00674847	None	0	1	FALSE	FALSE	mPATSKI-DS15697 mPATSKI-DS15697	None
chr1	21004321	21005219	74659	None	I	0.0138	0.0161	0.0516	None	0.0192	Other	0.857143	0.372093	Tram2	0.0193	0.0115	0.0134	0.0744	0.0152	0.0181	0.0137	0.0155	0.0122	0.0192	0.0231	0.0149	0.00603021	0.00636885	0.00632008	0.00674847	None	0	1	FALSE	FALSE	mMuscle_Skeletal-DS18130	None
chr1	21013149	21013411	74660	M	None	0.0231	0.0198	0.0228	None	0.0282	Other	1.16667	1.23684	Tram2	0.0213	0.0124	0.0249	0.028	0.0105	0.0182	0.0257	0.0235	0.0146	0.0277	0.03	0.0278	0.00603021	0.00636885	0.00632008	0.00674847	None	0	1	FALSE	FALSE	mHeart-DS17909	None
chr1	21013470	21013743	74661	M	None	0.0228	0.0193	0.022	None	0.022	Other	1.18135	1	Tram2	0.016	0.0203	0.0263	0.0252	0.0179	0.0161	0.0197	0.0362	0.0164	0.0156	0.0333	0.026	0.00603021	0.00636885	0.00632008	0.00674847	None	0	0	FALSE	FALSE		None
chr1	21021572	21022216	74663	None	I	0.0146	0.0169	0.0327	None	0.0149	Other	0.863905	0.455657	Tram2	0.0162	0.0146	0.0216	0.0417	0.0167	0.0209	0.0146	0.0172	0.0114	0.0154	0.0156	0.0131	0.00603021	0.00636885	0.00632008	0.00674847	None	0	2	FALSE	FALSE	mLiver-DS14005 m416B-DS14099	None
chr1	21027612	21028277	74664	M	M	0.0201	0.0168	0.0197	None	0.024	Other	1.19643	1.21827	Tram2	0.0203	0.0127	0.0126	0.0234	0.0112	0.0166	0.0211	0.0209	0.0159	0.0269	0.018	0.0231	0.00603021	0.00636885	0.00632008	0.00674847	None	0	1	FALSE	FALSE	mA20-DS16695 mA20-DS16695	None
chr1	21039112	21039450	74665	None	I	0.0157	0.021	0.0292	None	0.0214	Enhancer4	0.747619	0.732877	Tram2	0.0196	0.0243	0.0206	0.0338	0.0279	0.0175	0.0107	0.0326	0.0114	0.0167	0.0313	0.0224	0.00603021	0.00636885	0.00632008	0.00674847	None	0	2	FALSE	FALSE	m416B-DS14099 mGenitalFatPad-DS18780	None
chr1	21040680	21041409	74666	IM	None	0.022	0.0217	0.0186	None	0.0228	Enhancer4	1.01382	1.22581	Tram2	0.0244	0.0164	0.0212	0.0205	0.0128	0.0181	0.0209	0.0272	0.0194	0.0196	0.0263	0.0269	0.00603021	0.00636885	0.00632008	0.00674847	None	0	2	FALSE	FALSE	MEL-DS13036 mMesoderm-DS18198	None
chr1	21041574	21043400	74667	IM	IM	0.0277	0.0327	0.0352	None	0.0315	Enhancer4	0.847095	0.894886	Tram2	0.0354	0.0278	0.0318	0.0451	0.0193	0.0204	0.0269	0.0305	0.027	0.027	0.0384	0.0354	0.00603021	0.00636885	0.00632008	0.00674847	None	0	5	FALSE	FALSE	MEL-DS13036 mfLiver_F3-DS20937 MEL-DS13036 m3134-DS8497 mPATSKI-DS15697 m3134-DS8497 mMuscle_Skeletal-DS18130	None
chr1	21043597	21044242	74668	IM	None	0.0257	0.0219	0.0157	None	0.0232	Enhancer4	1.17352	1.47771	Tram2	0.0276	0.0135	0.0172	0.0182	0.0082	0.015	0.0233	0.0296	0.0285	0.0231	0.0212	0.0254	0.00603021	0.00636885	0.00632008	0.00674847	None	0	1	FALSE	FALSE	mNIH_3T3-DS16900	None
chr1	21052152	21052411	74669	M	None	0.0242	0.0188	0.0177	None	0.0212	Other	1.28723	1.19774	Tram2	0.0182	0.0223	0.0161	0.016	0.0237	0.0172	0.0217	0.0282	0.0277	0.0195	0.023	0.0233	0.00603021	0.00636885	0.00632008	0.00674847	None	0	0	FALSE	FALSE		None
chr1	21054514	21055455	74670	M	None	0.0251	0.0224	0.0187	None	0.0223	Enhancer4	1.12054	1.19251	Tram2	0.0225	0.0187	0.0265	0.0196	0.0213	0.0141	0.0241	0.0259	0.0272	0.0247	0.0196	0.0193	0.00603021	0.00636885	0.00632008	0.00674847	None	0	1	FALSE	FALSE	CH12-DS22542	None
chr1	21057044	21057295	74671	M	None	0.022	0.0222	0.0155	None	0.02	Other	0.990991	1.29032	Tram2	0.0262	0.0133	0.0223	0.0155	0.0121	0.0183	0.0227	0.0162	0.0266	0.0209	0.0296	0.0078	0.00603021	0.00636885	0.00632008	0.00674847	None	0	0	FALSE	FALSE		None
chr1	21058380	21059070	74672	None	I	0.0167	0.0132	0.033	None	0.0161	Other	1.26515	0.487879	Tram2	0.0139	0.0139	0.0105	0.04	0.0229	0.0219	0.0187	0.0125	0.0154	0.0124	0.0225	0.0188	0.00603021	0.00636885	0.00632008	0.00674847	None	0	1	FALSE	FALSE	mPATSKI-DS15697	None
chr1	21063359	21063672	74673	I	None	0.0135	0.0259	0.0174	None	0.0191	Enhancer4	0.521236	1.0977	Tram2	0.0288	0.0198	0.0257	0.0204	0.0133	0.0125	0.0143	0.0123	0.0125	0.0166	0.0215	0.0226	0.00603021	0.00636885	0.00632008	0.00674847	None	0	2	FALSE	FALSE	CH12-DS22542 mIntestine_Large-DS19140	None
chr1	21064360	21065269	74674	IM	M	0.0264	0.025	0.0247	None	0.0267	Other	1.056	1.08097	Tram2	0.0246	0.0252	0.0255	0.0277	0.0193	0.0206	0.0257	0.0308	0.0237	0.0225	0.0275	0.0361	0.00603021	0.00636885	0.00632008	0.00674847	None	0	2	FALSE	FALSE	mATr-DS20149 mPATSKI-DS15697	None
chr1	21067169	21067577	74675	M	None	0.0243	0.0191	0.0218	None	0.0161	Other	1.27225	0.738532	Tram2	0.0159	0.0211	0.0249	0.0237	0.026	0.0129	0.0237	0.0262	0.0236	0.0171	0.0142	0.0155	0.00603021	0.00636885	0.00632008	0.00674847	None	0	2	FALSE	FALSE	mHeart-DS17909 mPATSKI-DS15697	None
chr1	21068673	21070145	74676	IM	IM	0.035	0.0983	0.088	None	0.049	AllTSS2	0.356053	0.556818	Tram2	0.131	0.0616	0.0583	0.1154	0.0402	0.0509	0.0386	0.0282	0.0316	0.0515	0.0463	0.0456	0.00603021	0.00636885	0.00632008	0.00674847	cUMR	1461	6	FALSE	FALSE	mNIH_3T3-DS16900 mfLiver-DS19246 mfLiver_F5-DS20999 m3134-DS8497 m3134-DS8497 mPATSKI-DS15697 mLiver-DS14005	None
chr1	21070510	21070907	74677	None	I	0.0189	0.0194	0.0285	None	0.0173	Enhancer4	0.974227	0.607018	6720483E21Rik	0.0201	0.0193	0.0176	0.0286	0.0293	0.0274	0.0174	0.0213	0.0209	0.0159	0.0202	0.0178	0.00603021	0.00636885	0.00632008	0.00674847	None	0	2	FALSE	FALSE	mTN-DS16171 mLiver-DS14005	None
chr1	21071218	21071520	74678	M	None	0.0229	0.017	0.0193	None	0.017	Enhancer4	1.34706	0.880829	6720483E21Rik	0.0138	0.0219	0.0191	0.0208	0.0165	0.0173	0.0239	0.0246	0.018	0.0182	0.0168	0.014	0.00603021	0.00636885	0.00632008	0.00674847	None	0	0	FALSE	FALSE		None
chr1	21072438	21073424	74679	M	M	0.0272	0.0198	0.0169	None	0.0243	Other	1.37374	1.43787	6720483E21Rik	0.0196	0.0186	0.0215	0.0197	0.0125	0.0127	0.0288	0.0224	0.0278	0.0231	0.0203	0.0316	0.00603021	0.00636885	0.00632008	0.00674847	None	0	1	FALSE	FALSE	mGenitalFatPad-DS18780	None
chr1	21079926	21080468	74680	None	I	0.0099	0.0128	0.0305	None	0.0172	Enhancer4	0.773438	0.563934	6720483E21Rik	0.0154	0.0104	0.0088	0.0346	0.0295	0.0199	0.0101	0.0076	0.0116	0.0175	0.0201	0.0133	0.00603021	0.00636885	0.00632008	0.00674847	None	0	2	FALSE	FALSE	mNIH_3T3-DS16900 mfLiver_DLCR-DS19241	None
chr1	21084609	21085752	74681	None	I	0.017	0.0174	0.0463	None	0.0191	Enhancer4	0.977011	0.412527	6720483E21Rik	0.0193	0.016	0.0145	0.0577	0.0297	0.0281	0.017	0.0181	0.016	0.0185	0.0208	0.0188	0.00603021	0.00636885	0.00632008	0.00674847	None	0	2	FALSE	FALSE	mPATSKI-DS15697 mThymus-DS18819 mPATSKI-DS15697	None
chr1	21090845	21091973	74682	IM	IM	0.0277	0.0416	0.0478	None	0.0372	Enhancer4	0.665865	0.778243	6720483E21Rik	0.0441	0.0401	0.037	0.0585	0.0337	0.0295	0.0244	0.0359	0.0282	0.0306	0.0457	0.0448	0.00603021	0.00636885	0.00632008	0.00674847	None	0	2	FALSE	FALSE	mPATSKI-DS15697 mMesoderm-DS18198	None
chr1	21145325	21145725	74683	M	None	0.0237	0.0233	0.0177	None	0.022	Other	1.01717	1.24294	Khdc1a	0.0233	0.0195	0.0278	0.0182	0.0167	0.0174	0.0212	0.0231	0.0323	0.0213	0.0259	0.0197	0.00603021	0.00636885	0.00632008	0.00674847	None	0	0	FALSE	FALSE		None
chr1	21149862	21150481	74684	M	None	0.0226	0.0152	0.0104	None	0.013	Other	1.48684	1.25	Khdc1a	0.0143	0.0175	0.0148	0.0112	0.0096	0.0089	0.0177	0.015	0.0471	0.0119	0.0156	0.0132	0.00603021	0.00636885	0.00632008	0.00674847	None	0	0	FALSE	FALSE		None
chr1	21151663	21152518	74685	IM	IM	0.022	0.0323	0.0451	None	0.0248	Other	0.681115	0.549889	Khdc1a	0.0319	0.0299	0.0363	0.0452	0.0507	0.04	0.0191	0.0265	0.0257	0.0213	0.0332	0.0248	0.00603021	0.00636885	0.00632008	0.00674847	None	0	1	FALSE	FALSE	mPATSKI-DS15697	None
chr1	21156137	21156850	74686	I	I	0.0153	0.0268	0.0312	None	0.0196	Other	0.570896	0.628205	Khdc1a	0.0346	0.018	0.0171	0.0339	0.0231	0.0303	0.0149	0.0177	0.0136	0.0174	0.0212	0.0234	0.00603021	0.00636885	0.00632008	0.00674847	None	0	3	FALSE	FALSE	mRetina-DS20000 mMesoderm-DS18198 mPATSKI-DS15697	None
chr1	21157107	21157672	74687	M	None	0.02	0.0142	0.0104	None	0.0183	Other	1.40845	1.75962	Khdc1a	0.0167	0.0122	0.0101	0.0097	0.0112	0.0117	0.0183	0.0163	0.0297	0.0151	0.0284	0.0156	0.00603021	0.00636885	0.00632008	0.00674847	None	0	1	FALSE	FALSE	mGenitalFatPad-DS18780	None
chr1	21199279	21199705	74688	M	None	0.0246	0.0199	0.0162	None	0.0212	Other	1.23618	1.30864	Khdc1a	0.0193	0.0189	0.0224	0.0154	0.0216	0.0138	0.0249	0.0276	0.02	0.0229	0.0134	0.0253	0.00603021	0.00636885	0.00632008	0.00674847	None	0	0	FALSE	FALSE		None
chr1	21200097	21200555	74689	M	None	0.019	0.0131	0.0146	None	0.017	Other	1.45038	1.16438	Khdc1a	0.0131	0.0118	0.0147	0.0142	0.0181	0.0129	0.0183	0.0168	0.0238	0.0168	0.0191	0.0151	0.00603021	0.00636885	0.00632008	0.00674847	None	0	0	FALSE	FALSE		None
chr1	21203347	21204107	74690	IM	IM	0.0213	0.0424	0.039	None	0.0213	Other	0.502358	0.546154	Khdc1a	0.0451	0.0367	0.0422	0.0441	0.0331	0.0297	0.0189	0.0211	0.0291	0.0184	0.0263	0.0232	0.00603021	0.00636885	0.00632008	0.00674847	None	0	1	FALSE	FALSE	mMesoderm-DS18198	None
chr1	21204272	21204737	74691	IM	I	0.0216	0.0239	0.0246	None	0.0238	Other	0.903766	0.96748	Khdc1a	0.0262	0.0211	0.0215	0.0247	0.0321	0.0181	0.0203	0.0254	0.021	0.0234	0.0258	0.0229	0.00603021	0.00636885	0.00632008	0.00674847	None	0	2	FALSE	FALSE	mCerebrum-DS14024 mGenitalFatPad-DS18780	None
chr1	21207699	21209315	74692	IM	IM	0.0264	0.0355	0.0428	None	0.0257	AllTSS2	0.743662	0.600467	Tmem14a	0.0367	0.0323	0.0364	0.0494	0.03	0.0348	0.0233	0.0319	0.0296	0.0212	0.0342	0.0277	0.00603021	0.00636885	0.00632008	0.00674847	cUMR	1114	3	FALSE	FALSE	mRetina-DS20000 mSpleen-DS18870 mPATSKI-DS15697	None
chr1	21209504	21210179	74693	IM	IM	0.0264	0.0239	0.0253	None	0.0261	Enhancer4	1.1046	1.03162	Tmem14a	0.0224	0.0267	0.0243	0.0293	0.0221	0.0166	0.0288	0.0271	0.0178	0.0229	0.0298	0.0298	0.00603021	0.00636885	0.00632008	0.00674847	None	0	2	FALSE	FALSE	mGenitalFatPad-DS18780 mBrain-DS12727	None
chr1	21210234	21210669	74694	M	M	0.0244	0.02	0.0237	None	0.0268	Enhancer4	1.22	1.1308	Tmem14a	0.0223	0.0169	0.0177	0.0251	0.0227	0.0207	0.0207	0.0297	0.0299	0.0214	0.0312	0.0355	0.00603021	0.00636885	0.00632008	0.00674847	None	0	1	FALSE	FALSE	ZhBTc4-DS15236	None
chr1	21211669	21212072	74695	M	None	0.0223	0.0191	0.0176	None	0.0196	Enhancer4	1.16754	1.11364	Tmem14a	0.0203	0.0162	0.0195	0.0202	0.0216	0.0073	0.0211	0.0259	0.0217	0.0168	0.0262	0.0195	0.00603021	0.00636885	0.00632008	0.00674847	None	0	0	FALSE	FALSE		None
chr1	21217108	21217404	74696	M	None	0.0218	0.0171	0.0146	None	0.0119	Other	1.27485	0.815068	Tmem14a	0.0183	0.0186	0.0122	0.0187	0.005	0.011	0.0207	0.022	0.0249	0.0104	0.0146	0.0131	0.00603021	0.00636885	0.00632008	0.00674847	None	0	0	FALSE	FALSE		None
chr1	21219198	21219893	74697	IM	IM	0.0168	0.016	0.018	None	0.0178	Other	1.05	0.988889	Tmem14a	0.0183	0.0168	0.0089	0.0219	0.0114	0.0128	0.0204	0.0107	0.0126	0.0179	0.0195	0.0157	0.00603021	0.00636885	0.00632008	0.00674847	None	0	2	FALSE	FALSE	mLiver-DS14005 mBrain-DS12727	None
chr1	21220153	21221233	74698	IM	IM	0.0186	0.0227	0.0164	None	0.0224	Other	0.819383	1.36585	Tmem14a	0.0259	0.0177	0.0203	0.0172	0.0133	0.0166	0.0188	0.0189	0.0178	0.0193	0.0295	0.0227	0.00603021	0.00636885	0.00632008	0.00674847	None	0	2	FALSE	FALSE	mCerebrum-DS14024 mIntestine_Large-DS19140	None
chr1	21221444	21221982	74699	M	None	0.0232	0.0226	0.0218	None	0.0209	Other	1.02655	0.958716	Khdc1a	0.0234	0.0186	0.0249	0.0212	0.025	0.0209	0.0231	0.0237	0.023	0.0183	0.0235	0.0249	0.00603021	0.00636885	0.00632008	0.00674847	None	0	1	FALSE	FALSE	mIntestine_Large-DS19140	None
chr1	21230242	21230870	74700	None	I	0.0115	0.0164	0.032	None	0.0138	AllTSS2	0.70122	0.43125	Gsta3	0.0162	0.0154	0.0181	0.041	0.0189	0.0176	0.0117	0.0077	0.0152	0.0135	0.0133	0.015	0.00603021	0.00636885	0.00632008	0.00674847	None	0	2	FALSE	FALSE	mGER-DS15400 mKidney-DS13948	None
chr1	21234974	21235225	74701	M	None	0.0216	0.0215	0.0178	None	0.0171	Other	1.00465	0.960674	Gsta3	0.0261	0.0122	0.0207	0.0179	0.0178	0.0175	0.0213	0.0226	0.0216	0.0142	0.0214	0.0196	0.00603021	0.00636885	0.00632008	0.00674847	None	0	0	FALSE	FALSE		None
chr1	21236136	21236521	74702	M	None	0.0256	0.02	0.0239	None	0.0189	Other	1.28	0.790795	Gsta3	0.0204	0.0143	0.0256	0.0245	0.0241	0.022	0.0235	0.0309	0.0258	0.0151	0.027	0.0196	0.00603021	0.00636885	0.00632008	0.00674847	None	0	1	FALSE	FALSE	mLiver-DS14005	None
chr1	21239050	21239498	74703	M	None	0.024	0.0241	0.0241	None	0.0194	Other	0.995851	0.804979	Gsta3	0.0271	0.024	0.0165	0.0302	0.0141	0.0153	0.0204	0.0301	0.028	0.019	0.0224	0.0174	0.00603021	0.00636885	0.00632008	0.00674847	None	0	2	FALSE	FALSE	MEL-DS13036 ZhBTc4-DS17562	None
chr1	21259638	21260203	74704	M	IM	0.0272	0.022	0.023	None	0.0272	Other	1.23636	1.18261	Khdc1a	0.0211	0.0231	0.023	0.0259	0.0196	0.0174	0.0275	0.0258	0.0282	0.0276	0.0284	0.0249	0.00603021	0.00636885	0.00632008	0.00674847	None	0	0	FALSE	FALSE		None
chr1	21260508	21260781	74705	M	None	0.0216	0.0249	0.0243	None	0.0226	Other	0.86747	0.930041	Khdc1a	0.0265	0.0215	0.025	0.0274	0.0235	0.0162	0.0244	0.0202	0.0143	0.0211	0.0235	0.0252	0.00603021	0.00636885	0.00632008	0.00674847	None	0	0	FALSE	FALSE		None
chr1	21260957	21262729	74706	IM	IM	0.0346	0.0448	0.0322	None	0.0272	AllTSS2	0.772321	0.84472	Khdc1a	0.0478	0.0409	0.0418	0.0393	0.0205	0.0221	0.0356	0.0332	0.0329	0.0202	0.038	0.0331	0.00603021	0.00636885	0.00632008	0.00674847	None	0	4	FALSE	FALSE	mTR-DS17864 mTR-DS17864 mTN-DS16171 mHeart-DS17909 mCD1-DS17129	None
chr1	21263174	21263741	74707	M	None	0.0273	0.0204	0.0167	None	0.0161	Other	1.33824	0.964072	Khdc1a	0.0205	0.0226	0.0175	0.0192	0.0121	0.0137	0.029	0.024	0.0259	0.0146	0.0177	0.0183	0.00603021	0.00636885	0.00632008	0.00674847	None	0	1	FALSE	FALSE	mTR-DS17864	None
chr1	21266009	21266784	74708	IM	IM	0.0233	0.0398	0.0401	None	0.0232	Other	0.585427	0.578554	Khdc1a	0.0443	0.0353	0.0336	0.0461	0.0267	0.0343	0.021	0.0245	0.0294	0.0186	0.031	0.0264	0.00603021	0.00636885	0.00632008	0.00674847	None	0	2	FALSE	FALSE	mATr-DS20149 mThymus-DS18819	None
chr1	21273381	21273854	74709	I	None	0.0149	0.0191	0.0148	None	0.0172	Other	0.780105	1.16216	Khdc1a	0.0211	0.0142	0.0196	0.0173	0.0093	0.0125	0.0157	0.0169	0.0098	0.0176	0.02	0.0131	0.00603021	0.00636885	0.00632008	0.00674847	None	0	0	FALSE	FALSE		None
chr1	21274587	21275200	74710	IM	None	0.0167	0.0195	0.0159	None	0.0161	Other	0.85641	1.01258	Khdc1a	0.0252	0.013	0.0126	0.0147	0.0193	0.0167	0.016	0.0187	0.0167	0.0156	0.0178	0.0154	0.00603021	0.00636885	0.00632008	0.00674847	None	0	1	FALSE	FALSE	CH12-DS22542	None
chr1	21294042	21294687	74711	None	I	0.0171	0.0136	0.0345	None	0.0173	Enhancer4	1.25735	0.501449	Khdc1a	0.0145	0.0123	0.013	0.0429	0.0208	0.022	0.0188	0.0154	0.0139	0.0173	0.014	0.0209	0.00603021	0.00636885	0.00632008	0.00674847	None	0	2	FALSE	FALSE	mLiver-DS14005 mTN-DS16171	None
chr1	21299245	21299776	74712	None	I	0.0128	0.0192	0.0316	None	0.0171	Enhancer4	0.666667	0.541139	Khdc1a	0.0173	0.0167	0.0268	0.0327	0.029	0.0308	0.0118	0.0174	0.0108	0.0123	0.0225	0.0234	0.00603021	0.00636885	0.00632008	0.00674847	None	0	1	FALSE	FALSE	mATr-DS20149	None
chr1	21309948	21310597	74713	IM	IM	0.0195	0.0287	0.0276	None	0.0282	Other	0.679443	1.02174	Khdc1a	0.0395	0.0113	0.0216	0.0293	0.0251	0.0248	0.0202	0.0208	0.0159	0.0311	0.0269	0.0223	0.00603021	0.00636885	0.00632008	0.00674847	None	0	1	FALSE	FALSE	mLiver-DS14005	None
chr1	21318234	21318918	74714	I	I	0.0171	0.0229	0.0294	None	0.0209	Enhancer4	0.746725	0.710884	Khdc1a	0.0241	0.0184	0.0253	0.034	0.0211	0.0234	0.016	0.0213	0.0156	0.0181	0.0181	0.0307	0.00603021	0.00636885	0.00632008	0.00674847	None	0	3	FALSE	FALSE	mKidney-DS13948 mGER-DS15420 mLiver-DS14005	None
chr1	21320088	21320989	74715	I	I	0.0186	0.0234	0.0364	None	0.0196	Enhancer4	0.794872	0.538462	Khdc1a	0.0248	0.0188	0.0254	0.04	0.0293	0.032	0.0157	0.0239	0.0218	0.0193	0.0195	0.0203	0.00603021	0.00636885	0.00632008	0.00674847	None	0	1	FALSE	FALSE	mfLiver_DLCR-DS19241	None
chr1	21323026	21324229	74716	I	I	0.0129	0.0221	0.0419	None	0.017	Enhancer4	0.58371	0.405728	Khdc1a	0.0203	0.0235	0.0248	0.0474	0.0316	0.0354	0.0117	0.0145	0.0148	0.0153	0.0214	0.0166	0.00603021	0.00636885	0.00632008	0.00674847	None	0	4	FALSE	FALSE	mGER-DS15410 mGER-DS15400 mfLiver_F2-DS20994 mATr-DS20149	None
chr1	21325495	21327020	74717	I	I	0.0138	0.02	0.0365	None	0.0162	Enhancer4	0.69	0.443836	Khdc1a	0.0197	0.02	0.0209	0.0448	0.024	0.0235	0.0122	0.0147	0.0179	0.0152	0.0181	0.0167	0.00603021	0.00636885	0.00632008	0.00674847	None	0	2	FALSE	FALSE	MEL-DS13036 mGER-DS15400 mGER-DS15400	None
chr1	21327265	21327676	74718	IM	None	0.022	0.0241	0.0218	None	0.0161	Other	0.912863	0.738532	Khdc1a	0.0243	0.0208	0.0272	0.0236	0.0128	0.0242	0.0213	0.0237	0.0221	0.012	0.0192	0.0231	0.00603021	0.00636885	0.00632008	0.00674847	None	0	0	FALSE	FALSE		None
chr1	21333509	21335013	74719	IM	IM	0.0234	0.0313	0.0494	None	0.024	Enhancer4	0.747604	0.48583	Khdc1a	0.0297	0.0319	0.0347	0.0587	0.03	0.0398	0.0221	0.0262	0.0238	0.0193	0.0314	0.0279	0.00603021	0.00636885	0.00632008	0.00674847	None	0	2	FALSE	FALSE	mTR-DS17864 mGER-DS15420	None
chr1	21335102	21335578	74720	None	IM	0.0143	0.015	0.0228	None	0.0217	Enhancer4	0.953333	0.951754	Khdc1a	0.0161	0.0128	0.0146	0.0289	0.0136	0.0137	0.0157	0.0115	0.0134	0.0234	0.0217	0.0176	0.00603021	0.00636885	0.00632008	0.00674847	None	0	2	FALSE	FALSE	E14-DS21450 mGER-DS15400	None
chr1	21339616	21341378	74722	None	IM	0.0139	0.0139	0.015	None	0.0156	AllTSS2	1	1.04	Khdc1a	0.0135	0.0148	0.0139	0.0157	0.0144	0.0133	0.0127	0.0161	0.0153	0.0147	0.0163	0.0171	0.00603021	0.00636885	0.00632008	0.00674847	None	0	0	FALSE	FALSE		None
chr1	21346312	21348788	74723	IM	IM	0.019	0.0175	0.0164	None	0.0182	Other	1.08571	1.10976	Khdc1a	0.0185	0.0154	0.0176	0.0176	0.0128	0.0161	0.0172	0.0186	0.0249	0.0175	0.019	0.0191	0.00603021	0.00636885	0.00632008	0.00674847	None	0	0	FALSE	FALSE		None
chr1	21358077	21359992	74726	None	IM	0.0122	0.0129	0.016	None	0.017	AllTSS2	0.945736	1.0625	Khdc1c	0.0125	0.0115	0.0154	0.0169	0.0146	0.0147	0.011	0.0139	0.0137	0.0175	0.0165	0.0161	0.00603021	0.00636885	0.00632008	0.00674847	None	0	0	FALSE	FALSE		None
chr1	21364960	21366525	74728	IM	IM	0.0197	0.0161	0.0169	None	0.0156	Other	1.2236	0.923077	Khdc1a	0.0152	0.016	0.0184	0.0166	0.0162	0.0183	0.0185	0.0218	0.021	0.0166	0.0145	0.0143	0.00603021	0.00636885	0.00632008	0.00674847	None	0	0	FALSE	FALSE		None
chr1	21370286	21370973	74730	None	I	0.0142	0.0101	0.0141	None	0.012	Other	1.40594	0.851064	Khdc1a	0.0104	0.0094	0.0102	0.0138	0.0128	0.0158	0.0157	0.011	0.0135	0.0107	0.0131	0.0142	0.00603021	0.00636885	0.00632008	0.00674847	None	0	1	FALSE	FALSE	mHindlimbsBuds-DS18279	None
chr1	21373962	21374480	74731	None	M	0.0127	0.0138	0.0119	None	0.0183	Other	0.92029	1.53782	Khdc1b	0.014	0.0095	0.0183	0.012	0.0127	0.0107	0.0117	0.0161	0.012	0.0184	0.0187	0.0174	0.00603021	0.00636885	0.00632008	0.00674847	None	0	0	FALSE	FALSE		None
chr1	21379369	21380138	74732	M	None	0.0229	0.0141	0.0141	None	0.0174	Other	1.62411	1.23404	Khdc1a	0.0122	0.0151	0.0179	0.0156	0.0137	0.0101	0.0215	0.0257	0.0241	0.018	0.0179	0.0154	0.00603021	0.00636885	0.00632008	0.00674847	None	0	0	FALSE	FALSE		None
chr1	21380950	21381854	74733	IM	M	0.0237	0.0209	0.0187	None	0.025	AllTSS2	1.13397	1.3369	Khdc1a	0.0204	0.0167	0.0267	0.0181	0.0188	0.0202	0.0209	0.0257	0.0301	0.0251	0.0268	0.0228	0.00603021	0.00636885	0.00632008	0.00674847	None	0	0	FALSE	FALSE		None
chr1	21401125	21401893	74734	I	I	0.0127	0.023	0.0353	None	0.0149	Other	0.552174	0.422096	Kcnq5	0.0222	0.0246	0.0232	0.04	0.0234	0.0319	0.0129	0.0109	0.0145	0.0133	0.0183	0.0154	0.00603021	0.00636885	0.00632008	0.00674847	None	0	3	FALSE	FALSE	m416B-DS14099 mCerebrum-DS14024 mPATSKI-DS15697	None
chr1	21448771	21449141	74735	I	M	0.017	0.0205	0.0183	None	0.023	Other	0.829268	1.25683	Kcnq5	0.019	0.0172	0.0283	0.021	0.0146	0.014	0.0156	0.0234	0.0141	0.0262	0.0183	0.0203	0.00603021	0.00636885	0.00632008	0.00674847	None	0	1	FALSE	FALSE	mBrain-DS12727	None
chr1	21450959	21451731	74736	I	I	0.0135	0.0192	0.0266	None	0.0152	Other	0.703125	0.571429	Kcnq5	0.0213	0.0185	0.0144	0.028	0.0272	0.0224	0.0144	0.0168	0.0069	0.0157	0.014	0.0151	0.00603021	0.00636885	0.00632008	0.00674847	None	0	1	FALSE	FALSE	mMesoderm-DS18198 mMesoderm-DS18198	None
chr1	21477306	21477584	74738	M	None	0.0192	0.0135	0.0156	None	0.0148	Other	1.42222	0.948718	Kcnq5	0.012	0.0101	0.0215	0.0171	0.0117	0.0146	0.0191	0.0186	0.0203	0.0126	0.0145	0.0205	0.00603021	0.00636885	0.00632008	0.00674847	None	0	2	FALSE	FALSE	mMesoderm-DS18198 mFibroblast-DS10088	None
chr1	21510384	21510651	74742	M	None	0.0204	0.0147	0.0133	None	0.019	Other	1.38776	1.42857	Kcnq5	0.0128	0.0142	0.0202	0.0122	0.0133	0.0163	0.0215	0.015	0.0232	0.0158	0.0285	0.017	0.00603021	0.00636885	0.00632008	0.00674847	None	0	1	FALSE	FALSE	CH12-DS22542	None
chr1	21510706	21511332	74743	M	None	0.0209	0.0128	0.0129	None	0.0179	Other	1.63281	1.3876	Kcnq5	0.0099	0.013	0.02	0.0131	0.0092	0.015	0.0224	0.0203	0.0169	0.0176	0.0193	0.0173	0.00603021	0.00636885	0.00632008	0.00674847	None	0	1	FALSE	FALSE	mMuscle_Skeletal-DS18130	None
chr1	21511900	21512635	74744	IM	IM	0.0195	0.0185	0.0239	None	0.0177	Other	1.05405	0.740586	Kcnq5	0.018	0.0196	0.0185	0.0255	0.0224	0.0207	0.0208	0.0189	0.0164	0.017	0.0198	0.0173	0.00603021	0.00636885	0.00632008	0.00674847	None	0	1	FALSE	FALSE	CH12-DS22542	None
chr1	21515566	21516505	74745	IM	None	0.0216	0.0172	0.012	None	0.0148	Other	1.25581	1.23333	Kcnq5	0.0182	0.0188	0.0129	0.0114	0.0159	0.0104	0.0197	0.0179	0.032	0.0121	0.0189	0.0171	0.00603021	0.00636885	0.00632008	0.00674847	None	0	0	FALSE	FALSE		None
chr1	21517458	21518089	74746	I	None	0.018	0.0193	0.0162	None	0.0171	Other	0.932642	1.05556	Kcnq5	0.0194	0.0202	0.018	0.0175	0.0128	0.0152	0.0197	0.0138	0.0177	0.0149	0.0202	0.0194	0.00603021	0.00636885	0.00632008	0.00674847	None	0	2	FALSE	FALSE	mRetina-DS20000 m416B-DS14099	None
chr1	21542650	21543317	74748	None	I	0.0095	0.0093	0.0211	None	0.0114	Other	1.02151	0.540284	Kcnq5	0.0079	0.0105	0.0112	0.0272	0.0163	0.0082	0.0068	0.0136	0.0133	0.0115	0.0067	0.0162	0.00603021	0.00636885	0.00632008	0.00674847	None	0	2	FALSE	FALSE	mPATSKI-DS15697 mCerebrum-DS14024	None
chr1	21544607	21545153	74749	None	I	0.0107	0.0079	0.0222	None	0.0112	Other	1.35443	0.504505	Kcnq5	0.0071	0.0106	0.0067	0.0292	0.0105	0.0122	0.0087	0.0101	0.0176	0.0111	0.0099	0.0131	0.00603021	0.00636885	0.00632008	0.00674847	None	0	1	FALSE	FALSE	m416B-DS14099	None
chr1	21596546	21596995	74750	M	None	0.0189	0.0138	0.0134	None	0.0121	Other	1.36957	0.902985	Kcnq5	0.0097	0.0155	0.0223	0.0124	0.0123	0.0171	0.0186	0.0157	0.0234	0.0116	0.0136	0.012	0.00603021	0.00636885	0.00632008	0.00674847	None	0	1	FALSE	FALSE	mForelimbBuds-DS18275	None
chr1	21598491	21599006	74751	M	None	0.0184	0.0112	0.0124	None	0.0113	Other	1.64286	0.91129	Kcnq5	0.0089	0.0151	0.0123	0.0123	0.0116	0.0134	0.0205	0.01	0.0216	0.0096	0.0142	0.0122	0.00603021	0.00636885	0.00632008	0.00674847	None	0	1	FALSE	FALSE	mCerebrum-DS14024	None
chr1	21603138	21603619	74752	M	None	0.0182	0.0109	0.0097	None	0.0091	Other	1.66972	0.938144	Kcnq5	0.0085	0.0165	0.0103	0.0101	0.0102	0.0083	0.0183	0.0154	0.0211	0.009	0.0068	0.0119	0.00603021	0.00636885	0.00632008	0.00674847	None	0	0	FALSE	FALSE		None
chr1	21609359	21609851	74754	M	None	0.0183	0.015	0.0131	None	0.0115	Other	1.22	0.877863	Kcnq5	0.0125	0.0167	0.0195	0.0122	0.0168	0.0125	0.0136	0.0263	0.024	0.0106	0.0133	0.0118	0.00603021	0.00636885	0.00632008	0.00674847	None	0	0	FALSE	FALSE		None
chr1	21704747	21705511	74758	IM	IM	0.0186	0.0238	0.0199	None	0.0188	Other	0.781513	0.944724	Kcnq5	0.0264	0.0179	0.0242	0.0189	0.0241	0.0192	0.017	0.0179	0.0246	0.0193	0.0176	0.0185	0.00603021	0.00636885	0.00632008	0.00674847	None	0	1	FALSE	FALSE	CH12-DS22542	None
chr1	21707160	21707536	74759	M	None	0.0151	0.0109	0.0098	None	0.0143	Other	1.38532	1.45918	Kcnq5	0.0104	0.0126	0.0101	0.0101	0.0093	0.0093	0.0108	0.0193	0.0237	0.015	0.0165	0.01	0.00603021	0.00636885	0.00632008	0.00674847	None	0	1	FALSE	FALSE	mCJ7-DS13320	None
chr1	21720139	21720693	74761	None	I	0.0099	0.0122	0.0151	None	0.0101	Other	0.811475	0.668874	Kcnq5	0.0099	0.019	0.0103	0.0153	0.0123	0.0167	0.0104	0.0094	0.0093	0.0106	0.0059	0.0132	0.00603021	0.00636885	0.00632008	0.00674847	None	0	1	FALSE	FALSE	mCerebrum-DS14024	None
chr1	21766984	21767595	74765	M	None	0.0201	0.0099	0.0103	None	0.009	Other	2.0303	0.873786	Kcnq5	0.0093	0.0119	0.0093	0.0103	0.0141	0.0069	0.0158	0.0148	0.0401	0.0088	0.0113	0.0071	0.00603021	0.00636885	0.00632008	0.00674847	None	0	0	FALSE	FALSE		None
chr1	21948015	21948722	74777	M	None	0.0205	0.0126	0.0091	None	0.0136	Other	1.62698	1.49451	Kcnq5	0.0115	0.0166	0.0106	0.0083	0.0125	0.0084	0.0235	0.0147	0.018	0.0126	0.0136	0.0159	0.00603021	0.00636885	0.00632008	0.00674847	None	0	2	FALSE	FALSE	mCerebrum-DS14024 mPATSKI-DS15697	None
chr1	21949161	21955729	74778	IM	M	0.03	0.0255	0.0125	None	0.0204	AllTSS2	1.17647	1.632	Kcnq5	0.0302	0.0212	0.0186	0.0139	0.0091	0.0114	0.0349	0.0221	0.0236	0.0186	0.0247	0.0205	0.00603021	0.00636885	0.00632008	0.00674847	Canyon	4038	9	FALSE	FALSE	mCerebrum-DS14024 mMesoderm-DS18198 mA20-DS16695 mA20-DS16695 m416B-DS14099 mfLiver_F1-DS20991 CH12-DS22542 mThymus-DS18819 mMesoderm-DS18198 mBrain-DS12727 CH12-DS22542 mA20-DS16695 mA20-DS16695 CH12-DS22542 mfLiver_F2-DS20994 CH12-DS22542 mThymus-DS18819 CH12-DS22542 mA20-DS16695 mA20-DS16695	None
chr1	21955991	21957067	74779	M	None	0.0211	0.0128	0.0096	None	0.0141	Other	1.64844	1.46875	Khdc1a	0.0107	0.0142	0.0165	0.0104	0.0075	0.0092	0.0215	0.0199	0.0212	0.0128	0.0158	0.0153	0.00603021	0.00636885	0.00632008	0.00674847	None	0	1	FALSE	FALSE	mPATSKI-DS15697	None
chr1	22022280	22022942	74782	M	None	0.0187	0.0117	0.0124	None	0.0151	Other	1.59829	1.21774	Khdc1a	0.0099	0.0175	0.0095	0.0115	0.0181	0.0103	0.0168	0.0229	0.0197	0.0145	0.017	0.0147	0.00603021	0.00636885	0.00632008	0.00674847	None	0	0	FALSE	FALSE		None
chr1	22037413	22038507	74783	M	M	0.0197	0.0136	0.0123	None	0.0181	Other	1.44853	1.47154	Khdc1a	0.0129	0.0146	0.0143	0.0109	0.0121	0.0165	0.0202	0.0176	0.0204	0.0167	0.0206	0.0191	0.00603021	0.00636885	0.00632008	0.00674847	None	0	0	FALSE	FALSE		None
chr1	22095564	22096012	74785	None	I	0.0093	0.0104	0.0175	None	0.0105	Other	0.894231	0.6	Khdc1a	0.0109	0.01	0.0094	0.016	0.0185	0.0207	0.0075	0.0097	0.0144	0.0089	0.017	0.0077	0.00603021	0.00636885	0.00632008	0.00674847	None	0	1	FALSE	FALSE	CH12-DS22542	None
chr1	22170894	22172897	74790	M	M	0.0203	0.0144	0.0122	None	0.0186	Other	1.40972	1.52459	Khdc1a	0.0148	0.0142	0.0134	0.0106	0.0144	0.0151	0.0195	0.0199	0.0233	0.0195	0.0155	0.0199	0.00603021	0.00636885	0.00632008	0.00674847	None	0	1	FALSE	FALSE	mGenitalFatPad-DS18780	None
chr1	22215861	22216170	74791	M	None	0.0196	0.0128	0.0109	None	0.012	Other	1.53125	1.10092	Khdc1a	0.0127	0.0136	0.012	0.0112	0.0093	0.0116	0.0185	0.0151	0.0281	0.0154	0.0082	0.0079	0.00603021	0.00636885	0.00632008	0.00674847	None	0	0	FALSE	FALSE		None
chr1	22232802	22233198	74793	M	None	0.0193	0.0094	0.0108	None	0.0134	Other	2.05319	1.24074	Khdc1a	0.0087	0.0104	0.0097	0.0106	0.0125	0.0099	0.019	0.0212	0.0181	0.0145	0.0067	0.0178	0.00603021	0.00636885	0.00632008	0.00674847	None	0	0	FALSE	FALSE		None
chr1	22256349	22257845	74794	M	None	0.0197	0.0134	0.0132	None	0.0152	Other	1.47015	1.15152	Khdc1a	0.0119	0.0141	0.0165	0.0127	0.0163	0.0121	0.019	0.0183	0.0236	0.015	0.0123	0.0187	0.00603021	0.00636885	0.00632008	0.00674847	None	0	1	FALSE	FALSE	mCerebrum-DS14024	None
chr1	22258869	22259630	74795	I	I	0.0133	0.0179	0.0278	None	0.0126	Other	0.743017	0.453237	Khdc1a	0.0173	0.0154	0.0226	0.0277	0.0262	0.0291	0.0128	0.0126	0.0157	0.0123	0.0127	0.0132	0.00603021	0.00636885	0.00632008	0.00674847	None	0	1	FALSE	FALSE	mPATSKI-DS15697	None
chr1	22286731	22287321	74798	M	None	0.0181	0.0135	0.0132	None	0.014	Other	1.34074	1.06061	Rims1	0.0146	0.0131	0.0112	0.0141	0.0148	0.0095	0.0178	0.0189	0.0178	0.015	0.0137	0.0119	0.00603021	0.00636885	0.00632008	0.00674847	None	0	0	FALSE	FALSE		None
chr1	22287348	22287606	74799	M	None	0.017	0.0101	0.0102	None	0.0115	Other	1.68317	1.12745	Rims1	0.0112	0.008	0.0096	0.0083	0.0145	0.0121	0.0126	0.0253	0.0208	0.0115	0.0101	0.0128	0.00603021	0.00636885	0.00632008	0.00674847	None	0	0	FALSE	FALSE		None
chr1	22298186	22300086	74800	IM	IM	0.0257	0.0167	0.0104	None	0.0159	Other	1.53892	1.52885	Rims1	0.0165	0.0187	0.0147	0.0101	0.011	0.0104	0.0287	0.0217	0.0213	0.0151	0.0184	0.0154	0.00603021	0.00636885	0.00632008	0.00674847	None	0	0	FALSE	FALSE		None
chr1	22300130	22303649	74801	IM	M	0.0309	0.0205	0.0111	None	0.0192	Other	1.50732	1.72973	Rims1	0.0209	0.0228	0.017	0.0115	0.0113	0.0101	0.0339	0.0255	0.0277	0.0155	0.0231	0.024	0.00603021	0.00636885	0.00632008	0.00674847	None	0	1	FALSE	FALSE	mCerebellum-DS14034	None
chr1	22303661	22304696	74802	M	None	0.0189	0.0147	0.0085	None	0.0117	Other	1.28571	1.37647	Rims1	0.0126	0.0212	0.0123	0.0079	0.0105	0.0088	0.0196	0.0177	0.0181	0.0102	0.0113	0.016	0.00603021	0.00636885	0.00632008	0.00674847	None	0	0	FALSE	FALSE		None
chr1	22305046	22306014	74803	M	None	0.0193	0.0125	0.0089	None	0.0135	AllTSS2	1.544	1.51685	Rims1	0.0088	0.0157	0.0185	0.0083	0.0081	0.011	0.0228	0.0148	0.0135	0.014	0.0144	0.0112	0.00603021	0.00636885	0.00632008	0.00674847	None	0	1	FALSE	FALSE	mKidney-DS13948	None
chr1	22338777	22339415	74807	M	None	0.0194	0.0127	0.013	None	0.0142	Other	1.52756	1.09231	Rims1	0.0115	0.0158	0.0121	0.0147	0.0105	0.0106	0.0178	0.022	0.0216	0.0152	0.0127	0.0134	0.00603021	0.00636885	0.00632008	0.00674847	None	0	0	FALSE	FALSE		None
chr1	22381696	22382080	74809	M	None	0.0184	0.0163	0.0125	None	0.0135	Other	1.12883	1.08	Rims1	0.0164	0.0179	0.0143	0.0123	0.0092	0.0159	0.0223	0.0097	0.0163	0.0115	0.016	0.0158	0.00603021	0.00636885	0.00632008	0.00674847	None	0	0	FALSE	FALSE		None
chr1	22384514	22384984	74811	M	None	0.0187	0.0073	0.0092	None	0.0108	Other	2.56164	1.17391	Rims1	0.0058	0.0105	0.0075	0.011	0.0068	0.006	0.0214	0.0112	0.0193	0.0092	0.0147	0.0108	0.00603021	0.00636885	0.00632008	0.00674847	None	0	0	FALSE	FALSE		None
chr1	22494151	22494557	74812	None	I	0.0152	0.0107	0.0172	None	0.0101	Other	1.42056	0.587209	Rims1	0.0109	0.0157	0.0042	0.0177	0.019	0.0141	0.0111	0.0202	0.0222	0.0098	0.0084	0.0126	0.00603021	0.00636885	0.00632008	0.00674847	None	0	1	FALSE	FALSE	CH12-DS22542	None
chr1	22514041	22515095	74814	M	M	0.018	0.0139	0.0133	None	0.0173	Other	1.29496	1.30075	Rims1	0.013	0.0145	0.0158	0.0128	0.0166	0.0117	0.018	0.0166	0.0198	0.0201	0.0124	0.0156	0.00603021	0.00636885	0.00632008	0.00674847	None	0	3	FALSE	FALSE	mBrain-DS12727 mMesoderm-DS18198 mCerebrum-DS14024	None
chr1	22515665	22516673	74815	M	None	0.0196	0.0128	0.0124	None	0.0169	Other	1.53125	1.3629	Rims1	0.0137	0.0111	0.0125	0.013	0.009	0.0135	0.0187	0.0205	0.0211	0.0174	0.0199	0.0127	0.00603021	0.00636885	0.00632008	0.00674847	None	0	2	FALSE	FALSE	mCerebellum-DS14034 mBrain-DS12727	None
chr1	22532570	22532852	74817	M	None	0.016	0.0131	0.0114	None	0.0132	Other	1.22137	1.15789	Rims1	0.0136	0.012	0.0132	0.0099	0.0079	0.0184	0.0163	0.015	0.0163	0.0141	0.012	0.0124	0.00603021	0.00636885	0.00632008	0.00674847	None	0	0	FALSE	FALSE		None
chr1	22532913	22534138	74818	M	None	0.0185	0.0111	0.0108	None	0.0136	Other	1.66667	1.25926	Rims1	0.011	0.0147	0.0072	0.0101	0.0103	0.0132	0.0185	0.0164	0.0208	0.0121	0.0134	0.0176	0.00603021	0.00636885	0.00632008	0.00674847	None	0	1	FALSE	FALSE	mCerebrum-DS14024 mCerebrum-DS14024	None
chr1	22539706	22541143	74819	I	None	0.0122	0.0194	0.0079	None	0.0129	Other	0.628866	1.63291	Rims1	0.0264	0.0121	0.0101	0.008	0.0071	0.0084	0.0139	0.0096	0.0099	0.0142	0.0131	0.0095	0.00603021	0.00636885	0.00632008	0.00674847	cUMR	1064	3	FALSE	FALSE	mHindlimbsBuds-DS18279 ZhBTc4-DS17616 mHindlimbsBuds-DS18279 mMesoderm-DS18198 ZhBTc4-DS17616	None
chr1	22545016	22545445	74820	M	None	0.0185	0.0133	0.0131	None	0.0136	Other	1.39098	1.03817	Rims1	0.0142	0.0107	0.014	0.0147	0.0134	0.0083	0.0185	0.0153	0.0222	0.0165	0.0093	0.011	0.00603021	0.00636885	0.00632008	0.00674847	None	0	1	FALSE	FALSE	mCJ7-DS13320	None
chr1	22551302	22551876	74822	M	None	0.0182	0.0099	0.0134	None	0.0136	Other	1.83838	1.01493	Rims1	0.0087	0.0111	0.0112	0.0138	0.0143	0.0114	0.02	0.0211	0.0092	0.0141	0.0136	0.0126	0.00603021	0.00636885	0.00632008	0.00674847	None	0	0	FALSE	FALSE		None
chr1	22716182	22716792	74830	M	None	0.0185	0.0119	0.0129	None	0.0157	Other	1.55462	1.21705	Rims1	0.0106	0.0121	0.0149	0.0127	0.0102	0.0158	0.0183	0.0176	0.0203	0.0137	0.0163	0.0199	0.00603021	0.00636885	0.00632008	0.00674847	None	0	1	FALSE	FALSE	mBrain-DS12727	None
chr1	22806349	22806843	74833	M	None	0.0202	0.0123	0.0123	None	0.019	Other	1.64228	1.54472	Rims1	0.0123	0.0157	0.0083	0.0121	0.0152	0.0106	0.0215	0.0206	0.0156	0.0195	0.0232	0.0133	0.00603021	0.00636885	0.00632008	0.00674847	None	0	0	FALSE	FALSE		None
chr1	22809609	22814726	74834	IM	M	0.0246	0.0234	0.012	None	0.0201	AllTSS2	1.05128	1.675	Rims1	0.0287	0.0191	0.0149	0.0123	0.011	0.0123	0.0263	0.0213	0.0231	0.0204	0.0227	0.0166	0.00603021	0.00636885	0.00632008	0.00674847	cUMR	1340	7	FALSE	FALSE	mCerebellum-DS14034 mCerebellum-DS14034 mCerebrum-DS14024 mCerebellum-DS14034 mCerebellum-DS14034 mBrain-DS12727 mESC_F4WT-DS17060 mMesoderm-DS18198 mBrain-DS12727 mESC_FIKO-DS17063 mCerebrum-DS14024 mRetina-DS19060 mCerebellum-DS14034	None
chr1	22814983	22816648	74835	M	None	0.0219	0.014	0.01	None	0.0112	Other	1.56429	1.12	Mir30a	0.0114	0.0174	0.0165	0.0098	0.0107	0.0101	0.0249	0.0158	0.02	0.0109	0.0109	0.0125	0.00603021	0.00636885	0.00632008	0.00674847	None	0	0	FALSE	FALSE		None
chr1	22817835	22818095	74836	M	None	0.0181	0.0153	0.0124	None	0.012	Other	1.18301	0.967742	Mir30a	0.0116	0.0222	0.0164	0.0133	0.0107	0.0112	0.0193	0.0124	0.0208	0.0122	0.0097	0.0138	0.00603021	0.00636885	0.00632008	0.00674847	None	0	0	FALSE	FALSE		None
chr1	22836872	22837123	74837	M	None	0.0171	0.0071	0.0091	None	0.0148	Other	2.40845	1.62637	Mir30a	0.0071	0.0075	0.0065	0.0086	0.0125	0.0076	0.0191	0.0142	0.0146	0.0163	0.0101	0.016	0.00603021	0.00636885	0.00632008	0.00674847	None	0	0	FALSE	FALSE		None
chr1	22838827	22839211	74839	M	None	0.0198	0.0121	0.0137	None	0.0137	Other	1.63636	1	Mir30a	0.0113	0.0092	0.0176	0.0114	0.0158	0.0183	0.0183	0.018	0.0268	0.0148	0.0118	0.0129	0.00603021	0.00636885	0.00632008	0.00674847	None	0	0	FALSE	FALSE		None
chr1	22884393	22884651	74840	M	None	0.0213	0.0124	0.0098	None	0.014	Other	1.71774	1.42857	Mir30a	0.0115	0.0098	0.0179	0.0094	0.0108	0.0101	0.0246	0.02	0.0122	0.0144	0.0109	0.0162	0.00603021	0.00636885	0.00632008	0.00674847	None	0	0	FALSE	FALSE		None
chr1	22885709	22886301	74841	M	None	0.0215	0.011	0.0099	None	0.0126	Other	1.95455	1.27273	Mir30a	0.011	0.0118	0.01	0.0091	0.0099	0.0121	0.0235	0.0178	0.0198	0.0105	0.0138	0.0163	0.00603021	0.00636885	0.00632008	0.00674847	None	0	0	FALSE	FALSE		None
chr1	22946687	22946976	74844	None	M	0.0199	0.0132	0.0134	None	0.0209	Other	1.50758	1.5597	Mir30a	0.0113	0.0166	0.0143	0.0137	0.0123	0.0137	0.0198	0.0162	0.0245	0.0185	0.0258	0.0218	0.00603021	0.00636885	0.00632008	0.00674847	None	0	1	FALSE	FALSE	mCerebrum-DS14024	None
chr1	22964219	22964506	74846	M	None	0.0197	0.0125	0.0124	None	0.0163	Other	1.576	1.31452	Mir30a	0.0091	0.0152	0.0181	0.0132	0.0152	0.0077	0.0211	0.0136	0.0226	0.0136	0.0203	0.0188	0.00603021	0.00636885	0.00632008	0.00674847	None	0	0	FALSE	FALSE		None
chr1	22971433	22971831	74848	M	None	0.0199	0.0137	0.0098	None	0.0164	Other	1.45255	1.67347	Mir30a	0.012	0.0146	0.017	0.0114	0.0053	0.009	0.0216	0.0191	0.0152	0.0154	0.0185	0.0165	0.00603021	0.00636885	0.00632008	0.00674847	None	0	0	FALSE	FALSE		None
chr1	22972035	22972813	74849	M	None	0.0159	0.0155	0.0122	None	0.0153	Other	1.02581	1.2541	Mir30a	0.0155	0.0193	0.0111	0.0109	0.0157	0.0127	0.0169	0.0135	0.0158	0.013	0.0134	0.0229	0.00603021	0.00636885	0.00632008	0.00674847	None	0	0	FALSE	FALSE		None
chr1	22974737	22975160	74850	M	None	0.0201	0.0141	0.0128	None	0.0122	Other	1.42553	0.953125	Mir30a	0.0145	0.015	0.0117	0.0134	0.0111	0.0123	0.0229	0.0181	0.0134	0.0115	0.0143	0.0117	0.00603021	0.00636885	0.00632008	0.00674847	None	0	0	FALSE	FALSE		None
chr1	22975552	22976373	74851	M	M	0.0205	0.0134	0.0109	None	0.0172	Other	1.52985	1.57798	Mir30a	0.0116	0.0133	0.0182	0.0106	0.0133	0.0098	0.0209	0.0221	0.0174	0.0121	0.0267	0.0201	0.00603021	0.00636885	0.00632008	0.00674847	None	0	0	FALSE	FALSE		None
chr1	22979265	22981697	74852	IM	M	0.0197	0.0181	0.0125	None	0.0154	Other	1.0884	1.232	Mir30a	0.0191	0.0173	0.0164	0.0121	0.0143	0.0124	0.0212	0.019	0.0155	0.0146	0.0157	0.0169	0.00603021	0.00636885	0.00632008	0.00674847	None	0	0	FALSE	FALSE		None
chr1	22981706	22982232	74853	M	None	0.0202	0.0137	0.0153	None	0.0171	Other	1.47445	1.11765	Mir30a	0.0156	0.0104	0.0125	0.0155	0.0201	0.0106	0.0222	0.0196	0.0148	0.018	0.0206	0.0109	0.00603021	0.00636885	0.00632008	0.00674847	None	0	1	FALSE	FALSE	mKidney-DS13948	None
chr1	23003409	23004004	74856	M	M	0.018	0.0147	0.0135	None	0.0184	Other	1.22449	1.36296	Mir30a	0.0137	0.0147	0.0171	0.0123	0.0145	0.0161	0.0168	0.0228	0.016	0.0165	0.0203	0.0212	0.00603021	0.00636885	0.00632008	0.00674847	None	0	1	FALSE	FALSE	mLiver-DS14005	None
chr1	23065519	23065906	74857	None	M	0.0145	0.0141	0.0139	None	0.0223	Other	1.02837	1.60432	Mir30a	0.0163	0.009	0.0144	0.0116	0.0189	0.016	0.012	0.0158	0.021	0.0216	0.0232	0.0228	0.00603021	0.00636885	0.00632008	0.00674847	None	0	1	FALSE	FALSE	mLung-DS14479	None
chr1	23068813	23069240	74858	I	I	0.0114	0.0171	0.0243	None	0.0139	Other	0.666667	0.572016	Mir30a	0.0169	0.0173	0.0176	0.0213	0.0331	0.0253	0.0085	0.0169	0.014	0.0087	0.0214	0.019	0.00603021	0.00636885	0.00632008	0.00674847	None	0	1	FALSE	FALSE	mMesoderm-DS18198	None
chr1	23074889	23075430	74859	M	None	0.0192	0.0113	0.0115	None	0.0192	Other	1.69912	1.66957	Mir30a	0.0095	0.0123	0.0146	0.0115	0.012	0.011	0.0163	0.0209	0.0263	0.0191	0.0197	0.019	0.00603021	0.00636885	0.00632008	0.00674847	None	0	1	FALSE	FALSE	mLung-DS14479	None
chr1	23105238	23105896	74860	M	None	0.0194	0.013	0.0088	None	0.014	Other	1.49231	1.59091	Mir30a	0.0101	0.0165	0.0162	0.0086	0.0086	0.0098	0.0208	0.0186	0.0157	0.0123	0.015	0.0171	0.00603021	0.00636885	0.00632008	0.00674847	None	0	2	FALSE	FALSE	mCerebellum-DS14034 mCerebrum-DS14024	None
chr1	23106612	23110612	74861	IM	M	0.0241	0.0208	0.0141	None	0.0205	AllTSS2	1.15865	1.4539	4933415F23Rik	0.022	0.02	0.0186	0.0131	0.0155	0.0158	0.0258	0.0236	0.0191	0.0188	0.0224	0.0228	0.00603021	0.00636885	0.00632008	0.00674847	None	0	3	FALSE	FALSE	mBrain-DS12727 mMuscle_Skeletal-DS18130 mMuscle_Skeletal-DS18130 mCerebrum-DS14024	None
chr1	23111131	23112341	74862	IM	M	0.0179	0.0173	0.0138	None	0.0214	Other	1.03468	1.55072	Mir30a	0.0172	0.0163	0.0187	0.0132	0.0141	0.0154	0.0205	0.0127	0.0159	0.0227	0.0202	0.0196	0.00603021	0.00636885	0.00632008	0.00674847	None	0	2	FALSE	FALSE	mCerebrum-DS14024 mCerebellum-DS14034	None
chr1	23112432	23112683	74863	M	None	0.0212	0.0166	0.0148	None	0.0184	Other	1.27711	1.24324	Mir30a	0.0125	0.0215	0.0213	0.0131	0.019	0.0161	0.0201	0.0201	0.0259	0.0142	0.0245	0.0224	0.00603021	0.00636885	0.00632008	0.00674847	None	0	1	FALSE	FALSE	mfBrain-DS14536	None
chr1	23116552	23117208	74864	IM	M	0.0208	0.0174	0.0098	None	0.0195	Other	1.1954	1.9898	Mir30a	0.0219	0.0077	0.0174	0.0107	0.0055	0.011	0.0217	0.022	0.0165	0.0201	0.018	0.0197	0.00603021	0.00636885	0.00632008	0.00674847	None	0	0	FALSE	FALSE		None
chr1	23117652	23118351	74865	M	None	0.0191	0.0155	0.0134	None	0.0167	Other	1.23226	1.24627	Mir30a	0.014	0.0211	0.0126	0.0139	0.0108	0.014	0.0185	0.0177	0.0227	0.016	0.0156	0.0198	0.00603021	0.00636885	0.00632008	0.00674847	None	0	0	FALSE	FALSE		None
chr1	23118665	23119215	74866	M	None	0.0196	0.0175	0.0146	None	0.0175	Other	1.12	1.19863	Mir30a	0.0135	0.0246	0.0195	0.0139	0.0167	0.0149	0.0216	0.0145	0.0192	0.0125	0.0213	0.0258	0.00603021	0.00636885	0.00632008	0.00674847	None	0	1	FALSE	FALSE	mMesoderm-DS18198	None
chr1	23122628	23122996	74867	M	None	0.0176	0.0176	0.0192	None	0.0171	Other	1	0.890625	Mir30a	0.0193	0.0134	0.0181	0.013	0.0329	0.0253	0.0177	0.0148	0.0207	0.0194	0.0153	0.0132	0.00603021	0.00636885	0.00632008	0.00674847	None	0	2	FALSE	FALSE	m3134-DS8497 mMuscle_Skeletal-DS18130	None
chr1	23139014	23139974	74868	IM	M	0.0217	0.017	0.0166	None	0.0192	Other	1.27647	1.15663	Mir30a	0.0141	0.0194	0.0218	0.0148	0.0253	0.0141	0.0217	0.0193	0.0247	0.0185	0.0213	0.0187	0.00603021	0.00636885	0.00632008	0.00674847	None	0	0	FALSE	FALSE		None
chr1	23140135	23140752	74869	M	None	0.0205	0.0132	0.0137	None	0.0161	Other	1.55303	1.17518	Mir30a	0.0144	0.0105	0.0134	0.0109	0.0169	0.019	0.0214	0.0184	0.02	0.0209	0.0116	0.0087	0.00603021	0.00636885	0.00632008	0.00674847	None	0	0	FALSE	FALSE		None
chr1	23141366	23141864	74870	M	None	0.0206	0.0178	0.0153	None	0.0157	Other	1.1573	1.02614	Mir30a	0.0178	0.0199	0.0155	0.0127	0.0213	0.0177	0.0182	0.0222	0.0266	0.017	0.0147	0.0133	0.00603021	0.00636885	0.00632008	0.00674847	None	0	0	FALSE	FALSE		None
chr1	23181096	23181347	74871	M	None	0.0206	0.0118	0.0171	None	0.0197	Other	1.74576	1.15205	Mir30a	0.0104	0.0118	0.0154	0.0173	0.0172	0.0165	0.0179	0.0228	0.0265	0.0211	0.0198	0.0164	0.00603021	0.00636885	0.00632008	0.00674847	None	0	0	FALSE	FALSE		None
chr1	23185851	23186103	74873	M	None	0.0178	0.0103	0.0122	None	0.0093	Other	1.72816	0.762295	Mir30a	0.01	0.0119	0.0089	0.0129	0.0113	0.0109	0.0154	0.0242	0.0179	0.0086	0.0088	0.0116	0.00603021	0.00636885	0.00632008	0.00674847	None	0	0	FALSE	FALSE		None
chr1	23191464	23192107	74874	IM	None	0.0324	0.0202	0.0154	None	0.0155	Other	1.60396	1.00649	Mir30a	0.0158	0.0259	0.0245	0.0141	0.0128	0.021	0.0159	0.0241	0.0945	0.0115	0.0225	0.0179	0.00603021	0.00636885	0.00632008	0.00674847	None	0	1	FALSE	FALSE	mHeart-DS17909 mHeart-DS17909	None
chr1	23211119	23211766	74875	M	M	0.0187	0.0184	0.0122	None	0.0212	Other	1.0163	1.7377	Mir30a	0.0183	0.0145	0.0231	0.0101	0.0189	0.0125	0.0198	0.018	0.0159	0.0195	0.021	0.0257	0.00603021	0.00636885	0.00632008	0.00674847	None	0	1	FALSE	FALSE	mHeart-DS17909	None
chr1	23235205	23235733	74877	None	I	0.0139	0.0114	0.0218	None	0.0135	Other	1.2193	0.619266	Mir30a	0.0119	0.0101	0.0115	0.0142	0.0255	0.0402	0.0139	0.0145	0.0133	0.013	0.0116	0.0166	0.00603021	0.00636885	0.00632008	0.00674847	None	0	1	FALSE	FALSE	mIntestine_Large-DS19140	None
chr1	23262468	23264277	74878	IM	IM	0.0668	0.0814	0.0618	None	0.0695	AllTSS2	0.820639	1.1246	Mir30a	0.1004	0.055	0.0643	0.0674	0.0389	0.0649	0.0785	0.0539	0.045	0.0684	0.0808	0.0603	0.00603021	0.00636885	0.00632008	0.00674847	cUMR	1633	5	FALSE	FALSE	m3134-DS8497 mHindlimbsBuds-DS18279 mMesoderm-DS18198 mHeart-DS17909 mMuscle_Skeletal-DS18130	None
chr1	23286590	23287067	74879	None	I	0.0104	0.0077	0.0248	None	0.0103	Enhancer4	1.35065	0.415323	Mir30a	0.0058	0.0099	0.01	0.0267	0.022	0.0217	0.0118	0.0059	0.0115	0.0089	0.0106	0.0136	0.00603021	0.00636885	0.00632008	0.00674847	None	0	1	FALSE	FALSE	mHeart-DS17909	None
chr1	23289074	23290014	74880	I	IM	0.0115	0.0208	0.0536	I	0.0166	Enhancer4	0.552885	0.309701	Mir30a	0.0151	0.0247	0.0307	0.0444	0.0582	0.0754	0.0092	0.0152	0.0143	0.0121	0.022	0.0222	0.00603021	0.00636885	0.00632008	0.00674847	None	0	3	FALSE	FALSE	mfLiver-DS19246 mfLiver_DLCR-DS19241 mfLiver_F2-DS20994	None
chr1	23293498	23294151	74881	None	I	0.0056	0.0112	0.0313	None	0.0077	Other	0.5	0.246006	Mir30c-2	0.0114	0.0114	0.0103	0.0278	0.0391	0.0349	0.0073	0.0043	0.0018	0.0076	0.0069	0.0088	0.00603021	0.00636885	0.00632008	0.00674847	None	0	1	FALSE	FALSE	mPATSKI-DS15697	None
chr1	23316250	23316512	74883	M	None	0.019	0.013	0.0118	None	0.0135	Other	1.46154	1.14407	Mir30c-2	0.0145	0.0114	0.0111	0.0094	0.0164	0.0148	0.0186	0.0206	0.0185	0.0131	0.0126	0.0154	0.00603021	0.00636885	0.00632008	0.00674847	None	0	0	FALSE	FALSE		None
chr1	23321575	23322209	74884	None	I	0.0087	0.0082	0.0231	None	0.0107	Other	1.06098	0.463203	Mir30c-2	0.007	0.0085	0.0108	0.0139	0.0292	0.0438	0.0072	0.0099	0.0117	0.0073	0.0168	0.0125	0.00603021	0.00636885	0.00632008	0.00674847	None	0	2	FALSE	FALSE	mLiver-DS14005 MEL-DS13036	None
chr1	23330979	23331539	74885	I	I	0.0096	0.0184	0.0246	None	0.0096	Enhancer4	0.521739	0.390244	Mir30c-2	0.014	0.0272	0.0195	0.0207	0.0359	0.0262	0.0092	0.0133	0.0065	0.0091	0.0105	0.0098	0.00603021	0.00636885	0.00632008	0.00674847	None	0	1	FALSE	FALSE	mBrain-DS12727	None
chr1	23337710	23338103	74886	M	None	0.0216	0.0197	0.0148	None	0.0212	Enhancer4	1.09645	1.43243	Ogfrl1	0.0212	0.0146	0.0221	0.0137	0.0174	0.0156	0.0225	0.0168	0.0243	0.0199	0.0228	0.0228	0.00603021	0.00636885	0.00632008	0.00674847	None	0	0	FALSE	FALSE		None
chr1	23338255	23338750	74887	M	M	0.0216	0.0164	0.0138	None	0.0226	Enhancer4	1.31707	1.63768	Ogfrl1	0.0152	0.0211	0.0137	0.0079	0.0206	0.0248	0.0214	0.0214	0.0224	0.0196	0.0252	0.0275	0.00603021	0.00636885	0.00632008	0.00674847	None	0	0	FALSE	FALSE		None
chr1	23339109	23339561	74888	IM	None	0.0212	0.021	0.0215	None	0.0199	Enhancer4	1.00952	0.925581	Ogfrl1	0.0211	0.0257	0.0151	0.0109	0.035	0.0401	0.0235	0.0187	0.0169	0.0167	0.0215	0.0263	0.00603021	0.00636885	0.00632008	0.00674847	None	0	0	FALSE	FALSE		None
chr1	23342245	23343302	74889	I	IM	0.0181	0.0207	0.0454	None	0.0203	Enhancer4	0.874396	0.447137	Ogfrl1	0.0168	0.031	0.0182	0.0244	0.0713	0.0827	0.0153	0.0242	0.0196	0.0147	0.0254	0.0291	0.00603021	0.00636885	0.00632008	0.00674847	None	0	2	FALSE	FALSE	mGER-DS15420 mfLiver_F2-DS20994	None
chr1	23354165	23354423	74890	M	None	0.0209	0.0149	0.0147	None	0.0165	Other	1.40268	1.12245	Ogfrl1	0.0145	0.0161	0.0148	0.011	0.0192	0.0214	0.0208	0.0218	0.0203	0.0156	0.0126	0.0229	0.00603021	0.00636885	0.00632008	0.00674847	None	0	0	FALSE	FALSE		None
chr1	23358611	23359067	74891	M	None	0.0217	0.0209	0.0141	None	0.0203	Other	1.03828	1.43972	Ogfrl1	0.0245	0.0163	0.0171	0.0131	0.0153	0.016	0.0213	0.0175	0.0283	0.021	0.0199	0.0187	0.00603021	0.00636885	0.00632008	0.00674847	None	0	1	FALSE	FALSE	mGenitalFatPad-DS18780	None
chr1	23363522	23364143	74892	None	M	0.0143	0.0153	0.0141	None	0.0237	Other	0.934641	1.68085	Ogfrl1	0.0152	0.0173	0.0134	0.0126	0.0174	0.0158	0.0132	0.0135	0.0186	0.0279	0.0152	0.0221	0.00603021	0.00636885	0.00632008	0.00674847	None	0	0	FALSE	FALSE		None
chr1	23384146	23384984	74894	IM	M	0.0193	0.0223	0.0154	None	0.0196	Other	0.865471	1.27273	Ogfrl1	0.0251	0.0206	0.0171	0.0148	0.0162	0.0163	0.0184	0.021	0.0201	0.0197	0.0185	0.0205	0.00603021	0.00636885	0.00632008	0.00674847	None	0	1	FALSE	FALSE	mBrain-DS12727	None
chr1	23385125	23385664	74895	I	None	0.0169	0.0226	0.0141	None	0.0206	Other	0.747788	1.46099	Ogfrl1	0.0196	0.0298	0.0217	0.0116	0.0208	0.0155	0.0163	0.0193	0.0162	0.017	0.0245	0.0252	0.00603021	0.00636885	0.00632008	0.00674847	None	0	0	FALSE	FALSE		None
chr1	23386158	23392113	74896	IM	IM	0.0432	0.054	0.0388	None	0.0351	AllTSS2	0.8	0.904639	Ogfrl1	0.0596	0.0505	0.0438	0.0435	0.0251	0.0373	0.051	0.0313	0.0326	0.0325	0.0401	0.0363	0.00603021	0.00636885	0.00632008	0.00674847	cUMR	1669	11	FALSE	FALSE	mfBrain-DS14536 mCerebellum-DS14034 mfBrain-DS14536 mCerebrum-DS14024 mfLiver_F1-DS20991 mGER-DS15410 mGER-DS15400 mRetina-DS20000 mRetina-DS19060 mfLiver_F5-DS20999 mGER-DS15410 mCerebellum-DS14034 mFatPad-DS14021 mRetina-DS19060 mGER-DS15420	None
chr1	23392860	23393823	74897	M	None	0.0244	0.0161	0.0133	None	0.0137	Other	1.51553	1.03008	Ogfrl1	0.0135	0.0215	0.0165	0.0144	0.0103	0.0129	0.0298	0.016	0.0174	0.0132	0.0113	0.0175	0.00603021	0.00636885	0.00632008	0.00674847	None	0	0	FALSE	FALSE		None
chr1	23394301	23394623	74898	M	None	0.0205	0.0176	0.0145	None	0.0179	Other	1.16477	1.23448	Ogfrl1	0.0156	0.0196	0.0204	0.0161	0.0144	0.01	0.0245	0.0139	0.0157	0.0171	0.0181	0.0198	0.00603021	0.00636885	0.00632008	0.00674847	None	0	0	FALSE	FALSE		None
chr1	23406117	23406902	74900	None	I	0.0107	0.0137	0.036	None	0.0152	Enhancer4	0.781022	0.422222	Ogfrl1	0.0127	0.0159	0.0135	0.0248	0.0473	0.0579	0.0104	0.0096	0.0128	0.0098	0.0213	0.0223	0.00603021	0.00636885	0.00632008	0.00674847	None	0	2	FALSE	FALSE	mTN-DS16171 mATr-DS20149	None
chr1	23433000	23433770	74901	I	IM	0.0164	0.0192	0.0236	None	0.0231	Other	0.854167	0.978814	Ogfrl1	0.0203	0.0179	0.0178	0.0126	0.0396	0.0411	0.0156	0.0191	0.0158	0.0216	0.0266	0.0233	0.00603021	0.00636885	0.00632008	0.00674847	None	0	1	FALSE	FALSE	mfLiver_F5-DS20999 mfLiver_F5-DS20999	None
chr1	23502240	23502808	74902	None	I	0.009	0.0107	0.0208	None	0.0091	Other	0.841121	0.4375	Ogfrl1	0.0115	0.01	0.0095	0.0179	0.0347	0.0173	0.0094	0.0086	0.0084	0.0106	0.0073	0.0072	0.00603021	0.00636885	0.00632008	0.00674847	None	0	1	FALSE	FALSE	mGER-DS15420	None
chr1	23521978	23523125	74903	M	M	0.0184	0.0139	0.0118	None	0.0184	Other	1.32374	1.55932	Ogfrl1	0.0145	0.0142	0.0119	0.0113	0.0136	0.0115	0.0163	0.0184	0.025	0.0177	0.0191	0.0195	0.00603021	0.00636885	0.00632008	0.00674847	None	0	0	FALSE	FALSE		None
chr1	23524471	23524983	74904	M	None	0.0193	0.0168	0.0167	None	0.0191	Other	1.14881	1.14371	Ogfrl1	0.0172	0.0178	0.0148	0.0167	0.016	0.0172	0.0184	0.0174	0.0246	0.0168	0.0179	0.0261	0.00603021	0.00636885	0.00632008	0.00674847	None	0	0	FALSE	FALSE		None
chr1	23529596	23530372	74905	M	None	0.0204	0.01	0.0152	None	0.0121	Other	2.04	0.796053	Ogfrl1	0.0085	0.0094	0.0146	0.0139	0.0178	0.0167	0.0234	0.0112	0.0218	0.0109	0.0113	0.016	0.00603021	0.00636885	0.00632008	0.00674847	None	0	1	FALSE	FALSE	mGER-DS15400	None
chr1	23531036	23531362	74906	M	None	0.0179	0.01	0.0111	None	0.0117	Other	1.79	1.05405	Ogfrl1	0.0118	0.0086	0.0069	0.0102	0.0118	0.0131	0.018	0.0179	0.0175	0.0126	0.01	0.0112	0.00603021	0.00636885	0.00632008	0.00674847	None	0	1	FALSE	FALSE	E14-DS21450	None
chr1	23531366	23531617	74907	M	None	0.0179	0.0133	0.0136	None	0.0159	Other	1.34586	1.16912	Ogfrl1	0.0129	0.0155	0.0117	0.0133	0.0125	0.0157	0.0193	0.0142	0.018	0.0187	0.0137	0.0112	0.00603021	0.00636885	0.00632008	0.00674847	None	0	1	FALSE	FALSE	mESC_FIKO-DS17063	None
chr1	23534398	23534929	74908	M	None	0.018	0.0131	0.0143	None	0.0151	Other	1.37405	1.05594	Ogfrl1	0.0142	0.01	0.0139	0.0134	0.0157	0.016	0.0168	0.0167	0.0235	0.016	0.0138	0.0141	0.00603021	0.00636885	0.00632008	0.00674847	None	0	0	FALSE	FALSE		None
chr1	23540980	23542251	74909	IM	None	0.0212	0.0167	0.012	M	0.007	Other	1.26946	0.583333	Ogfrl1	0.0151	0.0189	0.0183	0.0123	0.0103	0.0128	0.0237	0.0173	0.018	0.0063	0.0089	0.0067	0.00603021	0.00636885	0.00632008	0.00674847	None	0	1	FALSE	FALSE	mGER-DS15420	None
chr1	23543246	23543916	74910	M	None	0.0197	0.0134	0.0107	None	0.0105	Other	1.47015	0.981308	Ogfrl1	0.0107	0.0173	0.0157	0.0078	0.0152	0.0149	0.0196	0.0203	0.0196	0.0107	0.0088	0.012	0.00603021	0.00636885	0.00632008	0.00674847	None	0	1	FALSE	FALSE	mA20-DS16695	None
chr1	23544370	23545612	74911	IM	M	0.0206	0.0159	0.0129	None	0.0195	Other	1.2956	1.51163	Ogfrl1	0.017	0.0142	0.015	0.012	0.0147	0.0138	0.0198	0.0229	0.0203	0.0198	0.0176	0.0209	0.00603021	0.00636885	0.00632008	0.00674847	None	0	2	FALSE	FALSE	mGER-DS15400 mfBrain-DS14536	None
chr1	23545702	23546058	74912	M	None	0.02	0.0155	0.012	None	0.0187	Other	1.29032	1.55833	Ogfrl1	0.0154	0.0132	0.0183	0.0114	0.0135	0.0125	0.0204	0.0215	0.017	0.0218	0.0166	0.0129	0.00603021	0.00636885	0.00632008	0.00674847	None	0	0	FALSE	FALSE		None
chr1	23547108	23547788	74913	M	M	0.018	0.0188	0.0162	None	0.0202	Other	0.957447	1.24691	Ogfrl1	0.016	0.0224	0.0219	0.015	0.0162	0.0196	0.0177	0.0185	0.0185	0.0196	0.0236	0.0183	0.00603021	0.00636885	0.00632008	0.00674847	None	0	1	FALSE	FALSE	mKidney-DS13948	None
chr1	23548153	23548740	74914	M	None	0.0189	0.0177	0.0129	None	0.019	Other	1.0678	1.47287	Ogfrl1	0.0175	0.0186	0.0172	0.0116	0.0146	0.0151	0.016	0.0211	0.0254	0.0186	0.0195	0.0197	0.00603021	0.00636885	0.00632008	0.00674847	None	0	0	FALSE	FALSE		None
chr1	23549094	23549831	74915	IM	M	0.02	0.0182	0.0155	None	0.0185	Other	1.0989	1.19355	Ogfrl1	0.0187	0.0143	0.0214	0.017	0.0135	0.0133	0.0174	0.0226	0.0249	0.0181	0.0214	0.0165	0.00603021	0.00636885	0.00632008	0.00674847	None	0	0	FALSE	FALSE		None
chr1	23550214	23550652	74916	M	M	0.0207	0.0142	0.012	None	0.0187	Other	1.45775	1.55833	Ogfrl1	0.0137	0.0154	0.0141	0.011	0.0148	0.0126	0.0206	0.0229	0.0184	0.0191	0.0188	0.0177	0.00603021	0.00636885	0.00632008	0.00674847	None	0	0	FALSE	FALSE		None
chr1	23582495	23582946	74917	M	None	0.0203	0.0164	0.0147	None	0.0115	Other	1.2378	0.782313	Ogfrl1	0.0152	0.0218	0.0129	0.0156	0.0096	0.0162	0.0216	0.021	0.0153	0.0075	0.0157	0.0171	0.00603021	0.00636885	0.00632008	0.00674847	None	0	1	FALSE	FALSE	mFibroblast-DS10088	None
chr1	23599393	23600381	74918	M	None	0.0214	0.0157	0.0155	None	0.019	Other	1.36306	1.22581	Ogfrl1	0.0155	0.0149	0.0174	0.0147	0.0186	0.0153	0.0188	0.0256	0.0245	0.0199	0.0179	0.0181	0.00603021	0.00636885	0.00632008	0.00674847	None	0	0	FALSE	FALSE		None
chr1	23609043	23609956	74921	IM	M	0.0229	0.0169	0.015	None	0.0193	Other	1.35503	1.28667	Ogfrl1	0.0165	0.0183	0.0164	0.0141	0.0159	0.0167	0.0247	0.0213	0.0191	0.0176	0.0225	0.02	0.00603021	0.00636885	0.00632008	0.00674847	None	0	1	FALSE	FALSE	CH12-DS22542	None
chr1	23610938	23611340	74922	I	None	0.02	0.02	0.0106	None	0.0206	Other	1	1.9434	Ogfrl1	0.0224	0.0161	0.0181	0.0101	0.0136	0.0093	0.0221	0.0166	0.0173	0.0194	0.0224	0.022	0.00603021	0.00636885	0.00632008	0.00674847	None	0	0	FALSE	FALSE		None
chr1	23661944	23662195	74923	M	None	0.021	0.0155	0.0123	None	0.0142	Other	1.35484	1.15447	Smap1	0.0148	0.0151	0.0174	0.0102	0.0179	0.0137	0.0217	0.0213	0.0186	0.012	0.016	0.0175	0.00603021	0.00636885	0.00632008	0.00674847	None	0	0	FALSE	FALSE		None
chr1	23667443	23667962	74925	M	None	0.0204	0.0142	0.0149	None	0.0162	Other	1.43662	1.08725	Smap1	0.0128	0.0165	0.0149	0.0159	0.0138	0.0128	0.0214	0.0163	0.0223	0.0162	0.0163	0.0164	0.00603021	0.00636885	0.00632008	0.00674847	None	0	0	FALSE	FALSE		None
chr1	23681019	23681542	74927	IM	M	0.0194	0.0209	0.017	None	0.0232	Other	0.92823	1.36471	Smap1	0.0267	0.013	0.0152	0.0156	0.0143	0.0231	0.0176	0.0228	0.0212	0.0237	0.0188	0.0268	0.00603021	0.00636885	0.00632008	0.00674847	None	0	0	FALSE	FALSE		None
chr1	23710230	23710799	74928	M	None	0.0222	0.0152	0.0152	None	0.0203	Other	1.46053	1.33553	Smap1	0.0146	0.015	0.0172	0.0136	0.0152	0.0195	0.0187	0.0262	0.0287	0.0183	0.0195	0.0261	0.00603021	0.00636885	0.00632008	0.00674847	None	0	0	FALSE	FALSE		None
chr1	23712150	23712910	74929	I	IM	0.0206	0.0271	0.028	None	0.0249	Other	0.760148	0.889286	Smap1	0.0293	0.0214	0.0282	0.0302	0.023	0.0262	0.0173	0.0242	0.0267	0.0236	0.0264	0.0267	0.00603021	0.00636885	0.00632008	0.00674847	None	0	2	FALSE	FALSE	mCD19-DS16168 CH12-DS22542 mCD19-DS16168	None
chr1	23765402	23771161	74930	IM	IM	0.0346	0.0358	0.0148	None	0.0269	AllTSS2	0.96648	1.81757	B3gat2	0.0439	0.0284	0.024	0.0151	0.011	0.0171	0.0369	0.0323	0.0302	0.0221	0.0373	0.0282	0.00603021	0.00636885	0.00632008	0.00674847	cUMR	2102	6	FALSE	FALSE	mKidney-DS13948 mMesoderm-DS18198 mHindlimbsBuds-DS18279 mKidney-DS13948 mMesoderm-DS18198 mMesoderm-DS18198 mMesoderm-DS18198 mMesoderm-DS18198 mESC_FIKO-DS17063 mESC_F4WT-DS17060 ZhBTc4-DS17562	None
chr1	23771502	23771790	74931	M	None	0.022	0.0181	0.012	None	0.0154	Other	1.21547	1.28333	B3gat2	0.0146	0.0272	0.0162	0.0126	0.0116	0.0106	0.0278	0.0154	0.0117	0.012	0.017	0.022	0.00603021	0.00636885	0.00632008	0.00674847	None	0	1	FALSE	FALSE	mfBrain-DS14536	None
chr1	23773775	23774545	74932	M	None	0.0228	0.02	0.0139	None	0.0169	Other	1.14	1.21583	B3gat2	0.0185	0.0256	0.0171	0.0146	0.017	0.0094	0.0243	0.0191	0.0226	0.0176	0.0168	0.0154	0.00603021	0.00636885	0.00632008	0.00674847	None	0	1	FALSE	FALSE	mCD19-DS16168	None
chr1	23782798	23783457	74933	M	M	0.0225	0.0199	0.0152	None	0.0256	Other	1.13065	1.68421	B3gat2	0.0188	0.0189	0.024	0.0138	0.0165	0.0183	0.0225	0.0218	0.0233	0.0264	0.0267	0.0225	0.00603021	0.00636885	0.00632008	0.00674847	None	0	2	FALSE	FALSE	mKidney-DS13948 mCerebrum-DS14024	None
chr1	23797458	23797725	74934	M	None	0.0198	0.0182	0.0093	None	0.0156	Other	1.08791	1.67742	B3gat2	0.0185	0.0196	0.0159	0.0089	0.0106	0.0096	0.0197	0.0115	0.03	0.0121	0.0237	0.0159	0.00603021	0.00636885	0.00632008	0.00674847	None	0	0	FALSE	FALSE		None
chr1	23799437	23800146	74935	IM	IM	0.0207	0.03	0.0359	None	0.021	Other	0.69	0.584958	B3gat2	0.0275	0.0324	0.0335	0.0374	0.0303	0.0362	0.019	0.0223	0.0244	0.0168	0.0308	0.0211	0.00603021	0.00636885	0.00632008	0.00674847	None	0	1	FALSE	FALSE	mMesoderm-DS18198	None
chr1	23833092	23835481	74936	IM	IM	0.0251	0.0343	0.0459	None	0.0319	Other	0.731778	0.694989	B3gat2	0.0326	0.0357	0.0372	0.0515	0.0297	0.0436	0.0225	0.0286	0.0293	0.0286	0.0368	0.0348	0.00603021	0.00636885	0.00632008	0.00674847	None	0	6	FALSE	FALSE	mGER-DS15400 mGER-DS15410 mPATSKI-DS15697 mA20-DS16695 mA20-DS16695 mfBrain-DS14536 m416B-DS14099	None
chr1	23835967	23837056	74937	M	M	0.0237	0.0231	0.0226	None	0.0253	Enhancer4	1.02597	1.11947	B3gat2	0.0258	0.0199	0.0198	0.024	0.0167	0.0236	0.0214	0.0294	0.0241	0.0251	0.03	0.0211	0.00603021	0.00636885	0.00632008	0.00674847	None	0	1	FALSE	FALSE	mESC_F4WT-DS17060	None
chr1	23841735	23842374	74938	IM	M	0.0284	0.0229	0.0237	None	0.0234	Enhancer4	1.24017	0.987342	B3gat2	0.0213	0.0271	0.0219	0.0258	0.0248	0.017	0.0221	0.0202	0.0579	0.02	0.0327	0.0222	0.00603021	0.00636885	0.00632008	0.00674847	None	0	1	FALSE	FALSE	mfBrain-DS14536	None
chr1	23843200	23844294	74939	I	I	0.0149	0.0196	0.0428	I	0.0194	Enhancer4	0.760204	0.453271	B3gat2	0.0168	0.0243	0.0213	0.0486	0.0342	0.0338	0.0144	0.0155	0.0158	0.017	0.0209	0.0239	0.00603021	0.00636885	0.00632008	0.00674847	None	0	2	FALSE	FALSE	mGER-DS15400 MEL-DS13036	None
chr1	23844392	23844751	74940	None	I	0.0174	0.0178	0.0283	None	0.0206	Enhancer4	0.977528	0.727915	B3gat2	0.0137	0.0184	0.0274	0.0312	0.0233	0.0243	0.0181	0.018	0.0146	0.0233	0.0167	0.0181	0.00603021	0.00636885	0.00632008	0.00674847	None	0	0	FALSE	FALSE		None
chr1	23848605	23848879	74941	I	None	0.0158	0.0237	0.0235	None	0.0169	Enhancer4	0.666667	0.719149	B3gat2	0.0271	0.0175	0.0224	0.0242	0.0212	0.0233	0.0157	0.0146	0.0176	0.0142	0.0262	0.014	0.00603021	0.00636885	0.00632008	0.00674847	None	0	2	FALSE	FALSE	mCJ7-DS13320 mA20-DS16695	None
chr1	23903794	23904345	74942	None	I	0.0178	0.0177	0.0295	None	0.0201	Enhancer4	1.00565	0.681356	Smap1	0.0161	0.0159	0.0237	0.0302	0.0265	0.0301	0.0156	0.0188	0.0232	0.0141	0.0239	0.0308	0.00603021	0.00636885	0.00632008	0.00674847	None	0	2	FALSE	FALSE	mMesoderm-DS18198 mCerebrum-DS14024	None
chr1	23905615	23907102	74943	I	IM	0.0158	0.0182	0.0609	I	0.0201	Enhancer4	0.868132	0.330049	Smap1	0.0158	0.022	0.0199	0.0637	0.0491	0.0626	0.0172	0.0139	0.0136	0.0145	0.0236	0.0303	0.00603021	0.00636885	0.00632008	0.00674847	None	0	2	FALSE	FALSE	MEL-DS13036 MEL-DS13036 mfLiver_F5-DS20999	None
chr1	23910075	23910578	74944	None	I	0.0158	0.0183	0.028	None	0.0166	Enhancer4	0.863388	0.592857	Smap1	0.0146	0.0273	0.0171	0.0279	0.0214	0.0337	0.0148	0.0161	0.0185	0.0156	0.016	0.0197	0.00603021	0.00636885	0.00632008	0.00674847	None	0	2	FALSE	FALSE	mGER-DS15420 mESC_FIKO-DS17063	None
chr1	23912790	23913393	74945	None	I	0.0132	0.014	0.0328	None	0.012	Enhancer4	0.942857	0.365854	Smap1	0.0104	0.0249	0.0103	0.0386	0.0294	0.0191	0.0128	0.0174	0.0092	0.0098	0.0138	0.0153	0.00603021	0.00636885	0.00632008	0.00674847	None	0	1	FALSE	FALSE	mTN-DS16171	None
chr1	23922096	23922935	74946	None	I	0.0077	0.0157	0.0393	I	0.0117	Enhancer4	0.490446	0.29771	Smap1	0.0155	0.0186	0.0125	0.0439	0.0334	0.0312	0.0081	0.0061	0.008	0.0116	0.0086	0.0154	0.00603021	0.00636885	0.00632008	0.00674847	None	0	2	FALSE	FALSE	MEL-DS13036 mGER-DS15420	None
chr1	23923664	23924274	74947	None	I	0.0118	0.0204	0.0314	I	0.0142	Enhancer4	0.578431	0.452229	Smap1	0.0194	0.0204	0.023	0.0357	0.0213	0.028	0.012	0.0123	0.0105	0.0155	0.0117	0.0134	0.00603021	0.00636885	0.00632008	0.00674847	None	0	2	FALSE	FALSE	mGER-DS15420 mTR-DS17864	None
chr1	23927057	23927720	74948	None	I	0.0169	0.0151	0.0335	None	0.0142	Enhancer4	1.11921	0.423881	Smap1	0.0161	0.0155	0.0121	0.0377	0.025	0.0285	0.0204	0.0151	0.0081	0.0122	0.0147	0.0186	0.00603021	0.00636885	0.00632008	0.00674847	cUMR	2233	3	FALSE	FALSE	mPATSKI-DS15697 mGER-DS15410 mIntestine_Large-DS19140	None
chr1	23928182	23929727	74949	IM	IM	0.0626	0.084	0.0675	I	0.0469	AllTSS2	0.745238	0.694815	Smap1	0.1039	0.0634	0.0574	0.0844	0.0295	0.052	0.0788	0.0387	0.0395	0.054	0.0413	0.0353	0.00603021	0.00636885	0.00632008	0.00674847	cUMR	2233	5	FALSE	FALSE	mGER-DS15410 mPATSKI-DS15697 mfLiver_F3-DS20937 mNIH_3T3-DS16900 mfLiver_F3-DS20937 mfLiver-DS19246	None
chr1	23930310	23931758	74950	IM	IM	0.02	0.0226	0.0619	I	0.0224	Enhancer4	0.884956	0.361874	Smap1	0.0175	0.0307	0.0263	0.0728	0.0414	0.0483	0.0233	0.0164	0.0138	0.0162	0.0305	0.0294	0.00603021	0.00636885	0.00632008	0.00674847	None	0	3	FALSE	FALSE	mFatPad-DS14021 mGenitalFatPad-DS18780 m416B-DS14099 m416B-DS14099 m416B-DS14099	None
chr1	23936030	23936662	74951	None	I	0.0102	0.0141	0.0314	None	0.0128	Enhancer4	0.723404	0.407643	Smap1	0.0143	0.0135	0.0145	0.0373	0.0256	0.0197	0.0091	0.011	0.0129	0.0089	0.0192	0.0157	0.00603021	0.00636885	0.00632008	0.00674847	None	0	1	FALSE	FALSE	CH12-DS22542	None
chr1	23940920	23941435	74952	IM	None	0.0163	0.0173	0.0114	None	0.0144	Other	0.942197	1.26316	Smap1	0.0143	0.0195	0.022	0.0119	0.0099	0.0112	0.0112	0.0235	0.0238	0.0125	0.0186	0.0146	0.00603021	0.00636885	0.00632008	0.00674847	None	0	0	FALSE	FALSE		None
chr1	23941629	23942533	74953	IM	IM	0.0268	0.0293	0.0224	None	0.0248	Other	0.914676	1.10714	Smap1	0.0332	0.0237	0.0259	0.0225	0.0186	0.0253	0.0237	0.0315	0.0312	0.0216	0.0307	0.0269	0.00603021	0.00636885	0.00632008	0.00674847	None	0	2	FALSE	FALSE	mCerebrum-DS14024 mCerebrum-DS14024 CH12-DS22542	None
chr1	23942802	23943056	74954	M	None	0.0206	0.0213	0.0184	None	0.0174	Other	0.967136	0.945652	Smap1	0.0196	0.0207	0.0266	0.0202	0.0188	0.013	0.014	0.032	0.0279	0.0132	0.0165	0.0288	0.00603021	0.00636885	0.00632008	0.00674847	None	0	0	FALSE	FALSE		None
chr1	23949408	23950016	74955	M	None	0.0198	0.0154	0.0169	None	0.0148	Other	1.28571	0.87574	Smap1	0.0133	0.0209	0.0144	0.0179	0.0152	0.0155	0.0177	0.0193	0.0273	0.0135	0.0225	0.0101	0.00603021	0.00636885	0.00632008	0.00674847	None	0	0	FALSE	FALSE		None
chr1	23954011	23954462	74956	M	None	0.0207	0.0212	0.0184	None	0.0168	Other	0.976415	0.913043	Smap1	0.0201	0.0177	0.0282	0.016	0.0254	0.0194	0.0209	0.0198	0.021	0.0153	0.0221	0.0149	0.00603021	0.00636885	0.00632008	0.00674847	None	0	1	FALSE	FALSE	mGenitalFatPad-DS18780	None
chr1	23960833	23961158	74957	I	None	0.0179	0.0235	0.0129	None	0.0193	Other	0.761702	1.49612	Smap1	0.0209	0.0337	0.018	0.0105	0.0139	0.0187	0.0141	0.0261	0.0203	0.0196	0.0164	0.0217	0.00603021	0.00636885	0.00632008	0.00674847	None	0	2	FALSE	FALSE	mCerebrum-DS14024 mKidney-DS13948	None
chr1	23962853	23963489	74958	M	None	0.0235	0.0198	0.0179	None	0.0177	Other	1.18687	0.988827	Smap1	0.0224	0.0175	0.0158	0.0177	0.017	0.0193	0.0218	0.023	0.0295	0.0172	0.0228	0.0135	0.00603021	0.00636885	0.00632008	0.00674847	None	0	0	FALSE	FALSE		None
chr1	23972866	23973485	74959	I	None	0.011	0.0225	0.0161	None	0.0157	Other	0.488889	0.975155	1110058L19Rik	0.0235	0.0248	0.0173	0.0143	0.023	0.0155	0.009	0.0147	0.013	0.015	0.0161	0.0168	0.00603021	0.00636885	0.00632008	0.00674847	None	0	1	FALSE	FALSE	mGER-DS15420	None
chr1	23974910	23976244	74960	IM	M	0.0204	0.0233	0.0153	None	0.0242	Other	0.875536	1.5817	1110058L19Rik	0.0288	0.0137	0.0206	0.0157	0.0139	0.0155	0.0188	0.0204	0.0251	0.0277	0.024	0.0156	0.00603021	0.00636885	0.00632008	0.00674847	None	0	3	FALSE	FALSE	mfLiver_DLCR-DS19241 mCJ7-DS13320 mRetina-DS19060	None
chr1	23976777	23977496	74961	IM	M	0.0231	0.0218	0.0145	None	0.025	Other	1.05963	1.72414	1110058L19Rik	0.0219	0.0199	0.0236	0.0141	0.0142	0.0162	0.0228	0.0228	0.0245	0.022	0.0263	0.0308	0.00603021	0.00636885	0.00632008	0.00674847	None	0	3	FALSE	FALSE	mCerebrum-DS14024 mCJ7-DS13320 ZhBTc4-DS15236	None
chr1	24005608	24006106	74962	I	None	0.009	0.0216	0.0146	None	0.0123	Enhancer4	0.416667	0.842466	1110058L19Rik	0.022	0.0181	0.0247	0.0164	0.0151	0.0092	0.0086	0.0111	0.008	0.0148	0.0092	0.0094	0.00603021	0.00636885	0.00632008	0.00674847	None	0	0	FALSE	FALSE		None
chr1	24012006	24012979	74963	IM	IM	0.0233	0.0592	0.0729	None	0.0306	AllTSS2	0.393581	0.419753	1110058L19Rik	0.067	0.0417	0.06	0.0781	0.0559	0.0723	0.0221	0.0289	0.0205	0.0223	0.0479	0.0329	0.00603021	0.00636885	0.00632008	0.00674847	None	0	4	FALSE	FALSE	mfLiver_F5-DS20999 mCerebrum-DS14024 m3134-DS8497 mCerebellum-DS14034	None
chr1	24022953	24023482	74964	M	M	0.018	0.0148	0.0131	None	0.0235	Other	1.21622	1.79389	Fam135a	0.0163	0.0121	0.0142	0.0151	0.0061	0.0135	0.0161	0.0211	0.0205	0.0247	0.0152	0.0291	0.00603021	0.00636885	0.00632008	0.00674847	None	0	0	FALSE	FALSE		None
chr1	24040643	24041481	74965	None	I	0.0114	0.014	0.0317	None	0.0111	Other	0.814286	0.350158	Fam135a	0.0123	0.0184	0.013	0.0337	0.031	0.0266	0.0121	0.01	0.0109	0.0087	0.0124	0.0159	0.00603021	0.00636885	0.00632008	0.00674847	None	0	1	FALSE	FALSE	mCerebrum-DS14024 mCerebrum-DS14024	None
chr1	24063333	24063811	74966	M	None	0.0196	0.0139	0.0132	None	0.0178	Other	1.41007	1.34848	Fam135a	0.0141	0.0106	0.0169	0.0099	0.0157	0.0204	0.021	0.0123	0.0238	0.0175	0.0159	0.0203	0.00603021	0.00636885	0.00632008	0.00674847	None	0	1	FALSE	FALSE	mIntestine_Large-DS19140	None
chr1	24106338	24107696	74967	I	None	0.0175	0.0251	0.0108	None	0.0145	AllTSS2	0.697211	1.34259	Fam135a	0.0355	0.0136	0.0121	0.0127	0.0073	0.0084	0.0191	0.0143	0.0165	0.0178	0.011	0.0099	0.00603021	0.00636885	0.00632008	0.00674847	cUMR	1608	5	FALSE	FALSE	mMesoderm-DS18198 mNIH_3T3-DS16900 m3134-DS8497 E14-DS21450 mRetina-DS19060	None
chr1	24109408	24110342	74968	M	M	0.0189	0.0175	0.0131	None	0.0176	Other	1.08	1.34351	Fam135a	0.0178	0.0151	0.0196	0.0132	0.0127	0.0132	0.0194	0.0208	0.0148	0.0161	0.0226	0.0162	0.00603021	0.00636885	0.00632008	0.00674847	None	0	3	FALSE	FALSE	mIntestine_Large-DS19140 mPATSKI-DS15697 mA20-DS16695	None
chr1	24110757	24111999	74969	M	None	0.0204	0.017	0.0146	None	0.0184	Other	1.2	1.26027	Fam135a	0.0158	0.0215	0.0148	0.0151	0.0137	0.0139	0.0212	0.0235	0.0144	0.0162	0.0231	0.019	0.00603021	0.00636885	0.00632008	0.00674847	None	0	1	FALSE	FALSE	mA20-DS16695	None
chr1	24114224	24114688	74970	I	None	0.0155	0.0199	0.0125	None	0.0186	Other	0.778894	1.488	Fam135a	0.0187	0.0232	0.0194	0.0126	0.0155	0.0098	0.0172	0.0115	0.0149	0.017	0.021	0.0202	0.00603021	0.00636885	0.00632008	0.00674847	None	0	2	FALSE	FALSE	mPATSKI-DS15697 mESC_FIKO-DS17063	None
chr1	24114881	24115709	74971	IM	None	0.0213	0.0187	0.0172	None	0.0197	Other	1.13904	1.14535	Fam135a	0.0192	0.0205	0.0153	0.0172	0.0165	0.0179	0.0224	0.0182	0.0217	0.0175	0.0186	0.0262	0.00603021	0.00636885	0.00632008	0.00674847	None	0	3	FALSE	FALSE	mPATSKI-DS15697 CH12-DS22542 mLiver-DS14005	None
chr1	24127810	24128125	74972	M	None	0.0206	0.0141	0.0122	None	0.0148	Other	1.46099	1.21311	Fam135a	0.0139	0.0145	0.0141	0.0146	0.0082	0.0086	0.0214	0.0237	0.0141	0.0178	0.0132	0.0089	0.00603021	0.00636885	0.00632008	0.00674847	None	0	0	FALSE	FALSE		None
chr1	24132059	24132579	74974	M	None	0.0207	0.0146	0.0105	None	0.0105	Other	1.41781	1	Fam135a	0.0141	0.0137	0.0169	0.0089	0.0134	0.0128	0.0207	0.0192	0.0221	0.0088	0.0117	0.0134	0.00603021	0.00636885	0.00632008	0.00674847	None	0	0	FALSE	FALSE		None
chr1	24132648	24133372	74975	M	None	0.022	0.0149	0.0117	None	0.0145	Other	1.47651	1.23932	Fam135a	0.0122	0.0155	0.0212	0.0107	0.0125	0.014	0.0194	0.0219	0.0304	0.0161	0.0124	0.0126	0.00603021	0.00636885	0.00632008	0.00674847	None	0	0	FALSE	FALSE		None
chr1	24133637	24134242	74976	M	None	0.0205	0.0159	0.0135	None	0.0175	Other	1.28931	1.2963	Fam135a	0.0131	0.0228	0.0146	0.0142	0.0118	0.0129	0.0218	0.0177	0.0195	0.0171	0.0206	0.0153	0.00603021	0.00636885	0.00632008	0.00674847	None	0	0	FALSE	FALSE		None
chr1	24141672	24142178	74977	None	I	0.0063	0.0136	0.0223	None	0.0104	Other	0.463235	0.466368	Fam135a	0.0093	0.0212	0.0159	0.0228	0.0304	0.0145	0.0052	0.0073	0.0083	0.0067	0.0143	0.0156	0.00603021	0.00636885	0.00632008	0.00674847	None	0	1	FALSE	FALSE	mPATSKI-DS15697	None
chr1	24143855	24144545	74978	IM	IM	0.0161	0.0198	0.027	None	0.0179	Other	0.813131	0.662963	Fam135a	0.0197	0.0192	0.0207	0.0269	0.0388	0.0175	0.0155	0.0157	0.0186	0.0181	0.021	0.0142	0.00603021	0.00636885	0.00632008	0.00674847	None	0	1	FALSE	FALSE	mPATSKI-DS15697	None
chr1	24178190	24178760	74979	None	I	0.0111	0.0171	0.0242	None	0.0111	Other	0.649123	0.458678	Fam135a	0.0169	0.0169	0.0176	0.0199	0.0295	0.0318	0.0087	0.0097	0.0204	0.0102	0.0086	0.0159	0.00603021	0.00636885	0.00632008	0.00674847	None	0	1	FALSE	FALSE	mPATSKI-DS15697	None
chr1	24181357	24181814	74980	M	None	0.0212	0.0143	0.0117	None	0.015	Other	1.48252	1.28205	Fam135a	0.0153	0.0103	0.0164	0.0122	0.0106	0.0111	0.0222	0.0209	0.0183	0.0145	0.0164	0.0148	0.00603021	0.00636885	0.00632008	0.00674847	None	0	0	FALSE	FALSE		None
chr1	24183542	24184855	74981	M	None	0.0217	0.0181	0.0146	None	0.02	AllTSS2	1.1989	1.36986	Col9a1	0.0169	0.0171	0.0223	0.0147	0.0114	0.0172	0.0211	0.022	0.0233	0.0221	0.0168	0.0182	0.00603021	0.00636885	0.00632008	0.00674847	None	0	0	FALSE	FALSE		None
chr1	24185341	24185727	74982	M	None	0.0208	0.0161	0.0153	None	0.019	Other	1.29193	1.24183	Col9a1	0.0181	0.0145	0.013	0.0149	0.0131	0.0185	0.0229	0.0177	0.0176	0.0204	0.0172	0.0176	0.00603021	0.00636885	0.00632008	0.00674847	None	0	0	FALSE	FALSE		None
chr1	24230905	24231791	74983	M	M	0.0235	0.014	0.0154	None	0.02	Other	1.67857	1.2987	Col9a1	0.013	0.0165	0.0136	0.0156	0.0157	0.0144	0.0227	0.0201	0.0303	0.022	0.0156	0.0198	0.00603021	0.00636885	0.00632008	0.00674847	None	0	0	FALSE	FALSE		None
chr1	24231928	24232250	74984	M	None	0.0197	0.0142	0.0169	None	0.0207	Other	1.38732	1.22485	Col9a1	0.0156	0.0148	0.0101	0.0147	0.0212	0.0193	0.0244	0.0109	0.0152	0.021	0.0146	0.0266	0.00603021	0.00636885	0.00632008	0.00674847	None	0	0	FALSE	FALSE		None
chr1	24243824	24244383	74985	IM	M	0.0212	0.0184	0.0139	None	0.027	Other	1.15217	1.94245	Col9a1	0.0204	0.0139	0.0187	0.0146	0.0117	0.0137	0.0229	0.0224	0.0142	0.0317	0.0245	0.0178	0.00603021	0.00636885	0.00632008	0.00674847	None	0	0	FALSE	FALSE		None
chr1	24245857	24247379	74986	IM	M	0.0227	0.0196	0.0155	None	0.0216	Other	1.15816	1.39355	Col9a1	0.0197	0.0205	0.0181	0.0157	0.0159	0.0147	0.0256	0.02	0.0171	0.0201	0.0219	0.0249	0.00603021	0.00636885	0.00632008	0.00674847	None	0	3	FALSE	FALSE	mForelimbBuds-DS18275 mHindlimbsBuds-DS18279 mCD1-DS17129	None
chr1	24255875	24256396	74987	I	I	0.0169	0.0216	0.0238	None	0.0168	Other	0.782407	0.705882	Col9a1	0.0184	0.0249	0.0258	0.0267	0.0168	0.0213	0.0159	0.0175	0.0194	0.0125	0.0246	0.0192	0.00603021	0.00636885	0.00632008	0.00674847	None	0	2	FALSE	FALSE	mRetina-DS20000 mPATSKI-DS15697	None
chr1	24258500	24258765	74988	None	M	0.0174	0.0177	0.0116	None	0.0236	Other	0.983051	2.03448	Col9a1	0.0217	0.0139	0.0121	0.0108	0.0169	0.0094	0.0173	0.0186	0.0167	0.0257	0.0217	0.0205	0.00603021	0.00636885	0.00632008	0.00674847	None	0	1	FALSE	FALSE	CH12-DS22542	None
chr1	24275084	24275686	74989	M	None	0.0185	0.0164	0.013	None	0.0165	Other	1.12805	1.26923	Col19a1	0.0183	0.0121	0.0168	0.015	0.0093	0.0106	0.0193	0.0161	0.019	0.0139	0.0142	0.0256	0.00603021	0.00636885	0.00632008	0.00674847	None	0	0	FALSE	FALSE		None
chr1	24294457	24294765	74990	M	None	0.022	0.0151	0.0143	None	0.0138	Other	1.45695	0.965035	Col19a1	0.0131	0.0251	0.0083	0.0148	0.0145	0.013	0.02	0.0303	0.0183	0.0117	0.0146	0.0182	0.00603021	0.00636885	0.00632008	0.00674847	None	0	0	FALSE	FALSE		None
chr1	24296279	24297079	74991	M	M	0.021	0.0151	0.0159	None	0.0237	Other	1.39073	1.49057	Col19a1	0.0156	0.0139	0.0153	0.017	0.0156	0.013	0.0221	0.0207	0.0177	0.0253	0.0249	0.0187	0.00603021	0.00636885	0.00632008	0.00674847	None	0	0	FALSE	FALSE		None
chr1	24297599	24297946	74992	M	M	0.0209	0.0154	0.0148	None	0.0251	Other	1.35714	1.69595	Col19a1	0.017	0.0119	0.0157	0.0135	0.0151	0.018	0.0248	0.0171	0.0133	0.0269	0.0269	0.0186	0.00603021	0.00636885	0.00632008	0.00674847	None	0	0	FALSE	FALSE		None
chr1	24309318	24310058	74993	I	I	0.0149	0.016	0.0245	None	0.0151	Other	0.93125	0.616327	Col19a1	0.0163	0.0148	0.0167	0.0244	0.0266	0.023	0.0143	0.0138	0.0178	0.0151	0.0157	0.0145	0.00603021	0.00636885	0.00632008	0.00674847	None	0	1	FALSE	FALSE	mMesoderm-DS18198	None
chr1	24310217	24310840	74994	M	None	0.0211	0.0157	0.0155	None	0.0215	Other	1.34395	1.3871	Col19a1	0.014	0.017	0.0186	0.0154	0.0113	0.0193	0.0165	0.0284	0.0271	0.0219	0.0265	0.0152	0.00603021	0.00636885	0.00632008	0.00674847	None	0	1	FALSE	FALSE	mKidney-DS13948	None
chr1	24314281	24315009	74995	M	None	0.0208	0.0132	0.0149	None	0.0191	Other	1.57576	1.28188	Col19a1	0.0098	0.0178	0.0166	0.0154	0.0125	0.0156	0.0228	0.0197	0.0159	0.0225	0.0153	0.0146	0.00603021	0.00636885	0.00632008	0.00674847	None	0	1	FALSE	FALSE	mKidney-DS13948	None
chr1	24336454	24336900	74996	M	None	0.02	0.0161	0.0114	None	0.0188	Other	1.24224	1.64912	Col19a1	0.0145	0.0195	0.0163	0.011	0.013	0.0111	0.0164	0.0277	0.0222	0.0154	0.022	0.0241	0.00603021	0.00636885	0.00632008	0.00674847	None	0	0	FALSE	FALSE		None
chr1	24337199	24337900	74997	IM	None	0.0218	0.0172	0.0167	None	0.0174	Other	1.26744	1.04192	Col19a1	0.0167	0.0168	0.0187	0.0154	0.0179	0.0195	0.0191	0.0285	0.0222	0.013	0.0255	0.0197	0.00603021	0.00636885	0.00632008	0.00674847	None	0	1	FALSE	FALSE	mRetina-DS20000	None
chr1	24342328	24342737	74998	M	M	0.022	0.0146	0.0142	None	0.023	Other	1.50685	1.61972	Col19a1	0.0132	0.0186	0.0136	0.0138	0.0149	0.0146	0.0219	0.0145	0.0312	0.0256	0.0244	0.0153	0.00603021	0.00636885	0.00632008	0.00674847	None	0	1	FALSE	FALSE	mHindlimbsBuds-DS18279	None
chr1	24343007	24343398	74999	M	None	0.0212	0.0111	0.0153	None	0.02	Other	1.90991	1.30719	Col19a1	0.0088	0.0152	0.0123	0.0167	0.0117	0.0145	0.019	0.0219	0.027	0.018	0.023	0.0217	0.00603021	0.00636885	0.00632008	0.00674847	None	0	1	FALSE	FALSE	mCerebrum-DS14024	None
chr1	24344287	24344873	75000	M	I	0.0203	0.0135	0.0177	None	0.0168	Other	1.5037	0.949153	Col19a1	0.0112	0.0141	0.0188	0.0183	0.017	0.0166	0.0195	0.0229	0.0196	0.0152	0.0246	0.0127	0.00603021	0.00636885	0.00632008	0.00674847	None	0	1	FALSE	FALSE	mCJ7-DS13320	None
chr1	24374341	24374915	75001	None	I	0.0102	0.0125	0.0211	None	0.0108	Other	0.816	0.511848	Col19a1	0.0115	0.0171	0.0099	0.0213	0.0294	0.0138	0.0096	0.0124	0.0097	0.0102	0.0112	0.0119	0.00603021	0.00636885	0.00632008	0.00674847	None	0	2	FALSE	FALSE	mMesoderm-DS18198 mHeart-DS17909	None
chr1	24375527	24375803	75002	M	None	0.0188	0.0082	0.0146	None	0.0175	Other	2.29268	1.19863	Col19a1	0.0095	0.0063	0.0069	0.0149	0.0178	0.0113	0.0181	0.0204	0.0192	0.0143	0.0241	0.0183	0.00603021	0.00636885	0.00632008	0.00674847	None	0	0	FALSE	FALSE		None
chr1	24379466	24380026	75003	None	M	0.0109	0.0108	0.0122	None	0.0225	Other	1.00926	1.84426	Col19a1	0.0125	0.0097	0.0078	0.0113	0.0089	0.0174	0.0104	0.0136	0.0093	0.0328	0.0096	0.0105	0.00603021	0.00636885	0.00632008	0.00674847	None	0	0	FALSE	FALSE		None
chr1	24381748	24382124	75004	None	I	0.0092	0.0119	0.0187	None	0.0081	Other	0.773109	0.433155	Col19a1	0.0076	0.0153	0.0189	0.0132	0.0323	0.0227	0.0081	0.0131	0.0078	0.0088	0.007	0.0075	0.00603021	0.00636885	0.00632008	0.00674847	None	0	1	FALSE	FALSE	CH12-DS22542	None
chr1	24385159	24385696	75006	None	I	0.0175	0.0168	0.0205	None	0.017	Other	1.04167	0.829268	Col19a1	0.0143	0.0151	0.0251	0.0209	0.02	0.0198	0.0166	0.019	0.0185	0.0175	0.0157	0.017	0.00603021	0.00636885	0.00632008	0.00674847	None	0	1	FALSE	FALSE	mBrain-DS12727	None
chr1	24428659	24429150	75007	M	None	0.0189	0.0099	0.0098	None	0.0141	Other	1.90909	1.43878	Col19a1	0.0074	0.0159	0.0091	0.0094	0.0075	0.0126	0.0186	0.0158	0.0233	0.0138	0.0139	0.015	0.00603021	0.00636885	0.00632008	0.00674847	None	0	0	FALSE	FALSE		None
chr1	24441672	24442381	75009	M	None	0.0206	0.0124	0.0147	None	0.0136	Other	1.66129	0.92517	Col19a1	0.0116	0.0121	0.015	0.0144	0.0147	0.0153	0.0207	0.0174	0.024	0.0149	0.0117	0.0123	0.00603021	0.00636885	0.00632008	0.00674847	None	0	0	FALSE	FALSE		None
chr1	24460013	24460621	75010	I	None	0.0115	0.0141	0.0108	None	0.0119	Other	0.815603	1.10185	Col19a1	0.0119	0.0186	0.0145	0.0088	0.0115	0.0155	0.0104	0.0119	0.0144	0.0105	0.0134	0.0138	0.00603021	0.00636885	0.00632008	0.00674847	None	0	1	FALSE	FALSE	mCerebellum-DS14034	None
chr1	24591957	24592327	75012	M	None	0.0335	0.0171	0.0118	None	0.0192	Other	1.95906	1.62712	Col19a1	0.0177	0.0166	0.0162	0.0097	0.0176	0.0128	0.0395	0.024	0.0259	0.0185	0.0199	0.0201	0.00603021	0.00636885	0.00632008	0.00674847	None	0	0	FALSE	FALSE		None
chr1	24592501	24594944	75013	IM	M	0.0413	0.031	0.0132	None	0.026	AllTSS2	1.33226	1.9697	Col19a1	0.0373	0.0262	0.0206	0.0136	0.013	0.0123	0.048	0.0297	0.0341	0.0236	0.0313	0.0263	0.00603021	0.00636885	0.00632008	0.00674847	cUMR	1556	4	FALSE	FALSE	ZhBTc4-DS15236 mMesoderm-DS18198 mBrain-DS12727 mCD1-DS17129 mBrain-DS12727	None
chr1	24595171	24595447	75014	M	None	0.0348	0.0187	0.0109	None	0.0182	Other	1.86096	1.66972	Fam135a	0.0157	0.0241	0.0201	0.0094	0.0125	0.0137	0.0397	0.026	0.0298	0.0173	0.0193	0.0193	0.00603021	0.00636885	0.00632008	0.00674847	None	0	0	FALSE	FALSE		None
chr1	24600963	24601776	75015	IM	M	0.0241	0.0195	0.0143	None	0.0218	Other	1.2359	1.52448	Fam135a	0.0207	0.0149	0.0215	0.0142	0.0135	0.015	0.0247	0.0254	0.021	0.0203	0.023	0.0242	0.00603021	0.00636885	0.00632008	0.00674847	None	0	1	FALSE	FALSE	mBrain-DS12727	None
chr1	24684769	24686428	75017	IM	IM	0.0788	0.1115	0.0937	None	0.0611	AllTSS2	0.706726	0.652081	Lmbrd1	0.0942	0.1267	0.1376	0.109	0.0455	0.0908	0.0896	0.0693	0.056	0.0456	0.0865	0.0728	0.00603021	0.00636885	0.00632008	0.00674847	cUMR	1365	7	FALSE	FALSE	mTR-DS17864 mATn-DS17070 mTN-DS16171 mA20-DS16695 mfLiver_F5-DS20999 mSpleen-DS18870 mPATSKI-DS15697 mTR-DS17864	None
chr1	24737147	24737516	75018	M	None	0.0201	0.012	0.0188	None	0.0174	Enhancer4	1.675	0.925532	Lmbrd1	0.0103	0.0136	0.0146	0.02	0.0166	0.0173	0.0187	0.0276	0.016	0.0131	0.0281	0.0168	0.00603021	0.00636885	0.00632008	0.00674847	None	0	2	FALSE	FALSE	mATr-DS20149 mB-DS17866	None
chr1	24737678	24738312	75019	None	I	0.0133	0.0073	0.0232	None	0.0139	Enhancer4	1.82192	0.599138	Lmbrd1	0.0064	0.0089	0.0076	0.0325	0.0086	0.0094	0.0154	0.0098	0.0109	0.0157	0.0111	0.0125	0.00603021	0.00636885	0.00632008	0.00674847	None	0	3	FALSE	FALSE	mCD19-DS16168 mTR-DS17864 mSpleen-DS18870	None
chr1	24756168	24756620	75021	None	I	0.0124	0.0142	0.0252	None	0.0148	Other	0.873239	0.587302	Lmbrd1	0.0125	0.013	0.0199	0.0285	0.0203	0.0197	0.0124	0.016	0.0081	0.0143	0.0176	0.0129	0.00603021	0.00636885	0.00632008	0.00674847	None	0	1	FALSE	FALSE	ZhBTc4-DS17562	None
chr1	24776445	24776883	75022	None	I	0.0094	0.0194	0.0266	None	0.0135	Other	0.484536	0.507519	Lmbrd1	0.0149	0.0279	0.0208	0.0232	0.0313	0.0321	0.0074	0.0098	0.0151	0.0116	0.0138	0.0181	0.00603021	0.00636885	0.00632008	0.00674847	None	0	2	FALSE	FALSE	mBrain-DS12727 mA20-DS16695	None
chr1	24785260	24785640	75023	M	None	0.0217	0.0165	0.0198	None	0.0207	Other	1.31515	1.04545	Lmbrd1	0.015	0.0153	0.0216	0.0171	0.0193	0.0279	0.023	0.021	0.0185	0.0232	0.014	0.0216	0.00603021	0.00636885	0.00632008	0.00674847	None	0	0	FALSE	FALSE		None
chr1	24785875	24786605	75024	M	M	0.0198	0.014	0.0169	None	0.0238	Other	1.41429	1.40828	Lmbrd1	0.0142	0.0147	0.0125	0.0161	0.0186	0.0178	0.0174	0.0199	0.0273	0.0246	0.0243	0.0213	0.00603021	0.00636885	0.00632008	0.00674847	None	0	0	FALSE	FALSE		None
chr1	24787663	24788123	75025	M	None	0.0194	0.0178	0.0154	None	0.0196	Other	1.08989	1.27273	Lmbrd1	0.015	0.0197	0.0228	0.0163	0.0145	0.0137	0.018	0.0191	0.0243	0.0201	0.017	0.0211	0.00603021	0.00636885	0.00632008	0.00674847	None	0	1	FALSE	FALSE	mHindlimbsBuds-DS18279	None
chr1	24788630	24789404	75026	M	None	0.0217	0.0169	0.0183	None	0.0191	Other	1.28402	1.04372	Lmbrd1	0.0159	0.021	0.0144	0.018	0.0182	0.0191	0.0192	0.0273	0.0231	0.019	0.0191	0.0192	0.00603021	0.00636885	0.00632008	0.00674847	None	0	2	FALSE	FALSE	mBrain-DS12727 mGenitalFatPad-DS18780	None
chr1	24789697	24790487	75027	M	None	0.0215	0.0155	0.0156	None	0.0194	Other	1.3871	1.24359	Lmbrd1	0.0137	0.0184	0.0169	0.0158	0.0172	0.0136	0.023	0.0175	0.0217	0.0185	0.0182	0.0227	0.00603021	0.00636885	0.00632008	0.00674847	None	0	0	FALSE	FALSE		None
chr1	24792228	24792482	75028	None	I	0.0154	0.0156	0.0225	None	0.0222	Other	0.987179	0.986667	Lmbrd1	0.0119	0.019	0.0212	0.0221	0.023	0.023	0.0173	0.0143	0.0107	0.0255	0.0232	0.013	0.00603021	0.00636885	0.00632008	0.00674847	None	0	0	FALSE	FALSE		None
chr1	24793917	24794242	75029	M	None	0.0194	0.0115	0.0119	None	0.0158	Other	1.68696	1.32773	Lmbrd1	0.0099	0.0111	0.0162	0.0114	0.0139	0.0115	0.0205	0.0168	0.0189	0.0133	0.0181	0.0195	0.00603021	0.00636885	0.00632008	0.00674847	None	0	0	FALSE	FALSE		None
chr1	24801967	24802472	75030	M	None	0.0182	0.0094	0.0125	None	0.0099	Other	1.93617	0.792	Lmbrd1	0.0083	0.01	0.0114	0.0119	0.0135	0.0134	0.0177	0.0162	0.0222	0.0088	0.0096	0.0127	0.00603021	0.00636885	0.00632008	0.00674847	None	0	1	FALSE	FALSE	mGenitalFatPad-DS18780	None
chr1	24821571	24821947	75031	M	None	0.0198	0.0163	0.0148	None	0.0205	Other	1.21472	1.38514	Lmbrd1	0.0126	0.0211	0.0204	0.015	0.0104	0.0178	0.0211	0.0167	0.0193	0.0208	0.0241	0.016	0.00603021	0.00636885	0.00632008	0.00674847	None	0	0	FALSE	FALSE		None
chr1	24839000	24839341	75032	None	I	0.0136	0.0147	0.0204	None	0.0183	Enhancer4	0.92517	0.897059	Bai3	0.0154	0.0131	0.0149	0.0195	0.0204	0.0231	0.0134	0.0152	0.0122	0.0162	0.0178	0.0243	0.00603021	0.00636885	0.00632008	0.00674847	None	0	0	FALSE	FALSE		None
chr1	24854021	24854638	75033	M	None	0.0208	0.0161	0.017	None	0.0166	Other	1.29193	0.976471	Bai3	0.0146	0.0168	0.019	0.0177	0.0134	0.0181	0.0188	0.0256	0.0216	0.0174	0.0181	0.0132	0.00603021	0.00636885	0.00632008	0.00674847	None	0	0	FALSE	FALSE		None
chr1	24923666	24924275	75034	M	None	0.0174	0.0121	0.0105	None	0.0133	Other	1.43802	1.26667	Bai3	0.0104	0.0166	0.0112	0.0102	0.0126	0.0097	0.0149	0.0193	0.0231	0.0131	0.016	0.0112	0.00603021	0.00636885	0.00632008	0.00674847	None	0	2	FALSE	FALSE	mCerebrum-DS14024 mLung-DS14479	None
chr1	24958065	24958587	75035	None	I	0.0121	0.009	0.0202	None	0.0088	Other	1.34444	0.435644	Bai3	0.0073	0.0091	0.0131	0.0217	0.0187	0.0173	0.0129	0.0089	0.0137	0.0088	0.0096	0.0081	0.00603021	0.00636885	0.00632008	0.00674847	None	0	1	FALSE	FALSE	mBrain-DS12727	None
chr1	25085597	25085974	75041	M	None	0.0185	0.0105	0.0143	None	0.0142	Other	1.7619	0.993007	Bai3	0.0083	0.0155	0.01	0.0148	0.0171	0.0106	0.0195	0.0195	0.0144	0.0144	0.0123	0.0154	0.00603021	0.00636885	0.00632008	0.00674847	None	0	0	FALSE	FALSE		None
chr1	25117723	25118198	75044	M	None	0.0183	0.0112	0.0101	None	0.0117	Other	1.63393	1.15842	Bai3	0.01	0.0118	0.0136	0.0081	0.0117	0.0143	0.0168	0.0172	0.0243	0.0103	0.0135	0.013	0.00603021	0.00636885	0.00632008	0.00674847	None	0	1	FALSE	FALSE	mCerebrum-DS14024	None
chr1	25119368	25119959	75045	M	None	0.0186	0.0146	0.0135	None	0.0176	Other	1.27397	1.3037	Bai3	0.0129	0.0162	0.0171	0.0122	0.0144	0.0166	0.0175	0.0178	0.0232	0.015	0.0196	0.0218	0.00603021	0.00636885	0.00632008	0.00674847	None	0	0	FALSE	FALSE		None
chr1	25120084	25120653	75046	M	M	0.0167	0.0097	0.0118	None	0.0183	Other	1.72165	1.55085	Bai3	0.007	0.014	0.0118	0.012	0.0137	0.0097	0.016	0.0157	0.0201	0.0178	0.0191	0.0187	0.00603021	0.00636885	0.00632008	0.00674847	None	0	1	FALSE	FALSE	mCerebrum-DS14024	None
chr1	25126784	25127274	75047	M	None	0.018	0.0099	0.015	None	0.0164	Other	1.81818	1.09333	Bai3	0.0071	0.015	0.0109	0.0143	0.0139	0.0177	0.0203	0.0128	0.0169	0.0174	0.0149	0.0152	0.00603021	0.00636885	0.00632008	0.00674847	None	0	0	TRUE	FALSE		None
chr1	25162909	25163881	75050	None	M	0.017	0.0155	0.0146	None	0.0203	Other	1.09677	1.39041	Bai3	0.0147	0.0177	0.0151	0.0145	0.0136	0.0156	0.0177	0.0142	0.018	0.0213	0.0166	0.0217	0.00603021	0.00636885	0.00632008	0.00674847	None	0	2	TRUE	FALSE	mBrain-DS12727 mMesoderm-DS18198	None
chr1	25165911	25166268	75051	M	None	0.0194	0.0103	0.0091	None	0.0118	Other	1.8835	1.2967	Bai3	0.0042	0.0235	0.0105	0.0083	0.0091	0.0113	0.0175	0.0215	0.0231	0.0111	0.0145	0.0108	0.00603021	0.00636885	0.00632008	0.00674847	None	0	0	TRUE	FALSE		None
chr1	25225317	25225918	75054	M	None	0.0194	0.008	0.0091	None	0.0103	Other	2.425	1.13187	Bai3	0.0064	0.01	0.0097	0.0084	0.0108	0.0094	0.0189	0.0177	0.0229	0.0115	0.0097	0.0081	0.00603021	0.00636885	0.00632008	0.00674847	None	0	0	TRUE	FALSE		None
chr1	25227181	25227789	75055	M	None	0.018	0.0099	0.0124	None	0.0152	Other	1.81818	1.22581	Bai3	0.0054	0.0178	0.0121	0.0103	0.0173	0.0145	0.0177	0.018	0.019	0.0161	0.0118	0.0168	0.00603021	0.00636885	0.00632008	0.00674847	None	0	0	TRUE	FALSE		None
chr1	25228061	25228912	75056	M	None	0.0187	0.0133	0.0154	None	0.0175	Other	1.40602	1.13636	Bai3	0.011	0.0163	0.0157	0.0151	0.0147	0.0168	0.0186	0.019	0.0186	0.0174	0.0161	0.0194	0.00603021	0.00636885	0.00632008	0.00674847	None	0	1	TRUE	FALSE	mBrain-DS12727	None
chr1	25233060	25233914	75059	M	M	0.0198	0.0138	0.013	None	0.0172	Other	1.43478	1.32308	Bai3	0.013	0.0145	0.0152	0.0129	0.0128	0.0134	0.0212	0.0189	0.0163	0.015	0.0206	0.0191	0.00603021	0.00636885	0.00632008	0.00674847	None	0	1	TRUE	FALSE	mCerebrum-DS14024	None
chr1	25286738	25287982	75065	M	None	0.0192	0.0133	0.0108	None	0.014	Other	1.44361	1.2963	Bai3	0.01	0.0172	0.0173	0.0113	0.0117	0.0085	0.0213	0.0161	0.0162	0.0119	0.0182	0.0147	0.00603021	0.00636885	0.00632008	0.00674847	None	0	0	TRUE	FALSE		None
chr1	25346178	25346861	75070	M	None	0.018	0.0095	0.0119	None	0.0143	Other	1.89474	1.20168	Bai3	0.0087	0.0104	0.0105	0.0102	0.0146	0.0142	0.0211	0.0101	0.0176	0.0149	0.0114	0.0159	0.00603021	0.00636885	0.00632008	0.00674847	None	0	0	TRUE	FALSE		None
chr1	25406119	25407054	75075	M	M	0.0209	0.0121	0.0131	None	0.0216	Other	1.72727	1.64885	Bai3	0.0097	0.0151	0.0146	0.0126	0.0137	0.014	0.0208	0.0206	0.0217	0.0228	0.0218	0.0183	0.00603021	0.00636885	0.00632008	0.00674847	None	0	0	TRUE	FALSE		None
chr1	25432425	25433082	75076	M	None	0.0184	0.0071	0.008	None	0.0071	Other	2.59155	0.8875	Bai3	0.0067	0.0061	0.0093	0.0074	0.0082	0.0094	0.0195	0.0173	0.0162	0.0065	0.0056	0.01	0.00603021	0.00636885	0.00632008	0.00674847	None	0	0	TRUE	FALSE		None
chr1	25433739	25434542	75077	M	None	0.0176	0.0086	0.0104	None	0.0094	Other	2.04651	0.903846	Bai3	0.0075	0.0118	0.0077	0.0097	0.0099	0.013	0.0187	0.0096	0.0235	0.0101	0.0081	0.0089	0.00603021	0.00636885	0.00632008	0.00674847	None	0	1	TRUE	FALSE	mCerebrum-DS14024	None
chr1	25512028	25513828	75079	M	IM	0.0188	0.0127	0.0204	None	0.0178	Other	1.48031	0.872549	Bai3	0.0109	0.0158	0.0134	0.0195	0.0195	0.0235	0.0191	0.018	0.0186	0.0196	0.0141	0.0173	0.00603021	0.00636885	0.00632008	0.00674847	None	0	0	TRUE	FALSE		None
chr1	25518617	25521288	75080	IM	IM	0.0211	0.0153	0.0191	None	0.0167	Other	1.37908	0.874346	Bai3	0.0127	0.0195	0.0172	0.0176	0.0232	0.0202	0.0225	0.016	0.0227	0.0181	0.012	0.0182	0.00603021	0.00636885	0.00632008	0.00674847	None	0	2	TRUE	FALSE	mCerebrum-DS14024 mHindlimbsBuds-DS18279	None
chr1	25521396	25525119	75081	IM	IM	0.0199	0.016	0.0189	None	0.0166	Other	1.24375	0.878307	Bai3	0.0135	0.0196	0.0184	0.0179	0.0193	0.0212	0.0189	0.0199	0.0232	0.0164	0.0161	0.0177	0.00603021	0.00636885	0.00632008	0.00674847	None	0	0	TRUE	FALSE		None
chr1	25525285	25526214	75082	M	I	0.0151	0.0134	0.0172	None	0.0136	Other	1.12687	0.790698	Bai3	0.0119	0.0176	0.0122	0.0159	0.0169	0.0209	0.0139	0.0169	0.0169	0.013	0.0173	0.0112	0.00603021	0.00636885	0.00632008	0.00674847	None	0	1	TRUE	FALSE	mBrain-DS12727	None
chr1	25563999	25564763	75083	M	None	0.017	0.0119	0.0113	None	0.0124	Other	1.42857	1.09735	Bai3	0.0103	0.014	0.0134	0.011	0.0081	0.015	0.0168	0.0187	0.0155	0.0119	0.0104	0.0157	0.00603021	0.00636885	0.00632008	0.00674847	None	0	2	TRUE	FALSE	mCerebrum-DS14024 mIntestine_Large-DS19140	None
chr1	25567041	25567725	75085	I	I	0.0101	0.0115	0.0211	None	0.0103	Other	0.878261	0.488152	Bai3	0.01	0.0129	0.014	0.0185	0.0259	0.0245	0.0082	0.0094	0.0172	0.0084	0.0146	0.0103	0.00603021	0.00636885	0.00632008	0.00674847	None	0	1	TRUE	FALSE	mRetina-DS20000	None
chr1	25880781	25888436	75109	IM	IM	0.0206	0.0165	0.012	None	0.0164	AllTSS2	1.24848	1.36667	Bai3	0.0153	0.0194	0.0162	0.0127	0.0106	0.0114	0.0221	0.0174	0.0198	0.0163	0.0177	0.0151	0.00603021	0.00636885	0.00632008	0.00674847	Canyon	3724	8	TRUE	FALSE	mCerebrum-DS14024 mfBrain-DS14536 mCerebellum-DS14034 mfBrain-DS14536 mCerebellum-DS14034 mCerebellum-DS14034 mRetina-DS19060 mCerebellum-DS14034 mCerebellum-DS14034 mCerebrum-DS14024 mCerebrum-DS14024 mRetina-DS19060 mCerebrum-DS14024 mCerebellum-DS14034 mCJ7-DS13320 mBrain-DS12727 mMesoderm-DS18198 mMesoderm-DS18198 mKidney-DS13948	None
chr1	25983620	25984266	75113	M	None	0.0162	0.0091	0.0104	None	0.0132	Other	1.78022	1.26923	Bai3	0.0074	0.0095	0.013	0.0112	0.011	0.0076	0.0163	0.0136	0.0189	0.0118	0.0167	0.013	0.00603021	0.00636885	0.00632008	0.00674847	None	0	1	FALSE	FALSE	mCerebellum-DS14034	None
chr1	26086012	26086916	75118	M	None	0.0159	0.0063	0.0105	None	0.01	Other	2.52381	0.952381	Bai3	0.0044	0.0099	0.0069	0.0096	0.0116	0.0119	0.0176	0.0125	0.0144	0.0078	0.0123	0.0128	0.00603021	0.00636885	0.00632008	0.00674847	None	0	0	FALSE	FALSE		None
chr1	26359730	26361789	75130	M	None	0.0164	0.0085	0.0089	None	0.01	Other	1.92941	1.1236	Bai3	0.0072	0.012	0.0074	0.0086	0.0075	0.0111	0.0197	0.0123	0.0107	0.0086	0.0108	0.0128	0.00603021	0.00636885	0.00632008	0.00674847	None	0	1	FALSE	FALSE	E14-DS21450 E14-DS21450	None
chr1	26379829	26380543	75132	M	None	0.0147	0.0094	0.0105	None	0.0106	Other	1.56383	1.00952	Bai3	0.0064	0.0123	0.0137	0.0098	0.0105	0.0126	0.0172	0.0107	0.0115	0.0107	0.0099	0.0112	0.00603021	0.00636885	0.00632008	0.00674847	None	0	0	FALSE	FALSE		None
chr1	26414368	26415273	75137	M	None	0.0173	0.008	0.0078	None	0.0076	Other	2.1625	0.974359	Bai3	0.0047	0.012	0.0116	0.0088	0.0072	0.0056	0.021	0.0089	0.0157	0.0075	0.0068	0.0086	0.00603021	0.00636885	0.00632008	0.00674847	None	0	0	FALSE	FALSE		None
chr1	26430017	26430642	75138	M	None	0.0171	0.0096	0.013	None	0.0138	Other	1.78125	1.06154	Bai3	0.0049	0.017	0.0132	0.0115	0.0137	0.0168	0.0176	0.0161	0.0166	0.0143	0.0164	0.0099	0.00603021	0.00636885	0.00632008	0.00674847	None	0	0	FALSE	FALSE		None
chr1	26812376	26812853	75152	M	None	0.0157	0.0097	0.0142	None	0.011	Other	1.61856	0.774648	Bai3	0.0096	0.007	0.0132	0.0131	0.0173	0.0146	0.0196	0.0118	0.0084	0.0098	0.0099	0.0151	0.00603021	0.00636885	0.00632008	0.00674847	None	0	0	FALSE	FALSE		None
chr1	26813133	26815196	75153	M	M	0.0179	0.0114	0.0092	None	0.0126	Other	1.57018	1.36957	Bai3	0.0102	0.0151	0.0099	0.0092	0.0107	0.008	0.0198	0.0141	0.0165	0.0103	0.0169	0.0139	0.00603021	0.00636885	0.00632008	0.00674847	None	0	0	FALSE	FALSE		None
chr1	26871557	26872081	75157	M	None	0.0157	0.0078	0.0084	None	0.0103	Other	2.01282	1.22619	Bai3	0.0042	0.0158	0.0078	0.0092	0.0096	0.005	0.0173	0.0101	0.017	0.0072	0.0129	0.0152	0.00603021	0.00636885	0.00632008	0.00674847	None	0	0	FALSE	FALSE		None
chr1	26873609	26874363	75159	M	None	0.0174	0.0121	0.0108	None	0.011	Other	1.43802	1.01852	Bai3	0.0063	0.0222	0.0149	0.0129	0.006	0.0089	0.0197	0.0169	0.0107	0.0085	0.0136	0.0144	0.00603021	0.00636885	0.00632008	0.00674847	None	0	0	FALSE	FALSE		None
chr1	26879217	26879848	75160	M	None	0.0192	0.0083	0.0096	None	0.0075	Other	2.31325	0.78125	Bai3	0.0036	0.0178	0.0092	0.0089	0.0111	0.0104	0.0156	0.0166	0.0338	0.0056	0.0115	0.0078	0.00603021	0.00636885	0.00632008	0.00674847	None	0	0	FALSE	FALSE		None
chr1	26951823	26952543	75161	M	None	0.0165	0.0097	0.014	None	0.0112	Other	1.70103	0.8	Bai3	0.0068	0.0153	0.0104	0.0118	0.0137	0.0203	0.0167	0.013	0.0201	0.0105	0.0136	0.0105	0.00603021	0.00636885	0.00632008	0.00674847	None	0	0	FALSE	FALSE		None
chr1	26952794	26953238	75162	M	None	0.0169	0.011	0.0123	None	0.014	Other	1.53636	1.13821	Bai3	0.0101	0.0132	0.0109	0.0096	0.0184	0.0145	0.0199	0.0104	0.0152	0.0163	0.012	0.0103	0.00603021	0.00636885	0.00632008	0.00674847	None	0	0	FALSE	FALSE		None
chr1	26955557	26956055	75163	M	None	0.0163	0.0087	0.0118	None	0.012	Other	1.87356	1.01695	Bai3	0.0083	0.0049	0.014	0.0125	0.0123	0.0096	0.0133	0.0164	0.0256	0.0123	0.0125	0.0109	0.00603021	0.00636885	0.00632008	0.00674847	None	0	0	FALSE	FALSE		None
chr1	26956401	26960776	75164	M	M	0.0164	0.0109	0.0117	None	0.0151	Other	1.50459	1.2906	Bai3	0.0089	0.0146	0.0116	0.0116	0.0122	0.0114	0.0155	0.0165	0.0192	0.0158	0.0148	0.0135	0.00603021	0.00636885	0.00632008	0.00674847	None	0	1	FALSE	FALSE	E14-DS21450	None
chr1	26960797	26962212	75165	M	None	0.0175	0.0121	0.0129	None	0.0121	Other	1.44628	0.937984	Bai3	0.0088	0.0172	0.0147	0.0133	0.0116	0.0129	0.0186	0.0147	0.0177	0.012	0.0092	0.0153	0.00603021	0.00636885	0.00632008	0.00674847	None	0	0	FALSE	FALSE		None
chr1	26963038	26963576	75166	None	I	0.0088	0.0072	0.014	None	0.0066	Other	1.22222	0.471429	Bai3	0.006	0.0094	0.0078	0.0164	0.0076	0.013	0.008	0.0092	0.011	0.0064	0.0074	0.0062	0.00603021	0.00636885	0.00632008	0.00674847	None	0	0	FALSE	FALSE		None
chr1	26963943	26964637	75167	None	I	0.0109	0.0093	0.0137	None	0.007	Other	1.17204	0.510949	Bai3	0.0088	0.0113	0.0083	0.0172	0.0098	0.0072	0.0108	0.0141	0.0071	0.0073	0.0062	0.0072	0.00603021	0.00636885	0.00632008	0.00674847	None	0	1	FALSE	FALSE	mA20-DS16695	None
chr1	26993372	26994595	75170	M	None	0.018	0.0106	0.0137	None	0.0116	Other	1.69811	0.846715	Bai3	0.0071	0.0168	0.012	0.0118	0.0181	0.0154	0.0194	0.0178	0.0138	0.0118	0.0107	0.0122	0.00603021	0.00636885	0.00632008	0.00674847	None	0	0	FALSE	FALSE		None
chr1	27226857	27227710	75183	M	None	0.0209	0.0058	0.0067	None	0.0041	Other	3.60345	0.61194	Bai3	0.0039	0.011	0.0047	0.0077	0.0049	0.0054	0.0233	0.0136	0.0221	0.0047	0.0021	0.0048	0.00603021	0.00636885	0.00632008	0.00674847	None	0	0	FALSE	FALSE		None
chr1	27313903	27314543	75187	M	None	0.016	0.0066	0.007	None	0.0063	Other	2.42424	0.9	Bai3	0.0034	0.0104	0.0101	0.0078	0.0056	0.0057	0.0149	0.0057	0.0318	0.0047	0.0099	0.0065	0.00603021	0.00636885	0.00632008	0.00674847	None	0	0	FALSE	FALSE		None
chr1	27345732	27346418	75188	M	None	0.0173	0.0102	0.0102	None	0.0131	Other	1.69608	1.28431	Bai3	0.0061	0.0127	0.018	0.0104	0.0093	0.0103	0.0189	0.0162	0.0138	0.0117	0.0138	0.016	0.00603021	0.00636885	0.00632008	0.00674847	None	0	0	FALSE	FALSE		None
chr1	27355408	27355877	75190	M	None	0.0159	0.0101	0.0113	None	0.0102	Other	1.57426	0.902655	Bai3	0.0072	0.0146	0.0121	0.0108	0.0114	0.0125	0.019	0.0138	0.0086	0.0104	0.0151	0.0047	0.00603021	0.00636885	0.00632008	0.00674847	None	0	1	FALSE	FALSE	mCerebrum-DS14024	None
chr1	27364812	27365832	75195	M	None	0.0167	0.0098	0.0092	None	0.0104	Other	1.70408	1.13043	Bai3	0.0086	0.0131	0.0091	0.0081	0.0107	0.011	0.0192	0.0166	0.0088	0.0089	0.015	0.0092	0.00603021	0.00636885	0.00632008	0.00674847	None	0	0	FALSE	FALSE		None
chr1	27645659	27646306	75214	IM	IM	0.0142	0.0116	0.0175	None	0.0112	Other	1.22414	0.64	Bai3	0.0117	0.0076	0.0159	0.0139	0.0198	0.0256	0.0138	0.0148	0.0151	0.0116	0.0097	0.0115	0.00603021	0.00636885	0.00632008	0.00674847	None	0	0	FALSE	FALSE		None
chr1	27736774	27737381	75218	M	None	0.0161	0.0096	0.0133	None	0.0156	Other	1.67708	1.17293	Bai3	0.0104	0.0093	0.0082	0.0136	0.0118	0.0136	0.0145	0.0167	0.0207	0.0185	0.0119	0.0126	0.00603021	0.00636885	0.00632008	0.00674847	None	0	0	FALSE	FALSE		None
chr1	28124813	28125849	75247	M	I	0.0189	0.0095	0.0138	None	0.009	Other	1.98947	0.652174	Bai3	0.0066	0.0133	0.0127	0.0133	0.0169	0.0125	0.0214	0.0112	0.02	0.0094	0.0066	0.0104	0.00603021	0.00636885	0.00632008	0.00674847	None	0	0	FALSE	FALSE		None
chr1	28158244	28159397	75248	M	None	0.0179	0.0092	0.0108	None	0.0109	Other	1.94565	1.00926	Bai3	0.008	0.0128	0.008	0.0105	0.0085	0.0135	0.0169	0.0185	0.0204	0.0103	0.0091	0.0142	0.00603021	0.00636885	0.00632008	0.00674847	None	0	1	FALSE	FALSE	mCerebellum-DS14034	None
chr1	28179427	28180241	75250	M	None	0.0169	0.0112	0.0096	None	0.0145	Other	1.50893	1.51042	Bai3	0.0074	0.0173	0.0136	0.009	0.0092	0.0118	0.0171	0.0158	0.0174	0.0164	0.0135	0.0106	0.00603021	0.00636885	0.00632008	0.00674847	None	0	0	FALSE	FALSE		None
chr1	28251037	28252224	75253	M	None	0.0174	0.0097	0.0094	None	0.0115	Other	1.79381	1.2234	Bai3	0.0085	0.0104	0.0118	0.0101	0.0062	0.0101	0.0181	0.0146	0.0185	0.0098	0.0111	0.016	0.00603021	0.00636885	0.00632008	0.00674847	None	0	0	FALSE	FALSE		None
chr1	28491234	28492119	75263	M	None	0.0164	0.0096	0.0106	None	0.0104	Other	1.70833	0.981132	Ptp4a1	0.0089	0.0101	0.0108	0.0103	0.0111	0.0112	0.0168	0.0157	0.0162	0.0109	0.0089	0.0108	0.00603021	0.00636885	0.00632008	0.00674847	None	0	0	FALSE	FALSE		None
chr1	29194059	29194561	75315	I	I	0.0107	0.0137	0.0121	None	0.0077	Other	0.781022	0.636364	Ptp4a1	0.0069	0.0224	0.0207	0.0155	0.007	0.0067	0.0107	0.0109	0.0104	0.0054	0.0145	0.0063	0.00603021	0.00636885	0.00632008	0.00674847	None	0	0	FALSE	FALSE		None
chr1	29792319	29794390	75347	M	None	0.016	0.0117	0.009	None	0.0112	Other	1.36752	1.24444	Ptp4a1	0.011	0.0147	0.0097	0.0089	0.011	0.0078	0.0174	0.0139	0.0142	0.0117	0.0108	0.0105	0.00603021	0.00636885	0.00632008	0.00674847	None	0	1	FALSE	FALSE	E14-DS21450	None
chr1	29867047	29869149	75352	M	None	0.0169	0.0101	0.0081	None	0.0096	Other	1.67327	1.18519	Ptp4a1	0.0077	0.0141	0.0116	0.0083	0.0076	0.0081	0.0183	0.0132	0.017	0.0081	0.0115	0.0115	0.00603021	0.00636885	0.00632008	0.00674847	None	0	1	FALSE	FALSE	E14-DS21450	None
chr1	29877269	29877802	75354	None	I	0.012	0.0082	0.018	None	0.0085	Other	1.46341	0.472222	Ptp4a1	0.0046	0.0144	0.01	0.0209	0.0157	0.0117	0.014	0.0085	0.01	0.008	0.0056	0.0126	0.00603021	0.00636885	0.00632008	0.00674847	None	0	0	FALSE	FALSE		None
chr1	30121830	30122423	75363	M	None	0.0182	0.0066	0.0097	None	0.0075	Other	2.75758	0.773196	Ptp4a1	0.0031	0.0122	0.0089	0.0085	0.011	0.0123	0.0202	0.0164	0.0138	0.0081	0.0064	0.0072	0.00603021	0.00636885	0.00632008	0.00674847	None	0	0	FALSE	FALSE		None
chr1	30144872	30148185	75368	I	None	0.0128	0.0138	0.0086	None	0.0132	Other	0.927536	1.53488	Ptp4a1	0.0155	0.0095	0.0143	0.0083	0.0086	0.0096	0.0136	0.0126	0.0105	0.0129	0.0146	0.0125	0.00603021	0.00636885	0.00632008	0.00674847	None	0	1	FALSE	FALSE	ZhBTc4-DS17562	None
chr1	30315572	30317365	75375	None	IM	0.0135	0.0115	0.0177	None	0.0156	Other	1.17391	0.881356	Ptp4a1	0.0113	0.0129	0.0105	0.0168	0.0167	0.0212	0.0122	0.0176	0.0126	0.0165	0.015	0.014	0.00603021	0.00636885	0.00632008	0.00674847	None	0	1	FALSE	FALSE	ZhBTc4-DS17562	None
chr1	30354935	30355823	75378	None	M	0.0139	0.0113	0.0128	None	0.0182	Other	1.23009	1.42188	Ptp4a1	0.0117	0.0115	0.0099	0.0119	0.0129	0.0151	0.0142	0.0133	0.0138	0.0204	0.0121	0.0192	0.00603021	0.00636885	0.00632008	0.00674847	None	0	0	FALSE	FALSE		None
chr1	30469963	30470942	75385	IM	M	0.0151	0.0134	0.011	None	0.0148	Other	1.12687	1.34545	Ptp4a1	0.0117	0.0145	0.0164	0.0103	0.0132	0.0112	0.0162	0.0134	0.0135	0.0118	0.0152	0.0218	0.00603021	0.00636885	0.00632008	0.00674847	None	0	2	FALSE	FALSE	mESC_F4WT-DS17060 mESC_FIKO-DS17063	None
chr1	30575104	30576999	75393	M	None	0.0184	0.012	0.0127	None	0.0154	Other	1.53333	1.2126	Ptp4a1	0.0107	0.0134	0.014	0.0104	0.0138	0.0184	0.0178	0.016	0.0233	0.015	0.0147	0.0171	0.00603021	0.00636885	0.00632008	0.00674847	None	0	0	FALSE	FALSE		None
chr1	30625574	30626050	75396	M	None	0.0169	0.0102	0.0096	None	0.0105	Other	1.65686	1.09375	Ptp4a1	0.0087	0.0111	0.0129	0.0086	0.0146	0.0084	0.019	0.0147	0.0128	0.0076	0.0105	0.0175	0.00603021	0.00636885	0.00632008	0.00674847	None	0	0	FALSE	FALSE		None
chr1	30627747	30629977	75398	IM	M	0.0218	0.0165	0.0136	None	0.0182	Other	1.32121	1.33824	Ptp4a1	0.0161	0.0149	0.0194	0.0119	0.0164	0.0159	0.0213	0.0215	0.0236	0.0145	0.0212	0.0239	0.00603021	0.00636885	0.00632008	0.00674847	None	0	0	FALSE	FALSE		None
chr1	30641558	30642262	75399	M	I	0.0168	0.0113	0.0263	None	0.0124	Other	1.48673	0.471483	Ptp4a1	0.009	0.014	0.014	0.0233	0.0359	0.0268	0.0152	0.0172	0.0212	0.0113	0.0145	0.0131	0.00603021	0.00636885	0.00632008	0.00674847	None	0	2	FALSE	FALSE	mMesoderm-DS18198 mRetina-DS19060	None
chr1	30672755	30673302	75402	M	None	0.0179	0.0099	0.0134	None	0.0111	Other	1.80808	0.828358	Ptp4a1	0.01	0.0098	0.0097	0.0124	0.0135	0.0161	0.0177	0.0165	0.0203	0.0098	0.0092	0.0163	0.00603021	0.00636885	0.00632008	0.00674847	None	0	0	FALSE	FALSE		None
chr1	30703049	30703621	75404	None	I	0.018	0.0131	0.0172	None	0.0171	Other	1.37405	0.994186	Ptp4a1	0.0123	0.0175	0.0099	0.0163	0.0259	0.0123	0.0182	0.0144	0.0215	0.0179	0.0123	0.02	0.00603021	0.00636885	0.00632008	0.00674847	None	0	0	FALSE	FALSE		None
chr1	30706343	30706958	75405	M	None	0.0182	0.0116	0.013	None	0.0146	Other	1.56897	1.12308	Ptp4a1	0.0117	0.0111	0.012	0.012	0.0159	0.0134	0.0186	0.017	0.0181	0.0143	0.0111	0.0189	0.00603021	0.00636885	0.00632008	0.00674847	None	0	1	FALSE	FALSE	mCerebrum-DS14024	None
chr1	30709825	30710353	75406	M	None	0.0172	0.0137	0.0151	None	0.0157	Other	1.25547	1.03974	Ptp4a1	0.0119	0.0152	0.0165	0.0143	0.0155	0.0172	0.0187	0.0153	0.0148	0.0159	0.0163	0.0143	0.00603021	0.00636885	0.00632008	0.00674847	None	0	0	FALSE	FALSE		None
chr1	30710842	30711895	75407	M	M	0.019	0.0126	0.0148	None	0.0197	Other	1.50794	1.33108	Ptp4a1	0.0115	0.016	0.0114	0.0136	0.0169	0.0167	0.0154	0.0227	0.0257	0.0224	0.0136	0.0193	0.00603021	0.00636885	0.00632008	0.00674847	None	0	0	FALSE	FALSE		None
chr1	30712313	30713565	75408	M	M	0.0206	0.0117	0.0135	None	0.0172	Other	1.76068	1.27407	Ptp4a1	0.0076	0.0176	0.0151	0.013	0.0116	0.0163	0.0216	0.0184	0.0201	0.0182	0.0151	0.0169	0.00603021	0.00636885	0.00632008	0.00674847	None	0	2	FALSE	FALSE	mCerebrum-DS14024 mMesoderm-DS18198	None
chr1	30713602	30714236	75409	M	None	0.0187	0.0096	0.0115	None	0.0173	Other	1.94792	1.50435	Ptp4a1	0.0063	0.0135	0.0132	0.0137	0.009	0.0071	0.0196	0.0151	0.0201	0.0168	0.0196	0.0159	0.00603021	0.00636885	0.00632008	0.00674847	None	0	0	FALSE	FALSE		None
chr1	30738512	30739091	75410	M	None	0.0222	0.0119	0.0143	None	0.0154	Other	1.86555	1.07692	Ptp4a1	0.0073	0.0193	0.0147	0.0131	0.0159	0.0163	0.0254	0.0178	0.0176	0.0146	0.0181	0.0148	0.00603021	0.00636885	0.00632008	0.00674847	None	0	0	FALSE	FALSE		None
chr1	30741941	30742426	75411	M	None	0.0204	0.012	0.015	None	0.017	Other	1.7	1.13333	Ptp4a1	0.0076	0.0185	0.0154	0.0171	0.012	0.0115	0.0174	0.0234	0.0262	0.0179	0.0159	0.0159	0.00603021	0.00636885	0.00632008	0.00674847	None	0	1	FALSE	FALSE	mCerebrum-DS14024	None
chr1	30776249	30777005	75412	IM	None	0.02	0.0187	0.0138	None	0.0193	AllTSS2	1.06952	1.39855	Ptp4a1	0.0222	0.0112	0.0188	0.0138	0.0143	0.0133	0.0217	0.0226	0.0112	0.019	0.0218	0.0175	0.00603021	0.00636885	0.00632008	0.00674847	None	0	0	FALSE	FALSE		None
chr1	30777194	30777800	75413	I	M	0.0162	0.0177	0.0115	None	0.0232	Other	0.915254	2.01739	Ptp4a1	0.0216	0.014	0.0124	0.0098	0.012	0.0158	0.014	0.0208	0.0177	0.0259	0.0204	0.0196	0.00603021	0.00636885	0.00632008	0.00674847	None	0	1	FALSE	FALSE	mCerebrum-DS14024	None
chr1	30816623	30817295	75414	M	None	0.0212	0.0168	0.011	None	0.0163	Other	1.2619	1.48182	Ptp4a1	0.0179	0.0135	0.0176	0.0105	0.0092	0.0142	0.0199	0.022	0.0244	0.0153	0.0166	0.0184	0.00603021	0.00636885	0.00632008	0.00674847	None	0	1	FALSE	FALSE	E14-DS21450	None
chr1	30825846	30826285	75415	M	None	0.0216	0.0134	0.0106	None	0.0193	Other	1.61194	1.82075	Ptp4a1	0.0149	0.012	0.0113	0.0107	0.0085	0.012	0.0194	0.0245	0.0249	0.0177	0.0168	0.0257	0.00603021	0.00636885	0.00632008	0.00674847	None	0	1	FALSE	FALSE	mKidney-DS13948	None
chr1	30826450	30829182	75416	IM	M	0.0255	0.0245	0.014	None	0.0262	Other	1.04082	1.87143	Ptp4a1	0.0285	0.0201	0.0196	0.0145	0.0107	0.0155	0.0243	0.0306	0.0231	0.0237	0.0321	0.0263	0.00603021	0.00636885	0.00632008	0.00674847	None	0	1	FALSE	FALSE	mMesoderm-DS18198	None
chr1	30837056	30837644	75417	I	I	0.0126	0.0186	0.0272	None	0.0117	Other	0.677419	0.430147	Ptp4a1	0.0123	0.0292	0.0223	0.0276	0.0227	0.0301	0.0094	0.0196	0.0142	0.0067	0.0168	0.0186	0.00603021	0.00636885	0.00632008	0.00674847	None	0	1	FALSE	FALSE	CH12-DS22542	None
chr1	30851089	30851556	75418	M	None	0.0221	0.0155	0.0174	None	0.0207	Other	1.42581	1.18966	Ptp4a1	0.0143	0.0107	0.0241	0.0159	0.0188	0.0205	0.023	0.0177	0.0244	0.0177	0.0214	0.0275	0.00603021	0.00636885	0.00632008	0.00674847	None	0	0	FALSE	FALSE		None
chr1	30856494	30856935	75419	None	IM	0.0216	0.0192	0.023	None	0.0226	Other	1.125	0.982609	Ptp4a1	0.014	0.0204	0.031	0.0215	0.0262	0.0243	0.0185	0.0285	0.0231	0.0166	0.0269	0.0328	0.00603021	0.00636885	0.00632008	0.00674847	None	0	1	FALSE	FALSE	CH12-DS22542	None
chr1	30857049	30857834	75420	M	None	0.0253	0.0173	0.0219	None	0.0214	Other	1.46243	0.977169	Ptp4a1	0.0131	0.0237	0.0204	0.0216	0.0235	0.0216	0.0255	0.0227	0.0275	0.0175	0.0243	0.0278	0.00603021	0.00636885	0.00632008	0.00674847	None	0	1	FALSE	FALSE	mCerebrum-DS14024	None
chr1	30857955	30858378	75421	M	M	0.0231	0.0151	0.0178	None	0.025	Other	1.5298	1.40449	Ptp4a1	0.0132	0.014	0.0214	0.0192	0.0139	0.0173	0.0239	0.0184	0.0262	0.0214	0.0291	0.0299	0.00603021	0.00636885	0.00632008	0.00674847	None	0	1	FALSE	FALSE	mfLiver_F2-DS20994	None
chr1	30860851	30861137	75422	I	None	0.0208	0.0213	0.0127	None	0.0202	Other	0.976526	1.59055	Phf3	0.0216	0.0224	0.0193	0.0121	0.0155	0.0121	0.0216	0.0229	0.0158	0.019	0.0232	0.0203	0.00603021	0.00636885	0.00632008	0.00674847	None	0	2	FALSE	FALSE	mCJ7-DS13320 mMuscle_Skeletal-DS18130	None
chr1	30861618	30862127	75423	IM	None	0.0218	0.0194	0.0163	None	0.0198	Other	1.12371	1.21472	Phf3	0.0201	0.0192	0.0179	0.0176	0.0148	0.0141	0.0217	0.0234	0.0204	0.0167	0.0256	0.021	0.00603021	0.00636885	0.00632008	0.00674847	None	0	2	FALSE	FALSE	ZhBTc4-DS17616 ZhBTc4-DS15236	None
chr1	30904700	30905100	75424	M	None	0.0244	0.02	0.0196	None	0.0152	Other	1.22	0.77551	Phf3	0.0166	0.0224	0.0259	0.0197	0.0219	0.0174	0.0239	0.0207	0.0307	0.0099	0.0197	0.0238	0.00603021	0.00636885	0.00632008	0.00674847	None	0	1	FALSE	FALSE	ZhBTc4-DS17616	None
chr1	30906686	30907071	75425	M	None	0.025	0.0189	0.0196	None	0.0198	Enhancer4	1.32275	1.0102	Phf3	0.0137	0.0269	0.0226	0.0205	0.0164	0.0199	0.026	0.0225	0.0248	0.017	0.0205	0.0261	0.00603021	0.00636885	0.00632008	0.00674847	None	0	1	FALSE	FALSE	mLung-DS14479	None
chr1	30907635	30908058	75426	M	None	0.0251	0.0186	0.0148	None	0.0145	Enhancer4	1.34946	0.97973	Phf3	0.0115	0.0294	0.0239	0.0158	0.0119	0.0145	0.0252	0.0223	0.0282	0.0122	0.0144	0.0203	0.00603021	0.00636885	0.00632008	0.00674847	None	0	1	FALSE	FALSE	mIntestine_Large-DS19140	None
chr1	30908703	30909657	75427	IM	I	0.0277	0.0248	0.0245	None	0.0181	Other	1.11694	0.738776	Phf3	0.0177	0.0341	0.0319	0.0252	0.0246	0.0226	0.028	0.0262	0.0289	0.0166	0.0169	0.0232	0.00603021	0.00636885	0.00632008	0.00674847	None	0	2	FALSE	FALSE	MEL-DS13036 MEL-DS13036 mGER-DS15420	None
chr1	30928737	30931475	75428	IM	IM	0.0709	0.0655	0.0632	None	0.052	AllTSS2	1.08244	0.822785	Ptp4a1	0.0653	0.0724	0.0578	0.0761	0.0302	0.0548	0.0917	0.04	0.0422	0.0568	0.0512	0.0407	0.00603021	0.00636885	0.00632008	0.00674847	cUMR	2944	11	FALSE	FALSE	m416B-DS14099 mCD19-DS16168 mfLiver_F5-DS20999 mA20-DS16695 mPATSKI-DS15697 mfLiver_F5-DS20999 m3134-DS8497 mfLiver_F3-DS20937 mB-DS17866 mRetina-DS20000 mfLiver_F2-DS20994 mfLiver_F5-DS20999 MEL-DS13036	None
chr1	30931695	30931946	75429	None	I	0.017	0.0163	0.0265	None	0.0155	Enhancer4	1.04294	0.584906	Ptp4a1	0.0123	0.0269	0.014	0.0211	0.0358	0.0339	0.0154	0.0153	0.0239	0.0176	0.0155	0.0104	0.00603021	0.00636885	0.00632008	0.00674847	cUMR	2944	2	FALSE	FALSE	MEL-DS13036 mATn-DS17070	None
chr1	30932700	30933219	75430	I	None	0.0191	0.0221	0.0183	None	0.0204	Enhancer4	0.864253	1.11475	Ptp4a1	0.0225	0.0212	0.0224	0.0154	0.0123	0.0315	0.0167	0.0228	0.022	0.0198	0.0205	0.0219	0.00603021	0.00636885	0.00632008	0.00674847	None	0	2	FALSE	FALSE	mGenitalFatPad-DS18780 mFatPad-DS14021	None
chr1	30962070	30962408	75431	M	None	0.0221	0.0139	0.0136	None	0.0185	Other	1.58993	1.36029	Ptp4a1	0.0096	0.0163	0.0218	0.0118	0.0164	0.0162	0.0233	0.0109	0.0316	0.0185	0.0172	0.02	0.00603021	0.00636885	0.00632008	0.00674847	None	0	0	FALSE	FALSE		None
chr1	30977466	30977956	75432	None	I	0.0181	0.0207	0.0263	None	0.0155	Other	0.874396	0.589354	Ptp4a1	0.0173	0.0253	0.0238	0.0217	0.0353	0.0316	0.0165	0.0158	0.0261	0.0116	0.0181	0.0224	0.00603021	0.00636885	0.00632008	0.00674847	None	0	1	FALSE	FALSE	mTN-DS16171	None
chr1	31003970	31007667	75433	IM	IM	0.0626	0.0537	0.0511	None	0.0405	AllTSS2	1.16574	0.792564	Ptp4a1 Gm13363	0.0489	0.0667	0.0507	0.0599	0.0288	0.0452	0.0798	0.0355	0.0406	0.0383	0.0468	0.0393	0.00603021	0.00636885	0.00632008	0.00674847	cUMR	2090	10	FALSE	FALSE	mFatPad-DS14021 mLiver-DS14005 mGER-DS15420 mATn-DS17070 mPATSKI-DS15697 CH12-DS22542 m3134-DS8497 mATn-DS17070 m3134-DS8497 mfBrain-DS14536 mSpleen-DS18870 mA20-DS16695 mLiver-DS14005	None
chr1	31124544	31125113	75438	M	None	0.0195	0.0101	0.0105	None	0.0139	Other	1.93069	1.32381	Ptp4a1	0.0094	0.0095	0.0125	0.0102	0.0135	0.0089	0.0197	0.0175	0.0213	0.0122	0.0148	0.0171	0.00603021	0.00636885	0.00632008	0.00674847	None	0	0	FALSE	FALSE		None
chr1	31148516	31148964	75440	M	None	0.0181	0.0127	0.0145	None	0.0165	Other	1.4252	1.13793	4930521A18Rik	0.0086	0.0174	0.0176	0.0135	0.0209	0.0121	0.0177	0.0199	0.0174	0.0172	0.0176	0.0136	0.00603021	0.00636885	0.00632008	0.00674847	None	0	1	FALSE	FALSE	mLung-DS14479	None
chr1	31156994	31157443	75441	M	None	0.0182	0.0112	0.013	None	0.0138	Other	1.625	1.06154	4930521A18Rik	0.0105	0.0098	0.0144	0.0137	0.0121	0.0115	0.0163	0.013	0.03	0.0148	0.0103	0.0151	0.00603021	0.00636885	0.00632008	0.00674847	None	0	1	FALSE	FALSE	mPATSKI-DS15697	None
chr1	31159623	31160444	75442	M	M	0.0185	0.0122	0.0148	None	0.0183	Other	1.51639	1.23649	4930521A18Rik	0.0101	0.012	0.0176	0.0121	0.018	0.0198	0.0186	0.0203	0.0163	0.0192	0.0181	0.0164	0.00603021	0.00636885	0.00632008	0.00674847	None	0	2	FALSE	FALSE	mHeart-DS17909 ZhBTc4-DS15236	None
chr1	31160888	31162015	75443	IM	M	0.0198	0.0139	0.0138	None	0.0183	Other	1.42446	1.32609	4930521A18Rik	0.0131	0.0134	0.0166	0.0138	0.0124	0.0151	0.0169	0.0242	0.0238	0.017	0.0191	0.0205	0.00603021	0.00636885	0.00632008	0.00674847	None	0	1	FALSE	FALSE	mFibroblast-DS10088	None
chr1	31166183	31166800	75444	M	None	0.0193	0.0105	0.0141	None	0.0128	Other	1.8381	0.907801	4930521A18Rik	0.0085	0.0133	0.0124	0.0138	0.0149	0.0144	0.0197	0.0176	0.02	0.0141	0.0065	0.0162	0.00603021	0.00636885	0.00632008	0.00674847	None	0	0	FALSE	FALSE		None
chr1	31191646	31192253	75447	M	None	0.0196	0.0088	0.0104	None	0.0098	Other	2.22727	0.942308	4930521A18Rik	0.0057	0.0117	0.0132	0.0107	0.0108	0.0094	0.0195	0.0174	0.0223	0.0108	0.0062	0.011	0.00603021	0.00636885	0.00632008	0.00674847	None	0	0	FALSE	FALSE		None
chr1	31192486	31193209	75448	M	None	0.0194	0.0149	0.0113	None	0.0176	Other	1.30201	1.55752	4930521A18Rik	0.0127	0.0162	0.0188	0.0112	0.0117	0.0112	0.0174	0.0203	0.0245	0.0182	0.0138	0.0204	0.00603021	0.00636885	0.00632008	0.00674847	None	0	0	FALSE	FALSE		None
chr1	31210759	31211213	75449	None	I	0.005	0.01	0.0201	None	0.011	Other	0.5	0.547264	4931428L18Rik	0.0064	0.0166	0.0115	0.0176	0.0275	0.021	0.006	0.003	0.0042	0.0104	0.0105	0.0129	0.00603021	0.00636885	0.00632008	0.00674847	None	0	1	FALSE	FALSE	mPATSKI-DS15697	None
chr1	31266895	31267506	75450	I	I	0.0089	0.0142	0.0203	None	0.0095	Other	0.626761	0.46798	4931428L18Rik	0.0081	0.0211	0.0216	0.0186	0.0275	0.0191	0.0108	0.0048	0.0079	0.0086	0.0108	0.0103	0.00603021	0.00636885	0.00632008	0.00674847	None	0	1	FALSE	FALSE	mfBrain-DS14536	None
chr1	31269109	31269997	75451	M	None	0.0219	0.0131	0.0092	None	0.0121	Other	1.67176	1.31522	4931428L18Rik	0.0104	0.0175	0.0147	0.0096	0.0115	0.0062	0.0254	0.0163	0.0175	0.0116	0.0121	0.0136	0.00603021	0.00636885	0.00632008	0.00674847	None	0	0	FALSE	FALSE		None
chr1	31270132	31270970	75452	M	None	0.0201	0.0119	0.0108	None	0.0117	Other	1.68908	1.08333	4931428L18Rik	0.0116	0.0172	0.0065	0.0114	0.0107	0.0092	0.0235	0.0129	0.0182	0.0133	0.009	0.0105	0.00603021	0.00636885	0.00632008	0.00674847	None	0	0	FALSE	FALSE		None
chr1	31271179	31272294	75453	IM	None	0.0207	0.0171	0.0098	None	0.0147	Other	1.21053	1.5	4931428L18Rik	0.0161	0.0193	0.017	0.0093	0.0052	0.0151	0.0204	0.0198	0.0225	0.0154	0.0154	0.0123	0.00603021	0.00636885	0.00632008	0.00674847	None	0	1	FALSE	FALSE	mHeart-DS17909	None
chr1	31272348	31273319	75454	M	None	0.0188	0.0109	0.0081	None	0.0114	Other	1.72477	1.40741	4931428L18Rik	0.0084	0.0159	0.0114	0.0088	0.0089	0.0054	0.0204	0.0178	0.0152	0.0118	0.009	0.0127	0.00603021	0.00636885	0.00632008	0.00674847	None	0	0	FALSE	FALSE		None
chr1	31273739	31274644	75455	M	None	0.021	0.0121	0.0102	None	0.0115	Other	1.73554	1.12745	4931428L18Rik	0.0091	0.0171	0.0139	0.0097	0.0088	0.0128	0.0214	0.0167	0.0246	0.0091	0.0102	0.019	0.00603021	0.00636885	0.00632008	0.00674847	None	0	0	FALSE	FALSE		None
chr1	31279157	31279937	75458	M	I	0.0158	0.0119	0.0213	None	0.0161	AllTSS2	1.32773	0.755869	4931428L18Rik 4930521A18Rik	0.0117	0.012	0.0121	0.0225	0.0145	0.0236	0.0155	0.0177	0.0146	0.0156	0.0128	0.0206	0.00603021	0.00636885	0.00632008	0.00674847	None	0	1	FALSE	FALSE	CH12-DS22542	None
chr1	31291611	31292492	75459	M	None	0.0172	0.0102	0.0125	None	0.0153	Other	1.68627	1.224	4930521A18Rik	0.0109	0.0085	0.0104	0.013	0.0113	0.0123	0.0192	0.0122	0.0165	0.0167	0.0094	0.0182	0.00603021	0.00636885	0.00632008	0.00674847	None	0	0	FALSE	FALSE		None
chr1	31292610	31293116	75460	M	M	0.0183	0.009	0.0131	None	0.0186	Other	2.03333	1.41985	4930521A18Rik	0.0078	0.0087	0.0124	0.0119	0.0165	0.0138	0.0162	0.0164	0.0273	0.0178	0.0202	0.019	0.00603021	0.00636885	0.00632008	0.00674847	None	0	0	FALSE	FALSE		None
chr1	31315073	31316605	75461	M	M	0.0176	0.0127	0.0125	None	0.0199	AllTSS2	1.38583	1.592	4930521A18Rik	0.0154	0.01	0.0093	0.0125	0.012	0.0129	0.0172	0.0178	0.0187	0.0235	0.0191	0.0119	0.00603021	0.00636885	0.00632008	0.00674847	None	0	0	FALSE	FALSE		None
chr1	31316807	31317665	75462	None	M	0.0171	0.0121	0.0119	None	0.0209	Other	1.41322	1.7563	4930521A18Rik	0.0108	0.0138	0.0135	0.0127	0.0111	0.0103	0.0137	0.0189	0.0258	0.0232	0.0174	0.0188	0.00603021	0.00636885	0.00632008	0.00674847	None	0	2	FALSE	FALSE	mBrain-DS12727 mCerebrum-DS14024	None
chr1	31328598	31329412	75466	M	None	0.0149	0.01	0.0132	None	0.0138	Other	1.49	1.04545	4930521A18Rik	0.0065	0.0147	0.0133	0.0125	0.0111	0.017	0.0143	0.0161	0.0151	0.0131	0.013	0.0162	0.00603021	0.00636885	0.00632008	0.00674847	None	0	0	FALSE	FALSE		None
chr1	31398431	31399053	75469	M	None	0.0178	0.0088	0.0106	None	0.0108	Other	2.02273	1.01887	4930521A18Rik	0.0074	0.0092	0.012	0.0094	0.0114	0.0135	0.0203	0.0112	0.0179	0.011	0.0058	0.0155	0.00603021	0.00636885	0.00632008	0.00674847	None	0	0	FALSE	FALSE		None
chr1	31450299	31450687	75472	None	M	0.0141	0.0117	0.0124	None	0.0187	Other	1.20513	1.50806	4930521A18Rik	0.0157	0.006	0.0083	0.0119	0.0157	0.0112	0.013	0.0143	0.0171	0.0244	0.0113	0.0123	0.00603021	0.00636885	0.00632008	0.00674847	None	0	0	FALSE	FALSE		None
chr1	31499146	31499490	75481	M	None	0.0192	0.0119	0.0132	None	0.012	Other	1.61345	0.909091	4930521A18Rik	0.0061	0.0187	0.0185	0.0111	0.0204	0.013	0.0227	0.0139	0.0141	0.0114	0.0125	0.0127	0.00603021	0.00636885	0.00632008	0.00674847	None	0	1	FALSE	FALSE	mCerebrum-DS14024	None
chr1	31597519	31598171	75484	M	None	0.0175	0.0108	0.014	None	0.0136	Other	1.62037	0.971429	4930521A18Rik	0.007	0.0191	0.0106	0.0143	0.0108	0.0158	0.0142	0.023	0.0212	0.0118	0.0159	0.0156	0.00603021	0.00636885	0.00632008	0.00674847	None	0	0	FALSE	FALSE		None
chr1	31617150	31617779	75486	M	None	0.0161	0.0082	0.0118	None	0.0127	Other	1.96341	1.07627	4930521A18Rik	0.0057	0.0108	0.0115	0.0114	0.012	0.0127	0.016	0.0126	0.0208	0.0134	0.0105	0.0134	0.00603021	0.00636885	0.00632008	0.00674847	None	0	0	FALSE	FALSE		None
chr1	31671866	31674024	75490	IM	IM	0.0163	0.0154	0.0196	None	0.0183	AllTSS2	1.05844	0.933673	4930521A18Rik	0.0158	0.0147	0.0153	0.0207	0.0157	0.02	0.0174	0.0171	0.0118	0.0182	0.0189	0.018	0.00603021	0.00636885	0.00632008	0.00674847	None	0	1	FALSE	FALSE	m416B-DS14099 m416B-DS14099 m416B-DS14099	None
chr1	31786902	31787577	75496	M	None	0.0151	0.0084	0.0079	None	0.0105	Other	1.79762	1.32911	Khdrbs2	0.007	0.0065	0.0141	0.0092	0.0067	0.0056	0.0149	0.0159	0.0149	0.0093	0.0097	0.0144	0.00603021	0.00636885	0.00632008	0.00674847	None	0	1	FALSE	FALSE	mCerebrum-DS14024	None
chr1	31792785	31793509	75497	M	None	0.0162	0.0117	0.0094	None	0.0137	AllTSS2	1.38462	1.45745	Khdrbs2	0.0112	0.0123	0.012	0.0089	0.0072	0.0125	0.0162	0.0175	0.0146	0.0145	0.0137	0.0116	0.00603021	0.00636885	0.00632008	0.00674847	None	0	0	FALSE	FALSE		None
chr1	31807013	31807610	75500	M	None	0.0174	0.0101	0.0128	None	0.0156	Other	1.72277	1.21875	Khdrbs2	0.0075	0.0118	0.0148	0.0134	0.0123	0.0118	0.0172	0.0135	0.0228	0.0175	0.0123	0.0141	0.00603021	0.00636885	0.00632008	0.00674847	None	0	0	FALSE	FALSE		None
chr1	31889970	31890554	75501	M	None	0.018	0.0082	0.009	None	0.0112	Other	2.19512	1.24444	Khdrbs2	0.0052	0.0101	0.0138	0.0086	0.01	0.0091	0.0163	0.0199	0.0214	0.0115	0.01	0.0118	0.00603021	0.00636885	0.00632008	0.00674847	None	0	0	FALSE	FALSE		None
chr1	31891057	31891826	75502	M	None	0.0191	0.0061	0.0113	None	0.0081	Other	3.13115	0.716814	Khdrbs2	0.0041	0.0076	0.0098	0.0121	0.0107	0.0096	0.0194	0.0176	0.0198	0.0078	0.0088	0.0085	0.00603021	0.00636885	0.00632008	0.00674847	None	0	1	FALSE	FALSE	mGenitalFatPad-DS18780	None
chr1	31973044	31973834	75504	M	None	0.019	0.0077	0.011	None	0.011	Other	2.46753	1	Khdrbs2	0.0054	0.01	0.0108	0.0117	0.0088	0.0108	0.0195	0.0163	0.0206	0.014	0.007	0.0078	0.00603021	0.00636885	0.00632008	0.00674847	None	0	0	FALSE	FALSE		None
chr1	32131740	32132364	75513	M	None	0.0179	0.0121	0.0109	None	0.0101	Other	1.47934	0.926606	Khdrbs2	0.0084	0.0194	0.0133	0.0091	0.012	0.0151	0.0191	0.0141	0.0184	0.0076	0.0095	0.0167	0.00603021	0.00636885	0.00632008	0.00674847	None	0	0	FALSE	FALSE		None
chr1	32132551	32133878	75514	M	None	0.0203	0.0088	0.0095	None	0.0125	Other	2.30682	1.31579	Khdrbs2	0.006	0.0128	0.0112	0.0103	0.0075	0.009	0.023	0.0177	0.0146	0.0109	0.0118	0.0174	0.00603021	0.00636885	0.00632008	0.00674847	None	0	0	FALSE	FALSE		None
chr1	32184652	32185156	75518	M	None	0.0176	0.01	0.0112	None	0.0112	Other	1.76	1	Khdrbs2	0.0094	0.0104	0.0111	0.0115	0.0152	0.0068	0.0191	0.0117	0.0199	0.011	0.0091	0.0137	0.00603021	0.00636885	0.00632008	0.00674847	None	0	0	FALSE	FALSE		None
chr1	32227147	32227528	75520	M	None	0.0182	0.0084	0.0084	None	0.0121	Other	2.16667	1.44048	Khdrbs2	0.0065	0.0114	0.0098	0.0087	0.0057	0.01	0.0224	0.0091	0.0156	0.0112	0.0147	0.0119	0.00603021	0.00636885	0.00632008	0.00674847	None	0	0	FALSE	FALSE		None
chr1	32228046	32230679	75521	IM	M	0.0222	0.017	0.0097	None	0.016	AllTSS2	1.30588	1.64948	Khdrbs2	0.0171	0.0184	0.0152	0.01	0.0087	0.0098	0.0232	0.0223	0.0187	0.0136	0.0194	0.0184	0.00603021	0.00636885	0.00632008	0.00674847	None	0	3	FALSE	FALSE	mfBrain-DS14536 mRetina-DS20000 mBrain-DS12727	None
chr1	32230758	32232365	75522	M	None	0.0195	0.0109	0.0121	None	0.0129	Other	1.78899	1.06612	Khdrbs2	0.0079	0.016	0.0122	0.0133	0.0136	0.0075	0.0223	0.0155	0.0153	0.0122	0.0148	0.0127	0.00603021	0.00636885	0.00632008	0.00674847	None	0	2	FALSE	FALSE	mRetina-DS19060 mCerebrum-DS14024 mCerebrum-DS14024	None
chr1	32232622	32233159	75523	M	None	0.0174	0.0099	0.0096	None	0.0106	Other	1.75758	1.10417	Khdrbs2	0.0075	0.0137	0.0115	0.0094	0.0151	0.0054	0.0184	0.0173	0.0142	0.0089	0.0135	0.0119	0.00603021	0.00636885	0.00632008	0.00674847	None	0	1	FALSE	FALSE	mKidney-DS13948	None
chr1	32233998	32234483	75525	M	M	0.0166	0.0096	0.0101	None	0.0169	Other	1.72917	1.67327	Khdrbs2	0.0077	0.0124	0.0113	0.0092	0.0144	0.0089	0.0172	0.016	0.0154	0.0175	0.0173	0.015	0.00603021	0.00636885	0.00632008	0.00674847	None	0	0	FALSE	FALSE		None
chr1	32235422	32236064	75526	M	None	0.0183	0.0103	0.0128	None	0.0125	Other	1.7767	0.976562	Khdrbs2	0.0083	0.0115	0.014	0.012	0.014	0.014	0.0196	0.0124	0.021	0.0114	0.0145	0.0131	0.00603021	0.00636885	0.00632008	0.00674847	None	0	0	FALSE	FALSE		None
chr1	32236275	32236626	75527	M	None	0.0188	0.0128	0.0088	None	0.0164	Other	1.46875	1.86364	Khdrbs2	0.0096	0.0134	0.0204	0.0073	0.0098	0.0122	0.0201	0.016	0.018	0.0171	0.0169	0.0142	0.00603021	0.00636885	0.00632008	0.00674847	None	0	0	FALSE	FALSE		None
chr1	32326473	32328634	75529	M	M	0.0185	0.0111	0.0099	None	0.0164	Other	1.66667	1.65657	Khdrbs2	0.0109	0.0112	0.0115	0.011	0.0083	0.0081	0.0179	0.0186	0.02	0.0179	0.0168	0.0123	0.00603021	0.00636885	0.00632008	0.00674847	None	0	1	FALSE	FALSE	mCerebrum-DS14024	None
chr1	32339833	32340707	75532	M	IM	0.0201	0.0128	0.0181	None	0.0163	Other	1.57031	0.900552	Khdrbs2	0.0083	0.0223	0.0132	0.0166	0.0194	0.0209	0.0183	0.0191	0.0271	0.0159	0.0163	0.0172	0.00603021	0.00636885	0.00632008	0.00674847	None	0	0	FALSE	FALSE		None
chr1	32341777	32342226	75534	M	None	0.0165	0.0106	0.0134	None	0.0111	Other	1.5566	0.828358	Khdrbs2	0.0097	0.0147	0.0083	0.0131	0.0147	0.0129	0.0186	0.0131	0.0139	0.0106	0.0092	0.0143	0.00603021	0.00636885	0.00632008	0.00674847	None	0	0	FALSE	FALSE		None
chr1	32343142	32344169	75536	M	None	0.0178	0.01	0.0124	None	0.0136	Other	1.78	1.09677	Khdrbs2	0.0077	0.0121	0.0134	0.0118	0.0117	0.0146	0.0177	0.0145	0.0219	0.0155	0.0059	0.0169	0.00603021	0.00636885	0.00632008	0.00674847	None	0	0	FALSE	FALSE		None
chr1	32344286	32347939	75537	M	I	0.0193	0.0103	0.0158	None	0.0137	Other	1.87379	0.867089	Khdrbs2	0.0076	0.0154	0.011	0.0157	0.0154	0.0164	0.0204	0.0164	0.0189	0.0146	0.0114	0.0138	0.00603021	0.00636885	0.00632008	0.00674847	None	0	1	FALSE	FALSE	mCJ7-DS13320	None
chr1	32428364	32429005	75540	M	None	0.0184	0.0092	0.0088	None	0.0148	Other	2	1.68182	Khdrbs2	0.0095	0.0077	0.0104	0.0097	0.0093	0.006	0.0198	0.0148	0.0181	0.016	0.0121	0.0145	0.00603021	0.00636885	0.00632008	0.00674847	None	0	0	FALSE	FALSE		None
chr1	32641843	32642490	75560	M	None	0.0172	0.0076	0.0088	None	0.0099	Other	2.26316	1.125	Khdrbs2	0.0057	0.0102	0.0093	0.0084	0.0055	0.0125	0.0182	0.0135	0.0183	0.01	0.0108	0.0089	0.00603021	0.00636885	0.00632008	0.00674847	None	0	1	FALSE	FALSE	mKidney-DS13948	None
chr1	32747252	32747745	75566	M	None	0.014	0.0089	0.0078	None	0.0113	Other	1.57303	1.44872	Khdrbs2	0.0072	0.0085	0.0134	0.008	0.0067	0.0082	0.013	0.0148	0.0161	0.0095	0.0136	0.0134	0.00603021	0.00636885	0.00632008	0.00674847	None	0	1	FALSE	FALSE	mIntestine_Large-DS19140	None
chr1	32750122	32751203	75567	M	None	0.0167	0.0117	0.0109	None	0.0133	Other	1.42735	1.22018	Khdrbs2	0.0093	0.0159	0.0131	0.0093	0.0134	0.0135	0.0165	0.0154	0.019	0.0126	0.0146	0.0137	0.00603021	0.00636885	0.00632008	0.00674847	None	0	0	FALSE	FALSE		None
[truncated: 122,224 more rows]

## Sheet: PeaksTable.txt
chrom	start	stop	number	ER4.Peak.status	G1E.Peak.status	EMP	EAP	GAP	Gata1.status	GMP	Function4.statusnew	ER4.MvA	G1E.MvA	GeneAssign	EA1	EA2	EA3	GA1	GA2	GA3	EM1	EM2	EM3	GM1	GM2	GM3	EAP_bkgrdFseq	EMP_bkgrdFseq	GAP_bkgrdFseq	GMP_bkgrdFseq	EvGexpression.combostatus
[truncated: 27,978 more rows]
